# Supplementary material for: Biosensor Guided Polyketide Synthases Engineering for Optimization of Domain Exchange Boundaries
Source: Nat Commun. 2023 Aug 12;14:4871. doi: 10.1038/s41467-023-40464-x (PMC10423236; doi:10.1038/s41467-023-40464-x)
Supplement: Supplementary file 4 — Supplementary Data 1 - oligo pool library sequences [file 41467_2023_40464_MOESM4_ESM.xlsx]

## Sheet: Forward
							Sequences in red gave duplicate sequences as variant above so they were not included in order
		5'	Variable	Annealing	Total	Length
us102	F1	gcggtaccaacgcacatgtg	attattgctgaaccgccggaaccggaaccgctgccggaaccgggtccggttggcgtcctggccgcagctaattccgtgccggttctgctgtcagcccgtaccgaaaccgccctggcggcacaggcacgtctgctggaatctgcggtcgatgacagtgtgccgctgaccgcactggctagtgcgctggccaccggtcgtgcccatctgccgcgtcgcgcagctctgctggccggcgatcacgaacagctgcgtggtcaactgcgcgcagttgctgaaggtgtcgccgcaccgggtgccaccacc	TGCATCGCGAGTTCCTCACGT	gcggtaccaacgcacatgtgattattgctgaaccgccggaaccggaaccgctgccggaaccgggtccggttggcgtcctggccgcagctaattccgtgccggttctgctgtcagcccgtaccgaaaccgccctggcggcacaggcacgtctgctggaatctgcggtcgatgacagtgtgccgctgaccgcactggctagtgcgctggccaccggtcgtgcccatctgccgcgtcgcgcagctctgctggccggcgatcacgaacagctgcgtggtcaactgcgcgcagttgctgaaggtgtcgccgcaccgggtgccaccaccTGCATCGCGAGTTCCTCACGT	344	gcggtaccaacgcacatgtgattattgctgaaccgccggaaccggaaccgctgccggaaccgggtccggttggcgtcctggccgcagctaattccgtgccggttctgctgtcagcccgtaccgaaaccgccctggcggcacaggcacgtctgctggaatctgcggtcgatgacagtgtgccgctgaccgcactggctagtgcgctggccaccggtcgtgcccatctgccgcgtcgcgcagctctgctggccggcgatcacgaacagctgcgtggtcaactgcgcgcagttgctgaaggtgtcgccgcaccgggtgccaccaccTGCATCGCGAGTTCCTCACGT
us101	F2	gcggtaccaacgcacatgtg	attattgctgaaccgccggaaccggaaccgctgccggaaccgggtccggttggcgtcctggccgcagctaattccgtgccggttctgctgtcagcccgtaccgaaaccgccctggcggcacaggcacgtctgctggaatctgcggtcgatgacagtgtgccgctgaccgcactggctagtgcgctggccaccggtcgtgcccatctgccgcgtcgcgcagctctgctggccggcgatcacgaacagctgcgtggtcaactgcgcgcagttgctgaaggtgtcgccgcaccgggtgccaccCGC	TGCATCGCGAGTTCCTCACGT	gcggtaccaacgcacatgtgattattgctgaaccgccggaaccggaaccgctgccggaaccgggtccggttggcgtcctggccgcagctaattccgtgccggttctgctgtcagcccgtaccgaaaccgccctggcggcacaggcacgtctgctggaatctgcggtcgatgacagtgtgccgctgaccgcactggctagtgcgctggccaccggtcgtgcccatctgccgcgtcgcgcagctctgctggccggcgatcacgaacagctgcgtggtcaactgcgcgcagttgctgaaggtgtcgccgcaccgggtgccaccCGCTGCATCGCGAGTTCCTCACGT	344	gcggtaccaacgcacatgtgattattgctgaaccgccggaaccggaaccgctgccggaaccgggtccggttggcgtcctggccgcagctaattccgtgccggttctgctgtcagcccgtaccgaaaccgccctggcggcacaggcacgtctgctggaatctgcggtcgatgacagtgtgccgctgaccgcactggctagtgcgctggccaccggtcgtgcccatctgccgcgtcgcgcagctctgctggccggcgatcacgaacagctgcgtggtcaactgcgcgcagttgctgaaggtgtcgccgcaccgggtgccaccCGCTGCATCGCGAGTTCCTCACGT
us100	F3	gcggtaccaacgcacatgtg	attattgctgaaccgccggaaccggaaccgctgccggaaccgggtccggttggcgtcctggccgcagctaattccgtgccggttctgctgtcagcccgtaccgaaaccgccctggcggcacaggcacgtctgctggaatctgcggtcgatgacagtgtgccgctgaccgcactggctagtgcgctggccaccggtcgtgcccatctgccgcgtcgcgcagctctgctggccggcgatcacgaacagctgcgtggtcaactgcgcgcagttgctgaaggtgtcgccgcaccgggtgccGCGCGC	TGCATCGCGAGTTCCTCACGT	gcggtaccaacgcacatgtgattattgctgaaccgccggaaccggaaccgctgccggaaccgggtccggttggcgtcctggccgcagctaattccgtgccggttctgctgtcagcccgtaccgaaaccgccctggcggcacaggcacgtctgctggaatctgcggtcgatgacagtgtgccgctgaccgcactggctagtgcgctggccaccggtcgtgcccatctgccgcgtcgcgcagctctgctggccggcgatcacgaacagctgcgtggtcaactgcgcgcagttgctgaaggtgtcgccgcaccgggtgccGCGCGCTGCATCGCGAGTTCCTCACGT	344	gcggtaccaacgcacatgtgattattgctgaaccgccggaaccggaaccgctgccggaaccgggtccggttggcgtcctggccgcagctaattccgtgccggttctgctgtcagcccgtaccgaaaccgccctggcggcacaggcacgtctgctggaatctgcggtcgatgacagtgtgccgctgaccgcactggctagtgcgctggccaccggtcgtgcccatctgccgcgtcgcgcagctctgctggccggcgatcacgaacagctgcgtggtcaactgcgcgcagttgctgaaggtgtcgccgcaccgggtgccGCGCGCTGCATCGCGAGTTCCTCACGT
us99	F4	gcggtaccaacgcacatgtg	attattgctgaaccgccggaaccggaaccgctgccggaaccgggtccggttggcgtcctggccgcagctaattccgtgccggttctgctgtcagcccgtaccgaaaccgccctggcggcacaggcacgtctgctggaatctgcggtcgatgacagtgtgccgctgaccgcactggctagtgcgctggccaccggtcgtgcccatctgccgcgtcgcgcagctctgctggccggcgatcacgaacagctgcgtggtcaactgcgcgcagttgctgaaggtgtcgccgcaccgggtGCCGCGCGC	TGCATCGCGAGTTCCTCACGT	gcggtaccaacgcacatgtgattattgctgaaccgccggaaccggaaccgctgccggaaccgggtccggttggcgtcctggccgcagctaattccgtgccggttctgctgtcagcccgtaccgaaaccgccctggcggcacaggcacgtctgctggaatctgcggtcgatgacagtgtgccgctgaccgcactggctagtgcgctggccaccggtcgtgcccatctgccgcgtcgcgcagctctgctggccggcgatcacgaacagctgcgtggtcaactgcgcgcagttgctgaaggtgtcgccgcaccgggtGCCGCGCGCTGCATCGCGAGTTCCTCACGT	344	gcggtaccaacgcacatgtgattattgctgaaccgccggaaccggaaccgctgccggaaccgggtccggttggcgtcctggccgcagctaattccgtgccggttctgctgtcagcccgtaccgaaaccgccctggcggcacaggcacgtctgctggaatctgcggtcgatgacagtgtgccgctgaccgcactggctagtgcgctggccaccggtcgtgcccatctgccgcgtcgcgcagctctgctggccggcgatcacgaacagctgcgtggtcaactgcgcgcagttgctgaaggtgtcgccgcaccgggtGCCGCGCGCTGCATCGCGAGTTCCTCACGT
us98	F5	gcggtaccaacgcacatgtg	attattgctgaaccgccggaaccggaaccgctgccggaaccgggtccggttggcgtcctggccgcagctaattccgtgccggttctgctgtcagcccgtaccgaaaccgccctggcggcacaggcacgtctgctggaatctgcggtcgatgacagtgtgccgctgaccgcactggctagtgcgctggccaccggtcgtgcccatctgccgcgtcgcgcagctctgctggccggcgatcacgaacagctgcgtggtcaactgcgcgcagttgctgaaggtgtcgccgcaccgGGAGCCGCGCGC	TGCATCGCGAGTTCCTCACGT	gcggtaccaacgcacatgtgattattgctgaaccgccggaaccggaaccgctgccggaaccgggtccggttggcgtcctggccgcagctaattccgtgccggttctgctgtcagcccgtaccgaaaccgccctggcggcacaggcacgtctgctggaatctgcggtcgatgacagtgtgccgctgaccgcactggctagtgcgctggccaccggtcgtgcccatctgccgcgtcgcgcagctctgctggccggcgatcacgaacagctgcgtggtcaactgcgcgcagttgctgaaggtgtcgccgcaccgGGAGCCGCGCGCTGCATCGCGAGTTCCTCACGT	344	gcggtaccaacgcacatgtgattattgctgaaccgccggaaccggaaccgctgccggaaccgggtccggttggcgtcctggccgcagctaattccgtgccggttctgctgtcagcccgtaccgaaaccgccctggcggcacaggcacgtctgctggaatctgcggtcgatgacagtgtgccgctgaccgcactggctagtgcgctggccaccggtcgtgcccatctgccgcgtcgcgcagctctgctggccggcgatcacgaacagctgcgtggtcaactgcgcgcagttgctgaaggtgtcgccgcaccgGGAGCCGCGCGCTGCATCGCGAGTTCCTCACGT
us97	F6	gcggtaccaacgcacatgtg	attattgctgaaccgccggaaccggaaccgctgccggaaccgggtccggttggcgtcctggccgcagctaattccgtgccggttctgctgtcagcccgtaccgaaaccgccctggcggcacaggcacgtctgctggaatctgcggtcgatgacagtgtgccgctgaccgcactggctagtgcgctggccaccggtcgtgcccatctgccgcgtcgcgcagctctgctggccggcgatcacgaacagctgcgtggtcaactgcgcgcagttgctgaaggtgtcgccgcaCCGGGAGCCGCGCGC	TGCATCGCGAGTTCCTCACGT	gcggtaccaacgcacatgtgattattgctgaaccgccggaaccggaaccgctgccggaaccgggtccggttggcgtcctggccgcagctaattccgtgccggttctgctgtcagcccgtaccgaaaccgccctggcggcacaggcacgtctgctggaatctgcggtcgatgacagtgtgccgctgaccgcactggctagtgcgctggccaccggtcgtgcccatctgccgcgtcgcgcagctctgctggccggcgatcacgaacagctgcgtggtcaactgcgcgcagttgctgaaggtgtcgccgcaCCGGGAGCCGCGCGCTGCATCGCGAGTTCCTCACGT	344	gcggtaccaacgcacatgtgattattgctgaaccgccggaaccggaaccgctgccggaaccgggtccggttggcgtcctggccgcagctaattccgtgccggttctgctgtcagcccgtaccgaaaccgccctggcggcacaggcacgtctgctggaatctgcggtcgatgacagtgtgccgctgaccgcactggctagtgcgctggccaccggtcgtgcccatctgccgcgtcgcgcagctctgctggccggcgatcacgaacagctgcgtggtcaactgcgcgcagttgctgaaggtgtcgccgcaCCGGGAGCCGCGCGCTGCATCGCGAGTTCCTCACGT
us96	F7	gcggtaccaacgcacatgtg	attattgctgaaccgccggaaccggaaccgctgccggaaccgggtccggttggcgtcctggccgcagctaattccgtgccggttctgctgtcagcccgtaccgaaaccgccctggcggcacaggcacgtctgctggaatctgcggtcgatgacagtgtgccgctgaccgcactggctagtgcgctggccaccggtcgtgcccatctgccgcgtcgcgcagctctgctggccggcgatcacgaacagctgcgtggtcaactgcgcgcagttgctgaaggtgtcgccCCTCCGGGAGCCGCGCGC	TGCATCGCGAGTTCCTCACGT	gcggtaccaacgcacatgtgattattgctgaaccgccggaaccggaaccgctgccggaaccgggtccggttggcgtcctggccgcagctaattccgtgccggttctgctgtcagcccgtaccgaaaccgccctggcggcacaggcacgtctgctggaatctgcggtcgatgacagtgtgccgctgaccgcactggctagtgcgctggccaccggtcgtgcccatctgccgcgtcgcgcagctctgctggccggcgatcacgaacagctgcgtggtcaactgcgcgcagttgctgaaggtgtcgccCCTCCGGGAGCCGCGCGCTGCATCGCGAGTTCCTCACGT	344	gcggtaccaacgcacatgtgattattgctgaaccgccggaaccggaaccgctgccggaaccgggtccggttggcgtcctggccgcagctaattccgtgccggttctgctgtcagcccgtaccgaaaccgccctggcggcacaggcacgtctgctggaatctgcggtcgatgacagtgtgccgctgaccgcactggctagtgcgctggccaccggtcgtgcccatctgccgcgtcgcgcagctctgctggccggcgatcacgaacagctgcgtggtcaactgcgcgcagttgctgaaggtgtcgccCCTCCGGGAGCCGCGCGCTGCATCGCGAGTTCCTCACGT
us95	F8	gcggtaccaacgcacatgtg	attattgctgaaccgccggaaccggaaccgctgccggaaccgggtccggttggcgtcctggccgcagctaattccgtgccggttctgctgtcagcccgtaccgaaaccgccctggcggcacaggcacgtctgctggaatctgcggtcgatgacagtgtgccgctgaccgcactggctagtgcgctggccaccggtcgtgcccatctgccgcgtcgcgcagctctgctggccggcgatcacgaacagctgcgtggtcaactgcgcgcagttgctgaaggtgtcACACCTCCGGGAGCCGCGCGC	TGCATCGCGAGTTCCTCACGT	gcggtaccaacgcacatgtgattattgctgaaccgccggaaccggaaccgctgccggaaccgggtccggttggcgtcctggccgcagctaattccgtgccggttctgctgtcagcccgtaccgaaaccgccctggcggcacaggcacgtctgctggaatctgcggtcgatgacagtgtgccgctgaccgcactggctagtgcgctggccaccggtcgtgcccatctgccgcgtcgcgcagctctgctggccggcgatcacgaacagctgcgtggtcaactgcgcgcagttgctgaaggtgtcACACCTCCGGGAGCCGCGCGCTGCATCGCGAGTTCCTCACGT	344	gcggtaccaacgcacatgtgattattgctgaaccgccggaaccggaaccgctgccggaaccgggtccggttggcgtcctggccgcagctaattccgtgccggttctgctgtcagcccgtaccgaaaccgccctggcggcacaggcacgtctgctggaatctgcggtcgatgacagtgtgccgctgaccgcactggctagtgcgctggccaccggtcgtgcccatctgccgcgtcgcgcagctctgctggccggcgatcacgaacagctgcgtggtcaactgcgcgcagttgctgaaggtgtcACACCTCCGGGAGCCGCGCGCTGCATCGCGAGTTCCTCACGT
us94	F9	gcggtaccaacgcacatgtg	attattgctgaaccgccggaaccggaaccgctgccggaaccgggtccggttggcgtcctggccgcagctaattccgtgccggttctgctgtcagcccgtaccgaaaccgccctggcggcacaggcacgtctgctggaatctgcggtcgatgacagtgtgccgctgaccgcactggctagtgcgctggccaccggtcgtgcccatctgccgcgtcgcgcagctctgctggccggcgatcacgaacagctgcgtggtcaactgcgcgcagttgctgaaggtCAGACACCTCCGGGAGCCGCGCGC	TGCATCGCGAGTTCCTCACGT	gcggtaccaacgcacatgtgattattgctgaaccgccggaaccggaaccgctgccggaaccgggtccggttggcgtcctggccgcagctaattccgtgccggttctgctgtcagcccgtaccgaaaccgccctggcggcacaggcacgtctgctggaatctgcggtcgatgacagtgtgccgctgaccgcactggctagtgcgctggccaccggtcgtgcccatctgccgcgtcgcgcagctctgctggccggcgatcacgaacagctgcgtggtcaactgcgcgcagttgctgaaggtCAGACACCTCCGGGAGCCGCGCGCTGCATCGCGAGTTCCTCACGT	344	gcggtaccaacgcacatgtgattattgctgaaccgccggaaccggaaccgctgccggaaccgggtccggttggcgtcctggccgcagctaattccgtgccggttctgctgtcagcccgtaccgaaaccgccctggcggcacaggcacgtctgctggaatctgcggtcgatgacagtgtgccgctgaccgcactggctagtgcgctggccaccggtcgtgcccatctgccgcgtcgcgcagctctgctggccggcgatcacgaacagctgcgtggtcaactgcgcgcagttgctgaaggtCAGACACCTCCGGGAGCCGCGCGCTGCATCGCGAGTTCCTCACGT
us93	F10	gcggtaccaacgcacatgtg	attattgctgaaccgccggaaccggaaccgctgccggaaccgggtccggttggcgtcctggccgcagctaattccgtgccggttctgctgtcagcccgtaccgaaaccgccctggcggcacaggcacgtctgctggaatctgcggtcgatgacagtgtgccgctgaccgcactggctagtgcgctggccaccggtcgtgcccatctgccgcgtcgcgcagctctgctggccggcgatcacgaacagctgcgtggtcaactgcgcgcagttgctgaaGGCCAGACACCTCCGGGAGCCGCGCGC	TGCATCGCGAGTTCCTCACGT	gcggtaccaacgcacatgtgattattgctgaaccgccggaaccggaaccgctgccggaaccgggtccggttggcgtcctggccgcagctaattccgtgccggttctgctgtcagcccgtaccgaaaccgccctggcggcacaggcacgtctgctggaatctgcggtcgatgacagtgtgccgctgaccgcactggctagtgcgctggccaccggtcgtgcccatctgccgcgtcgcgcagctctgctggccggcgatcacgaacagctgcgtggtcaactgcgcgcagttgctgaaGGCCAGACACCTCCGGGAGCCGCGCGCTGCATCGCGAGTTCCTCACGT	344	gcggtaccaacgcacatgtgattattgctgaaccgccggaaccggaaccgctgccggaaccgggtccggttggcgtcctggccgcagctaattccgtgccggttctgctgtcagcccgtaccgaaaccgccctggcggcacaggcacgtctgctggaatctgcggtcgatgacagtgtgccgctgaccgcactggctagtgcgctggccaccggtcgtgcccatctgccgcgtcgcgcagctctgctggccggcgatcacgaacagctgcgtggtcaactgcgcgcagttgctgaaGGCCAGACACCTCCGGGAGCCGCGCGCTGCATCGCGAGTTCCTCACGT
us92	F11	gcggtaccaacgcacatgtg	attattgctgaaccgccggaaccggaaccgctgccggaaccgggtccggttggcgtcctggccgcagctaattccgtgccggttctgctgtcagcccgtaccgaaaccgccctggcggcacaggcacgtctgctggaatctgcggtcgatgacagtgtgccgctgaccgcactggctagtgcgctggccaccggtcgtgcccatctgccgcgtcgcgcagctctgctggccggcgatcacgaacagctgcgtggtcaactgcgcgcagttgctCAAGGCCAGACACCTCCGGGAGCCGCGCGC	TGCATCGCGAGTTCCTCACGT	gcggtaccaacgcacatgtgattattgctgaaccgccggaaccggaaccgctgccggaaccgggtccggttggcgtcctggccgcagctaattccgtgccggttctgctgtcagcccgtaccgaaaccgccctggcggcacaggcacgtctgctggaatctgcggtcgatgacagtgtgccgctgaccgcactggctagtgcgctggccaccggtcgtgcccatctgccgcgtcgcgcagctctgctggccggcgatcacgaacagctgcgtggtcaactgcgcgcagttgctCAAGGCCAGACACCTCCGGGAGCCGCGCGCTGCATCGCGAGTTCCTCACGT	344	gcggtaccaacgcacatgtgattattgctgaaccgccggaaccggaaccgctgccggaaccgggtccggttggcgtcctggccgcagctaattccgtgccggttctgctgtcagcccgtaccgaaaccgccctggcggcacaggcacgtctgctggaatctgcggtcgatgacagtgtgccgctgaccgcactggctagtgcgctggccaccggtcgtgcccatctgccgcgtcgcgcagctctgctggccggcgatcacgaacagctgcgtggtcaactgcgcgcagttgctCAAGGCCAGACACCTCCGGGAGCCGCGCGCTGCATCGCGAGTTCCTCACGT
us91	F12	gcggtaccaacgcacatgtg	attattgctgaaccgccggaaccggaaccgctgccggaaccgggtccggttggcgtcctggccgcagctaattccgtgccggttctgctgtcagcccgtaccgaaaccgccctggcggcacaggcacgtctgctggaatctgcggtcgatgacagtgtgccgctgaccgcactggctagtgcgctggccaccggtcgtgcccatctgccgcgtcgcgcagctctgctggccggcgatcacgaacagctgcgtggtcaactgcgcgcagttGCCCAAGGCCAGACACCTCCGGGAGCCGCGCGC	TGCATCGCGAGTTCCTCACGT	gcggtaccaacgcacatgtgattattgctgaaccgccggaaccggaaccgctgccggaaccgggtccggttggcgtcctggccgcagctaattccgtgccggttctgctgtcagcccgtaccgaaaccgccctggcggcacaggcacgtctgctggaatctgcggtcgatgacagtgtgccgctgaccgcactggctagtgcgctggccaccggtcgtgcccatctgccgcgtcgcgcagctctgctggccggcgatcacgaacagctgcgtggtcaactgcgcgcagttGCCCAAGGCCAGACACCTCCGGGAGCCGCGCGCTGCATCGCGAGTTCCTCACGT	344	gcggtaccaacgcacatgtgattattgctgaaccgccggaaccggaaccgctgccggaaccgggtccggttggcgtcctggccgcagctaattccgtgccggttctgctgtcagcccgtaccgaaaccgccctggcggcacaggcacgtctgctggaatctgcggtcgatgacagtgtgccgctgaccgcactggctagtgcgctggccaccggtcgtgcccatctgccgcgtcgcgcagctctgctggccggcgatcacgaacagctgcgtggtcaactgcgcgcagttGCCCAAGGCCAGACACCTCCGGGAGCCGCGCGCTGCATCGCGAGTTCCTCACGT
us90	F13	gcggtaccaacgcacatgtg	attattgctgaaccgccggaaccggaaccgctgccggaaccgggtccggttggcgtcctggccgcagctaattccgtgccggttctgctgtcagcccgtaccgaaaccgccctggcggcacaggcacgtctgctggaatctgcggtcgatgacagtgtgccgctgaccgcactggctagtgcgctggccaccggtcgtgcccatctgccgcgtcgcgcagctctgctggccggcgatcacgaacagctgcgtggtcaactgcgcgcaGTAGCCCAAGGCCAGACACCTCCGGGAGCCGCGCGC	TGCATCGCGAGTTCCTCACGT	gcggtaccaacgcacatgtgattattgctgaaccgccggaaccggaaccgctgccggaaccgggtccggttggcgtcctggccgcagctaattccgtgccggttctgctgtcagcccgtaccgaaaccgccctggcggcacaggcacgtctgctggaatctgcggtcgatgacagtgtgccgctgaccgcactggctagtgcgctggccaccggtcgtgcccatctgccgcgtcgcgcagctctgctggccggcgatcacgaacagctgcgtggtcaactgcgcgcaGTAGCCCAAGGCCAGACACCTCCGGGAGCCGCGCGCTGCATCGCGAGTTCCTCACGT	344	gcggtaccaacgcacatgtgattattgctgaaccgccggaaccggaaccgctgccggaaccgggtccggttggcgtcctggccgcagctaattccgtgccggttctgctgtcagcccgtaccgaaaccgccctggcggcacaggcacgtctgctggaatctgcggtcgatgacagtgtgccgctgaccgcactggctagtgcgctggccaccggtcgtgcccatctgccgcgtcgcgcagctctgctggccggcgatcacgaacagctgcgtggtcaactgcgcgcaGTAGCCCAAGGCCAGACACCTCCGGGAGCCGCGCGCTGCATCGCGAGTTCCTCACGT
us89	F14	gcggtaccaacgcacatgtg	attattgctgaaccgccggaaccggaaccgctgccggaaccgggtccggttggcgtcctggccgcagctaattccgtgccggttctgctgtcagcccgtaccgaaaccgccctggcggcacaggcacgtctgctggaatctgcggtcgatgacagtgtgccgctgaccgcactggctagtgcgctggccaccggtcgtgcccatctgccgcgtcgcgcagctctgctggccggcgatcacgaacagctgcgtggtcaactgcgcGCCGTAGCCCAAGGCCAGACACCTCCGGGAGCCGCGCGC	TGCATCGCGAGTTCCTCACGT	gcggtaccaacgcacatgtgattattgctgaaccgccggaaccggaaccgctgccggaaccgggtccggttggcgtcctggccgcagctaattccgtgccggttctgctgtcagcccgtaccgaaaccgccctggcggcacaggcacgtctgctggaatctgcggtcgatgacagtgtgccgctgaccgcactggctagtgcgctggccaccggtcgtgcccatctgccgcgtcgcgcagctctgctggccggcgatcacgaacagctgcgtggtcaactgcgcGCCGTAGCCCAAGGCCAGACACCTCCGGGAGCCGCGCGCTGCATCGCGAGTTCCTCACGT	344	gcggtaccaacgcacatgtgattattgctgaaccgccggaaccggaaccgctgccggaaccgggtccggttggcgtcctggccgcagctaattccgtgccggttctgctgtcagcccgtaccgaaaccgccctggcggcacaggcacgtctgctggaatctgcggtcgatgacagtgtgccgctgaccgcactggctagtgcgctggccaccggtcgtgcccatctgccgcgtcgcgcagctctgctggccggcgatcacgaacagctgcgtggtcaactgcgcGCCGTAGCCCAAGGCCAGACACCTCCGGGAGCCGCGCGCTGCATCGCGAGTTCCTCACGT
us88	F15	gcggtaccaacgcacatgtg	attattgctgaaccgccggaaccggaaccgctgccggaaccgggtccggttggcgtcctggccgcagctaattccgtgccggttctgctgtcagcccgtaccgaaaccgccctggcggcacaggcacgtctgctggaatctgcggtcgatgacagtgtgccgctgaccgcactggctagtgcgctggccaccggtcgtgcccatctgccgcgtcgcgcagctctgctggccggcgatcacgaacagctgcgtggtcaactgTCCGCCGTAGCCCAAGGCCAGACACCTCCGGGAGCCGCGCGC	TGCATCGCGAGTTCCTCACGT	gcggtaccaacgcacatgtgattattgctgaaccgccggaaccggaaccgctgccggaaccgggtccggttggcgtcctggccgcagctaattccgtgccggttctgctgtcagcccgtaccgaaaccgccctggcggcacaggcacgtctgctggaatctgcggtcgatgacagtgtgccgctgaccgcactggctagtgcgctggccaccggtcgtgcccatctgccgcgtcgcgcagctctgctggccggcgatcacgaacagctgcgtggtcaactgTCCGCCGTAGCCCAAGGCCAGACACCTCCGGGAGCCGCGCGCTGCATCGCGAGTTCCTCACGT	344	gcggtaccaacgcacatgtgattattgctgaaccgccggaaccggaaccgctgccggaaccgggtccggttggcgtcctggccgcagctaattccgtgccggttctgctgtcagcccgtaccgaaaccgccctggcggcacaggcacgtctgctggaatctgcggtcgatgacagtgtgccgctgaccgcactggctagtgcgctggccaccggtcgtgcccatctgccgcgtcgcgcagctctgctggccggcgatcacgaacagctgcgtggtcaactgTCCGCCGTAGCCCAAGGCCAGACACCTCCGGGAGCCGCGCGCTGCATCGCGAGTTCCTCACGT
us87	F16	gcggtaccaacgcacatgtg	attattgctgaaccgccggaaccggaaccgctgccggaaccgggtccggttggcgtcctggccgcagctaattccgtgccggttctgctgtcagcccgtaccgaaaccgccctggcggcacaggcacgtctgctggaatctgcggtcgatgacagtgtgccgctgaccgcactggctagtgcgctggccaccggtcgtgcccatctgccgcgtcgcgcagctctgctggccggcgatcacgaacagctgcgtggtcaaTTGTCCGCCGTAGCCCAAGGCCAGACACCTCCGGGAGCCGCGCGC	TGCATCGCGAGTTCCTCACGT	gcggtaccaacgcacatgtgattattgctgaaccgccggaaccggaaccgctgccggaaccgggtccggttggcgtcctggccgcagctaattccgtgccggttctgctgtcagcccgtaccgaaaccgccctggcggcacaggcacgtctgctggaatctgcggtcgatgacagtgtgccgctgaccgcactggctagtgcgctggccaccggtcgtgcccatctgccgcgtcgcgcagctctgctggccggcgatcacgaacagctgcgtggtcaaTTGTCCGCCGTAGCCCAAGGCCAGACACCTCCGGGAGCCGCGCGCTGCATCGCGAGTTCCTCACGT	344	gcggtaccaacgcacatgtgattattgctgaaccgccggaaccggaaccgctgccggaaccgggtccggttggcgtcctggccgcagctaattccgtgccggttctgctgtcagcccgtaccgaaaccgccctggcggcacaggcacgtctgctggaatctgcggtcgatgacagtgtgccgctgaccgcactggctagtgcgctggccaccggtcgtgcccatctgccgcgtcgcgcagctctgctggccggcgatcacgaacagctgcgtggtcaaTTGTCCGCCGTAGCCCAAGGCCAGACACCTCCGGGAGCCGCGCGCTGCATCGCGAGTTCCTCACGT
us86	F17	gcggtaccaacgcacatgtg	attattgctgaaccgccggaaccggaaccgctgccggaaccgggtccggttggcgtcctggccgcagctaattccgtgccggttctgctgtcagcccgtaccgaaaccgccctggcggcacaggcacgtctgctggaatctgcggtcgatgacagtgtgccgctgaccgcactggctagtgcgctggccaccggtcgtgcccatctgccgcgtcgcgcagctctgctggccggcgatcacgaacagctgcgtggtGCTTTGTCCGCCGTAGCCCAAGGCCAGACACCTCCGGGAGCCGCGCGC	TGCATCGCGAGTTCCTCACGT	gcggtaccaacgcacatgtgattattgctgaaccgccggaaccggaaccgctgccggaaccgggtccggttggcgtcctggccgcagctaattccgtgccggttctgctgtcagcccgtaccgaaaccgccctggcggcacaggcacgtctgctggaatctgcggtcgatgacagtgtgccgctgaccgcactggctagtgcgctggccaccggtcgtgcccatctgccgcgtcgcgcagctctgctggccggcgatcacgaacagctgcgtggtGCTTTGTCCGCCGTAGCCCAAGGCCAGACACCTCCGGGAGCCGCGCGCTGCATCGCGAGTTCCTCACGT	344	gcggtaccaacgcacatgtgattattgctgaaccgccggaaccggaaccgctgccggaaccgggtccggttggcgtcctggccgcagctaattccgtgccggttctgctgtcagcccgtaccgaaaccgccctggcggcacaggcacgtctgctggaatctgcggtcgatgacagtgtgccgctgaccgcactggctagtgcgctggccaccggtcgtgcccatctgccgcgtcgcgcagctctgctggccggcgatcacgaacagctgcgtggtGCTTTGTCCGCCGTAGCCCAAGGCCAGACACCTCCGGGAGCCGCGCGCTGCATCGCGAGTTCCTCACGT
us85	F18	gcggtaccaacgcacatgtg	attattgctgaaccgccggaaccggaaccgctgccggaaccgggtccggttggcgtcctggccgcagctaattccgtgccggttctgctgtcagcccgtaccgaaaccgccctggcggcacaggcacgtctgctggaatctgcggtcgatgacagtgtgccgctgaccgcactggctagtgcgctggccaccggtcgtgcccatctgccgcgtcgcgcagctctgctggccggcgatcacgaacagctgcgtGCCGCTTTGTCCGCCGTAGCCCAAGGCCAGACACCTCCGGGAGCCGCGCGC	TGCATCGCGAGTTCCTCACGT	gcggtaccaacgcacatgtgattattgctgaaccgccggaaccggaaccgctgccggaaccgggtccggttggcgtcctggccgcagctaattccgtgccggttctgctgtcagcccgtaccgaaaccgccctggcggcacaggcacgtctgctggaatctgcggtcgatgacagtgtgccgctgaccgcactggctagtgcgctggccaccggtcgtgcccatctgccgcgtcgcgcagctctgctggccggcgatcacgaacagctgcgtGCCGCTTTGTCCGCCGTAGCCCAAGGCCAGACACCTCCGGGAGCCGCGCGCTGCATCGCGAGTTCCTCACGT	344	gcggtaccaacgcacatgtgattattgctgaaccgccggaaccggaaccgctgccggaaccgggtccggttggcgtcctggccgcagctaattccgtgccggttctgctgtcagcccgtaccgaaaccgccctggcggcacaggcacgtctgctggaatctgcggtcgatgacagtgtgccgctgaccgcactggctagtgcgctggccaccggtcgtgcccatctgccgcgtcgcgcagctctgctggccggcgatcacgaacagctgcgtGCCGCTTTGTCCGCCGTAGCCCAAGGCCAGACACCTCCGGGAGCCGCGCGCTGCATCGCGAGTTCCTCACGT
us84	F19	gcggtaccaacgcacatgtg	attattgctgaaccgccggaaccggaaccgctgccggaaccgggtccggttggcgtcctggccgcagctaattccgtgccggttctgctgtcagcccgtaccgaaaccgccctggcggcacaggcacgtctgctggaatctgcggtcgatgacagtgtgccgctgaccgcactggctagtgcgctggccaccggtcgtgcccatctgccgcgtcgcgcagctctgctggccggcgatcacgaacagctgCTGGCCGCTTTGTCCGCCGTAGCCCAAGGCCAGACACCTCCGGGAGCCGCGCGC	TGCATCGCGAGTTCCTCACGT	gcggtaccaacgcacatgtgattattgctgaaccgccggaaccggaaccgctgccggaaccgggtccggttggcgtcctggccgcagctaattccgtgccggttctgctgtcagcccgtaccgaaaccgccctggcggcacaggcacgtctgctggaatctgcggtcgatgacagtgtgccgctgaccgcactggctagtgcgctggccaccggtcgtgcccatctgccgcgtcgcgcagctctgctggccggcgatcacgaacagctgCTGGCCGCTTTGTCCGCCGTAGCCCAAGGCCAGACACCTCCGGGAGCCGCGCGCTGCATCGCGAGTTCCTCACGT	344	gcggtaccaacgcacatgtgattattgctgaaccgccggaaccggaaccgctgccggaaccgggtccggttggcgtcctggccgcagctaattccgtgccggttctgctgtcagcccgtaccgaaaccgccctggcggcacaggcacgtctgctggaatctgcggtcgatgacagtgtgccgctgaccgcactggctagtgcgctggccaccggtcgtgcccatctgccgcgtcgcgcagctctgctggccggcgatcacgaacagctgCTGGCCGCTTTGTCCGCCGTAGCCCAAGGCCAGACACCTCCGGGAGCCGCGCGCTGCATCGCGAGTTCCTCACGT
us83	F20	gcggtaccaacgcacatgtg	attattgctgaaccgccggaaccggaaccgctgccggaaccgggtccggttggcgtcctggccgcagctaattccgtgccggttctgctgtcagcccgtaccgaaaccgccctggcggcacaggcacgtctgctggaatctgcggtcgatgacagtgtgccgctgaccgcactggctagtgcgctggccaccggtcgtgcccatctgccgcgtcgcgcagctctgctggccggcgatcacgaacagCTTCTGGCCGCTTTGTCCGCCGTAGCCCAAGGCCAGACACCTCCGGGAGCCGCGCGC	TGCATCGCGAGTTCCTCACGT	gcggtaccaacgcacatgtgattattgctgaaccgccggaaccggaaccgctgccggaaccgggtccggttggcgtcctggccgcagctaattccgtgccggttctgctgtcagcccgtaccgaaaccgccctggcggcacaggcacgtctgctggaatctgcggtcgatgacagtgtgccgctgaccgcactggctagtgcgctggccaccggtcgtgcccatctgccgcgtcgcgcagctctgctggccggcgatcacgaacagCTTCTGGCCGCTTTGTCCGCCGTAGCCCAAGGCCAGACACCTCCGGGAGCCGCGCGCTGCATCGCGAGTTCCTCACGT	344	gcggtaccaacgcacatgtgattattgctgaaccgccggaaccggaaccgctgccggaaccgggtccggttggcgtcctggccgcagctaattccgtgccggttctgctgtcagcccgtaccgaaaccgccctggcggcacaggcacgtctgctggaatctgcggtcgatgacagtgtgccgctgaccgcactggctagtgcgctggccaccggtcgtgcccatctgccgcgtcgcgcagctctgctggccggcgatcacgaacagCTTCTGGCCGCTTTGTCCGCCGTAGCCCAAGGCCAGACACCTCCGGGAGCCGCGCGCTGCATCGCGAGTTCCTCACGT
us82	F21	gcggtaccaacgcacatgtg	attattgctgaaccgccggaaccggaaccgctgccggaaccgggtccggttggcgtcctggccgcagctaattccgtgccggttctgctgtcagcccgtaccgaaaccgccctggcggcacaggcacgtctgctggaatctgcggtcgatgacagtgtgccgctgaccgcactggctagtgcgctggccaccggtcgtgcccatctgccgcgtcgcgcagctctgctggccggcgatcacgaaGGACTTCTGGCCGCTTTGTCCGCCGTAGCCCAAGGCCAGACACCTCCGGGAGCCGCGCGC	TGCATCGCGAGTTCCTCACGT	gcggtaccaacgcacatgtgattattgctgaaccgccggaaccggaaccgctgccggaaccgggtccggttggcgtcctggccgcagctaattccgtgccggttctgctgtcagcccgtaccgaaaccgccctggcggcacaggcacgtctgctggaatctgcggtcgatgacagtgtgccgctgaccgcactggctagtgcgctggccaccggtcgtgcccatctgccgcgtcgcgcagctctgctggccggcgatcacgaaGGACTTCTGGCCGCTTTGTCCGCCGTAGCCCAAGGCCAGACACCTCCGGGAGCCGCGCGCTGCATCGCGAGTTCCTCACGT	344	gcggtaccaacgcacatgtgattattgctgaaccgccggaaccggaaccgctgccggaaccgggtccggttggcgtcctggccgcagctaattccgtgccggttctgctgtcagcccgtaccgaaaccgccctggcggcacaggcacgtctgctggaatctgcggtcgatgacagtgtgccgctgaccgcactggctagtgcgctggccaccggtcgtgcccatctgccgcgtcgcgcagctctgctggccggcgatcacgaaGGACTTCTGGCCGCTTTGTCCGCCGTAGCCCAAGGCCAGACACCTCCGGGAGCCGCGCGCTGCATCGCGAGTTCCTCACGT
us81	F22	gcggtaccaacgcacatgtg	attattgctgaaccgccggaaccggaaccgctgccggaaccgggtccggttggcgtcctggccgcagctaattccgtgccggttctgctgtcagcccgtaccgaaaccgccctggcggcacaggcacgtctgctggaatctgcggtcgatgacagtgtgccgctgaccgcactggctagtgcgctggccaccggtcgtgcccatctgccgcgtcgcgcagctctgctggccggcgatcacGAAGGACTTCTGGCCGCTTTGTCCGCCGTAGCCCAAGGCCAGACACCTCCGGGAGCCGCGCGC	TGCATCGCGAGTTCCTCACGT	gcggtaccaacgcacatgtgattattgctgaaccgccggaaccggaaccgctgccggaaccgggtccggttggcgtcctggccgcagctaattccgtgccggttctgctgtcagcccgtaccgaaaccgccctggcggcacaggcacgtctgctggaatctgcggtcgatgacagtgtgccgctgaccgcactggctagtgcgctggccaccggtcgtgcccatctgccgcgtcgcgcagctctgctggccggcgatcacGAAGGACTTCTGGCCGCTTTGTCCGCCGTAGCCCAAGGCCAGACACCTCCGGGAGCCGCGCGCTGCATCGCGAGTTCCTCACGT	344	gcggtaccaacgcacatgtgattattgctgaaccgccggaaccggaaccgctgccggaaccgggtccggttggcgtcctggccgcagctaattccgtgccggttctgctgtcagcccgtaccgaaaccgccctggcggcacaggcacgtctgctggaatctgcggtcgatgacagtgtgccgctgaccgcactggctagtgcgctggccaccggtcgtgcccatctgccgcgtcgcgcagctctgctggccggcgatcacGAAGGACTTCTGGCCGCTTTGTCCGCCGTAGCCCAAGGCCAGACACCTCCGGGAGCCGCGCGCTGCATCGCGAGTTCCTCACGT
us80	F23	gcggtaccaacgcacatgtg	attattgctgaaccgccggaaccggaaccgctgccggaaccgggtccggttggcgtcctggccgcagctaattccgtgccggttctgctgtcagcccgtaccgaaaccgccctggcggcacaggcacgtctgctggaatctgcggtcgatgacagtgtgccgctgaccgcactggctagtgcgctggccaccggtcgtgcccatctgccgcgtcgcgcagctctgctggccggcgatCGCGAAGGACTTCTGGCCGCTTTGTCCGCCGTAGCCCAAGGCCAGACACCTCCGGGAGCCGCGCGC	TGCATCGCGAGTTCCTCACGT	gcggtaccaacgcacatgtgattattgctgaaccgccggaaccggaaccgctgccggaaccgggtccggttggcgtcctggccgcagctaattccgtgccggttctgctgtcagcccgtaccgaaaccgccctggcggcacaggcacgtctgctggaatctgcggtcgatgacagtgtgccgctgaccgcactggctagtgcgctggccaccggtcgtgcccatctgccgcgtcgcgcagctctgctggccggcgatCGCGAAGGACTTCTGGCCGCTTTGTCCGCCGTAGCCCAAGGCCAGACACCTCCGGGAGCCGCGCGCTGCATCGCGAGTTCCTCACGT	344	gcggtaccaacgcacatgtgattattgctgaaccgccggaaccggaaccgctgccggaaccgggtccggttggcgtcctggccgcagctaattccgtgccggttctgctgtcagcccgtaccgaaaccgccctggcggcacaggcacgtctgctggaatctgcggtcgatgacagtgtgccgctgaccgcactggctagtgcgctggccaccggtcgtgcccatctgccgcgtcgcgcagctctgctggccggcgatCGCGAAGGACTTCTGGCCGCTTTGTCCGCCGTAGCCCAAGGCCAGACACCTCCGGGAGCCGCGCGCTGCATCGCGAGTTCCTCACGT
us79	F24	gcggtaccaacgcacatgtg	attattgctgaaccgccggaaccggaaccgctgccggaaccgggtccggttggcgtcctggccgcagctaattccgtgccggttctgctgtcagcccgtaccgaaaccgccctggcggcacaggcacgtctgctggaatctgcggtcgatgacagtgtgccgctgaccgcactggctagtgcgctggccaccggtcgtgcccatctgccgcgtcgcgcagctctgctggccggcTCGCGCGAAGGACTTCTGGCCGCTTTGTCCGCCGTAGCCCAAGGCCAGACACCTCCGGGAGCCGCGCGC	TGCATCGCGAGTTCCTCACGT	gcggtaccaacgcacatgtgattattgctgaaccgccggaaccggaaccgctgccggaaccgggtccggttggcgtcctggccgcagctaattccgtgccggttctgctgtcagcccgtaccgaaaccgccctggcggcacaggcacgtctgctggaatctgcggtcgatgacagtgtgccgctgaccgcactggctagtgcgctggccaccggtcgtgcccatctgccgcgtcgcgcagctctgctggccggcTCGCGCGAAGGACTTCTGGCCGCTTTGTCCGCCGTAGCCCAAGGCCAGACACCTCCGGGAGCCGCGCGCTGCATCGCGAGTTCCTCACGT	344	gcggtaccaacgcacatgtgattattgctgaaccgccggaaccggaaccgctgccggaaccgggtccggttggcgtcctggccgcagctaattccgtgccggttctgctgtcagcccgtaccgaaaccgccctggcggcacaggcacgtctgctggaatctgcggtcgatgacagtgtgccgctgaccgcactggctagtgcgctggccaccggtcgtgcccatctgccgcgtcgcgcagctctgctggccggcTCGCGCGAAGGACTTCTGGCCGCTTTGTCCGCCGTAGCCCAAGGCCAGACACCTCCGGGAGCCGCGCGCTGCATCGCGAGTTCCTCACGT
us78	F25	gcggtaccaacgcacatgtg	attattgctgaaccgccggaaccggaaccgctgccggaaccgggtccggttggcgtcctggccgcagctaattccgtgccggttctgctgtcagcccgtaccgaaaccgccctggcggcacaggcacgtctgctggaatctgcggtcgatgacagtgtgccgctgaccgcactggctagtgcgctggccaccggtcgtgcccatctgccgcgtcgcgcagctctgctggccACATCGCGCGAAGGACTTCTGGCCGCTTTGTCCGCCGTAGCCCAAGGCCAGACACCTCCGGGAGCCGCGCGC	TGCATCGCGAGTTCCTCACGT	gcggtaccaacgcacatgtgattattgctgaaccgccggaaccggaaccgctgccggaaccgggtccggttggcgtcctggccgcagctaattccgtgccggttctgctgtcagcccgtaccgaaaccgccctggcggcacaggcacgtctgctggaatctgcggtcgatgacagtgtgccgctgaccgcactggctagtgcgctggccaccggtcgtgcccatctgccgcgtcgcgcagctctgctggccACATCGCGCGAAGGACTTCTGGCCGCTTTGTCCGCCGTAGCCCAAGGCCAGACACCTCCGGGAGCCGCGCGCTGCATCGCGAGTTCCTCACGT	344	gcggtaccaacgcacatgtgattattgctgaaccgccggaaccggaaccgctgccggaaccgggtccggttggcgtcctggccgcagctaattccgtgccggttctgctgtcagcccgtaccgaaaccgccctggcggcacaggcacgtctgctggaatctgcggtcgatgacagtgtgccgctgaccgcactggctagtgcgctggccaccggtcgtgcccatctgccgcgtcgcgcagctctgctggccACATCGCGCGAAGGACTTCTGGCCGCTTTGTCCGCCGTAGCCCAAGGCCAGACACCTCCGGGAGCCGCGCGCTGCATCGCGAGTTCCTCACGT
us77	F26	gcggtaccaacgcacatgtg	attattgctgaaccgccggaaccggaaccgctgccggaaccgggtccggttggcgtcctggccgcagctaattccgtgccggttctgctgtcagcccgtaccgaaaccgccctggcggcacaggcacgtctgctggaatctgcggtcgatgacagtgtgccgctgaccgcactggctagtgcgctggccaccggtcgtgcccatctgccgcgtcgcgcagctctgctgGTCACATCGCGCGAAGGACTTCTGGCCGCTTTGTCCGCCGTAGCCCAAGGCCAGACACCTCCGGGAGCCGCGCGC	TGCATCGCGAGTTCCTCACGT	gcggtaccaacgcacatgtgattattgctgaaccgccggaaccggaaccgctgccggaaccgggtccggttggcgtcctggccgcagctaattccgtgccggttctgctgtcagcccgtaccgaaaccgccctggcggcacaggcacgtctgctggaatctgcggtcgatgacagtgtgccgctgaccgcactggctagtgcgctggccaccggtcgtgcccatctgccgcgtcgcgcagctctgctgGTCACATCGCGCGAAGGACTTCTGGCCGCTTTGTCCGCCGTAGCCCAAGGCCAGACACCTCCGGGAGCCGCGCGCTGCATCGCGAGTTCCTCACGT	344	gcggtaccaacgcacatgtgattattgctgaaccgccggaaccggaaccgctgccggaaccgggtccggttggcgtcctggccgcagctaattccgtgccggttctgctgtcagcccgtaccgaaaccgccctggcggcacaggcacgtctgctggaatctgcggtcgatgacagtgtgccgctgaccgcactggctagtgcgctggccaccggtcgtgcccatctgccgcgtcgcgcagctctgctgGTCACATCGCGCGAAGGACTTCTGGCCGCTTTGTCCGCCGTAGCCCAAGGCCAGACACCTCCGGGAGCCGCGCGCTGCATCGCGAGTTCCTCACGT
us76	F27	gcggtaccaacgcacatgtg	attattgctgaaccgccggaaccggaaccgctgccggaaccgggtccggttggcgtcctggccgcagctaattccgtgccggttctgctgtcagcccgtaccgaaaccgccctggcggcacaggcacgtctgctggaatctgcggtcgatgacagtgtgccgctgaccgcactggctagtgcgctggccaccggtcgtgcccatctgccgcgtcgcgcagctctgGCTGTCACATCGCGCGAAGGACTTCTGGCCGCTTTGTCCGCCGTAGCCCAAGGCCAGACACCTCCGGGAGCCGCGCGC	TGCATCGCGAGTTCCTCACGT	gcggtaccaacgcacatgtgattattgctgaaccgccggaaccggaaccgctgccggaaccgggtccggttggcgtcctggccgcagctaattccgtgccggttctgctgtcagcccgtaccgaaaccgccctggcggcacaggcacgtctgctggaatctgcggtcgatgacagtgtgccgctgaccgcactggctagtgcgctggccaccggtcgtgcccatctgccgcgtcgcgcagctctgGCTGTCACATCGCGCGAAGGACTTCTGGCCGCTTTGTCCGCCGTAGCCCAAGGCCAGACACCTCCGGGAGCCGCGCGCTGCATCGCGAGTTCCTCACGT	344	gcggtaccaacgcacatgtgattattgctgaaccgccggaaccggaaccgctgccggaaccgggtccggttggcgtcctggccgcagctaattccgtgccggttctgctgtcagcccgtaccgaaaccgccctggcggcacaggcacgtctgctggaatctgcggtcgatgacagtgtgccgctgaccgcactggctagtgcgctggccaccggtcgtgcccatctgccgcgtcgcgcagctctgGCTGTCACATCGCGCGAAGGACTTCTGGCCGCTTTGTCCGCCGTAGCCCAAGGCCAGACACCTCCGGGAGCCGCGCGCTGCATCGCGAGTTCCTCACGT
us75	F28	gcggtaccaacgcacatgtg	attattgctgaaccgccggaaccggaaccgctgccggaaccgggtccggttggcgtcctggccgcagctaattccgtgccggttctgctgtcagcccgtaccgaaaccgccctggcggcacaggcacgtctgctggaatctgcggtcgatgacagtgtgccgctgaccgcactggctagtgcgctggccaccggtcgtgcccatctgccgcgtcgcgcagctGTAGCTGTCACATCGCGCGAAGGACTTCTGGCCGCTTTGTCCGCCGTAGCCCAAGGCCAGACACCTCCGGGAGCCGCGCGC	TGCATCGCGAGTTCCTCACGT	gcggtaccaacgcacatgtgattattgctgaaccgccggaaccggaaccgctgccggaaccgggtccggttggcgtcctggccgcagctaattccgtgccggttctgctgtcagcccgtaccgaaaccgccctggcggcacaggcacgtctgctggaatctgcggtcgatgacagtgtgccgctgaccgcactggctagtgcgctggccaccggtcgtgcccatctgccgcgtcgcgcagctGTAGCTGTCACATCGCGCGAAGGACTTCTGGCCGCTTTGTCCGCCGTAGCCCAAGGCCAGACACCTCCGGGAGCCGCGCGCTGCATCGCGAGTTCCTCACGT	344	gcggtaccaacgcacatgtgattattgctgaaccgccggaaccggaaccgctgccggaaccgggtccggttggcgtcctggccgcagctaattccgtgccggttctgctgtcagcccgtaccgaaaccgccctggcggcacaggcacgtctgctggaatctgcggtcgatgacagtgtgccgctgaccgcactggctagtgcgctggccaccggtcgtgcccatctgccgcgtcgcgcagctGTAGCTGTCACATCGCGCGAAGGACTTCTGGCCGCTTTGTCCGCCGTAGCCCAAGGCCAGACACCTCCGGGAGCCGCGCGCTGCATCGCGAGTTCCTCACGT
us74	F29	gcggtaccaacgcacatgtg	attattgctgaaccgccggaaccggaaccgctgccggaaccgggtccggttggcgtcctggccgcagctaattccgtgccggttctgctgtcagcccgtaccgaaaccgccctggcggcacaggcacgtctgctggaatctgcggtcgatgacagtgtgccgctgaccgcactggctagtgcgctggccaccggtcgtgcccatctgccgcgtcgcgcaGCGGTAGCTGTCACATCGCGCGAAGGACTTCTGGCCGCTTTGTCCGCCGTAGCCCAAGGCCAGACACCTCCGGGAGCCGCGCGC	TGCATCGCGAGTTCCTCACGT	gcggtaccaacgcacatgtgattattgctgaaccgccggaaccggaaccgctgccggaaccgggtccggttggcgtcctggccgcagctaattccgtgccggttctgctgtcagcccgtaccgaaaccgccctggcggcacaggcacgtctgctggaatctgcggtcgatgacagtgtgccgctgaccgcactggctagtgcgctggccaccggtcgtgcccatctgccgcgtcgcgcaGCGGTAGCTGTCACATCGCGCGAAGGACTTCTGGCCGCTTTGTCCGCCGTAGCCCAAGGCCAGACACCTCCGGGAGCCGCGCGCTGCATCGCGAGTTCCTCACGT	344	gcggtaccaacgcacatgtgattattgctgaaccgccggaaccggaaccgctgccggaaccgggtccggttggcgtcctggccgcagctaattccgtgccggttctgctgtcagcccgtaccgaaaccgccctggcggcacaggcacgtctgctggaatctgcggtcgatgacagtgtgccgctgaccgcactggctagtgcgctggccaccggtcgtgcccatctgccgcgtcgcgcaGCGGTAGCTGTCACATCGCGCGAAGGACTTCTGGCCGCTTTGTCCGCCGTAGCCCAAGGCCAGACACCTCCGGGAGCCGCGCGCTGCATCGCGAGTTCCTCACGT
us73	F30	gcggtaccaacgcacatgtg	attattgctgaaccgccggaaccggaaccgctgccggaaccgggtccggttggcgtcctggccgcagctaattccgtgccggttctgctgtcagcccgtaccgaaaccgccctggcggcacaggcacgtctgctggaatctgcggtcgatgacagtgtgccgctgaccgcactggctagtgcgctggccaccggtcgtgcccatctgccgcgtcgcTTAGCGGTAGCTGTCACATCGCGCGAAGGACTTCTGGCCGCTTTGTCCGCCGTAGCCCAAGGCCAGACACCTCCGGGAGCCGCGCGC	TGCATCGCGAGTTCCTCACGT	gcggtaccaacgcacatgtgattattgctgaaccgccggaaccggaaccgctgccggaaccgggtccggttggcgtcctggccgcagctaattccgtgccggttctgctgtcagcccgtaccgaaaccgccctggcggcacaggcacgtctgctggaatctgcggtcgatgacagtgtgccgctgaccgcactggctagtgcgctggccaccggtcgtgcccatctgccgcgtcgcTTAGCGGTAGCTGTCACATCGCGCGAAGGACTTCTGGCCGCTTTGTCCGCCGTAGCCCAAGGCCAGACACCTCCGGGAGCCGCGCGCTGCATCGCGAGTTCCTCACGT	344	gcggtaccaacgcacatgtgattattgctgaaccgccggaaccggaaccgctgccggaaccgggtccggttggcgtcctggccgcagctaattccgtgccggttctgctgtcagcccgtaccgaaaccgccctggcggcacaggcacgtctgctggaatctgcggtcgatgacagtgtgccgctgaccgcactggctagtgcgctggccaccggtcgtgcccatctgccgcgtcgcTTAGCGGTAGCTGTCACATCGCGCGAAGGACTTCTGGCCGCTTTGTCCGCCGTAGCCCAAGGCCAGACACCTCCGGGAGCCGCGCGCTGCATCGCGAGTTCCTCACGT
us72	F31	gcggtaccaacgcacatgtg	attattgctgaaccgccggaaccggaaccgctgccggaaccgggtccggttggcgtcctggccgcagctaattccgtgccggttctgctgtcagcccgtaccgaaaccgccctggcggcacaggcacgtctgctggaatctgcggtcgatgacagtgtgccgctgaccgcactggctagtgcgctggccaccggtcgtgcccatctgccgcgtCGTTTAGCGGTAGCTGTCACATCGCGCGAAGGACTTCTGGCCGCTTTGTCCGCCGTAGCCCAAGGCCAGACACCTCCGGGAGCCGCGCGC	TGCATCGCGAGTTCCTCACGT	gcggtaccaacgcacatgtgattattgctgaaccgccggaaccggaaccgctgccggaaccgggtccggttggcgtcctggccgcagctaattccgtgccggttctgctgtcagcccgtaccgaaaccgccctggcggcacaggcacgtctgctggaatctgcggtcgatgacagtgtgccgctgaccgcactggctagtgcgctggccaccggtcgtgcccatctgccgcgtCGTTTAGCGGTAGCTGTCACATCGCGCGAAGGACTTCTGGCCGCTTTGTCCGCCGTAGCCCAAGGCCAGACACCTCCGGGAGCCGCGCGCTGCATCGCGAGTTCCTCACGT	344	gcggtaccaacgcacatgtgattattgctgaaccgccggaaccggaaccgctgccggaaccgggtccggttggcgtcctggccgcagctaattccgtgccggttctgctgtcagcccgtaccgaaaccgccctggcggcacaggcacgtctgctggaatctgcggtcgatgacagtgtgccgctgaccgcactggctagtgcgctggccaccggtcgtgcccatctgccgcgtCGTTTAGCGGTAGCTGTCACATCGCGCGAAGGACTTCTGGCCGCTTTGTCCGCCGTAGCCCAAGGCCAGACACCTCCGGGAGCCGCGCGCTGCATCGCGAGTTCCTCACGT
us71	F32	gcggtaccaacgcacatgtg	attattgctgaaccgccggaaccggaaccgctgccggaaccgggtccggttggcgtcctggccgcagctaattccgtgccggttctgctgtcagcccgtaccgaaaccgccctggcggcacaggcacgtctgctggaatctgcggtcgatgacagtgtgccgctgaccgcactggctagtgcgctggccaccggtcgtgcccatctgccgCACCGTTTAGCGGTAGCTGTCACATCGCGCGAAGGACTTCTGGCCGCTTTGTCCGCCGTAGCCCAAGGCCAGACACCTCCGGGAGCCGCGCGC	TGCATCGCGAGTTCCTCACGT	gcggtaccaacgcacatgtgattattgctgaaccgccggaaccggaaccgctgccggaaccgggtccggttggcgtcctggccgcagctaattccgtgccggttctgctgtcagcccgtaccgaaaccgccctggcggcacaggcacgtctgctggaatctgcggtcgatgacagtgtgccgctgaccgcactggctagtgcgctggccaccggtcgtgcccatctgccgCACCGTTTAGCGGTAGCTGTCACATCGCGCGAAGGACTTCTGGCCGCTTTGTCCGCCGTAGCCCAAGGCCAGACACCTCCGGGAGCCGCGCGCTGCATCGCGAGTTCCTCACGT	344	gcggtaccaacgcacatgtgattattgctgaaccgccggaaccggaaccgctgccggaaccgggtccggttggcgtcctggccgcagctaattccgtgccggttctgctgtcagcccgtaccgaaaccgccctggcggcacaggcacgtctgctggaatctgcggtcgatgacagtgtgccgctgaccgcactggctagtgcgctggccaccggtcgtgcccatctgccgCACCGTTTAGCGGTAGCTGTCACATCGCGCGAAGGACTTCTGGCCGCTTTGTCCGCCGTAGCCCAAGGCCAGACACCTCCGGGAGCCGCGCGCTGCATCGCGAGTTCCTCACGT
us70	F33	gcggtaccaacgcacatgtg	attattgctgaaccgccggaaccggaaccgctgccggaaccgggtccggttggcgtcctggccgcagctaattccgtgccggttctgctgtcagcccgtaccgaaaccgccctggcggcacaggcacgtctgctggaatctgcggtcgatgacagtgtgccgctgaccgcactggctagtgcgctggccaccggtcgtgcccatctgAACCACCGTTTAGCGGTAGCTGTCACATCGCGCGAAGGACTTCTGGCCGCTTTGTCCGCCGTAGCCCAAGGCCAGACACCTCCGGGAGCCGCGCGC	TGCATCGCGAGTTCCTCACGT	gcggtaccaacgcacatgtgattattgctgaaccgccggaaccggaaccgctgccggaaccgggtccggttggcgtcctggccgcagctaattccgtgccggttctgctgtcagcccgtaccgaaaccgccctggcggcacaggcacgtctgctggaatctgcggtcgatgacagtgtgccgctgaccgcactggctagtgcgctggccaccggtcgtgcccatctgAACCACCGTTTAGCGGTAGCTGTCACATCGCGCGAAGGACTTCTGGCCGCTTTGTCCGCCGTAGCCCAAGGCCAGACACCTCCGGGAGCCGCGCGCTGCATCGCGAGTTCCTCACGT	344	gcggtaccaacgcacatgtgattattgctgaaccgccggaaccggaaccgctgccggaaccgggtccggttggcgtcctggccgcagctaattccgtgccggttctgctgtcagcccgtaccgaaaccgccctggcggcacaggcacgtctgctggaatctgcggtcgatgacagtgtgccgctgaccgcactggctagtgcgctggccaccggtcgtgcccatctgAACCACCGTTTAGCGGTAGCTGTCACATCGCGCGAAGGACTTCTGGCCGCTTTGTCCGCCGTAGCCCAAGGCCAGACACCTCCGGGAGCCGCGCGCTGCATCGCGAGTTCCTCACGT
us69	F34	gcggtaccaacgcacatgtg	attattgctgaaccgccggaaccggaaccgctgccggaaccgggtccggttggcgtcctggccgcagctaattccgtgccggttctgctgtcagcccgtaccgaaaccgccctggcggcacaggcacgtctgctggaatctgcggtcgatgacagtgtgccgctgaccgcactggctagtgcgctggccaccggtcgtgcccatATGAACCACCGTTTAGCGGTAGCTGTCACATCGCGCGAAGGACTTCTGGCCGCTTTGTCCGCCGTAGCCCAAGGCCAGACACCTCCGGGAGCCGCGCGC	TGCATCGCGAGTTCCTCACGT	gcggtaccaacgcacatgtgattattgctgaaccgccggaaccggaaccgctgccggaaccgggtccggttggcgtcctggccgcagctaattccgtgccggttctgctgtcagcccgtaccgaaaccgccctggcggcacaggcacgtctgctggaatctgcggtcgatgacagtgtgccgctgaccgcactggctagtgcgctggccaccggtcgtgcccatATGAACCACCGTTTAGCGGTAGCTGTCACATCGCGCGAAGGACTTCTGGCCGCTTTGTCCGCCGTAGCCCAAGGCCAGACACCTCCGGGAGCCGCGCGCTGCATCGCGAGTTCCTCACGT	344	gcggtaccaacgcacatgtgattattgctgaaccgccggaaccggaaccgctgccggaaccgggtccggttggcgtcctggccgcagctaattccgtgccggttctgctgtcagcccgtaccgaaaccgccctggcggcacaggcacgtctgctggaatctgcggtcgatgacagtgtgccgctgaccgcactggctagtgcgctggccaccggtcgtgcccatATGAACCACCGTTTAGCGGTAGCTGTCACATCGCGCGAAGGACTTCTGGCCGCTTTGTCCGCCGTAGCCCAAGGCCAGACACCTCCGGGAGCCGCGCGCTGCATCGCGAGTTCCTCACGT
us68	F35	gcggtaccaacgcacatgtg	attattgctgaaccgccggaaccggaaccgctgccggaaccgggtccggttggcgtcctggccgcagctaattccgtgccggttctgctgtcagcccgtaccgaaaccgccctggcggcacaggcacgtctgctggaatctgcggtcgatgacagtgtgccgctgaccgcactggctagtgcgctggccaccggtcgtgccGCTATGAACCACCGTTTAGCGGTAGCTGTCACATCGCGCGAAGGACTTCTGGCCGCTTTGTCCGCCGTAGCCCAAGGCCAGACACCTCCGGGAGCCGCGCGC	TGCATCGCGAGTTCCTCACGT	gcggtaccaacgcacatgtgattattgctgaaccgccggaaccggaaccgctgccggaaccgggtccggttggcgtcctggccgcagctaattccgtgccggttctgctgtcagcccgtaccgaaaccgccctggcggcacaggcacgtctgctggaatctgcggtcgatgacagtgtgccgctgaccgcactggctagtgcgctggccaccggtcgtgccGCTATGAACCACCGTTTAGCGGTAGCTGTCACATCGCGCGAAGGACTTCTGGCCGCTTTGTCCGCCGTAGCCCAAGGCCAGACACCTCCGGGAGCCGCGCGCTGCATCGCGAGTTCCTCACGT	344	gcggtaccaacgcacatgtgattattgctgaaccgccggaaccggaaccgctgccggaaccgggtccggttggcgtcctggccgcagctaattccgtgccggttctgctgtcagcccgtaccgaaaccgccctggcggcacaggcacgtctgctggaatctgcggtcgatgacagtgtgccgctgaccgcactggctagtgcgctggccaccggtcgtgccGCTATGAACCACCGTTTAGCGGTAGCTGTCACATCGCGCGAAGGACTTCTGGCCGCTTTGTCCGCCGTAGCCCAAGGCCAGACACCTCCGGGAGCCGCGCGCTGCATCGCGAGTTCCTCACGT
us67	F36	gcggtaccaacgcacatgtg	attattgctgaaccgccggaaccggaaccgctgccggaaccgggtccggttggcgtcctggccgcagctaattccgtgccggttctgctgtcagcccgtaccgaaaccgccctggcggcacaggcacgtctgctggaatctgcggtcgatgacagtgtgccgctgaccgcactggctagtgcgctggccaccggtcgtTCAGCTATGAACCACCGTTTAGCGGTAGCTGTCACATCGCGCGAAGGACTTCTGGCCGCTTTGTCCGCCGTAGCCCAAGGCCAGACACCTCCGGGAGCCGCGCGC	TGCATCGCGAGTTCCTCACGT	gcggtaccaacgcacatgtgattattgctgaaccgccggaaccggaaccgctgccggaaccgggtccggttggcgtcctggccgcagctaattccgtgccggttctgctgtcagcccgtaccgaaaccgccctggcggcacaggcacgtctgctggaatctgcggtcgatgacagtgtgccgctgaccgcactggctagtgcgctggccaccggtcgtTCAGCTATGAACCACCGTTTAGCGGTAGCTGTCACATCGCGCGAAGGACTTCTGGCCGCTTTGTCCGCCGTAGCCCAAGGCCAGACACCTCCGGGAGCCGCGCGCTGCATCGCGAGTTCCTCACGT	344	gcggtaccaacgcacatgtgattattgctgaaccgccggaaccggaaccgctgccggaaccgggtccggttggcgtcctggccgcagctaattccgtgccggttctgctgtcagcccgtaccgaaaccgccctggcggcacaggcacgtctgctggaatctgcggtcgatgacagtgtgccgctgaccgcactggctagtgcgctggccaccggtcgtTCAGCTATGAACCACCGTTTAGCGGTAGCTGTCACATCGCGCGAAGGACTTCTGGCCGCTTTGTCCGCCGTAGCCCAAGGCCAGACACCTCCGGGAGCCGCGCGCTGCATCGCGAGTTCCTCACGT
us66	F37	gcggtaccaacgcacatgtg	attattgctgaaccgccggaaccggaaccgctgccggaaccgggtccggttggcgtcctggccgcagctaattccgtgccggttctgctgtcagcccgtaccgaaaccgccctggcggcacaggcacgtctgctggaatctgcggtcgatgacagtgtgccgctgaccgcactggctagtgcgctggccaccggtCGCTCAGCTATGAACCACCGTTTAGCGGTAGCTGTCACATCGCGCGAAGGACTTCTGGCCGCTTTGTCCGCCGTAGCCCAAGGCCAGACACCTCCGGGAGCCGCGCGC	TGCATCGCGAGTTCCTCACGT	gcggtaccaacgcacatgtgattattgctgaaccgccggaaccggaaccgctgccggaaccgggtccggttggcgtcctggccgcagctaattccgtgccggttctgctgtcagcccgtaccgaaaccgccctggcggcacaggcacgtctgctggaatctgcggtcgatgacagtgtgccgctgaccgcactggctagtgcgctggccaccggtCGCTCAGCTATGAACCACCGTTTAGCGGTAGCTGTCACATCGCGCGAAGGACTTCTGGCCGCTTTGTCCGCCGTAGCCCAAGGCCAGACACCTCCGGGAGCCGCGCGCTGCATCGCGAGTTCCTCACGT	344	gcggtaccaacgcacatgtgattattgctgaaccgccggaaccggaaccgctgccggaaccgggtccggttggcgtcctggccgcagctaattccgtgccggttctgctgtcagcccgtaccgaaaccgccctggcggcacaggcacgtctgctggaatctgcggtcgatgacagtgtgccgctgaccgcactggctagtgcgctggccaccggtCGCTCAGCTATGAACCACCGTTTAGCGGTAGCTGTCACATCGCGCGAAGGACTTCTGGCCGCTTTGTCCGCCGTAGCCCAAGGCCAGACACCTCCGGGAGCCGCGCGCTGCATCGCGAGTTCCTCACGT
us65	F38	gcggtaccaacgcacatgtg	attattgctgaaccgccggaaccggaaccgctgccggaaccgggtccggttggcgtcctggccgcagctaattccgtgccggttctgctgtcagcccgtaccgaaaccgccctggcggcacaggcacgtctgctggaatctgcggtcgatgacagtgtgccgctgaccgcactggctagtgcgctggccaccACCCGCTCAGCTATGAACCACCGTTTAGCGGTAGCTGTCACATCGCGCGAAGGACTTCTGGCCGCTTTGTCCGCCGTAGCCCAAGGCCAGACACCTCCGGGAGCCGCGCGC	TGCATCGCGAGTTCCTCACGT	gcggtaccaacgcacatgtgattattgctgaaccgccggaaccggaaccgctgccggaaccgggtccggttggcgtcctggccgcagctaattccgtgccggttctgctgtcagcccgtaccgaaaccgccctggcggcacaggcacgtctgctggaatctgcggtcgatgacagtgtgccgctgaccgcactggctagtgcgctggccaccACCCGCTCAGCTATGAACCACCGTTTAGCGGTAGCTGTCACATCGCGCGAAGGACTTCTGGCCGCTTTGTCCGCCGTAGCCCAAGGCCAGACACCTCCGGGAGCCGCGCGCTGCATCGCGAGTTCCTCACGT	344	gcggtaccaacgcacatgtgattattgctgaaccgccggaaccggaaccgctgccggaaccgggtccggttggcgtcctggccgcagctaattccgtgccggttctgctgtcagcccgtaccgaaaccgccctggcggcacaggcacgtctgctggaatctgcggtcgatgacagtgtgccgctgaccgcactggctagtgcgctggccaccACCCGCTCAGCTATGAACCACCGTTTAGCGGTAGCTGTCACATCGCGCGAAGGACTTCTGGCCGCTTTGTCCGCCGTAGCCCAAGGCCAGACACCTCCGGGAGCCGCGCGCTGCATCGCGAGTTCCTCACGT
us64	F39	gcggtaccaacgcacatgtg	attattgctgaaccgccggaaccggaaccgctgccggaaccgggtccggttggcgtcctggccgcagctaattccgtgccggttctgctgtcagcccgtaccgaaaccgccctggcggcacaggcacgtctgctggaatctgcggtcgatgacagtgtgccgctgaccgcactggctagtgcgctggccACTACCCGCTCAGCTATGAACCACCGTTTAGCGGTAGCTGTCACATCGCGCGAAGGACTTCTGGCCGCTTTGTCCGCCGTAGCCCAAGGCCAGACACCTCCGGGAGCCGCGCGC	TGCATCGCGAGTTCCTCACGT	gcggtaccaacgcacatgtgattattgctgaaccgccggaaccggaaccgctgccggaaccgggtccggttggcgtcctggccgcagctaattccgtgccggttctgctgtcagcccgtaccgaaaccgccctggcggcacaggcacgtctgctggaatctgcggtcgatgacagtgtgccgctgaccgcactggctagtgcgctggccACTACCCGCTCAGCTATGAACCACCGTTTAGCGGTAGCTGTCACATCGCGCGAAGGACTTCTGGCCGCTTTGTCCGCCGTAGCCCAAGGCCAGACACCTCCGGGAGCCGCGCGCTGCATCGCGAGTTCCTCACGT	344	gcggtaccaacgcacatgtgattattgctgaaccgccggaaccggaaccgctgccggaaccgggtccggttggcgtcctggccgcagctaattccgtgccggttctgctgtcagcccgtaccgaaaccgccctggcggcacaggcacgtctgctggaatctgcggtcgatgacagtgtgccgctgaccgcactggctagtgcgctggccACTACCCGCTCAGCTATGAACCACCGTTTAGCGGTAGCTGTCACATCGCGCGAAGGACTTCTGGCCGCTTTGTCCGCCGTAGCCCAAGGCCAGACACCTCCGGGAGCCGCGCGCTGCATCGCGAGTTCCTCACGT
us63	F40	gcggtaccaacgcacatgtg	attattgctgaaccgccggaaccggaaccgctgccggaaccgggtccggttggcgtcctggccgcagctaattccgtgccggttctgctgtcagcccgtaccgaaaccgccctggcggcacaggcacgtctgctggaatctgcggtcgatgacagtgtgccgctgaccgcactggctagtgcgctgGCTACTACCCGCTCAGCTATGAACCACCGTTTAGCGGTAGCTGTCACATCGCGCGAAGGACTTCTGGCCGCTTTGTCCGCCGTAGCCCAAGGCCAGACACCTCCGGGAGCCGCGCGC	TGCATCGCGAGTTCCTCACGT	gcggtaccaacgcacatgtgattattgctgaaccgccggaaccggaaccgctgccggaaccgggtccggttggcgtcctggccgcagctaattccgtgccggttctgctgtcagcccgtaccgaaaccgccctggcggcacaggcacgtctgctggaatctgcggtcgatgacagtgtgccgctgaccgcactggctagtgcgctgGCTACTACCCGCTCAGCTATGAACCACCGTTTAGCGGTAGCTGTCACATCGCGCGAAGGACTTCTGGCCGCTTTGTCCGCCGTAGCCCAAGGCCAGACACCTCCGGGAGCCGCGCGCTGCATCGCGAGTTCCTCACGT	344	gcggtaccaacgcacatgtgattattgctgaaccgccggaaccggaaccgctgccggaaccgggtccggttggcgtcctggccgcagctaattccgtgccggttctgctgtcagcccgtaccgaaaccgccctggcggcacaggcacgtctgctggaatctgcggtcgatgacagtgtgccgctgaccgcactggctagtgcgctgGCTACTACCCGCTCAGCTATGAACCACCGTTTAGCGGTAGCTGTCACATCGCGCGAAGGACTTCTGGCCGCTTTGTCCGCCGTAGCCCAAGGCCAGACACCTCCGGGAGCCGCGCGCTGCATCGCGAGTTCCTCACGT
us62	F41	gcggtaccaacgcacatgtg	attattgctgaaccgccggaaccggaaccgctgccggaaccgggtccggttggcgtcctggccgcagctaattccgtgccggttctgctgtcagcccgtaccgaaaccgccctggcggcacaggcacgtctgctggaatctgcggtcgatgacagtgtgccgctgaccgcactggctagtgcgCTGGCTACTACCCGCTCAGCTATGAACCACCGTTTAGCGGTAGCTGTCACATCGCGCGAAGGACTTCTGGCCGCTTTGTCCGCCGTAGCCCAAGGCCAGACACCTCCGGGAGCCGCGCGC	TGCATCGCGAGTTCCTCACGT	gcggtaccaacgcacatgtgattattgctgaaccgccggaaccggaaccgctgccggaaccgggtccggttggcgtcctggccgcagctaattccgtgccggttctgctgtcagcccgtaccgaaaccgccctggcggcacaggcacgtctgctggaatctgcggtcgatgacagtgtgccgctgaccgcactggctagtgcgCTGGCTACTACCCGCTCAGCTATGAACCACCGTTTAGCGGTAGCTGTCACATCGCGCGAAGGACTTCTGGCCGCTTTGTCCGCCGTAGCCCAAGGCCAGACACCTCCGGGAGCCGCGCGCTGCATCGCGAGTTCCTCACGT	344	gcggtaccaacgcacatgtgattattgctgaaccgccggaaccggaaccgctgccggaaccgggtccggttggcgtcctggccgcagctaattccgtgccggttctgctgtcagcccgtaccgaaaccgccctggcggcacaggcacgtctgctggaatctgcggtcgatgacagtgtgccgctgaccgcactggctagtgcgCTGGCTACTACCCGCTCAGCTATGAACCACCGTTTAGCGGTAGCTGTCACATCGCGCGAAGGACTTCTGGCCGCTTTGTCCGCCGTAGCCCAAGGCCAGACACCTCCGGGAGCCGCGCGCTGCATCGCGAGTTCCTCACGT
us61	F42	gcggtaccaacgcacatgtg	attattgctgaaccgccggaaccggaaccgctgccggaaccgggtccggttggcgtcctggccgcagctaattccgtgccggttctgctgtcagcccgtaccgaaaccgccctggcggcacaggcacgtctgctggaatctgcggtcgatgacagtgtgccgctgaccgcactggctagtTCTCTGGCTACTACCCGCTCAGCTATGAACCACCGTTTAGCGGTAGCTGTCACATCGCGCGAAGGACTTCTGGCCGCTTTGTCCGCCGTAGCCCAAGGCCAGACACCTCCGGGAGCCGCGCGC	TGCATCGCGAGTTCCTCACGT	gcggtaccaacgcacatgtgattattgctgaaccgccggaaccggaaccgctgccggaaccgggtccggttggcgtcctggccgcagctaattccgtgccggttctgctgtcagcccgtaccgaaaccgccctggcggcacaggcacgtctgctggaatctgcggtcgatgacagtgtgccgctgaccgcactggctagtTCTCTGGCTACTACCCGCTCAGCTATGAACCACCGTTTAGCGGTAGCTGTCACATCGCGCGAAGGACTTCTGGCCGCTTTGTCCGCCGTAGCCCAAGGCCAGACACCTCCGGGAGCCGCGCGCTGCATCGCGAGTTCCTCACGT	344	gcggtaccaacgcacatgtgattattgctgaaccgccggaaccggaaccgctgccggaaccgggtccggttggcgtcctggccgcagctaattccgtgccggttctgctgtcagcccgtaccgaaaccgccctggcggcacaggcacgtctgctggaatctgcggtcgatgacagtgtgccgctgaccgcactggctagtTCTCTGGCTACTACCCGCTCAGCTATGAACCACCGTTTAGCGGTAGCTGTCACATCGCGCGAAGGACTTCTGGCCGCTTTGTCCGCCGTAGCCCAAGGCCAGACACCTCCGGGAGCCGCGCGCTGCATCGCGAGTTCCTCACGT
us60	F43	gcggtaccaacgcacatgtg	attattgctgaaccgccggaaccggaaccgctgccggaaccgggtccggttggcgtcctggccgcagctaattccgtgccggttctgctgtcagcccgtaccgaaaccgccctggcggcacaggcacgtctgctggaatctgcggtcgatgacagtgtgccgctgaccgcactggctTTCTCTCTGGCTACTACCCGCTCAGCTATGAACCACCGTTTAGCGGTAGCTGTCACATCGCGCGAAGGACTTCTGGCCGCTTTGTCCGCCGTAGCCCAAGGCCAGACACCTCCGGGAGCCGCGCGC	TGCATCGCGAGTTCCTCACGT	gcggtaccaacgcacatgtgattattgctgaaccgccggaaccggaaccgctgccggaaccgggtccggttggcgtcctggccgcagctaattccgtgccggttctgctgtcagcccgtaccgaaaccgccctggcggcacaggcacgtctgctggaatctgcggtcgatgacagtgtgccgctgaccgcactggctTTCTCTCTGGCTACTACCCGCTCAGCTATGAACCACCGTTTAGCGGTAGCTGTCACATCGCGCGAAGGACTTCTGGCCGCTTTGTCCGCCGTAGCCCAAGGCCAGACACCTCCGGGAGCCGCGCGCTGCATCGCGAGTTCCTCACGT	344	gcggtaccaacgcacatgtgattattgctgaaccgccggaaccggaaccgctgccggaaccgggtccggttggcgtcctggccgcagctaattccgtgccggttctgctgtcagcccgtaccgaaaccgccctggcggcacaggcacgtctgctggaatctgcggtcgatgacagtgtgccgctgaccgcactggctTTCTCTCTGGCTACTACCCGCTCAGCTATGAACCACCGTTTAGCGGTAGCTGTCACATCGCGCGAAGGACTTCTGGCCGCTTTGTCCGCCGTAGCCCAAGGCCAGACACCTCCGGGAGCCGCGCGCTGCATCGCGAGTTCCTCACGT
us59	F44	gcggtaccaacgcacatgtg	attattgctgaaccgccggaaccggaaccgctgccggaaccgggtccggttggcgtcctggccgcagctaattccgtgccggttctgctgtcagcccgtaccgaaaccgccctggcggcacaggcacgtctgctggaatctgcggtcgatgacagtgtgccgctgaccgcactgGCATTCTCTCTGGCTACTACCCGCTCAGCTATGAACCACCGTTTAGCGGTAGCTGTCACATCGCGCGAAGGACTTCTGGCCGCTTTGTCCGCCGTAGCCCAAGGCCAGACACCTCCGGGAGCCGCGCGC	TGCATCGCGAGTTCCTCACGT	gcggtaccaacgcacatgtgattattgctgaaccgccggaaccggaaccgctgccggaaccgggtccggttggcgtcctggccgcagctaattccgtgccggttctgctgtcagcccgtaccgaaaccgccctggcggcacaggcacgtctgctggaatctgcggtcgatgacagtgtgccgctgaccgcactgGCATTCTCTCTGGCTACTACCCGCTCAGCTATGAACCACCGTTTAGCGGTAGCTGTCACATCGCGCGAAGGACTTCTGGCCGCTTTGTCCGCCGTAGCCCAAGGCCAGACACCTCCGGGAGCCGCGCGCTGCATCGCGAGTTCCTCACGT	344	gcggtaccaacgcacatgtgattattgctgaaccgccggaaccggaaccgctgccggaaccgggtccggttggcgtcctggccgcagctaattccgtgccggttctgctgtcagcccgtaccgaaaccgccctggcggcacaggcacgtctgctggaatctgcggtcgatgacagtgtgccgctgaccgcactgGCATTCTCTCTGGCTACTACCCGCTCAGCTATGAACCACCGTTTAGCGGTAGCTGTCACATCGCGCGAAGGACTTCTGGCCGCTTTGTCCGCCGTAGCCCAAGGCCAGACACCTCCGGGAGCCGCGCGCTGCATCGCGAGTTCCTCACGT
us58	F45	gcggtaccaacgcacatgtg	attattgctgaaccgccggaaccggaaccgctgccggaaccgggtccggttggcgtcctggccgcagctaattccgtgccggttctgctgtcagcccgtaccgaaaccgccctggcggcacaggcacgtctgctggaatctgcggtcgatgacagtgtgccgctgaccgcaGTGGCATTCTCTCTGGCTACTACCCGCTCAGCTATGAACCACCGTTTAGCGGTAGCTGTCACATCGCGCGAAGGACTTCTGGCCGCTTTGTCCGCCGTAGCCCAAGGCCAGACACCTCCGGGAGCCGCGCGC	TGCATCGCGAGTTCCTCACGT	gcggtaccaacgcacatgtgattattgctgaaccgccggaaccggaaccgctgccggaaccgggtccggttggcgtcctggccgcagctaattccgtgccggttctgctgtcagcccgtaccgaaaccgccctggcggcacaggcacgtctgctggaatctgcggtcgatgacagtgtgccgctgaccgcaGTGGCATTCTCTCTGGCTACTACCCGCTCAGCTATGAACCACCGTTTAGCGGTAGCTGTCACATCGCGCGAAGGACTTCTGGCCGCTTTGTCCGCCGTAGCCCAAGGCCAGACACCTCCGGGAGCCGCGCGCTGCATCGCGAGTTCCTCACGT	344	gcggtaccaacgcacatgtgattattgctgaaccgccggaaccggaaccgctgccggaaccgggtccggttggcgtcctggccgcagctaattccgtgccggttctgctgtcagcccgtaccgaaaccgccctggcggcacaggcacgtctgctggaatctgcggtcgatgacagtgtgccgctgaccgcaGTGGCATTCTCTCTGGCTACTACCCGCTCAGCTATGAACCACCGTTTAGCGGTAGCTGTCACATCGCGCGAAGGACTTCTGGCCGCTTTGTCCGCCGTAGCCCAAGGCCAGACACCTCCGGGAGCCGCGCGCTGCATCGCGAGTTCCTCACGT
us57	F46	gcggtaccaacgcacatgtg	attattgctgaaccgccggaaccggaaccgctgccggaaccgggtccggttggcgtcctggccgcagctaattccgtgccggttctgctgtcagcccgtaccgaaaccgccctggcggcacaggcacgtctgctggaatctgcggtcgatgacagtgtgccgctgaccGACGTGGCATTCTCTCTGGCTACTACCCGCTCAGCTATGAACCACCGTTTAGCGGTAGCTGTCACATCGCGCGAAGGACTTCTGGCCGCTTTGTCCGCCGTAGCCCAAGGCCAGACACCTCCGGGAGCCGCGCGC	TGCATCGCGAGTTCCTCACGT	gcggtaccaacgcacatgtgattattgctgaaccgccggaaccggaaccgctgccggaaccgggtccggttggcgtcctggccgcagctaattccgtgccggttctgctgtcagcccgtaccgaaaccgccctggcggcacaggcacgtctgctggaatctgcggtcgatgacagtgtgccgctgaccGACGTGGCATTCTCTCTGGCTACTACCCGCTCAGCTATGAACCACCGTTTAGCGGTAGCTGTCACATCGCGCGAAGGACTTCTGGCCGCTTTGTCCGCCGTAGCCCAAGGCCAGACACCTCCGGGAGCCGCGCGCTGCATCGCGAGTTCCTCACGT	344	gcggtaccaacgcacatgtgattattgctgaaccgccggaaccggaaccgctgccggaaccgggtccggttggcgtcctggccgcagctaattccgtgccggttctgctgtcagcccgtaccgaaaccgccctggcggcacaggcacgtctgctggaatctgcggtcgatgacagtgtgccgctgaccGACGTGGCATTCTCTCTGGCTACTACCCGCTCAGCTATGAACCACCGTTTAGCGGTAGCTGTCACATCGCGCGAAGGACTTCTGGCCGCTTTGTCCGCCGTAGCCCAAGGCCAGACACCTCCGGGAGCCGCGCGCTGCATCGCGAGTTCCTCACGT
us56	F47	gcggtaccaacgcacatgtg	attattgctgaaccgccggaaccggaaccgctgccggaaccgggtccggttggcgtcctggccgcagctaattccgtgccggttctgctgtcagcccgtaccgaaaccgccctggcggcacaggcacgtctgctggaatctgcggtcgatgacagtgtgccgctgGGGGACGTGGCATTCTCTCTGGCTACTACCCGCTCAGCTATGAACCACCGTTTAGCGGTAGCTGTCACATCGCGCGAAGGACTTCTGGCCGCTTTGTCCGCCGTAGCCCAAGGCCAGACACCTCCGGGAGCCGCGCGC	TGCATCGCGAGTTCCTCACGT	gcggtaccaacgcacatgtgattattgctgaaccgccggaaccggaaccgctgccggaaccgggtccggttggcgtcctggccgcagctaattccgtgccggttctgctgtcagcccgtaccgaaaccgccctggcggcacaggcacgtctgctggaatctgcggtcgatgacagtgtgccgctgGGGGACGTGGCATTCTCTCTGGCTACTACCCGCTCAGCTATGAACCACCGTTTAGCGGTAGCTGTCACATCGCGCGAAGGACTTCTGGCCGCTTTGTCCGCCGTAGCCCAAGGCCAGACACCTCCGGGAGCCGCGCGCTGCATCGCGAGTTCCTCACGT	344	gcggtaccaacgcacatgtgattattgctgaaccgccggaaccggaaccgctgccggaaccgggtccggttggcgtcctggccgcagctaattccgtgccggttctgctgtcagcccgtaccgaaaccgccctggcggcacaggcacgtctgctggaatctgcggtcgatgacagtgtgccgctgGGGGACGTGGCATTCTCTCTGGCTACTACCCGCTCAGCTATGAACCACCGTTTAGCGGTAGCTGTCACATCGCGCGAAGGACTTCTGGCCGCTTTGTCCGCCGTAGCCCAAGGCCAGACACCTCCGGGAGCCGCGCGCTGCATCGCGAGTTCCTCACGT
us55	F48	gcggtaccaacgcacatgtg	attattgctgaaccgccggaaccggaaccgctgccggaaccgggtccggttggcgtcctggccgcagctaattccgtgccggttctgctgtcagcccgtaccgaaaccgccctggcggcacaggcacgtctgctggaatctgcggtcgatgacagtgtgccgCTTGGGGACGTGGCATTCTCTCTGGCTACTACCCGCTCAGCTATGAACCACCGTTTAGCGGTAGCTGTCACATCGCGCGAAGGACTTCTGGCCGCTTTGTCCGCCGTAGCCCAAGGCCAGACACCTCCGGGAGCCGCGCGC	TGCATCGCGAGTTCCTCACGT	gcggtaccaacgcacatgtgattattgctgaaccgccggaaccggaaccgctgccggaaccgggtccggttggcgtcctggccgcagctaattccgtgccggttctgctgtcagcccgtaccgaaaccgccctggcggcacaggcacgtctgctggaatctgcggtcgatgacagtgtgccgCTTGGGGACGTGGCATTCTCTCTGGCTACTACCCGCTCAGCTATGAACCACCGTTTAGCGGTAGCTGTCACATCGCGCGAAGGACTTCTGGCCGCTTTGTCCGCCGTAGCCCAAGGCCAGACACCTCCGGGAGCCGCGCGCTGCATCGCGAGTTCCTCACGT	344	gcggtaccaacgcacatgtgattattgctgaaccgccggaaccggaaccgctgccggaaccgggtccggttggcgtcctggccgcagctaattccgtgccggttctgctgtcagcccgtaccgaaaccgccctggcggcacaggcacgtctgctggaatctgcggtcgatgacagtgtgccgCTTGGGGACGTGGCATTCTCTCTGGCTACTACCCGCTCAGCTATGAACCACCGTTTAGCGGTAGCTGTCACATCGCGCGAAGGACTTCTGGCCGCTTTGTCCGCCGTAGCCCAAGGCCAGACACCTCCGGGAGCCGCGCGCTGCATCGCGAGTTCCTCACGT
us54	F49	gcggtaccaacgcacatgtg	attattgctgaaccgccggaaccggaaccgctgccggaaccgggtccggttggcgtcctggccgcagctaattccgtgccggttctgctgtcagcccgtaccgaaaccgccctggcggcacaggcacgtctgctggaatctgcggtcgatgacagtgtgGGACTTGGGGACGTGGCATTCTCTCTGGCTACTACCCGCTCAGCTATGAACCACCGTTTAGCGGTAGCTGTCACATCGCGCGAAGGACTTCTGGCCGCTTTGTCCGCCGTAGCCCAAGGCCAGACACCTCCGGGAGCCGCGCGC	TGCATCGCGAGTTCCTCACGT	gcggtaccaacgcacatgtgattattgctgaaccgccggaaccggaaccgctgccggaaccgggtccggttggcgtcctggccgcagctaattccgtgccggttctgctgtcagcccgtaccgaaaccgccctggcggcacaggcacgtctgctggaatctgcggtcgatgacagtgtgGGACTTGGGGACGTGGCATTCTCTCTGGCTACTACCCGCTCAGCTATGAACCACCGTTTAGCGGTAGCTGTCACATCGCGCGAAGGACTTCTGGCCGCTTTGTCCGCCGTAGCCCAAGGCCAGACACCTCCGGGAGCCGCGCGCTGCATCGCGAGTTCCTCACGT	344	gcggtaccaacgcacatgtgattattgctgaaccgccggaaccggaaccgctgccggaaccgggtccggttggcgtcctggccgcagctaattccgtgccggttctgctgtcagcccgtaccgaaaccgccctggcggcacaggcacgtctgctggaatctgcggtcgatgacagtgtgGGACTTGGGGACGTGGCATTCTCTCTGGCTACTACCCGCTCAGCTATGAACCACCGTTTAGCGGTAGCTGTCACATCGCGCGAAGGACTTCTGGCCGCTTTGTCCGCCGTAGCCCAAGGCCAGACACCTCCGGGAGCCGCGCGCTGCATCGCGAGTTCCTCACGT
us53	F50	gcggtaccaacgcacatgtg	attattgctgaaccgccggaaccggaaccgctgccggaaccgggtccggttggcgtcctggccgcagctaattccgtgccggttctgctgtcagcccgtaccgaaaccgccctggcggcacaggcacgtctgctggaatctgcggtcgatgacagtCTGGGACTTGGGGACGTGGCATTCTCTCTGGCTACTACCCGCTCAGCTATGAACCACCGTTTAGCGGTAGCTGTCACATCGCGCGAAGGACTTCTGGCCGCTTTGTCCGCCGTAGCCCAAGGCCAGACACCTCCGGGAGCCGCGCGC	TGCATCGCGAGTTCCTCACGT	gcggtaccaacgcacatgtgattattgctgaaccgccggaaccggaaccgctgccggaaccgggtccggttggcgtcctggccgcagctaattccgtgccggttctgctgtcagcccgtaccgaaaccgccctggcggcacaggcacgtctgctggaatctgcggtcgatgacagtCTGGGACTTGGGGACGTGGCATTCTCTCTGGCTACTACCCGCTCAGCTATGAACCACCGTTTAGCGGTAGCTGTCACATCGCGCGAAGGACTTCTGGCCGCTTTGTCCGCCGTAGCCCAAGGCCAGACACCTCCGGGAGCCGCGCGCTGCATCGCGAGTTCCTCACGT	344	gcggtaccaacgcacatgtgattattgctgaaccgccggaaccggaaccgctgccggaaccgggtccggttggcgtcctggccgcagctaattccgtgccggttctgctgtcagcccgtaccgaaaccgccctggcggcacaggcacgtctgctggaatctgcggtcgatgacagtCTGGGACTTGGGGACGTGGCATTCTCTCTGGCTACTACCCGCTCAGCTATGAACCACCGTTTAGCGGTAGCTGTCACATCGCGCGAAGGACTTCTGGCCGCTTTGTCCGCCGTAGCCCAAGGCCAGACACCTCCGGGAGCCGCGCGCTGCATCGCGAGTTCCTCACGT
us52	F51	gcggtaccaacgcacatgtg	attattgctgaaccgccggaaccggaaccgctgccggaaccgggtccggttggcgtcctggccgcagctaattccgtgccggttctgctgtcagcccgtaccgaaaccgccctggcggcacaggcacgtctgctggaatctgcggtcgatgacGAGCTGGGACTTGGGGACGTGGCATTCTCTCTGGCTACTACCCGCTCAGCTATGAACCACCGTTTAGCGGTAGCTGTCACATCGCGCGAAGGACTTCTGGCCGCTTTGTCCGCCGTAGCCCAAGGCCAGACACCTCCGGGAGCCGCGCGC	TGCATCGCGAGTTCCTCACGT	gcggtaccaacgcacatgtgattattgctgaaccgccggaaccggaaccgctgccggaaccgggtccggttggcgtcctggccgcagctaattccgtgccggttctgctgtcagcccgtaccgaaaccgccctggcggcacaggcacgtctgctggaatctgcggtcgatgacGAGCTGGGACTTGGGGACGTGGCATTCTCTCTGGCTACTACCCGCTCAGCTATGAACCACCGTTTAGCGGTAGCTGTCACATCGCGCGAAGGACTTCTGGCCGCTTTGTCCGCCGTAGCCCAAGGCCAGACACCTCCGGGAGCCGCGCGCTGCATCGCGAGTTCCTCACGT	344	gcggtaccaacgcacatgtgattattgctgaaccgccggaaccggaaccgctgccggaaccgggtccggttggcgtcctggccgcagctaattccgtgccggttctgctgtcagcccgtaccgaaaccgccctggcggcacaggcacgtctgctggaatctgcggtcgatgacGAGCTGGGACTTGGGGACGTGGCATTCTCTCTGGCTACTACCCGCTCAGCTATGAACCACCGTTTAGCGGTAGCTGTCACATCGCGCGAAGGACTTCTGGCCGCTTTGTCCGCCGTAGCCCAAGGCCAGACACCTCCGGGAGCCGCGCGCTGCATCGCGAGTTCCTCACGT
us51	F52	gcggtaccaacgcacatgtg	attattgctgaaccgccggaaccggaaccgctgccggaaccgggtccggttggcgtcctggccgcagctaattccgtgccggttctgctgtcagcccgtaccgaaaccgccctggcggcacaggcacgtctgctggaatctgcggtcgatgacCCTGAGCTGGGACTTGGGGACGTGGCATTCTCTCTGGCTACTACCCGCTCAGCTATGAACCACCGTTTAGCGGTAGCTGTCACATCGCGCGAAGGACTTCTGGCCGCTTTGTCCGCCGTAGCCCAAGGCCAGACACCTCCGGGAGCCGCGCGC	TGCATCGCGAGTTCCTCACGT	gcggtaccaacgcacatgtgattattgctgaaccgccggaaccggaaccgctgccggaaccgggtccggttggcgtcctggccgcagctaattccgtgccggttctgctgtcagcccgtaccgaaaccgccctggcggcacaggcacgtctgctggaatctgcggtcgatgacCCTGAGCTGGGACTTGGGGACGTGGCATTCTCTCTGGCTACTACCCGCTCAGCTATGAACCACCGTTTAGCGGTAGCTGTCACATCGCGCGAAGGACTTCTGGCCGCTTTGTCCGCCGTAGCCCAAGGCCAGACACCTCCGGGAGCCGCGCGCTGCATCGCGAGTTCCTCACGT	347	gcggtaccaacgcacatgtgattattgctgaaccgccggaaccggaaccgctgccggaaccgggtccggttggcgtcctggccgcagctaattccgtgccggttctgctgtcagcccgtaccgaaaccgccctggcggcacaggcacgtctgctggaatctgcggtcgatgacCCTGAGCTGGGACTTGGGGACGTGGCATTCTCTCTGGCTACTACCCGCTCAGCTATGAACCACCGTTTAGCGGTAGCTGTCACATCGCGCGAAGGACTTCTGGCCGCTTTGTCCGCCGTAGCCCAAGGCCAGACACCTCCGGGAGCCGCGCGCTGCATCGCGAGTTCCTCACGT
us51	F53	gcggtaccaacgcacatgtg	attattgctgaaccgccggaaccggaaccgctgccggaaccgggtccggttggcgtcctggccgcagctaattccgtgccggttctgctgtcagcccgtaccgaaaccgccctggcggcacaggcacgtctgctggaatctgcggtcgatgacCACCCTGAGCTGGGACTTGGGGACGTGGCATTCTCTCTGGCTACTACCCGCTCAGCTATGAACCACCGTTTAGCGGTAGCTGTCACATCGCGCGAAGGACTTCTGGCCGCTTTGTCCGCCGTAGCCCAAGGCCAGACACCTCCGGGAGCCGCGCGC	TGCATCGCGAGTTCCTCACGT	gcggtaccaacgcacatgtgattattgctgaaccgccggaaccggaaccgctgccggaaccgggtccggttggcgtcctggccgcagctaattccgtgccggttctgctgtcagcccgtaccgaaaccgccctggcggcacaggcacgtctgctggaatctgcggtcgatgacCACCCTGAGCTGGGACTTGGGGACGTGGCATTCTCTCTGGCTACTACCCGCTCAGCTATGAACCACCGTTTAGCGGTAGCTGTCACATCGCGCGAAGGACTTCTGGCCGCTTTGTCCGCCGTAGCCCAAGGCCAGACACCTCCGGGAGCCGCGCGCTGCATCGCGAGTTCCTCACGT	350	gcggtaccaacgcacatgtgattattgctgaaccgccggaaccggaaccgctgccggaaccgggtccggttggcgtcctggccgcagctaattccgtgccggttctgctgtcagcccgtaccgaaaccgccctggcggcacaggcacgtctgctggaatctgcggtcgatgacCACCCTGAGCTGGGACTTGGGGACGTGGCATTCTCTCTGGCTACTACCCGCTCAGCTATGAACCACCGTTTAGCGGTAGCTGTCACATCGCGCGAAGGACTTCTGGCCGCTTTGTCCGCCGTAGCCCAAGGCCAGACACCTCCGGGAGCCGCGCGCTGCATCGCGAGTTCCTCACGT
us51	F54	gcggtaccaacgcacatgtg	attattgctgaaccgccggaaccggaaccgctgccggaaccgggtccggttggcgtcctggccgcagctaattccgtgccggttctgctgtcagcccgtaccgaaaccgccctggcggcacaggcacgtctgctggaatctgcggtcgatATGCACCCTGAGCTGGGACTTGGGGACGTGGCATTCTCTCTGGCTACTACCCGCTCAGCTATGAACCACCGTTTAGCGGTAGCTGTCACATCGCGCGAAGGACTTCTGGCCGCTTTGTCCGCCGTAGCCCAAGGCCAGACACCTCCGGGAGCCGCGCGC	TGCATCGCGAGTTCCTCACGT	gcggtaccaacgcacatgtgattattgctgaaccgccggaaccggaaccgctgccggaaccgggtccggttggcgtcctggccgcagctaattccgtgccggttctgctgtcagcccgtaccgaaaccgccctggcggcacaggcacgtctgctggaatctgcggtcgatATGCACCCTGAGCTGGGACTTGGGGACGTGGCATTCTCTCTGGCTACTACCCGCTCAGCTATGAACCACCGTTTAGCGGTAGCTGTCACATCGCGCGAAGGACTTCTGGCCGCTTTGTCCGCCGTAGCCCAAGGCCAGACACCTCCGGGAGCCGCGCGCTGCATCGCGAGTTCCTCACGT	350	gcggtaccaacgcacatgtgattattgctgaaccgccggaaccggaaccgctgccggaaccgggtccggttggcgtcctggccgcagctaattccgtgccggttctgctgtcagcccgtaccgaaaccgccctggcggcacaggcacgtctgctggaatctgcggtcgatATGCACCCTGAGCTGGGACTTGGGGACGTGGCATTCTCTCTGGCTACTACCCGCTCAGCTATGAACCACCGTTTAGCGGTAGCTGTCACATCGCGCGAAGGACTTCTGGCCGCTTTGTCCGCCGTAGCCCAAGGCCAGACACCTCCGGGAGCCGCGCGCTGCATCGCGAGTTCCTCACGT
us50	F55	gcggtaccaacgcacatgtg	attattgctgaaccgccggaaccggaaccgctgccggaaccgggtccggttggcgtcctggccgcagctaattccgtgccggttctgctgtcagcccgtaccgaaaccgccctggcggcacaggcacgtctgctggaatctgcggtcGACATGCACCCTGAGCTGGGACTTGGGGACGTGGCATTCTCTCTGGCTACTACCCGCTCAGCTATGAACCACCGTTTAGCGGTAGCTGTCACATCGCGCGAAGGACTTCTGGCCGCTTTGTCCGCCGTAGCCCAAGGCCAGACACCTCCGGGAGCCGCGCGC	TGCATCGCGAGTTCCTCACGT	gcggtaccaacgcacatgtgattattgctgaaccgccggaaccggaaccgctgccggaaccgggtccggttggcgtcctggccgcagctaattccgtgccggttctgctgtcagcccgtaccgaaaccgccctggcggcacaggcacgtctgctggaatctgcggtcGACATGCACCCTGAGCTGGGACTTGGGGACGTGGCATTCTCTCTGGCTACTACCCGCTCAGCTATGAACCACCGTTTAGCGGTAGCTGTCACATCGCGCGAAGGACTTCTGGCCGCTTTGTCCGCCGTAGCCCAAGGCCAGACACCTCCGGGAGCCGCGCGCTGCATCGCGAGTTCCTCACGT	350	gcggtaccaacgcacatgtgattattgctgaaccgccggaaccggaaccgctgccggaaccgggtccggttggcgtcctggccgcagctaattccgtgccggttctgctgtcagcccgtaccgaaaccgccctggcggcacaggcacgtctgctggaatctgcggtcGACATGCACCCTGAGCTGGGACTTGGGGACGTGGCATTCTCTCTGGCTACTACCCGCTCAGCTATGAACCACCGTTTAGCGGTAGCTGTCACATCGCGCGAAGGACTTCTGGCCGCTTTGTCCGCCGTAGCCCAAGGCCAGACACCTCCGGGAGCCGCGCGCTGCATCGCGAGTTCCTCACGT
us49	F56	gcggtaccaacgcacatgtg	attattgctgaaccgccggaaccggaaccgctgccggaaccgggtccggttggcgtcctggccgcagctaattccgtgccggttctgctgtcagcccgtaccgaaaccgccctggcggcacaggcacgtctgctggaatctgcgTTAGACATGCACCCTGAGCTGGGACTTGGGGACGTGGCATTCTCTCTGGCTACTACCCGCTCAGCTATGAACCACCGTTTAGCGGTAGCTGTCACATCGCGCGAAGGACTTCTGGCCGCTTTGTCCGCCGTAGCCCAAGGCCAGACACCTCCGGGAGCCGCGCGC	TGCATCGCGAGTTCCTCACGT	gcggtaccaacgcacatgtgattattgctgaaccgccggaaccggaaccgctgccggaaccgggtccggttggcgtcctggccgcagctaattccgtgccggttctgctgtcagcccgtaccgaaaccgccctggcggcacaggcacgtctgctggaatctgcgTTAGACATGCACCCTGAGCTGGGACTTGGGGACGTGGCATTCTCTCTGGCTACTACCCGCTCAGCTATGAACCACCGTTTAGCGGTAGCTGTCACATCGCGCGAAGGACTTCTGGCCGCTTTGTCCGCCGTAGCCCAAGGCCAGACACCTCCGGGAGCCGCGCGCTGCATCGCGAGTTCCTCACGT	350	gcggtaccaacgcacatgtgattattgctgaaccgccggaaccggaaccgctgccggaaccgggtccggttggcgtcctggccgcagctaattccgtgccggttctgctgtcagcccgtaccgaaaccgccctggcggcacaggcacgtctgctggaatctgcgTTAGACATGCACCCTGAGCTGGGACTTGGGGACGTGGCATTCTCTCTGGCTACTACCCGCTCAGCTATGAACCACCGTTTAGCGGTAGCTGTCACATCGCGCGAAGGACTTCTGGCCGCTTTGTCCGCCGTAGCCCAAGGCCAGACACCTCCGGGAGCCGCGCGCTGCATCGCGAGTTCCTCACGT
us48	F57	gcggtaccaacgcacatgtg	attattgctgaaccgccggaaccggaaccgctgccggaaccgggtccggttggcgtcctggccgcagctaattccgtgccggttctgctgtcagcccgtaccgaaaccgccctggcggcacaggcacgtctgctggaatctCACTTAGACATGCACCCTGAGCTGGGACTTGGGGACGTGGCATTCTCTCTGGCTACTACCCGCTCAGCTATGAACCACCGTTTAGCGGTAGCTGTCACATCGCGCGAAGGACTTCTGGCCGCTTTGTCCGCCGTAGCCCAAGGCCAGACACCTCCGGGAGCCGCGCGC	TGCATCGCGAGTTCCTCACGT	gcggtaccaacgcacatgtgattattgctgaaccgccggaaccggaaccgctgccggaaccgggtccggttggcgtcctggccgcagctaattccgtgccggttctgctgtcagcccgtaccgaaaccgccctggcggcacaggcacgtctgctggaatctCACTTAGACATGCACCCTGAGCTGGGACTTGGGGACGTGGCATTCTCTCTGGCTACTACCCGCTCAGCTATGAACCACCGTTTAGCGGTAGCTGTCACATCGCGCGAAGGACTTCTGGCCGCTTTGTCCGCCGTAGCCCAAGGCCAGACACCTCCGGGAGCCGCGCGCTGCATCGCGAGTTCCTCACGT	350	gcggtaccaacgcacatgtgattattgctgaaccgccggaaccggaaccgctgccggaaccgggtccggttggcgtcctggccgcagctaattccgtgccggttctgctgtcagcccgtaccgaaaccgccctggcggcacaggcacgtctgctggaatctCACTTAGACATGCACCCTGAGCTGGGACTTGGGGACGTGGCATTCTCTCTGGCTACTACCCGCTCAGCTATGAACCACCGTTTAGCGGTAGCTGTCACATCGCGCGAAGGACTTCTGGCCGCTTTGTCCGCCGTAGCCCAAGGCCAGACACCTCCGGGAGCCGCGCGCTGCATCGCGAGTTCCTCACGT
us47	F58	gcggtaccaacgcacatgtg	attattgctgaaccgccggaaccggaaccgctgccggaaccgggtccggttggcgtcctggccgcagctaattccgtgccggttctgctgtcagcccgtaccgaaaccgccctggcggcacaggcacgtctgctggaaGAGCACTTAGACATGCACCCTGAGCTGGGACTTGGGGACGTGGCATTCTCTCTGGCTACTACCCGCTCAGCTATGAACCACCGTTTAGCGGTAGCTGTCACATCGCGCGAAGGACTTCTGGCCGCTTTGTCCGCCGTAGCCCAAGGCCAGACACCTCCGGGAGCCGCGCGC	TGCATCGCGAGTTCCTCACGT	gcggtaccaacgcacatgtgattattgctgaaccgccggaaccggaaccgctgccggaaccgggtccggttggcgtcctggccgcagctaattccgtgccggttctgctgtcagcccgtaccgaaaccgccctggcggcacaggcacgtctgctggaaGAGCACTTAGACATGCACCCTGAGCTGGGACTTGGGGACGTGGCATTCTCTCTGGCTACTACCCGCTCAGCTATGAACCACCGTTTAGCGGTAGCTGTCACATCGCGCGAAGGACTTCTGGCCGCTTTGTCCGCCGTAGCCCAAGGCCAGACACCTCCGGGAGCCGCGCGCTGCATCGCGAGTTCCTCACGT	350	gcggtaccaacgcacatgtgattattgctgaaccgccggaaccggaaccgctgccggaaccgggtccggttggcgtcctggccgcagctaattccgtgccggttctgctgtcagcccgtaccgaaaccgccctggcggcacaggcacgtctgctggaaGAGCACTTAGACATGCACCCTGAGCTGGGACTTGGGGACGTGGCATTCTCTCTGGCTACTACCCGCTCAGCTATGAACCACCGTTTAGCGGTAGCTGTCACATCGCGCGAAGGACTTCTGGCCGCTTTGTCCGCCGTAGCCCAAGGCCAGACACCTCCGGGAGCCGCGCGCTGCATCGCGAGTTCCTCACGT
us46	F59	gcggtaccaacgcacatgtg	attattgctgaaccgccggaaccggaaccgctgccggaaccgggtccggttggcgtcctggccgcagctaattccgtgccggttctgctgtcagcccgtaccgaaaccgccctggcggcacaggcacgtctgctgCGCGAGCACTTAGACATGCACCCTGAGCTGGGACTTGGGGACGTGGCATTCTCTCTGGCTACTACCCGCTCAGCTATGAACCACCGTTTAGCGGTAGCTGTCACATCGCGCGAAGGACTTCTGGCCGCTTTGTCCGCCGTAGCCCAAGGCCAGACACCTCCGGGAGCCGCGCGC	TGCATCGCGAGTTCCTCACGT	gcggtaccaacgcacatgtgattattgctgaaccgccggaaccggaaccgctgccggaaccgggtccggttggcgtcctggccgcagctaattccgtgccggttctgctgtcagcccgtaccgaaaccgccctggcggcacaggcacgtctgctgCGCGAGCACTTAGACATGCACCCTGAGCTGGGACTTGGGGACGTGGCATTCTCTCTGGCTACTACCCGCTCAGCTATGAACCACCGTTTAGCGGTAGCTGTCACATCGCGCGAAGGACTTCTGGCCGCTTTGTCCGCCGTAGCCCAAGGCCAGACACCTCCGGGAGCCGCGCGCTGCATCGCGAGTTCCTCACGT	350	gcggtaccaacgcacatgtgattattgctgaaccgccggaaccggaaccgctgccggaaccgggtccggttggcgtcctggccgcagctaattccgtgccggttctgctgtcagcccgtaccgaaaccgccctggcggcacaggcacgtctgctgCGCGAGCACTTAGACATGCACCCTGAGCTGGGACTTGGGGACGTGGCATTCTCTCTGGCTACTACCCGCTCAGCTATGAACCACCGTTTAGCGGTAGCTGTCACATCGCGCGAAGGACTTCTGGCCGCTTTGTCCGCCGTAGCCCAAGGCCAGACACCTCCGGGAGCCGCGCGCTGCATCGCGAGTTCCTCACGT
us45	F60	gcggtaccaacgcacatgtg	attattgctgaaccgccggaaccggaaccgctgccggaaccgggtccggttggcgtcctggccgcagctaattccgtgccggttctgctgtcagcccgtaccgaaaccgccctggcggcacaggcacgtctgTTACGCGAGCACTTAGACATGCACCCTGAGCTGGGACTTGGGGACGTGGCATTCTCTCTGGCTACTACCCGCTCAGCTATGAACCACCGTTTAGCGGTAGCTGTCACATCGCGCGAAGGACTTCTGGCCGCTTTGTCCGCCGTAGCCCAAGGCCAGACACCTCCGGGAGCCGCGCGC	TGCATCGCGAGTTCCTCACGT	gcggtaccaacgcacatgtgattattgctgaaccgccggaaccggaaccgctgccggaaccgggtccggttggcgtcctggccgcagctaattccgtgccggttctgctgtcagcccgtaccgaaaccgccctggcggcacaggcacgtctgTTACGCGAGCACTTAGACATGCACCCTGAGCTGGGACTTGGGGACGTGGCATTCTCTCTGGCTACTACCCGCTCAGCTATGAACCACCGTTTAGCGGTAGCTGTCACATCGCGCGAAGGACTTCTGGCCGCTTTGTCCGCCGTAGCCCAAGGCCAGACACCTCCGGGAGCCGCGCGCTGCATCGCGAGTTCCTCACGT	350	gcggtaccaacgcacatgtgattattgctgaaccgccggaaccggaaccgctgccggaaccgggtccggttggcgtcctggccgcagctaattccgtgccggttctgctgtcagcccgtaccgaaaccgccctggcggcacaggcacgtctgTTACGCGAGCACTTAGACATGCACCCTGAGCTGGGACTTGGGGACGTGGCATTCTCTCTGGCTACTACCCGCTCAGCTATGAACCACCGTTTAGCGGTAGCTGTCACATCGCGCGAAGGACTTCTGGCCGCTTTGTCCGCCGTAGCCCAAGGCCAGACACCTCCGGGAGCCGCGCGCTGCATCGCGAGTTCCTCACGT
us44	F61	gcggtaccaacgcacatgtg	attattgctgaaccgccggaaccggaaccgctgccggaaccgggtccggttggcgtcctggccgcagctaattccgtgccggttctgctgtcagcccgtaccgaaaccgccctggcggcacaggcacgtCGCTTACGCGAGCACTTAGACATGCACCCTGAGCTGGGACTTGGGGACGTGGCATTCTCTCTGGCTACTACCCGCTCAGCTATGAACCACCGTTTAGCGGTAGCTGTCACATCGCGCGAAGGACTTCTGGCCGCTTTGTCCGCCGTAGCCCAAGGCCAGACACCTCCGGGAGCCGCGCGC	TGCATCGCGAGTTCCTCACGT	gcggtaccaacgcacatgtgattattgctgaaccgccggaaccggaaccgctgccggaaccgggtccggttggcgtcctggccgcagctaattccgtgccggttctgctgtcagcccgtaccgaaaccgccctggcggcacaggcacgtCGCTTACGCGAGCACTTAGACATGCACCCTGAGCTGGGACTTGGGGACGTGGCATTCTCTCTGGCTACTACCCGCTCAGCTATGAACCACCGTTTAGCGGTAGCTGTCACATCGCGCGAAGGACTTCTGGCCGCTTTGTCCGCCGTAGCCCAAGGCCAGACACCTCCGGGAGCCGCGCGCTGCATCGCGAGTTCCTCACGT	350	gcggtaccaacgcacatgtgattattgctgaaccgccggaaccggaaccgctgccggaaccgggtccggttggcgtcctggccgcagctaattccgtgccggttctgctgtcagcccgtaccgaaaccgccctggcggcacaggcacgtCGCTTACGCGAGCACTTAGACATGCACCCTGAGCTGGGACTTGGGGACGTGGCATTCTCTCTGGCTACTACCCGCTCAGCTATGAACCACCGTTTAGCGGTAGCTGTCACATCGCGCGAAGGACTTCTGGCCGCTTTGTCCGCCGTAGCCCAAGGCCAGACACCTCCGGGAGCCGCGCGCTGCATCGCGAGTTCCTCACGT
us43	F62	gcggtaccaacgcacatgtg	attattgctgaaccgccggaaccggaaccgctgccggaaccgggtccggttggcgtcctggccgcagctaattccgtgccggttctgctgtcagcccgtaccgaaaccgccctggcggcacaggcaGCCCGCTTACGCGAGCACTTAGACATGCACCCTGAGCTGGGACTTGGGGACGTGGCATTCTCTCTGGCTACTACCCGCTCAGCTATGAACCACCGTTTAGCGGTAGCTGTCACATCGCGCGAAGGACTTCTGGCCGCTTTGTCCGCCGTAGCCCAAGGCCAGACACCTCCGGGAGCCGCGCGC	TGCATCGCGAGTTCCTCACGT	gcggtaccaacgcacatgtgattattgctgaaccgccggaaccggaaccgctgccggaaccgggtccggttggcgtcctggccgcagctaattccgtgccggttctgctgtcagcccgtaccgaaaccgccctggcggcacaggcaGCCCGCTTACGCGAGCACTTAGACATGCACCCTGAGCTGGGACTTGGGGACGTGGCATTCTCTCTGGCTACTACCCGCTCAGCTATGAACCACCGTTTAGCGGTAGCTGTCACATCGCGCGAAGGACTTCTGGCCGCTTTGTCCGCCGTAGCCCAAGGCCAGACACCTCCGGGAGCCGCGCGCTGCATCGCGAGTTCCTCACGT	350	gcggtaccaacgcacatgtgattattgctgaaccgccggaaccggaaccgctgccggaaccgggtccggttggcgtcctggccgcagctaattccgtgccggttctgctgtcagcccgtaccgaaaccgccctggcggcacaggcaGCCCGCTTACGCGAGCACTTAGACATGCACCCTGAGCTGGGACTTGGGGACGTGGCATTCTCTCTGGCTACTACCCGCTCAGCTATGAACCACCGTTTAGCGGTAGCTGTCACATCGCGCGAAGGACTTCTGGCCGCTTTGTCCGCCGTAGCCCAAGGCCAGACACCTCCGGGAGCCGCGCGCTGCATCGCGAGTTCCTCACGT
us42	F63	gcggtaccaacgcacatgtg	attattgctgaaccgccggaaccggaaccgctgccggaaccgggtccggttggcgtcctggccgcagctaattccgtgccggttctgctgtcagcccgtaccgaaaccgccctggcggcacagGCAGCCCGCTTACGCGAGCACTTAGACATGCACCCTGAGCTGGGACTTGGGGACGTGGCATTCTCTCTGGCTACTACCCGCTCAGCTATGAACCACCGTTTAGCGGTAGCTGTCACATCGCGCGAAGGACTTCTGGCCGCTTTGTCCGCCGTAGCCCAAGGCCAGACACCTCCGGGAGCCGCGCGC	TGCATCGCGAGTTCCTCACGT	gcggtaccaacgcacatgtgattattgctgaaccgccggaaccggaaccgctgccggaaccgggtccggttggcgtcctggccgcagctaattccgtgccggttctgctgtcagcccgtaccgaaaccgccctggcggcacagGCAGCCCGCTTACGCGAGCACTTAGACATGCACCCTGAGCTGGGACTTGGGGACGTGGCATTCTCTCTGGCTACTACCCGCTCAGCTATGAACCACCGTTTAGCGGTAGCTGTCACATCGCGCGAAGGACTTCTGGCCGCTTTGTCCGCCGTAGCCCAAGGCCAGACACCTCCGGGAGCCGCGCGCTGCATCGCGAGTTCCTCACGT	350	gcggtaccaacgcacatgtgattattgctgaaccgccggaaccggaaccgctgccggaaccgggtccggttggcgtcctggccgcagctaattccgtgccggttctgctgtcagcccgtaccgaaaccgccctggcggcacagGCAGCCCGCTTACGCGAGCACTTAGACATGCACCCTGAGCTGGGACTTGGGGACGTGGCATTCTCTCTGGCTACTACCCGCTCAGCTATGAACCACCGTTTAGCGGTAGCTGTCACATCGCGCGAAGGACTTCTGGCCGCTTTGTCCGCCGTAGCCCAAGGCCAGACACCTCCGGGAGCCGCGCGCTGCATCGCGAGTTCCTCACGT
us41	F64	gcggtaccaacgcacatgtg	attattgctgaaccgccggaaccggaaccgctgccggaaccgggtccggttggcgtcctggccgcagctaattccgtgccggttctgctgtcagcccgtaccgaaaccgccctggcggcaCAGGCAGCCCGCTTACGCGAGCACTTAGACATGCACCCTGAGCTGGGACTTGGGGACGTGGCATTCTCTCTGGCTACTACCCGCTCAGCTATGAACCACCGTTTAGCGGTAGCTGTCACATCGCGCGAAGGACTTCTGGCCGCTTTGTCCGCCGTAGCCCAAGGCCAGACACCTCCGGGAGCCGCGCGC	TGCATCGCGAGTTCCTCACGT	gcggtaccaacgcacatgtgattattgctgaaccgccggaaccggaaccgctgccggaaccgggtccggttggcgtcctggccgcagctaattccgtgccggttctgctgtcagcccgtaccgaaaccgccctggcggcaCAGGCAGCCCGCTTACGCGAGCACTTAGACATGCACCCTGAGCTGGGACTTGGGGACGTGGCATTCTCTCTGGCTACTACCCGCTCAGCTATGAACCACCGTTTAGCGGTAGCTGTCACATCGCGCGAAGGACTTCTGGCCGCTTTGTCCGCCGTAGCCCAAGGCCAGACACCTCCGGGAGCCGCGCGCTGCATCGCGAGTTCCTCACGT	350	gcggtaccaacgcacatgtgattattgctgaaccgccggaaccggaaccgctgccggaaccgggtccggttggcgtcctggccgcagctaattccgtgccggttctgctgtcagcccgtaccgaaaccgccctggcggcaCAGGCAGCCCGCTTACGCGAGCACTTAGACATGCACCCTGAGCTGGGACTTGGGGACGTGGCATTCTCTCTGGCTACTACCCGCTCAGCTATGAACCACCGTTTAGCGGTAGCTGTCACATCGCGCGAAGGACTTCTGGCCGCTTTGTCCGCCGTAGCCCAAGGCCAGACACCTCCGGGAGCCGCGCGCTGCATCGCGAGTTCCTCACGT
us40	F65	gcggtaccaacgcacatgtg	attattgctgaaccgccggaaccggaaccgctgccggaaccgggtccggttggcgtcctggccgcagctaattccgtgccggttctgctgtcagcccgtaccgaaaccgccctggcgGCTCAGGCAGCCCGCTTACGCGAGCACTTAGACATGCACCCTGAGCTGGGACTTGGGGACGTGGCATTCTCTCTGGCTACTACCCGCTCAGCTATGAACCACCGTTTAGCGGTAGCTGTCACATCGCGCGAAGGACTTCTGGCCGCTTTGTCCGCCGTAGCCCAAGGCCAGACACCTCCGGGAGCCGCGCGC	TGCATCGCGAGTTCCTCACGT	gcggtaccaacgcacatgtgattattgctgaaccgccggaaccggaaccgctgccggaaccgggtccggttggcgtcctggccgcagctaattccgtgccggttctgctgtcagcccgtaccgaaaccgccctggcgGCTCAGGCAGCCCGCTTACGCGAGCACTTAGACATGCACCCTGAGCTGGGACTTGGGGACGTGGCATTCTCTCTGGCTACTACCCGCTCAGCTATGAACCACCGTTTAGCGGTAGCTGTCACATCGCGCGAAGGACTTCTGGCCGCTTTGTCCGCCGTAGCCCAAGGCCAGACACCTCCGGGAGCCGCGCGCTGCATCGCGAGTTCCTCACGT	350	gcggtaccaacgcacatgtgattattgctgaaccgccggaaccggaaccgctgccggaaccgggtccggttggcgtcctggccgcagctaattccgtgccggttctgctgtcagcccgtaccgaaaccgccctggcgGCTCAGGCAGCCCGCTTACGCGAGCACTTAGACATGCACCCTGAGCTGGGACTTGGGGACGTGGCATTCTCTCTGGCTACTACCCGCTCAGCTATGAACCACCGTTTAGCGGTAGCTGTCACATCGCGCGAAGGACTTCTGGCCGCTTTGTCCGCCGTAGCCCAAGGCCAGACACCTCCGGGAGCCGCGCGCTGCATCGCGAGTTCCTCACGT
us39	F66	gcggtaccaacgcacatgtg	attattgctgaaccgccggaaccggaaccgctgccggaaccgggtccggttggcgtcctggccgcagctaattccgtgccggttctgctgtcagcccgtaccgaaaccgccctgGACGCTCAGGCAGCCCGCTTACGCGAGCACTTAGACATGCACCCTGAGCTGGGACTTGGGGACGTGGCATTCTCTCTGGCTACTACCCGCTCAGCTATGAACCACCGTTTAGCGGTAGCTGTCACATCGCGCGAAGGACTTCTGGCCGCTTTGTCCGCCGTAGCCCAAGGCCAGACACCTCCGGGAGCCGCGCGC	TGCATCGCGAGTTCCTCACGT	gcggtaccaacgcacatgtgattattgctgaaccgccggaaccggaaccgctgccggaaccgggtccggttggcgtcctggccgcagctaattccgtgccggttctgctgtcagcccgtaccgaaaccgccctgGACGCTCAGGCAGCCCGCTTACGCGAGCACTTAGACATGCACCCTGAGCTGGGACTTGGGGACGTGGCATTCTCTCTGGCTACTACCCGCTCAGCTATGAACCACCGTTTAGCGGTAGCTGTCACATCGCGCGAAGGACTTCTGGCCGCTTTGTCCGCCGTAGCCCAAGGCCAGACACCTCCGGGAGCCGCGCGCTGCATCGCGAGTTCCTCACGT	350	gcggtaccaacgcacatgtgattattgctgaaccgccggaaccggaaccgctgccggaaccgggtccggttggcgtcctggccgcagctaattccgtgccggttctgctgtcagcccgtaccgaaaccgccctgGACGCTCAGGCAGCCCGCTTACGCGAGCACTTAGACATGCACCCTGAGCTGGGACTTGGGGACGTGGCATTCTCTCTGGCTACTACCCGCTCAGCTATGAACCACCGTTTAGCGGTAGCTGTCACATCGCGCGAAGGACTTCTGGCCGCTTTGTCCGCCGTAGCCCAAGGCCAGACACCTCCGGGAGCCGCGCGCTGCATCGCGAGTTCCTCACGT
us38	F67	gcggtaccaacgcacatgtg	attattgctgaaccgccggaaccggaaccgctgccggaaccgggtccggttggcgtcctggccgcagctaattccgtgccggttctgctgtcagcccgtaccgaaaccgccCTGGACGCTCAGGCAGCCCGCTTACGCGAGCACTTAGACATGCACCCTGAGCTGGGACTTGGGGACGTGGCATTCTCTCTGGCTACTACCCGCTCAGCTATGAACCACCGTTTAGCGGTAGCTGTCACATCGCGCGAAGGACTTCTGGCCGCTTTGTCCGCCGTAGCCCAAGGCCAGACACCTCCGGGAGCCGCGCGC	TGCATCGCGAGTTCCTCACGT	gcggtaccaacgcacatgtgattattgctgaaccgccggaaccggaaccgctgccggaaccgggtccggttggcgtcctggccgcagctaattccgtgccggttctgctgtcagcccgtaccgaaaccgccCTGGACGCTCAGGCAGCCCGCTTACGCGAGCACTTAGACATGCACCCTGAGCTGGGACTTGGGGACGTGGCATTCTCTCTGGCTACTACCCGCTCAGCTATGAACCACCGTTTAGCGGTAGCTGTCACATCGCGCGAAGGACTTCTGGCCGCTTTGTCCGCCGTAGCCCAAGGCCAGACACCTCCGGGAGCCGCGCGCTGCATCGCGAGTTCCTCACGT	350	gcggtaccaacgcacatgtgattattgctgaaccgccggaaccggaaccgctgccggaaccgggtccggttggcgtcctggccgcagctaattccgtgccggttctgctgtcagcccgtaccgaaaccgccCTGGACGCTCAGGCAGCCCGCTTACGCGAGCACTTAGACATGCACCCTGAGCTGGGACTTGGGGACGTGGCATTCTCTCTGGCTACTACCCGCTCAGCTATGAACCACCGTTTAGCGGTAGCTGTCACATCGCGCGAAGGACTTCTGGCCGCTTTGTCCGCCGTAGCCCAAGGCCAGACACCTCCGGGAGCCGCGCGCTGCATCGCGAGTTCCTCACGT
us37	F68	gcggtaccaacgcacatgtg	attattgctgaaccgccggaaccggaaccgctgccggaaccgggtccggttggcgtcctggccgcagctaattccgtgccggttctgctgtcagcccgtaccgaaaccGCTCTGGACGCTCAGGCAGCCCGCTTACGCGAGCACTTAGACATGCACCCTGAGCTGGGACTTGGGGACGTGGCATTCTCTCTGGCTACTACCCGCTCAGCTATGAACCACCGTTTAGCGGTAGCTGTCACATCGCGCGAAGGACTTCTGGCCGCTTTGTCCGCCGTAGCCCAAGGCCAGACACCTCCGGGAGCCGCGCGC	TGCATCGCGAGTTCCTCACGT	gcggtaccaacgcacatgtgattattgctgaaccgccggaaccggaaccgctgccggaaccgggtccggttggcgtcctggccgcagctaattccgtgccggttctgctgtcagcccgtaccgaaaccGCTCTGGACGCTCAGGCAGCCCGCTTACGCGAGCACTTAGACATGCACCCTGAGCTGGGACTTGGGGACGTGGCATTCTCTCTGGCTACTACCCGCTCAGCTATGAACCACCGTTTAGCGGTAGCTGTCACATCGCGCGAAGGACTTCTGGCCGCTTTGTCCGCCGTAGCCCAAGGCCAGACACCTCCGGGAGCCGCGCGCTGCATCGCGAGTTCCTCACGT	350	gcggtaccaacgcacatgtgattattgctgaaccgccggaaccggaaccgctgccggaaccgggtccggttggcgtcctggccgcagctaattccgtgccggttctgctgtcagcccgtaccgaaaccGCTCTGGACGCTCAGGCAGCCCGCTTACGCGAGCACTTAGACATGCACCCTGAGCTGGGACTTGGGGACGTGGCATTCTCTCTGGCTACTACCCGCTCAGCTATGAACCACCGTTTAGCGGTAGCTGTCACATCGCGCGAAGGACTTCTGGCCGCTTTGTCCGCCGTAGCCCAAGGCCAGACACCTCCGGGAGCCGCGCGCTGCATCGCGAGTTCCTCACGT
us36	F69	gcggtaccaacgcacatgtg	attattgctgaaccgccggaaccggaaccgctgccggaaccgggtccggttggcgtcctggccgcagctaattccgtgccggttctgctgtcagcccgtaccgaaGGCGCTCTGGACGCTCAGGCAGCCCGCTTACGCGAGCACTTAGACATGCACCCTGAGCTGGGACTTGGGGACGTGGCATTCTCTCTGGCTACTACCCGCTCAGCTATGAACCACCGTTTAGCGGTAGCTGTCACATCGCGCGAAGGACTTCTGGCCGCTTTGTCCGCCGTAGCCCAAGGCCAGACACCTCCGGGAGCCGCGCGC	TGCATCGCGAGTTCCTCACGT	gcggtaccaacgcacatgtgattattgctgaaccgccggaaccggaaccgctgccggaaccgggtccggttggcgtcctggccgcagctaattccgtgccggttctgctgtcagcccgtaccgaaGGCGCTCTGGACGCTCAGGCAGCCCGCTTACGCGAGCACTTAGACATGCACCCTGAGCTGGGACTTGGGGACGTGGCATTCTCTCTGGCTACTACCCGCTCAGCTATGAACCACCGTTTAGCGGTAGCTGTCACATCGCGCGAAGGACTTCTGGCCGCTTTGTCCGCCGTAGCCCAAGGCCAGACACCTCCGGGAGCCGCGCGCTGCATCGCGAGTTCCTCACGT	350	gcggtaccaacgcacatgtgattattgctgaaccgccggaaccggaaccgctgccggaaccgggtccggttggcgtcctggccgcagctaattccgtgccggttctgctgtcagcccgtaccgaaGGCGCTCTGGACGCTCAGGCAGCCCGCTTACGCGAGCACTTAGACATGCACCCTGAGCTGGGACTTGGGGACGTGGCATTCTCTCTGGCTACTACCCGCTCAGCTATGAACCACCGTTTAGCGGTAGCTGTCACATCGCGCGAAGGACTTCTGGCCGCTTTGTCCGCCGTAGCCCAAGGCCAGACACCTCCGGGAGCCGCGCGCTGCATCGCGAGTTCCTCACGT
us35	F70	gcggtaccaacgcacatgtg	attattgctgaaccgccggaaccggaaccgctgccggaaccgggtccggttggcgtcctggccgcagctaattccgtgccggttctgctgtcagcccgtaccGAGGGCGCTCTGGACGCTCAGGCAGCCCGCTTACGCGAGCACTTAGACATGCACCCTGAGCTGGGACTTGGGGACGTGGCATTCTCTCTGGCTACTACCCGCTCAGCTATGAACCACCGTTTAGCGGTAGCTGTCACATCGCGCGAAGGACTTCTGGCCGCTTTGTCCGCCGTAGCCCAAGGCCAGACACCTCCGGGAGCCGCGCGC	TGCATCGCGAGTTCCTCACGT	gcggtaccaacgcacatgtgattattgctgaaccgccggaaccggaaccgctgccggaaccgggtccggttggcgtcctggccgcagctaattccgtgccggttctgctgtcagcccgtaccGAGGGCGCTCTGGACGCTCAGGCAGCCCGCTTACGCGAGCACTTAGACATGCACCCTGAGCTGGGACTTGGGGACGTGGCATTCTCTCTGGCTACTACCCGCTCAGCTATGAACCACCGTTTAGCGGTAGCTGTCACATCGCGCGAAGGACTTCTGGCCGCTTTGTCCGCCGTAGCCCAAGGCCAGACACCTCCGGGAGCCGCGCGCTGCATCGCGAGTTCCTCACGT	350	gcggtaccaacgcacatgtgattattgctgaaccgccggaaccggaaccgctgccggaaccgggtccggttggcgtcctggccgcagctaattccgtgccggttctgctgtcagcccgtaccGAGGGCGCTCTGGACGCTCAGGCAGCCCGCTTACGCGAGCACTTAGACATGCACCCTGAGCTGGGACTTGGGGACGTGGCATTCTCTCTGGCTACTACCCGCTCAGCTATGAACCACCGTTTAGCGGTAGCTGTCACATCGCGCGAAGGACTTCTGGCCGCTTTGTCCGCCGTAGCCCAAGGCCAGACACCTCCGGGAGCCGCGCGCTGCATCGCGAGTTCCTCACGT
us34	F71	gcggtaccaacgcacatgtg	attattgctgaaccgccggaaccggaaccgctgccggaaccgggtccggttggcgtcctggccgcagctaattccgtgccggttctgctgtcagcccgtAGTGAGGGCGCTCTGGACGCTCAGGCAGCCCGCTTACGCGAGCACTTAGACATGCACCCTGAGCTGGGACTTGGGGACGTGGCATTCTCTCTGGCTACTACCCGCTCAGCTATGAACCACCGTTTAGCGGTAGCTGTCACATCGCGCGAAGGACTTCTGGCCGCTTTGTCCGCCGTAGCCCAAGGCCAGACACCTCCGGGAGCCGCGCGC	TGCATCGCGAGTTCCTCACGT	gcggtaccaacgcacatgtgattattgctgaaccgccggaaccggaaccgctgccggaaccgggtccggttggcgtcctggccgcagctaattccgtgccggttctgctgtcagcccgtAGTGAGGGCGCTCTGGACGCTCAGGCAGCCCGCTTACGCGAGCACTTAGACATGCACCCTGAGCTGGGACTTGGGGACGTGGCATTCTCTCTGGCTACTACCCGCTCAGCTATGAACCACCGTTTAGCGGTAGCTGTCACATCGCGCGAAGGACTTCTGGCCGCTTTGTCCGCCGTAGCCCAAGGCCAGACACCTCCGGGAGCCGCGCGCTGCATCGCGAGTTCCTCACGT	350	gcggtaccaacgcacatgtgattattgctgaaccgccggaaccggaaccgctgccggaaccgggtccggttggcgtcctggccgcagctaattccgtgccggttctgctgtcagcccgtAGTGAGGGCGCTCTGGACGCTCAGGCAGCCCGCTTACGCGAGCACTTAGACATGCACCCTGAGCTGGGACTTGGGGACGTGGCATTCTCTCTGGCTACTACCCGCTCAGCTATGAACCACCGTTTAGCGGTAGCTGTCACATCGCGCGAAGGACTTCTGGCCGCTTTGTCCGCCGTAGCCCAAGGCCAGACACCTCCGGGAGCCGCGCGCTGCATCGCGAGTTCCTCACGT
us33	F72	gcggtaccaacgcacatgtg	attattgctgaaccgccggaaccggaaccgctgccggaaccgggtccggttggcgtcctggccgcagctaattccgtgccggttctgctgtcagccAAGAGTGAGGGCGCTCTGGACGCTCAGGCAGCCCGCTTACGCGAGCACTTAGACATGCACCCTGAGCTGGGACTTGGGGACGTGGCATTCTCTCTGGCTACTACCCGCTCAGCTATGAACCACCGTTTAGCGGTAGCTGTCACATCGCGCGAAGGACTTCTGGCCGCTTTGTCCGCCGTAGCCCAAGGCCAGACACCTCCGGGAGCCGCGCGC	TGCATCGCGAGTTCCTCACGT	gcggtaccaacgcacatgtgattattgctgaaccgccggaaccggaaccgctgccggaaccgggtccggttggcgtcctggccgcagctaattccgtgccggttctgctgtcagccAAGAGTGAGGGCGCTCTGGACGCTCAGGCAGCCCGCTTACGCGAGCACTTAGACATGCACCCTGAGCTGGGACTTGGGGACGTGGCATTCTCTCTGGCTACTACCCGCTCAGCTATGAACCACCGTTTAGCGGTAGCTGTCACATCGCGCGAAGGACTTCTGGCCGCTTTGTCCGCCGTAGCCCAAGGCCAGACACCTCCGGGAGCCGCGCGCTGCATCGCGAGTTCCTCACGT	350	gcggtaccaacgcacatgtgattattgctgaaccgccggaaccggaaccgctgccggaaccgggtccggttggcgtcctggccgcagctaattccgtgccggttctgctgtcagccAAGAGTGAGGGCGCTCTGGACGCTCAGGCAGCCCGCTTACGCGAGCACTTAGACATGCACCCTGAGCTGGGACTTGGGGACGTGGCATTCTCTCTGGCTACTACCCGCTCAGCTATGAACCACCGTTTAGCGGTAGCTGTCACATCGCGCGAAGGACTTCTGGCCGCTTTGTCCGCCGTAGCCCAAGGCCAGACACCTCCGGGAGCCGCGCGCTGCATCGCGAGTTCCTCACGT
us32	F73	gcggtaccaacgcacatgtg	attattgctgaaccgccggaaccggaaccgctgccggaaccgggtccggttggcgtcctggccgcagctaattccgtgccggttctgctgtcaGGGAAGAGTGAGGGCGCTCTGGACGCTCAGGCAGCCCGCTTACGCGAGCACTTAGACATGCACCCTGAGCTGGGACTTGGGGACGTGGCATTCTCTCTGGCTACTACCCGCTCAGCTATGAACCACCGTTTAGCGGTAGCTGTCACATCGCGCGAAGGACTTCTGGCCGCTTTGTCCGCCGTAGCCCAAGGCCAGACACCTCCGGGAGCCGCGCGC	TGCATCGCGAGTTCCTCACGT	gcggtaccaacgcacatgtgattattgctgaaccgccggaaccggaaccgctgccggaaccgggtccggttggcgtcctggccgcagctaattccgtgccggttctgctgtcaGGGAAGAGTGAGGGCGCTCTGGACGCTCAGGCAGCCCGCTTACGCGAGCACTTAGACATGCACCCTGAGCTGGGACTTGGGGACGTGGCATTCTCTCTGGCTACTACCCGCTCAGCTATGAACCACCGTTTAGCGGTAGCTGTCACATCGCGCGAAGGACTTCTGGCCGCTTTGTCCGCCGTAGCCCAAGGCCAGACACCTCCGGGAGCCGCGCGCTGCATCGCGAGTTCCTCACGT	350	gcggtaccaacgcacatgtgattattgctgaaccgccggaaccggaaccgctgccggaaccgggtccggttggcgtcctggccgcagctaattccgtgccggttctgctgtcaGGGAAGAGTGAGGGCGCTCTGGACGCTCAGGCAGCCCGCTTACGCGAGCACTTAGACATGCACCCTGAGCTGGGACTTGGGGACGTGGCATTCTCTCTGGCTACTACCCGCTCAGCTATGAACCACCGTTTAGCGGTAGCTGTCACATCGCGCGAAGGACTTCTGGCCGCTTTGTCCGCCGTAGCCCAAGGCCAGACACCTCCGGGAGCCGCGCGCTGCATCGCGAGTTCCTCACGT
us31	F74	gcggtaccaacgcacatgtg	attattgctgaaccgccggaaccggaaccgctgccggaaccgggtccggttggcgtcctggccgcagctaattccgtgccggttctgctgTCCGGGAAGAGTGAGGGCGCTCTGGACGCTCAGGCAGCCCGCTTACGCGAGCACTTAGACATGCACCCTGAGCTGGGACTTGGGGACGTGGCATTCTCTCTGGCTACTACCCGCTCAGCTATGAACCACCGTTTAGCGGTAGCTGTCACATCGCGCGAAGGACTTCTGGCCGCTTTGTCCGCCGTAGCCCAAGGCCAGACACCTCCGGGAGCCGCGCGC	TGCATCGCGAGTTCCTCACGT	gcggtaccaacgcacatgtgattattgctgaaccgccggaaccggaaccgctgccggaaccgggtccggttggcgtcctggccgcagctaattccgtgccggttctgctgTCCGGGAAGAGTGAGGGCGCTCTGGACGCTCAGGCAGCCCGCTTACGCGAGCACTTAGACATGCACCCTGAGCTGGGACTTGGGGACGTGGCATTCTCTCTGGCTACTACCCGCTCAGCTATGAACCACCGTTTAGCGGTAGCTGTCACATCGCGCGAAGGACTTCTGGCCGCTTTGTCCGCCGTAGCCCAAGGCCAGACACCTCCGGGAGCCGCGCGCTGCATCGCGAGTTCCTCACGT	350	gcggtaccaacgcacatgtgattattgctgaaccgccggaaccggaaccgctgccggaaccgggtccggttggcgtcctggccgcagctaattccgtgccggttctgctgTCCGGGAAGAGTGAGGGCGCTCTGGACGCTCAGGCAGCCCGCTTACGCGAGCACTTAGACATGCACCCTGAGCTGGGACTTGGGGACGTGGCATTCTCTCTGGCTACTACCCGCTCAGCTATGAACCACCGTTTAGCGGTAGCTGTCACATCGCGCGAAGGACTTCTGGCCGCTTTGTCCGCCGTAGCCCAAGGCCAGACACCTCCGGGAGCCGCGCGCTGCATCGCGAGTTCCTCACGT
us30	F75	gcggtaccaacgcacatgtg	attattgctgaaccgccggaaccggaaccgctgccggaaccgggtccggttggcgtcctggccgcagctaattccgtgccggttctgTTATCCGGGAAGAGTGAGGGCGCTCTGGACGCTCAGGCAGCCCGCTTACGCGAGCACTTAGACATGCACCCTGAGCTGGGACTTGGGGACGTGGCATTCTCTCTGGCTACTACCCGCTCAGCTATGAACCACCGTTTAGCGGTAGCTGTCACATCGCGCGAAGGACTTCTGGCCGCTTTGTCCGCCGTAGCCCAAGGCCAGACACCTCCGGGAGCCGCGCGC	TGCATCGCGAGTTCCTCACGT	gcggtaccaacgcacatgtgattattgctgaaccgccggaaccggaaccgctgccggaaccgggtccggttggcgtcctggccgcagctaattccgtgccggttctgTTATCCGGGAAGAGTGAGGGCGCTCTGGACGCTCAGGCAGCCCGCTTACGCGAGCACTTAGACATGCACCCTGAGCTGGGACTTGGGGACGTGGCATTCTCTCTGGCTACTACCCGCTCAGCTATGAACCACCGTTTAGCGGTAGCTGTCACATCGCGCGAAGGACTTCTGGCCGCTTTGTCCGCCGTAGCCCAAGGCCAGACACCTCCGGGAGCCGCGCGCTGCATCGCGAGTTCCTCACGT	350	gcggtaccaacgcacatgtgattattgctgaaccgccggaaccggaaccgctgccggaaccgggtccggttggcgtcctggccgcagctaattccgtgccggttctgTTATCCGGGAAGAGTGAGGGCGCTCTGGACGCTCAGGCAGCCCGCTTACGCGAGCACTTAGACATGCACCCTGAGCTGGGACTTGGGGACGTGGCATTCTCTCTGGCTACTACCCGCTCAGCTATGAACCACCGTTTAGCGGTAGCTGTCACATCGCGCGAAGGACTTCTGGCCGCTTTGTCCGCCGTAGCCCAAGGCCAGACACCTCCGGGAGCCGCGCGCTGCATCGCGAGTTCCTCACGT
us29	F76	gcggtaccaacgcacatgtg	attattgctgaaccgccggaaccggaaccgctgccggaaccgggtccggttggcgtcctggccgcagctaattccgtgccggttGTCTTATCCGGGAAGAGTGAGGGCGCTCTGGACGCTCAGGCAGCCCGCTTACGCGAGCACTTAGACATGCACCCTGAGCTGGGACTTGGGGACGTGGCATTCTCTCTGGCTACTACCCGCTCAGCTATGAACCACCGTTTAGCGGTAGCTGTCACATCGCGCGAAGGACTTCTGGCCGCTTTGTCCGCCGTAGCCCAAGGCCAGACACCTCCGGGAGCCGCGCGC	TGCATCGCGAGTTCCTCACGT	gcggtaccaacgcacatgtgattattgctgaaccgccggaaccggaaccgctgccggaaccgggtccggttggcgtcctggccgcagctaattccgtgccggttGTCTTATCCGGGAAGAGTGAGGGCGCTCTGGACGCTCAGGCAGCCCGCTTACGCGAGCACTTAGACATGCACCCTGAGCTGGGACTTGGGGACGTGGCATTCTCTCTGGCTACTACCCGCTCAGCTATGAACCACCGTTTAGCGGTAGCTGTCACATCGCGCGAAGGACTTCTGGCCGCTTTGTCCGCCGTAGCCCAAGGCCAGACACCTCCGGGAGCCGCGCGCTGCATCGCGAGTTCCTCACGT	350	gcggtaccaacgcacatgtgattattgctgaaccgccggaaccggaaccgctgccggaaccgggtccggttggcgtcctggccgcagctaattccgtgccggttGTCTTATCCGGGAAGAGTGAGGGCGCTCTGGACGCTCAGGCAGCCCGCTTACGCGAGCACTTAGACATGCACCCTGAGCTGGGACTTGGGGACGTGGCATTCTCTCTGGCTACTACCCGCTCAGCTATGAACCACCGTTTAGCGGTAGCTGTCACATCGCGCGAAGGACTTCTGGCCGCTTTGTCCGCCGTAGCCCAAGGCCAGACACCTCCGGGAGCCGCGCGCTGCATCGCGAGTTCCTCACGT
us28	F77	gcggtaccaacgcacatgtg	attattgctgaaccgccggaaccggaaccgctgccggaaccgggtccggttggcgtcctggccgcagctaattccgtgccgTTGGTCTTATCCGGGAAGAGTGAGGGCGCTCTGGACGCTCAGGCAGCCCGCTTACGCGAGCACTTAGACATGCACCCTGAGCTGGGACTTGGGGACGTGGCATTCTCTCTGGCTACTACCCGCTCAGCTATGAACCACCGTTTAGCGGTAGCTGTCACATCGCGCGAAGGACTTCTGGCCGCTTTGTCCGCCGTAGCCCAAGGCCAGACACCTCCGGGAGCCGCGCGC	TGCATCGCGAGTTCCTCACGT	gcggtaccaacgcacatgtgattattgctgaaccgccggaaccggaaccgctgccggaaccgggtccggttggcgtcctggccgcagctaattccgtgccgTTGGTCTTATCCGGGAAGAGTGAGGGCGCTCTGGACGCTCAGGCAGCCCGCTTACGCGAGCACTTAGACATGCACCCTGAGCTGGGACTTGGGGACGTGGCATTCTCTCTGGCTACTACCCGCTCAGCTATGAACCACCGTTTAGCGGTAGCTGTCACATCGCGCGAAGGACTTCTGGCCGCTTTGTCCGCCGTAGCCCAAGGCCAGACACCTCCGGGAGCCGCGCGCTGCATCGCGAGTTCCTCACGT	350	gcggtaccaacgcacatgtgattattgctgaaccgccggaaccggaaccgctgccggaaccgggtccggttggcgtcctggccgcagctaattccgtgccgTTGGTCTTATCCGGGAAGAGTGAGGGCGCTCTGGACGCTCAGGCAGCCCGCTTACGCGAGCACTTAGACATGCACCCTGAGCTGGGACTTGGGGACGTGGCATTCTCTCTGGCTACTACCCGCTCAGCTATGAACCACCGTTTAGCGGTAGCTGTCACATCGCGCGAAGGACTTCTGGCCGCTTTGTCCGCCGTAGCCCAAGGCCAGACACCTCCGGGAGCCGCGCGCTGCATCGCGAGTTCCTCACGT
us27	F78	gcggtaccaacgcacatgtg	attattgctgaaccgccggaaccggaaccgctgccggaaccgggtccggttggcgtcctggccgcagctaattccgtgCTGTTGGTCTTATCCGGGAAGAGTGAGGGCGCTCTGGACGCTCAGGCAGCCCGCTTACGCGAGCACTTAGACATGCACCCTGAGCTGGGACTTGGGGACGTGGCATTCTCTCTGGCTACTACCCGCTCAGCTATGAACCACCGTTTAGCGGTAGCTGTCACATCGCGCGAAGGACTTCTGGCCGCTTTGTCCGCCGTAGCCCAAGGCCAGACACCTCCGGGAGCCGCGCGC	TGCATCGCGAGTTCCTCACGT	gcggtaccaacgcacatgtgattattgctgaaccgccggaaccggaaccgctgccggaaccgggtccggttggcgtcctggccgcagctaattccgtgCTGTTGGTCTTATCCGGGAAGAGTGAGGGCGCTCTGGACGCTCAGGCAGCCCGCTTACGCGAGCACTTAGACATGCACCCTGAGCTGGGACTTGGGGACGTGGCATTCTCTCTGGCTACTACCCGCTCAGCTATGAACCACCGTTTAGCGGTAGCTGTCACATCGCGCGAAGGACTTCTGGCCGCTTTGTCCGCCGTAGCCCAAGGCCAGACACCTCCGGGAGCCGCGCGCTGCATCGCGAGTTCCTCACGT	350	gcggtaccaacgcacatgtgattattgctgaaccgccggaaccggaaccgctgccggaaccgggtccggttggcgtcctggccgcagctaattccgtgCTGTTGGTCTTATCCGGGAAGAGTGAGGGCGCTCTGGACGCTCAGGCAGCCCGCTTACGCGAGCACTTAGACATGCACCCTGAGCTGGGACTTGGGGACGTGGCATTCTCTCTGGCTACTACCCGCTCAGCTATGAACCACCGTTTAGCGGTAGCTGTCACATCGCGCGAAGGACTTCTGGCCGCTTTGTCCGCCGTAGCCCAAGGCCAGACACCTCCGGGAGCCGCGCGCTGCATCGCGAGTTCCTCACGT
us26	F79	gcggtaccaacgcacatgtg	attattgctgaaccgccggaaccggaaccgctgccggaaccgggtccggttggcgtcctggccgcagctaattccGAGCTGTTGGTCTTATCCGGGAAGAGTGAGGGCGCTCTGGACGCTCAGGCAGCCCGCTTACGCGAGCACTTAGACATGCACCCTGAGCTGGGACTTGGGGACGTGGCATTCTCTCTGGCTACTACCCGCTCAGCTATGAACCACCGTTTAGCGGTAGCTGTCACATCGCGCGAAGGACTTCTGGCCGCTTTGTCCGCCGTAGCCCAAGGCCAGACACCTCCGGGAGCCGCGCGC	TGCATCGCGAGTTCCTCACGT	gcggtaccaacgcacatgtgattattgctgaaccgccggaaccggaaccgctgccggaaccgggtccggttggcgtcctggccgcagctaattccGAGCTGTTGGTCTTATCCGGGAAGAGTGAGGGCGCTCTGGACGCTCAGGCAGCCCGCTTACGCGAGCACTTAGACATGCACCCTGAGCTGGGACTTGGGGACGTGGCATTCTCTCTGGCTACTACCCGCTCAGCTATGAACCACCGTTTAGCGGTAGCTGTCACATCGCGCGAAGGACTTCTGGCCGCTTTGTCCGCCGTAGCCCAAGGCCAGACACCTCCGGGAGCCGCGCGCTGCATCGCGAGTTCCTCACGT	350	gcggtaccaacgcacatgtgattattgctgaaccgccggaaccggaaccgctgccggaaccgggtccggttggcgtcctggccgcagctaattccGAGCTGTTGGTCTTATCCGGGAAGAGTGAGGGCGCTCTGGACGCTCAGGCAGCCCGCTTACGCGAGCACTTAGACATGCACCCTGAGCTGGGACTTGGGGACGTGGCATTCTCTCTGGCTACTACCCGCTCAGCTATGAACCACCGTTTAGCGGTAGCTGTCACATCGCGCGAAGGACTTCTGGCCGCTTTGTCCGCCGTAGCCCAAGGCCAGACACCTCCGGGAGCCGCGCGCTGCATCGCGAGTTCCTCACGT
us25	F80	gcggtaccaacgcacatgtg	attattgctgaaccgccggaaccggaaccgctgccggaaccgggtccggttggcgtcctggccgcagctaatGCGGAGCTGTTGGTCTTATCCGGGAAGAGTGAGGGCGCTCTGGACGCTCAGGCAGCCCGCTTACGCGAGCACTTAGACATGCACCCTGAGCTGGGACTTGGGGACGTGGCATTCTCTCTGGCTACTACCCGCTCAGCTATGAACCACCGTTTAGCGGTAGCTGTCACATCGCGCGAAGGACTTCTGGCCGCTTTGTCCGCCGTAGCCCAAGGCCAGACACCTCCGGGAGCCGCGCGC	TGCATCGCGAGTTCCTCACGT	gcggtaccaacgcacatgtgattattgctgaaccgccggaaccggaaccgctgccggaaccgggtccggttggcgtcctggccgcagctaatGCGGAGCTGTTGGTCTTATCCGGGAAGAGTGAGGGCGCTCTGGACGCTCAGGCAGCCCGCTTACGCGAGCACTTAGACATGCACCCTGAGCTGGGACTTGGGGACGTGGCATTCTCTCTGGCTACTACCCGCTCAGCTATGAACCACCGTTTAGCGGTAGCTGTCACATCGCGCGAAGGACTTCTGGCCGCTTTGTCCGCCGTAGCCCAAGGCCAGACACCTCCGGGAGCCGCGCGCTGCATCGCGAGTTCCTCACGT	350	gcggtaccaacgcacatgtgattattgctgaaccgccggaaccggaaccgctgccggaaccgggtccggttggcgtcctggccgcagctaatGCGGAGCTGTTGGTCTTATCCGGGAAGAGTGAGGGCGCTCTGGACGCTCAGGCAGCCCGCTTACGCGAGCACTTAGACATGCACCCTGAGCTGGGACTTGGGGACGTGGCATTCTCTCTGGCTACTACCCGCTCAGCTATGAACCACCGTTTAGCGGTAGCTGTCACATCGCGCGAAGGACTTCTGGCCGCTTTGTCCGCCGTAGCCCAAGGCCAGACACCTCCGGGAGCCGCGCGCTGCATCGCGAGTTCCTCACGT
us24	F81	gcggtaccaacgcacatgtg	attattgctgaaccgccggaaccggaaccgctgccggaaccgggtccggttggcgtcctggccgcagctAGCGCGGAGCTGTTGGTCTTATCCGGGAAGAGTGAGGGCGCTCTGGACGCTCAGGCAGCCCGCTTACGCGAGCACTTAGACATGCACCCTGAGCTGGGACTTGGGGACGTGGCATTCTCTCTGGCTACTACCCGCTCAGCTATGAACCACCGTTTAGCGGTAGCTGTCACATCGCGCGAAGGACTTCTGGCCGCTTTGTCCGCCGTAGCCCAAGGCCAGACACCTCCGGGAGCCGCGCGC	TGCATCGCGAGTTCCTCACGT	gcggtaccaacgcacatgtgattattgctgaaccgccggaaccggaaccgctgccggaaccgggtccggttggcgtcctggccgcagctAGCGCGGAGCTGTTGGTCTTATCCGGGAAGAGTGAGGGCGCTCTGGACGCTCAGGCAGCCCGCTTACGCGAGCACTTAGACATGCACCCTGAGCTGGGACTTGGGGACGTGGCATTCTCTCTGGCTACTACCCGCTCAGCTATGAACCACCGTTTAGCGGTAGCTGTCACATCGCGCGAAGGACTTCTGGCCGCTTTGTCCGCCGTAGCCCAAGGCCAGACACCTCCGGGAGCCGCGCGCTGCATCGCGAGTTCCTCACGT	350	gcggtaccaacgcacatgtgattattgctgaaccgccggaaccggaaccgctgccggaaccgggtccggttggcgtcctggccgcagctAGCGCGGAGCTGTTGGTCTTATCCGGGAAGAGTGAGGGCGCTCTGGACGCTCAGGCAGCCCGCTTACGCGAGCACTTAGACATGCACCCTGAGCTGGGACTTGGGGACGTGGCATTCTCTCTGGCTACTACCCGCTCAGCTATGAACCACCGTTTAGCGGTAGCTGTCACATCGCGCGAAGGACTTCTGGCCGCTTTGTCCGCCGTAGCCCAAGGCCAGACACCTCCGGGAGCCGCGCGCTGCATCGCGAGTTCCTCACGT
us23	F82	gcggtaccaacgcacatgtg	attattgctgaaccgccggaaccggaaccgctgccggaaccgggtccggttggcgtcctggccgcaCGCAGCGCGGAGCTGTTGGTCTTATCCGGGAAGAGTGAGGGCGCTCTGGACGCTCAGGCAGCCCGCTTACGCGAGCACTTAGACATGCACCCTGAGCTGGGACTTGGGGACGTGGCATTCTCTCTGGCTACTACCCGCTCAGCTATGAACCACCGTTTAGCGGTAGCTGTCACATCGCGCGAAGGACTTCTGGCCGCTTTGTCCGCCGTAGCCCAAGGCCAGACACCTCCGGGAGCCGCGCGC	TGCATCGCGAGTTCCTCACGT	gcggtaccaacgcacatgtgattattgctgaaccgccggaaccggaaccgctgccggaaccgggtccggttggcgtcctggccgcaCGCAGCGCGGAGCTGTTGGTCTTATCCGGGAAGAGTGAGGGCGCTCTGGACGCTCAGGCAGCCCGCTTACGCGAGCACTTAGACATGCACCCTGAGCTGGGACTTGGGGACGTGGCATTCTCTCTGGCTACTACCCGCTCAGCTATGAACCACCGTTTAGCGGTAGCTGTCACATCGCGCGAAGGACTTCTGGCCGCTTTGTCCGCCGTAGCCCAAGGCCAGACACCTCCGGGAGCCGCGCGCTGCATCGCGAGTTCCTCACGT	350	gcggtaccaacgcacatgtgattattgctgaaccgccggaaccggaaccgctgccggaaccgggtccggttggcgtcctggccgcaCGCAGCGCGGAGCTGTTGGTCTTATCCGGGAAGAGTGAGGGCGCTCTGGACGCTCAGGCAGCCCGCTTACGCGAGCACTTAGACATGCACCCTGAGCTGGGACTTGGGGACGTGGCATTCTCTCTGGCTACTACCCGCTCAGCTATGAACCACCGTTTAGCGGTAGCTGTCACATCGCGCGAAGGACTTCTGGCCGCTTTGTCCGCCGTAGCCCAAGGCCAGACACCTCCGGGAGCCGCGCGCTGCATCGCGAGTTCCTCACGT
us22	F83	gcggtaccaacgcacatgtg	attattgctgaaccgccggaaccggaaccgctgccggaaccgggtccggttggcgtcctggccGAACGCAGCGCGGAGCTGTTGGTCTTATCCGGGAAGAGTGAGGGCGCTCTGGACGCTCAGGCAGCCCGCTTACGCGAGCACTTAGACATGCACCCTGAGCTGGGACTTGGGGACGTGGCATTCTCTCTGGCTACTACCCGCTCAGCTATGAACCACCGTTTAGCGGTAGCTGTCACATCGCGCGAAGGACTTCTGGCCGCTTTGTCCGCCGTAGCCCAAGGCCAGACACCTCCGGGAGCCGCGCGC	TGCATCGCGAGTTCCTCACGT	gcggtaccaacgcacatgtgattattgctgaaccgccggaaccggaaccgctgccggaaccgggtccggttggcgtcctggccGAACGCAGCGCGGAGCTGTTGGTCTTATCCGGGAAGAGTGAGGGCGCTCTGGACGCTCAGGCAGCCCGCTTACGCGAGCACTTAGACATGCACCCTGAGCTGGGACTTGGGGACGTGGCATTCTCTCTGGCTACTACCCGCTCAGCTATGAACCACCGTTTAGCGGTAGCTGTCACATCGCGCGAAGGACTTCTGGCCGCTTTGTCCGCCGTAGCCCAAGGCCAGACACCTCCGGGAGCCGCGCGCTGCATCGCGAGTTCCTCACGT	350	gcggtaccaacgcacatgtgattattgctgaaccgccggaaccggaaccgctgccggaaccgggtccggttggcgtcctggccGAACGCAGCGCGGAGCTGTTGGTCTTATCCGGGAAGAGTGAGGGCGCTCTGGACGCTCAGGCAGCCCGCTTACGCGAGCACTTAGACATGCACCCTGAGCTGGGACTTGGGGACGTGGCATTCTCTCTGGCTACTACCCGCTCAGCTATGAACCACCGTTTAGCGGTAGCTGTCACATCGCGCGAAGGACTTCTGGCCGCTTTGTCCGCCGTAGCCCAAGGCCAGACACCTCCGGGAGCCGCGCGCTGCATCGCGAGTTCCTCACGT
us21	F84	gcggtaccaacgcacatgtg	attattgctgaaccgccggaaccggaaccgctgccggaaccgggtccggttggcgtcctgGAACGCAGCGCGGAGCTGTTGGTCTTATCCGGGAAGAGTGAGGGCGCTCTGGACGCTCAGGCAGCCCGCTTACGCGAGCACTTAGACATGCACCCTGAGCTGGGACTTGGGGACGTGGCATTCTCTCTGGCTACTACCCGCTCAGCTATGAACCACCGTTTAGCGGTAGCTGTCACATCGCGCGAAGGACTTCTGGCCGCTTTGTCCGCCGTAGCCCAAGGCCAGACACCTCCGGGAGCCGCGCGC	TGCATCGCGAGTTCCTCACGT	gcggtaccaacgcacatgtgattattgctgaaccgccggaaccggaaccgctgccggaaccgggtccggttggcgtcctgGAACGCAGCGCGGAGCTGTTGGTCTTATCCGGGAAGAGTGAGGGCGCTCTGGACGCTCAGGCAGCCCGCTTACGCGAGCACTTAGACATGCACCCTGAGCTGGGACTTGGGGACGTGGCATTCTCTCTGGCTACTACCCGCTCAGCTATGAACCACCGTTTAGCGGTAGCTGTCACATCGCGCGAAGGACTTCTGGCCGCTTTGTCCGCCGTAGCCCAAGGCCAGACACCTCCGGGAGCCGCGCGCTGCATCGCGAGTTCCTCACGT	347	gcggtaccaacgcacatgtgattattgctgaaccgccggaaccggaaccgctgccggaaccgggtccggttggcgtcctgGAACGCAGCGCGGAGCTGTTGGTCTTATCCGGGAAGAGTGAGGGCGCTCTGGACGCTCAGGCAGCCCGCTTACGCGAGCACTTAGACATGCACCCTGAGCTGGGACTTGGGGACGTGGCATTCTCTCTGGCTACTACCCGCTCAGCTATGAACCACCGTTTAGCGGTAGCTGTCACATCGCGCGAAGGACTTCTGGCCGCTTTGTCCGCCGTAGCCCAAGGCCAGACACCTCCGGGAGCCGCGCGCTGCATCGCGAGTTCCTCACGT
us20	F85	gcggtaccaacgcacatgtg	attattgctgaaccgccggaaccggaaccgctgccggaaccgggtccggttggcgtcGAACGCAGCGCGGAGCTGTTGGTCTTATCCGGGAAGAGTGAGGGCGCTCTGGACGCTCAGGCAGCCCGCTTACGCGAGCACTTAGACATGCACCCTGAGCTGGGACTTGGGGACGTGGCATTCTCTCTGGCTACTACCCGCTCAGCTATGAACCACCGTTTAGCGGTAGCTGTCACATCGCGCGAAGGACTTCTGGCCGCTTTGTCCGCCGTAGCCCAAGGCCAGACACCTCCGGGAGCCGCGCGC	TGCATCGCGAGTTCCTCACGT	gcggtaccaacgcacatgtgattattgctgaaccgccggaaccggaaccgctgccggaaccgggtccggttggcgtcGAACGCAGCGCGGAGCTGTTGGTCTTATCCGGGAAGAGTGAGGGCGCTCTGGACGCTCAGGCAGCCCGCTTACGCGAGCACTTAGACATGCACCCTGAGCTGGGACTTGGGGACGTGGCATTCTCTCTGGCTACTACCCGCTCAGCTATGAACCACCGTTTAGCGGTAGCTGTCACATCGCGCGAAGGACTTCTGGCCGCTTTGTCCGCCGTAGCCCAAGGCCAGACACCTCCGGGAGCCGCGCGCTGCATCGCGAGTTCCTCACGT	344	gcggtaccaacgcacatgtgattattgctgaaccgccggaaccggaaccgctgccggaaccgggtccggttggcgtcGAACGCAGCGCGGAGCTGTTGGTCTTATCCGGGAAGAGTGAGGGCGCTCTGGACGCTCAGGCAGCCCGCTTACGCGAGCACTTAGACATGCACCCTGAGCTGGGACTTGGGGACGTGGCATTCTCTCTGGCTACTACCCGCTCAGCTATGAACCACCGTTTAGCGGTAGCTGTCACATCGCGCGAAGGACTTCTGGCCGCTTTGTCCGCCGTAGCCCAAGGCCAGACACCTCCGGGAGCCGCGCGCTGCATCGCGAGTTCCTCACGT
us19	F86	gcggtaccaacgcacatgtg	attattgctgaaccgccggaaccggaaccgctgccggaaccgggtccggttggcGAACGCAGCGCGGAGCTGTTGGTCTTATCCGGGAAGAGTGAGGGCGCTCTGGACGCTCAGGCAGCCCGCTTACGCGAGCACTTAGACATGCACCCTGAGCTGGGACTTGGGGACGTGGCATTCTCTCTGGCTACTACCCGCTCAGCTATGAACCACCGTTTAGCGGTAGCTGTCACATCGCGCGAAGGACTTCTGGCCGCTTTGTCCGCCGTAGCCCAAGGCCAGACACCTCCGGGAGCCGCGCGC	TGCATCGCGAGTTCCTCACGT	gcggtaccaacgcacatgtgattattgctgaaccgccggaaccggaaccgctgccggaaccgggtccggttggcGAACGCAGCGCGGAGCTGTTGGTCTTATCCGGGAAGAGTGAGGGCGCTCTGGACGCTCAGGCAGCCCGCTTACGCGAGCACTTAGACATGCACCCTGAGCTGGGACTTGGGGACGTGGCATTCTCTCTGGCTACTACCCGCTCAGCTATGAACCACCGTTTAGCGGTAGCTGTCACATCGCGCGAAGGACTTCTGGCCGCTTTGTCCGCCGTAGCCCAAGGCCAGACACCTCCGGGAGCCGCGCGCTGCATCGCGAGTTCCTCACGT	341	gcggtaccaacgcacatgtgattattgctgaaccgccggaaccggaaccgctgccggaaccgggtccggttggcGAACGCAGCGCGGAGCTGTTGGTCTTATCCGGGAAGAGTGAGGGCGCTCTGGACGCTCAGGCAGCCCGCTTACGCGAGCACTTAGACATGCACCCTGAGCTGGGACTTGGGGACGTGGCATTCTCTCTGGCTACTACCCGCTCAGCTATGAACCACCGTTTAGCGGTAGCTGTCACATCGCGCGAAGGACTTCTGGCCGCTTTGTCCGCCGTAGCCCAAGGCCAGACACCTCCGGGAGCCGCGCGCTGCATCGCGAGTTCCTCACGT
us18	F87	gcggtaccaacgcacatgtg	attattgctgaaccgccggaaccggaaccgctgccggaaccgggtccggttGAACGCAGCGCGGAGCTGTTGGTCTTATCCGGGAAGAGTGAGGGCGCTCTGGACGCTCAGGCAGCCCGCTTACGCGAGCACTTAGACATGCACCCTGAGCTGGGACTTGGGGACGTGGCATTCTCTCTGGCTACTACCCGCTCAGCTATGAACCACCGTTTAGCGGTAGCTGTCACATCGCGCGAAGGACTTCTGGCCGCTTTGTCCGCCGTAGCCCAAGGCCAGACACCTCCGGGAGCCGCGCGC	TGCATCGCGAGTTCCTCACGT	gcggtaccaacgcacatgtgattattgctgaaccgccggaaccggaaccgctgccggaaccgggtccggttGAACGCAGCGCGGAGCTGTTGGTCTTATCCGGGAAGAGTGAGGGCGCTCTGGACGCTCAGGCAGCCCGCTTACGCGAGCACTTAGACATGCACCCTGAGCTGGGACTTGGGGACGTGGCATTCTCTCTGGCTACTACCCGCTCAGCTATGAACCACCGTTTAGCGGTAGCTGTCACATCGCGCGAAGGACTTCTGGCCGCTTTGTCCGCCGTAGCCCAAGGCCAGACACCTCCGGGAGCCGCGCGCTGCATCGCGAGTTCCTCACGT	338	gcggtaccaacgcacatgtgattattgctgaaccgccggaaccggaaccgctgccggaaccgggtccggttGAACGCAGCGCGGAGCTGTTGGTCTTATCCGGGAAGAGTGAGGGCGCTCTGGACGCTCAGGCAGCCCGCTTACGCGAGCACTTAGACATGCACCCTGAGCTGGGACTTGGGGACGTGGCATTCTCTCTGGCTACTACCCGCTCAGCTATGAACCACCGTTTAGCGGTAGCTGTCACATCGCGCGAAGGACTTCTGGCCGCTTTGTCCGCCGTAGCCCAAGGCCAGACACCTCCGGGAGCCGCGCGCTGCATCGCGAGTTCCTCACGT
us17	F88	gcggtaccaacgcacatgtg	attattgctgaaccgccggaaccggaaccgctgccggaaccgggtccgGAACGCAGCGCGGAGCTGTTGGTCTTATCCGGGAAGAGTGAGGGCGCTCTGGACGCTCAGGCAGCCCGCTTACGCGAGCACTTAGACATGCACCCTGAGCTGGGACTTGGGGACGTGGCATTCTCTCTGGCTACTACCCGCTCAGCTATGAACCACCGTTTAGCGGTAGCTGTCACATCGCGCGAAGGACTTCTGGCCGCTTTGTCCGCCGTAGCCCAAGGCCAGACACCTCCGGGAGCCGCGCGC	TGCATCGCGAGTTCCTCACGT	gcggtaccaacgcacatgtgattattgctgaaccgccggaaccggaaccgctgccggaaccgggtccgGAACGCAGCGCGGAGCTGTTGGTCTTATCCGGGAAGAGTGAGGGCGCTCTGGACGCTCAGGCAGCCCGCTTACGCGAGCACTTAGACATGCACCCTGAGCTGGGACTTGGGGACGTGGCATTCTCTCTGGCTACTACCCGCTCAGCTATGAACCACCGTTTAGCGGTAGCTGTCACATCGCGCGAAGGACTTCTGGCCGCTTTGTCCGCCGTAGCCCAAGGCCAGACACCTCCGGGAGCCGCGCGCTGCATCGCGAGTTCCTCACGT	335	gcggtaccaacgcacatgtgattattgctgaaccgccggaaccggaaccgctgccggaaccgggtccgGAACGCAGCGCGGAGCTGTTGGTCTTATCCGGGAAGAGTGAGGGCGCTCTGGACGCTCAGGCAGCCCGCTTACGCGAGCACTTAGACATGCACCCTGAGCTGGGACTTGGGGACGTGGCATTCTCTCTGGCTACTACCCGCTCAGCTATGAACCACCGTTTAGCGGTAGCTGTCACATCGCGCGAAGGACTTCTGGCCGCTTTGTCCGCCGTAGCCCAAGGCCAGACACCTCCGGGAGCCGCGCGCTGCATCGCGAGTTCCTCACGT
us16	F89	gcggtaccaacgcacatgtg	attattgctgaaccgccggaaccggaaccgctgccggaaccgggtGAACGCAGCGCGGAGCTGTTGGTCTTATCCGGGAAGAGTGAGGGCGCTCTGGACGCTCAGGCAGCCCGCTTACGCGAGCACTTAGACATGCACCCTGAGCTGGGACTTGGGGACGTGGCATTCTCTCTGGCTACTACCCGCTCAGCTATGAACCACCGTTTAGCGGTAGCTGTCACATCGCGCGAAGGACTTCTGGCCGCTTTGTCCGCCGTAGCCCAAGGCCAGACACCTCCGGGAGCCGCGCGC	TGCATCGCGAGTTCCTCACGT	gcggtaccaacgcacatgtgattattgctgaaccgccggaaccggaaccgctgccggaaccgggtGAACGCAGCGCGGAGCTGTTGGTCTTATCCGGGAAGAGTGAGGGCGCTCTGGACGCTCAGGCAGCCCGCTTACGCGAGCACTTAGACATGCACCCTGAGCTGGGACTTGGGGACGTGGCATTCTCTCTGGCTACTACCCGCTCAGCTATGAACCACCGTTTAGCGGTAGCTGTCACATCGCGCGAAGGACTTCTGGCCGCTTTGTCCGCCGTAGCCCAAGGCCAGACACCTCCGGGAGCCGCGCGCTGCATCGCGAGTTCCTCACGT	332	gcggtaccaacgcacatgtgattattgctgaaccgccggaaccggaaccgctgccggaaccgggtGAACGCAGCGCGGAGCTGTTGGTCTTATCCGGGAAGAGTGAGGGCGCTCTGGACGCTCAGGCAGCCCGCTTACGCGAGCACTTAGACATGCACCCTGAGCTGGGACTTGGGGACGTGGCATTCTCTCTGGCTACTACCCGCTCAGCTATGAACCACCGTTTAGCGGTAGCTGTCACATCGCGCGAAGGACTTCTGGCCGCTTTGTCCGCCGTAGCCCAAGGCCAGACACCTCCGGGAGCCGCGCGCTGCATCGCGAGTTCCTCACGT
us15	F90	gcggtaccaacgcacatgtg	attattgctgaaccgccggaaccggaaccgctgccggaaccgCCAGAACGCAGCGCGGAGCTGTTGGTCTTATCCGGGAAGAGTGAGGGCGCTCTGGACGCTCAGGCAGCCCGCTTACGCGAGCACTTAGACATGCACCCTGAGCTGGGACTTGGGGACGTGGCATTCTCTCTGGCTACTACCCGCTCAGCTATGAACCACCGTTTAGCGGTAGCTGTCACATCGCGCGAAGGACTTCTGGCCGCTTTGTCCGCCGTAGCCCAAGGCCAGACACCTCCGGGAGCCGCGCGC	TGCATCGCGAGTTCCTCACGT	gcggtaccaacgcacatgtgattattgctgaaccgccggaaccggaaccgctgccggaaccgCCAGAACGCAGCGCGGAGCTGTTGGTCTTATCCGGGAAGAGTGAGGGCGCTCTGGACGCTCAGGCAGCCCGCTTACGCGAGCACTTAGACATGCACCCTGAGCTGGGACTTGGGGACGTGGCATTCTCTCTGGCTACTACCCGCTCAGCTATGAACCACCGTTTAGCGGTAGCTGTCACATCGCGCGAAGGACTTCTGGCCGCTTTGTCCGCCGTAGCCCAAGGCCAGACACCTCCGGGAGCCGCGCGCTGCATCGCGAGTTCCTCACGT	332	gcggtaccaacgcacatgtgattattgctgaaccgccggaaccggaaccgctgccggaaccgCCAGAACGCAGCGCGGAGCTGTTGGTCTTATCCGGGAAGAGTGAGGGCGCTCTGGACGCTCAGGCAGCCCGCTTACGCGAGCACTTAGACATGCACCCTGAGCTGGGACTTGGGGACGTGGCATTCTCTCTGGCTACTACCCGCTCAGCTATGAACCACCGTTTAGCGGTAGCTGTCACATCGCGCGAAGGACTTCTGGCCGCTTTGTCCGCCGTAGCCCAAGGCCAGACACCTCCGGGAGCCGCGCGCTGCATCGCGAGTTCCTCACGT
us14	F91	gcggtaccaacgcacatgtg	attattgctgaaccgccggaaccggaaccgctgccggaaGCACCAGAACGCAGCGCGGAGCTGTTGGTCTTATCCGGGAAGAGTGAGGGCGCTCTGGACGCTCAGGCAGCCCGCTTACGCGAGCACTTAGACATGCACCCTGAGCTGGGACTTGGGGACGTGGCATTCTCTCTGGCTACTACCCGCTCAGCTATGAACCACCGTTTAGCGGTAGCTGTCACATCGCGCGAAGGACTTCTGGCCGCTTTGTCCGCCGTAGCCCAAGGCCAGACACCTCCGGGAGCCGCGCGC	TGCATCGCGAGTTCCTCACGT	gcggtaccaacgcacatgtgattattgctgaaccgccggaaccggaaccgctgccggaaGCACCAGAACGCAGCGCGGAGCTGTTGGTCTTATCCGGGAAGAGTGAGGGCGCTCTGGACGCTCAGGCAGCCCGCTTACGCGAGCACTTAGACATGCACCCTGAGCTGGGACTTGGGGACGTGGCATTCTCTCTGGCTACTACCCGCTCAGCTATGAACCACCGTTTAGCGGTAGCTGTCACATCGCGCGAAGGACTTCTGGCCGCTTTGTCCGCCGTAGCCCAAGGCCAGACACCTCCGGGAGCCGCGCGCTGCATCGCGAGTTCCTCACGT	332	gcggtaccaacgcacatgtgattattgctgaaccgccggaaccggaaccgctgccggaaGCACCAGAACGCAGCGCGGAGCTGTTGGTCTTATCCGGGAAGAGTGAGGGCGCTCTGGACGCTCAGGCAGCCCGCTTACGCGAGCACTTAGACATGCACCCTGAGCTGGGACTTGGGGACGTGGCATTCTCTCTGGCTACTACCCGCTCAGCTATGAACCACCGTTTAGCGGTAGCTGTCACATCGCGCGAAGGACTTCTGGCCGCTTTGTCCGCCGTAGCCCAAGGCCAGACACCTCCGGGAGCCGCGCGCTGCATCGCGAGTTCCTCACGT
us13	F92	gcggtaccaacgcacatgtg	attattgctgaaccgccggaaccggaaccgctgccgGCCGCACCAGAACGCAGCGCGGAGCTGTTGGTCTTATCCGGGAAGAGTGAGGGCGCTCTGGACGCTCAGGCAGCCCGCTTACGCGAGCACTTAGACATGCACCCTGAGCTGGGACTTGGGGACGTGGCATTCTCTCTGGCTACTACCCGCTCAGCTATGAACCACCGTTTAGCGGTAGCTGTCACATCGCGCGAAGGACTTCTGGCCGCTTTGTCCGCCGTAGCCCAAGGCCAGACACCTCCGGGAGCCGCGCGC	TGCATCGCGAGTTCCTCACGT	gcggtaccaacgcacatgtgattattgctgaaccgccggaaccggaaccgctgccgGCCGCACCAGAACGCAGCGCGGAGCTGTTGGTCTTATCCGGGAAGAGTGAGGGCGCTCTGGACGCTCAGGCAGCCCGCTTACGCGAGCACTTAGACATGCACCCTGAGCTGGGACTTGGGGACGTGGCATTCTCTCTGGCTACTACCCGCTCAGCTATGAACCACCGTTTAGCGGTAGCTGTCACATCGCGCGAAGGACTTCTGGCCGCTTTGTCCGCCGTAGCCCAAGGCCAGACACCTCCGGGAGCCGCGCGCTGCATCGCGAGTTCCTCACGT	332	gcggtaccaacgcacatgtgattattgctgaaccgccggaaccggaaccgctgccgGCCGCACCAGAACGCAGCGCGGAGCTGTTGGTCTTATCCGGGAAGAGTGAGGGCGCTCTGGACGCTCAGGCAGCCCGCTTACGCGAGCACTTAGACATGCACCCTGAGCTGGGACTTGGGGACGTGGCATTCTCTCTGGCTACTACCCGCTCAGCTATGAACCACCGTTTAGCGGTAGCTGTCACATCGCGCGAAGGACTTCTGGCCGCTTTGTCCGCCGTAGCCCAAGGCCAGACACCTCCGGGAGCCGCGCGCTGCATCGCGAGTTCCTCACGT
us12	F93	gcggtaccaacgcacatgtg	attattgctgaaccgccggaaccggaaccgctgCCAGCCGCACCAGAACGCAGCGCGGAGCTGTTGGTCTTATCCGGGAAGAGTGAGGGCGCTCTGGACGCTCAGGCAGCCCGCTTACGCGAGCACTTAGACATGCACCCTGAGCTGGGACTTGGGGACGTGGCATTCTCTCTGGCTACTACCCGCTCAGCTATGAACCACCGTTTAGCGGTAGCTGTCACATCGCGCGAAGGACTTCTGGCCGCTTTGTCCGCCGTAGCCCAAGGCCAGACACCTCCGGGAGCCGCGCGC	TGCATCGCGAGTTCCTCACGT	gcggtaccaacgcacatgtgattattgctgaaccgccggaaccggaaccgctgCCAGCCGCACCAGAACGCAGCGCGGAGCTGTTGGTCTTATCCGGGAAGAGTGAGGGCGCTCTGGACGCTCAGGCAGCCCGCTTACGCGAGCACTTAGACATGCACCCTGAGCTGGGACTTGGGGACGTGGCATTCTCTCTGGCTACTACCCGCTCAGCTATGAACCACCGTTTAGCGGTAGCTGTCACATCGCGCGAAGGACTTCTGGCCGCTTTGTCCGCCGTAGCCCAAGGCCAGACACCTCCGGGAGCCGCGCGCTGCATCGCGAGTTCCTCACGT	332	gcggtaccaacgcacatgtgattattgctgaaccgccggaaccggaaccgctgCCAGCCGCACCAGAACGCAGCGCGGAGCTGTTGGTCTTATCCGGGAAGAGTGAGGGCGCTCTGGACGCTCAGGCAGCCCGCTTACGCGAGCACTTAGACATGCACCCTGAGCTGGGACTTGGGGACGTGGCATTCTCTCTGGCTACTACCCGCTCAGCTATGAACCACCGTTTAGCGGTAGCTGTCACATCGCGCGAAGGACTTCTGGCCGCTTTGTCCGCCGTAGCCCAAGGCCAGACACCTCCGGGAGCCGCGCGCTGCATCGCGAGTTCCTCACGT
us11	F94	gcggtaccaacgcacatgtg	attattgctgaaccgccggaaccggaaccgTGGCCAGCCGCACCAGAACGCAGCGCGGAGCTGTTGGTCTTATCCGGGAAGAGTGAGGGCGCTCTGGACGCTCAGGCAGCCCGCTTACGCGAGCACTTAGACATGCACCCTGAGCTGGGACTTGGGGACGTGGCATTCTCTCTGGCTACTACCCGCTCAGCTATGAACCACCGTTTAGCGGTAGCTGTCACATCGCGCGAAGGACTTCTGGCCGCTTTGTCCGCCGTAGCCCAAGGCCAGACACCTCCGGGAGCCGCGCGC	TGCATCGCGAGTTCCTCACGT	gcggtaccaacgcacatgtgattattgctgaaccgccggaaccggaaccgTGGCCAGCCGCACCAGAACGCAGCGCGGAGCTGTTGGTCTTATCCGGGAAGAGTGAGGGCGCTCTGGACGCTCAGGCAGCCCGCTTACGCGAGCACTTAGACATGCACCCTGAGCTGGGACTTGGGGACGTGGCATTCTCTCTGGCTACTACCCGCTCAGCTATGAACCACCGTTTAGCGGTAGCTGTCACATCGCGCGAAGGACTTCTGGCCGCTTTGTCCGCCGTAGCCCAAGGCCAGACACCTCCGGGAGCCGCGCGCTGCATCGCGAGTTCCTCACGT	332	gcggtaccaacgcacatgtgattattgctgaaccgccggaaccggaaccgTGGCCAGCCGCACCAGAACGCAGCGCGGAGCTGTTGGTCTTATCCGGGAAGAGTGAGGGCGCTCTGGACGCTCAGGCAGCCCGCTTACGCGAGCACTTAGACATGCACCCTGAGCTGGGACTTGGGGACGTGGCATTCTCTCTGGCTACTACCCGCTCAGCTATGAACCACCGTTTAGCGGTAGCTGTCACATCGCGCGAAGGACTTCTGGCCGCTTTGTCCGCCGTAGCCCAAGGCCAGACACCTCCGGGAGCCGCGCGCTGCATCGCGAGTTCCTCACGT
us10	F95	gcggtaccaacgcacatgtg	attattgctgaaccgccggaaccggaaTTGTGGCCAGCCGCACCAGAACGCAGCGCGGAGCTGTTGGTCTTATCCGGGAAGAGTGAGGGCGCTCTGGACGCTCAGGCAGCCCGCTTACGCGAGCACTTAGACATGCACCCTGAGCTGGGACTTGGGGACGTGGCATTCTCTCTGGCTACTACCCGCTCAGCTATGAACCACCGTTTAGCGGTAGCTGTCACATCGCGCGAAGGACTTCTGGCCGCTTTGTCCGCCGTAGCCCAAGGCCAGACACCTCCGGGAGCCGCGCGC	TGCATCGCGAGTTCCTCACGT	gcggtaccaacgcacatgtgattattgctgaaccgccggaaccggaaTTGTGGCCAGCCGCACCAGAACGCAGCGCGGAGCTGTTGGTCTTATCCGGGAAGAGTGAGGGCGCTCTGGACGCTCAGGCAGCCCGCTTACGCGAGCACTTAGACATGCACCCTGAGCTGGGACTTGGGGACGTGGCATTCTCTCTGGCTACTACCCGCTCAGCTATGAACCACCGTTTAGCGGTAGCTGTCACATCGCGCGAAGGACTTCTGGCCGCTTTGTCCGCCGTAGCCCAAGGCCAGACACCTCCGGGAGCCGCGCGCTGCATCGCGAGTTCCTCACGT	332	gcggtaccaacgcacatgtgattattgctgaaccgccggaaccggaaTTGTGGCCAGCCGCACCAGAACGCAGCGCGGAGCTGTTGGTCTTATCCGGGAAGAGTGAGGGCGCTCTGGACGCTCAGGCAGCCCGCTTACGCGAGCACTTAGACATGCACCCTGAGCTGGGACTTGGGGACGTGGCATTCTCTCTGGCTACTACCCGCTCAGCTATGAACCACCGTTTAGCGGTAGCTGTCACATCGCGCGAAGGACTTCTGGCCGCTTTGTCCGCCGTAGCCCAAGGCCAGACACCTCCGGGAGCCGCGCGCTGCATCGCGAGTTCCTCACGT
us9	F96	gcggtaccaacgcacatgtg	attattgctgaaccgccggaaccgGAATTGTGGCCAGCCGCACCAGAACGCAGCGCGGAGCTGTTGGTCTTATCCGGGAAGAGTGAGGGCGCTCTGGACGCTCAGGCAGCCCGCTTACGCGAGCACTTAGACATGCACCCTGAGCTGGGACTTGGGGACGTGGCATTCTCTCTGGCTACTACCCGCTCAGCTATGAACCACCGTTTAGCGGTAGCTGTCACATCGCGCGAAGGACTTCTGGCCGCTTTGTCCGCCGTAGCCCAAGGCCAGACACCTCCGGGAGCCGCGCGC	TGCATCGCGAGTTCCTCACGT	gcggtaccaacgcacatgtgattattgctgaaccgccggaaccgGAATTGTGGCCAGCCGCACCAGAACGCAGCGCGGAGCTGTTGGTCTTATCCGGGAAGAGTGAGGGCGCTCTGGACGCTCAGGCAGCCCGCTTACGCGAGCACTTAGACATGCACCCTGAGCTGGGACTTGGGGACGTGGCATTCTCTCTGGCTACTACCCGCTCAGCTATGAACCACCGTTTAGCGGTAGCTGTCACATCGCGCGAAGGACTTCTGGCCGCTTTGTCCGCCGTAGCCCAAGGCCAGACACCTCCGGGAGCCGCGCGCTGCATCGCGAGTTCCTCACGT	332	gcggtaccaacgcacatgtgattattgctgaaccgccggaaccgGAATTGTGGCCAGCCGCACCAGAACGCAGCGCGGAGCTGTTGGTCTTATCCGGGAAGAGTGAGGGCGCTCTGGACGCTCAGGCAGCCCGCTTACGCGAGCACTTAGACATGCACCCTGAGCTGGGACTTGGGGACGTGGCATTCTCTCTGGCTACTACCCGCTCAGCTATGAACCACCGTTTAGCGGTAGCTGTCACATCGCGCGAAGGACTTCTGGCCGCTTTGTCCGCCGTAGCCCAAGGCCAGACACCTCCGGGAGCCGCGCGCTGCATCGCGAGTTCCTCACGT
us8	F97	gcggtaccaacgcacatgtg	attattgctgaaccgccggaaGTGGAATTGTGGCCAGCCGCACCAGAACGCAGCGCGGAGCTGTTGGTCTTATCCGGGAAGAGTGAGGGCGCTCTGGACGCTCAGGCAGCCCGCTTACGCGAGCACTTAGACATGCACCCTGAGCTGGGACTTGGGGACGTGGCATTCTCTCTGGCTACTACCCGCTCAGCTATGAACCACCGTTTAGCGGTAGCTGTCACATCGCGCGAAGGACTTCTGGCCGCTTTGTCCGCCGTAGCCCAAGGCCAGACACCTCCGGGAGCCGCGCGC	TGCATCGCGAGTTCCTCACGT	gcggtaccaacgcacatgtgattattgctgaaccgccggaaGTGGAATTGTGGCCAGCCGCACCAGAACGCAGCGCGGAGCTGTTGGTCTTATCCGGGAAGAGTGAGGGCGCTCTGGACGCTCAGGCAGCCCGCTTACGCGAGCACTTAGACATGCACCCTGAGCTGGGACTTGGGGACGTGGCATTCTCTCTGGCTACTACCCGCTCAGCTATGAACCACCGTTTAGCGGTAGCTGTCACATCGCGCGAAGGACTTCTGGCCGCTTTGTCCGCCGTAGCCCAAGGCCAGACACCTCCGGGAGCCGCGCGCTGCATCGCGAGTTCCTCACGT	332	gcggtaccaacgcacatgtgattattgctgaaccgccggaaGTGGAATTGTGGCCAGCCGCACCAGAACGCAGCGCGGAGCTGTTGGTCTTATCCGGGAAGAGTGAGGGCGCTCTGGACGCTCAGGCAGCCCGCTTACGCGAGCACTTAGACATGCACCCTGAGCTGGGACTTGGGGACGTGGCATTCTCTCTGGCTACTACCCGCTCAGCTATGAACCACCGTTTAGCGGTAGCTGTCACATCGCGCGAAGGACTTCTGGCCGCTTTGTCCGCCGTAGCCCAAGGCCAGACACCTCCGGGAGCCGCGCGCTGCATCGCGAGTTCCTCACGT
us7	F98	gcggtaccaacgcacatgtg	attattgctgaaccgccgGCGGTGGAATTGTGGCCAGCCGCACCAGAACGCAGCGCGGAGCTGTTGGTCTTATCCGGGAAGAGTGAGGGCGCTCTGGACGCTCAGGCAGCCCGCTTACGCGAGCACTTAGACATGCACCCTGAGCTGGGACTTGGGGACGTGGCATTCTCTCTGGCTACTACCCGCTCAGCTATGAACCACCGTTTAGCGGTAGCTGTCACATCGCGCGAAGGACTTCTGGCCGCTTTGTCCGCCGTAGCCCAAGGCCAGACACCTCCGGGAGCCGCGCGC	TGCATCGCGAGTTCCTCACGT	gcggtaccaacgcacatgtgattattgctgaaccgccgGCGGTGGAATTGTGGCCAGCCGCACCAGAACGCAGCGCGGAGCTGTTGGTCTTATCCGGGAAGAGTGAGGGCGCTCTGGACGCTCAGGCAGCCCGCTTACGCGAGCACTTAGACATGCACCCTGAGCTGGGACTTGGGGACGTGGCATTCTCTCTGGCTACTACCCGCTCAGCTATGAACCACCGTTTAGCGGTAGCTGTCACATCGCGCGAAGGACTTCTGGCCGCTTTGTCCGCCGTAGCCCAAGGCCAGACACCTCCGGGAGCCGCGCGCTGCATCGCGAGTTCCTCACGT	332	gcggtaccaacgcacatgtgattattgctgaaccgccgGCGGTGGAATTGTGGCCAGCCGCACCAGAACGCAGCGCGGAGCTGTTGGTCTTATCCGGGAAGAGTGAGGGCGCTCTGGACGCTCAGGCAGCCCGCTTACGCGAGCACTTAGACATGCACCCTGAGCTGGGACTTGGGGACGTGGCATTCTCTCTGGCTACTACCCGCTCAGCTATGAACCACCGTTTAGCGGTAGCTGTCACATCGCGCGAAGGACTTCTGGCCGCTTTGTCCGCCGTAGCCCAAGGCCAGACACCTCCGGGAGCCGCGCGCTGCATCGCGAGTTCCTCACGT
us6	F99	gcggtaccaacgcacatgtg	attattgctgaaccgCCGGCGGTGGAATTGTGGCCAGCCGCACCAGAACGCAGCGCGGAGCTGTTGGTCTTATCCGGGAAGAGTGAGGGCGCTCTGGACGCTCAGGCAGCCCGCTTACGCGAGCACTTAGACATGCACCCTGAGCTGGGACTTGGGGACGTGGCATTCTCTCTGGCTACTACCCGCTCAGCTATGAACCACCGTTTAGCGGTAGCTGTCACATCGCGCGAAGGACTTCTGGCCGCTTTGTCCGCCGTAGCCCAAGGCCAGACACCTCCGGGAGCCGCGCGC	TGCATCGCGAGTTCCTCACGT	gcggtaccaacgcacatgtgattattgctgaaccgCCGGCGGTGGAATTGTGGCCAGCCGCACCAGAACGCAGCGCGGAGCTGTTGGTCTTATCCGGGAAGAGTGAGGGCGCTCTGGACGCTCAGGCAGCCCGCTTACGCGAGCACTTAGACATGCACCCTGAGCTGGGACTTGGGGACGTGGCATTCTCTCTGGCTACTACCCGCTCAGCTATGAACCACCGTTTAGCGGTAGCTGTCACATCGCGCGAAGGACTTCTGGCCGCTTTGTCCGCCGTAGCCCAAGGCCAGACACCTCCGGGAGCCGCGCGCTGCATCGCGAGTTCCTCACGT	332	gcggtaccaacgcacatgtgattattgctgaaccgCCGGCGGTGGAATTGTGGCCAGCCGCACCAGAACGCAGCGCGGAGCTGTTGGTCTTATCCGGGAAGAGTGAGGGCGCTCTGGACGCTCAGGCAGCCCGCTTACGCGAGCACTTAGACATGCACCCTGAGCTGGGACTTGGGGACGTGGCATTCTCTCTGGCTACTACCCGCTCAGCTATGAACCACCGTTTAGCGGTAGCTGTCACATCGCGCGAAGGACTTCTGGCCGCTTTGTCCGCCGTAGCCCAAGGCCAGACACCTCCGGGAGCCGCGCGCTGCATCGCGAGTTCCTCACGT
us5	F100	gcggtaccaacgcacatgtg	attattgctgaaGCCCCGGCGGTGGAATTGTGGCCAGCCGCACCAGAACGCAGCGCGGAGCTGTTGGTCTTATCCGGGAAGAGTGAGGGCGCTCTGGACGCTCAGGCAGCCCGCTTACGCGAGCACTTAGACATGCACCCTGAGCTGGGACTTGGGGACGTGGCATTCTCTCTGGCTACTACCCGCTCAGCTATGAACCACCGTTTAGCGGTAGCTGTCACATCGCGCGAAGGACTTCTGGCCGCTTTGTCCGCCGTAGCCCAAGGCCAGACACCTCCGGGAGCCGCGCGC	TGCATCGCGAGTTCCTCACGT	gcggtaccaacgcacatgtgattattgctgaaGCCCCGGCGGTGGAATTGTGGCCAGCCGCACCAGAACGCAGCGCGGAGCTGTTGGTCTTATCCGGGAAGAGTGAGGGCGCTCTGGACGCTCAGGCAGCCCGCTTACGCGAGCACTTAGACATGCACCCTGAGCTGGGACTTGGGGACGTGGCATTCTCTCTGGCTACTACCCGCTCAGCTATGAACCACCGTTTAGCGGTAGCTGTCACATCGCGCGAAGGACTTCTGGCCGCTTTGTCCGCCGTAGCCCAAGGCCAGACACCTCCGGGAGCCGCGCGCTGCATCGCGAGTTCCTCACGT	332	gcggtaccaacgcacatgtgattattgctgaaGCCCCGGCGGTGGAATTGTGGCCAGCCGCACCAGAACGCAGCGCGGAGCTGTTGGTCTTATCCGGGAAGAGTGAGGGCGCTCTGGACGCTCAGGCAGCCCGCTTACGCGAGCACTTAGACATGCACCCTGAGCTGGGACTTGGGGACGTGGCATTCTCTCTGGCTACTACCCGCTCAGCTATGAACCACCGTTTAGCGGTAGCTGTCACATCGCGCGAAGGACTTCTGGCCGCTTTGTCCGCCGTAGCCCAAGGCCAGACACCTCCGGGAGCCGCGCGCTGCATCGCGAGTTCCTCACGT
us4	F101	gcggtaccaacgcacatgtg	attattgctGAGGCCCCGGCGGTGGAATTGTGGCCAGCCGCACCAGAACGCAGCGCGGAGCTGTTGGTCTTATCCGGGAAGAGTGAGGGCGCTCTGGACGCTCAGGCAGCCCGCTTACGCGAGCACTTAGACATGCACCCTGAGCTGGGACTTGGGGACGTGGCATTCTCTCTGGCTACTACCCGCTCAGCTATGAACCACCGTTTAGCGGTAGCTGTCACATCGCGCGAAGGACTTCTGGCCGCTTTGTCCGCCGTAGCCCAAGGCCAGACACCTCCGGGAGCCGCGCGC	TGCATCGCGAGTTCCTCACGT	gcggtaccaacgcacatgtgattattgctGAGGCCCCGGCGGTGGAATTGTGGCCAGCCGCACCAGAACGCAGCGCGGAGCTGTTGGTCTTATCCGGGAAGAGTGAGGGCGCTCTGGACGCTCAGGCAGCCCGCTTACGCGAGCACTTAGACATGCACCCTGAGCTGGGACTTGGGGACGTGGCATTCTCTCTGGCTACTACCCGCTCAGCTATGAACCACCGTTTAGCGGTAGCTGTCACATCGCGCGAAGGACTTCTGGCCGCTTTGTCCGCCGTAGCCCAAGGCCAGACACCTCCGGGAGCCGCGCGCTGCATCGCGAGTTCCTCACGT	332	gcggtaccaacgcacatgtgattattgctGAGGCCCCGGCGGTGGAATTGTGGCCAGCCGCACCAGAACGCAGCGCGGAGCTGTTGGTCTTATCCGGGAAGAGTGAGGGCGCTCTGGACGCTCAGGCAGCCCGCTTACGCGAGCACTTAGACATGCACCCTGAGCTGGGACTTGGGGACGTGGCATTCTCTCTGGCTACTACCCGCTCAGCTATGAACCACCGTTTAGCGGTAGCTGTCACATCGCGCGAAGGACTTCTGGCCGCTTTGTCCGCCGTAGCCCAAGGCCAGACACCTCCGGGAGCCGCGCGCTGCATCGCGAGTTCCTCACGT
us3	F102	gcggtaccaacgcacatgtg	attattGAAGAGGCCCCGGCGGTGGAATTGTGGCCAGCCGCACCAGAACGCAGCGCGGAGCTGTTGGTCTTATCCGGGAAGAGTGAGGGCGCTCTGGACGCTCAGGCAGCCCGCTTACGCGAGCACTTAGACATGCACCCTGAGCTGGGACTTGGGGACGTGGCATTCTCTCTGGCTACTACCCGCTCAGCTATGAACCACCGTTTAGCGGTAGCTGTCACATCGCGCGAAGGACTTCTGGCCGCTTTGTCCGCCGTAGCCCAAGGCCAGACACCTCCGGGAGCCGCGCGC	TGCATCGCGAGTTCCTCACGT	gcggtaccaacgcacatgtgattattGAAGAGGCCCCGGCGGTGGAATTGTGGCCAGCCGCACCAGAACGCAGCGCGGAGCTGTTGGTCTTATCCGGGAAGAGTGAGGGCGCTCTGGACGCTCAGGCAGCCCGCTTACGCGAGCACTTAGACATGCACCCTGAGCTGGGACTTGGGGACGTGGCATTCTCTCTGGCTACTACCCGCTCAGCTATGAACCACCGTTTAGCGGTAGCTGTCACATCGCGCGAAGGACTTCTGGCCGCTTTGTCCGCCGTAGCCCAAGGCCAGACACCTCCGGGAGCCGCGCGCTGCATCGCGAGTTCCTCACGT	332	gcggtaccaacgcacatgtgattattGAAGAGGCCCCGGCGGTGGAATTGTGGCCAGCCGCACCAGAACGCAGCGCGGAGCTGTTGGTCTTATCCGGGAAGAGTGAGGGCGCTCTGGACGCTCAGGCAGCCCGCTTACGCGAGCACTTAGACATGCACCCTGAGCTGGGACTTGGGGACGTGGCATTCTCTCTGGCTACTACCCGCTCAGCTATGAACCACCGTTTAGCGGTAGCTGTCACATCGCGCGAAGGACTTCTGGCCGCTTTGTCCGCCGTAGCCCAAGGCCAGACACCTCCGGGAGCCGCGCGCTGCATCGCGAGTTCCTCACGT
us2	F103	gcggtaccaacgcacatgtg	attTTAGAAGAGGCCCCGGCGGTGGAATTGTGGCCAGCCGCACCAGAACGCAGCGCGGAGCTGTTGGTCTTATCCGGGAAGAGTGAGGGCGCTCTGGACGCTCAGGCAGCCCGCTTACGCGAGCACTTAGACATGCACCCTGAGCTGGGACTTGGGGACGTGGCATTCTCTCTGGCTACTACCCGCTCAGCTATGAACCACCGTTTAGCGGTAGCTGTCACATCGCGCGAAGGACTTCTGGCCGCTTTGTCCGCCGTAGCCCAAGGCCAGACACCTCCGGGAGCCGCGCGC	TGCATCGCGAGTTCCTCACGT	gcggtaccaacgcacatgtgattTTAGAAGAGGCCCCGGCGGTGGAATTGTGGCCAGCCGCACCAGAACGCAGCGCGGAGCTGTTGGTCTTATCCGGGAAGAGTGAGGGCGCTCTGGACGCTCAGGCAGCCCGCTTACGCGAGCACTTAGACATGCACCCTGAGCTGGGACTTGGGGACGTGGCATTCTCTCTGGCTACTACCCGCTCAGCTATGAACCACCGTTTAGCGGTAGCTGTCACATCGCGCGAAGGACTTCTGGCCGCTTTGTCCGCCGTAGCCCAAGGCCAGACACCTCCGGGAGCCGCGCGCTGCATCGCGAGTTCCTCACGT	332	gcggtaccaacgcacatgtgattTTAGAAGAGGCCCCGGCGGTGGAATTGTGGCCAGCCGCACCAGAACGCAGCGCGGAGCTGTTGGTCTTATCCGGGAAGAGTGAGGGCGCTCTGGACGCTCAGGCAGCCCGCTTACGCGAGCACTTAGACATGCACCCTGAGCTGGGACTTGGGGACGTGGCATTCTCTCTGGCTACTACCCGCTCAGCTATGAACCACCGTTTAGCGGTAGCTGTCACATCGCGCGAAGGACTTCTGGCCGCTTTGTCCGCCGTAGCCCAAGGCCAGACACCTCCGGGAGCCGCGCGCTGCATCGCGAGTTCCTCACGT
us1	F104	gcggtaccaacgcacatgtg	GTTTTAGAAGAGGCCCCGGCGGTGGAATTGTGGCCAGCCGCACCAGAACGCAGCGCGGAGCTGTTGGTCTTATCCGGGAAGAGTGAGGGCGCTCTGGACGCTCAGGCAGCCCGCTTACGCGAGCACTTAGACATGCACCCTGAGCTGGGACTTGGGGACGTGGCATTCTCTCTGGCTACTACCCGCTCAGCTATGAACCACCGTTTAGCGGTAGCTGTCACATCGCGCGAAGGACTTCTGGCCGCTTTGTCCGCCGTAGCCCAAGGCCAGACACCTCCGGGAGCCGCGCGC	TGCATCGCGAGTTCCTCACGT	gcggtaccaacgcacatgtgGTTTTAGAAGAGGCCCCGGCGGTGGAATTGTGGCCAGCCGCACCAGAACGCAGCGCGGAGCTGTTGGTCTTATCCGGGAAGAGTGAGGGCGCTCTGGACGCTCAGGCAGCCCGCTTACGCGAGCACTTAGACATGCACCCTGAGCTGGGACTTGGGGACGTGGCATTCTCTCTGGCTACTACCCGCTCAGCTATGAACCACCGTTTAGCGGTAGCTGTCACATCGCGCGAAGGACTTCTGGCCGCTTTGTCCGCCGTAGCCCAAGGCCAGACACCTCCGGGAGCCGCGCGCTGCATCGCGAGTTCCTCACGT	332	gcggtaccaacgcacatgtgGTTTTAGAAGAGGCCCCGGCGGTGGAATTGTGGCCAGCCGCACCAGAACGCAGCGCGGAGCTGTTGGTCTTATCCGGGAAGAGTGAGGGCGCTCTGGACGCTCAGGCAGCCCGCTTACGCGAGCACTTAGACATGCACCCTGAGCTGGGACTTGGGGACGTGGCATTCTCTCTGGCTACTACCCGCTCAGCTATGAACCACCGTTTAGCGGTAGCTGTCACATCGCGCGAAGGACTTCTGGCCGCTTTGTCCGCCGTAGCCCAAGGCCAGACACCTCCGGGAGCCGCGCGCTGCATCGCGAGTTCCTCACGT

## Sheet: Reverse
							Sequences in red gave duplicate sequences as variant above so they were not included in order
		5'	Variable	Annealing	Total	Length
ds1	R1	ggctttccggtgcggatcca	atgcaccagaaaaccgccttccagatccaccggcgtggtggccagcgggcgccaatcaacacgatagcgggagtcagccagttgatcgctcacttccggtgccagccagtagcgctgcggttcgaacggataattcggcaggtcgaccggcggtgccgccgggaaaacattgcgccaatcgacggcaacaccatgcacatgtgcacgggccagttccgcaatcagatgttcttctgcagtatcacggtgcagactaccgatagccac	CGGTTCTGCTTCCGGTAAGCACG	ggctttccggtgcggatccaatgcaccagaaaaccgccttccagatccaccggcgtggtggccagcgggcgccaatcaacacgatagcgggagtcagccagttgatcgctcacttccggtgccagccagtagcgctgcggttcgaacggataattcggcaggtcgaccggcggtgccgccgggaaaacattgcgccaatcgacggcaacaccatgcacatgtgcacgggccagttccgcaatcagatgttcttctgcagtatcacggtgcagactaccgatagccacCGGTTCTGCTTCCGGTAAGCACG	310	ggctttccggtgcggatccaatgcaccagaaaaccgccttccagatccaccggcgtggtggccagcgggcgccaatcaacacgatagcgggagtcagccagttgatcgctcacttccggtgccagccagtagcgctgcggttcgaacggataattcggcaggtcgaccggcggtgccgccgggaaaacattgcgccaatcgacggcaacaccatgcacatgtgcacgggccagttccgcaatcagatgttcttctgcagtatcacggtgcagactaccgatagccacCGGTTCTGCTTCCGGTAAGCACG
ds2	R2	ggctttccggtgcggatcca	atgcaccagaaaaccgccttccagatccaccggcgtggtggccagcgggcgccaatcaacacgatagcgggagtcagccagttgatcgctcacttccggtgccagccagtagcgctgcggttcgaacggataattcggcaggtcgaccggcggtgccgccgggaaaacattgcgccaatcgacggcaacaccatgcacatgtgcacgggccagttccgcaatcagatgttcttctgcagtatcacggtgcagactaccgatagcGGT	CGGTTCTGCTTCCGGTAAGCACG	ggctttccggtgcggatccaatgcaccagaaaaccgccttccagatccaccggcgtggtggccagcgggcgccaatcaacacgatagcgggagtcagccagttgatcgctcacttccggtgccagccagtagcgctgcggttcgaacggataattcggcaggtcgaccggcggtgccgccgggaaaacattgcgccaatcgacggcaacaccatgcacatgtgcacgggccagttccgcaatcagatgttcttctgcagtatcacggtgcagactaccgatagcGGTCGGTTCTGCTTCCGGTAAGCACG	310	ggctttccggtgcggatccaatgcaccagaaaaccgccttccagatccaccggcgtggtggccagcgggcgccaatcaacacgatagcgggagtcagccagttgatcgctcacttccggtgccagccagtagcgctgcggttcgaacggataattcggcaggtcgaccggcggtgccgccgggaaaacattgcgccaatcgacggcaacaccatgcacatgtgcacgggccagttccgcaatcagatgttcttctgcagtatcacggtgcagactaccgatagcGGTCGGTTCTGCTTCCGGTAAGCACG
ds3	R3	ggctttccggtgcggatcca	atgcaccagaaaaccgccttccagatccaccggcgtggtggccagcgggcgccaatcaacacgatagcgggagtcagccagttgatcgctcacttccggtgccagccagtagcgctgcggttcgaacggataattcggcaggtcgaccggcggtgccgccgggaaaacattgcgccaatcgacggcaacaccatgcacatgtgcacgggccagttccgcaatcagatgttcttctgcagtatcacggtgcagactaccgatCAAGGT	CGGTTCTGCTTCCGGTAAGCACG	ggctttccggtgcggatccaatgcaccagaaaaccgccttccagatccaccggcgtggtggccagcgggcgccaatcaacacgatagcgggagtcagccagttgatcgctcacttccggtgccagccagtagcgctgcggttcgaacggataattcggcaggtcgaccggcggtgccgccgggaaaacattgcgccaatcgacggcaacaccatgcacatgtgcacgggccagttccgcaatcagatgttcttctgcagtatcacggtgcagactaccgatCAAGGTCGGTTCTGCTTCCGGTAAGCACG	310	ggctttccggtgcggatccaatgcaccagaaaaccgccttccagatccaccggcgtggtggccagcgggcgccaatcaacacgatagcgggagtcagccagttgatcgctcacttccggtgccagccagtagcgctgcggttcgaacggataattcggcaggtcgaccggcggtgccgccgggaaaacattgcgccaatcgacggcaacaccatgcacatgtgcacgggccagttccgcaatcagatgttcttctgcagtatcacggtgcagactaccgatCAAGGTCGGTTCTGCTTCCGGTAAGCACG
ds4	R4	ggctttccggtgcggatcca	atgcaccagaaaaccgccttccagatccaccggcgtggtggccagcgggcgccaatcaacacgatagcgggagtcagccagttgatcgctcacttccggtgccagccagtagcgctgcggttcgaacggataattcggcaggtcgaccggcggtgccgccgggaaaacattgcgccaatcgacggcaacaccatgcacatgtgcacgggccagttccgcaatcagatgttcttctgcagtatcacggtgcagactaccTAACAAGGT	CGGTTCTGCTTCCGGTAAGCACG	ggctttccggtgcggatccaatgcaccagaaaaccgccttccagatccaccggcgtggtggccagcgggcgccaatcaacacgatagcgggagtcagccagttgatcgctcacttccggtgccagccagtagcgctgcggttcgaacggataattcggcaggtcgaccggcggtgccgccgggaaaacattgcgccaatcgacggcaacaccatgcacatgtgcacgggccagttccgcaatcagatgttcttctgcagtatcacggtgcagactaccTAACAAGGTCGGTTCTGCTTCCGGTAAGCACG	310	ggctttccggtgcggatccaatgcaccagaaaaccgccttccagatccaccggcgtggtggccagcgggcgccaatcaacacgatagcgggagtcagccagttgatcgctcacttccggtgccagccagtagcgctgcggttcgaacggataattcggcaggtcgaccggcggtgccgccgggaaaacattgcgccaatcgacggcaacaccatgcacatgtgcacgggccagttccgcaatcagatgttcttctgcagtatcacggtgcagactaccTAACAAGGTCGGTTCTGCTTCCGGTAAGCACG
ds5	R5	ggctttccggtgcggatcca	atgcaccagaaaaccgccttccagatccaccggcgtggtggccagcgggcgccaatcaacacgatagcgggagtcagccagttgatcgctcacttccggtgccagccagtagcgctgcggttcgaacggataattcggcaggtcgaccggcggtgccgccgggaaaacattgcgccaatcgacggcaacaccatgcacatgtgcacgggccagttccgcaatcagatgttcttctgcagtatcacggtgcagactTGCTAACAAGGT	CGGTTCTGCTTCCGGTAAGCACG	ggctttccggtgcggatccaatgcaccagaaaaccgccttccagatccaccggcgtggtggccagcgggcgccaatcaacacgatagcgggagtcagccagttgatcgctcacttccggtgccagccagtagcgctgcggttcgaacggataattcggcaggtcgaccggcggtgccgccgggaaaacattgcgccaatcgacggcaacaccatgcacatgtgcacgggccagttccgcaatcagatgttcttctgcagtatcacggtgcagactTGCTAACAAGGTCGGTTCTGCTTCCGGTAAGCACG	310	ggctttccggtgcggatccaatgcaccagaaaaccgccttccagatccaccggcgtggtggccagcgggcgccaatcaacacgatagcgggagtcagccagttgatcgctcacttccggtgccagccagtagcgctgcggttcgaacggataattcggcaggtcgaccggcggtgccgccgggaaaacattgcgccaatcgacggcaacaccatgcacatgtgcacgggccagttccgcaatcagatgttcttctgcagtatcacggtgcagactTGCTAACAAGGTCGGTTCTGCTTCCGGTAAGCACG
ds6	R6	ggctttccggtgcggatcca	atgcaccagaaaaccgccttccagatccaccggcgtggtggccagcgggcgccaatcaacacgatagcgggagtcagccagttgatcgctcacttccggtgccagccagtagcgctgcggttcgaacggataattcggcaggtcgaccggcggtgccgccgggaaaacattgcgccaatcgacggcaacaccatgcacatgtgcacgggccagttccgcaatcagatgttcttctgcagtatcacggtgcagCGATGCTAACAAGGT	CGGTTCTGCTTCCGGTAAGCACG	ggctttccggtgcggatccaatgcaccagaaaaccgccttccagatccaccggcgtggtggccagcgggcgccaatcaacacgatagcgggagtcagccagttgatcgctcacttccggtgccagccagtagcgctgcggttcgaacggataattcggcaggtcgaccggcggtgccgccgggaaaacattgcgccaatcgacggcaacaccatgcacatgtgcacgggccagttccgcaatcagatgttcttctgcagtatcacggtgcagCGATGCTAACAAGGTCGGTTCTGCTTCCGGTAAGCACG	310	ggctttccggtgcggatccaatgcaccagaaaaccgccttccagatccaccggcgtggtggccagcgggcgccaatcaacacgatagcgggagtcagccagttgatcgctcacttccggtgccagccagtagcgctgcggttcgaacggataattcggcaggtcgaccggcggtgccgccgggaaaacattgcgccaatcgacggcaacaccatgcacatgtgcacgggccagttccgcaatcagatgttcttctgcagtatcacggtgcagCGATGCTAACAAGGTCGGTTCTGCTTCCGGTAAGCACG
ds7	R7	ggctttccggtgcggatcca	atgcaccagaaaaccgccttccagatccaccggcgtggtggccagcgggcgccaatcaacacgatagcgggagtcagccagttgatcgctcacttccggtgccagccagtagcgctgcggttcgaacggataattcggcaggtcgaccggcggtgccgccgggaaaacattgcgccaatcgacggcaacaccatgcacatgtgcacgggccagttccgcaatcagatgttcttctgcagtatcacggtgCAGCGATGCTAACAAGGT	CGGTTCTGCTTCCGGTAAGCACG	ggctttccggtgcggatccaatgcaccagaaaaccgccttccagatccaccggcgtggtggccagcgggcgccaatcaacacgatagcgggagtcagccagttgatcgctcacttccggtgccagccagtagcgctgcggttcgaacggataattcggcaggtcgaccggcggtgccgccgggaaaacattgcgccaatcgacggcaacaccatgcacatgtgcacgggccagttccgcaatcagatgttcttctgcagtatcacggtgCAGCGATGCTAACAAGGTCGGTTCTGCTTCCGGTAAGCACG	310	ggctttccggtgcggatccaatgcaccagaaaaccgccttccagatccaccggcgtggtggccagcgggcgccaatcaacacgatagcgggagtcagccagttgatcgctcacttccggtgccagccagtagcgctgcggttcgaacggataattcggcaggtcgaccggcggtgccgccgggaaaacattgcgccaatcgacggcaacaccatgcacatgtgcacgggccagttccgcaatcagatgttcttctgcagtatcacggtgCAGCGATGCTAACAAGGTCGGTTCTGCTTCCGGTAAGCACG
ds8	R8	ggctttccggtgcggatcca	atgcaccagaaaaccgccttccagatccaccggcgtggtggccagcgggcgccaatcaacacgatagcgggagtcagccagttgatcgctcacttccggtgccagccagtagcgctgcggttcgaacggataattcggcaggtcgaccggcggtgccgccgggaaaacattgcgccaatcgacggcaacaccatgcacatgtgcacgggccagttccgcaatcagatgttcttctgcagtatcacgGCGCAGCGATGCTAACAAGGT	CGGTTCTGCTTCCGGTAAGCACG	ggctttccggtgcggatccaatgcaccagaaaaccgccttccagatccaccggcgtggtggccagcgggcgccaatcaacacgatagcgggagtcagccagttgatcgctcacttccggtgccagccagtagcgctgcggttcgaacggataattcggcaggtcgaccggcggtgccgccgggaaaacattgcgccaatcgacggcaacaccatgcacatgtgcacgggccagttccgcaatcagatgttcttctgcagtatcacgGCGCAGCGATGCTAACAAGGTCGGTTCTGCTTCCGGTAAGCACG	310	ggctttccggtgcggatccaatgcaccagaaaaccgccttccagatccaccggcgtggtggccagcgggcgccaatcaacacgatagcgggagtcagccagttgatcgctcacttccggtgccagccagtagcgctgcggttcgaacggataattcggcaggtcgaccggcggtgccgccgggaaaacattgcgccaatcgacggcaacaccatgcacatgtgcacgggccagttccgcaatcagatgttcttctgcagtatcacgGCGCAGCGATGCTAACAAGGTCGGTTCTGCTTCCGGTAAGCACG
ds9	R9	ggctttccggtgcggatcca	atgcaccagaaaaccgccttccagatccaccggcgtggtggccagcgggcgccaatcaacacgatagcgggagtcagccagttgatcgctcacttccggtgccagccagtagcgctgcggttcgaacggataattcggcaggtcgaccggcggtgccgccgggaaaacattgcgccaatcgacggcaacaccatgcacatgtgcacgggccagttccgcaatcagatgttcttctgcagtatcGGCGCGCAGCGATGCTAACAAGGT	CGGTTCTGCTTCCGGTAAGCACG	ggctttccggtgcggatccaatgcaccagaaaaccgccttccagatccaccggcgtggtggccagcgggcgccaatcaacacgatagcgggagtcagccagttgatcgctcacttccggtgccagccagtagcgctgcggttcgaacggataattcggcaggtcgaccggcggtgccgccgggaaaacattgcgccaatcgacggcaacaccatgcacatgtgcacgggccagttccgcaatcagatgttcttctgcagtatcGGCGCGCAGCGATGCTAACAAGGTCGGTTCTGCTTCCGGTAAGCACG	310	ggctttccggtgcggatccaatgcaccagaaaaccgccttccagatccaccggcgtggtggccagcgggcgccaatcaacacgatagcgggagtcagccagttgatcgctcacttccggtgccagccagtagcgctgcggttcgaacggataattcggcaggtcgaccggcggtgccgccgggaaaacattgcgccaatcgacggcaacaccatgcacatgtgcacgggccagttccgcaatcagatgttcttctgcagtatcGGCGCGCAGCGATGCTAACAAGGTCGGTTCTGCTTCCGGTAAGCACG
ds10a	R10	ggctttccggtgcggatcca	atgcaccagaaaaccgccttccagatccaccggcgtggtggccagcgggcgccaatcaacacgatagcgggagtcagccagttgatcgctcacttccggtgccagccagtagcgctgcggttcgaacggataattcggcaggtcgaccggcggtgccgccgggaaaacattgcgccaatcgacggcaacaccatgcacatgtgcacgggccagttccgcaatcagatgttcttctgcagtTCCGGCGCGCAGCGATGCTAACAAGGT	CGGTTCTGCTTCCGGTAAGCACG	ggctttccggtgcggatccaatgcaccagaaaaccgccttccagatccaccggcgtggtggccagcgggcgccaatcaacacgatagcgggagtcagccagttgatcgctcacttccggtgccagccagtagcgctgcggttcgaacggataattcggcaggtcgaccggcggtgccgccgggaaaacattgcgccaatcgacggcaacaccatgcacatgtgcacgggccagttccgcaatcagatgttcttctgcagtTCCGGCGCGCAGCGATGCTAACAAGGTCGGTTCTGCTTCCGGTAAGCACG	310	ggctttccggtgcggatccaatgcaccagaaaaccgccttccagatccaccggcgtggtggccagcgggcgccaatcaacacgatagcgggagtcagccagttgatcgctcacttccggtgccagccagtagcgctgcggttcgaacggataattcggcaggtcgaccggcggtgccgccgggaaaacattgcgccaatcgacggcaacaccatgcacatgtgcacgggccagttccgcaatcagatgttcttctgcagtTCCGGCGCGCAGCGATGCTAACAAGGTCGGTTCTGCTTCCGGTAAGCACG
ds10b	R11	ggctttccggtgcggatcca	atgcaccagaaaaccgccttccagatccaccggcgtggtggccagcgggcgccaatcaacacgatagcgggagtcagccagttgatcgctcacttccggtgccagccagtagcgctgcggttcgaacggataattcggcaggtcgaccggcggtgccgccgggaaaacattgcgccaatcgacggcaacaccatgcacatgtgcacgggccagttccgcaatcagatgttcttctgcagtACGTCCGGCGCGCAGCGATGCTAACAAGGT	CGGTTCTGCTTCCGGTAAGCACG	ggctttccggtgcggatccaatgcaccagaaaaccgccttccagatccaccggcgtggtggccagcgggcgccaatcaacacgatagcgggagtcagccagttgatcgctcacttccggtgccagccagtagcgctgcggttcgaacggataattcggcaggtcgaccggcggtgccgccgggaaaacattgcgccaatcgacggcaacaccatgcacatgtgcacgggccagttccgcaatcagatgttcttctgcagtACGTCCGGCGCGCAGCGATGCTAACAAGGTCGGTTCTGCTTCCGGTAAGCACG	313	ggctttccggtgcggatccaatgcaccagaaaaccgccttccagatccaccggcgtggtggccagcgggcgccaatcaacacgatagcgggagtcagccagttgatcgctcacttccggtgccagccagtagcgctgcggttcgaacggataattcggcaggtcgaccggcggtgccgccgggaaaacattgcgccaatcgacggcaacaccatgcacatgtgcacgggccagttccgcaatcagatgttcttctgcagtACGTCCGGCGCGCAGCGATGCTAACAAGGTCGGTTCTGCTTCCGGTAAGCACG
ds11	R12	ggctttccggtgcggatcca	atgcaccagaaaaccgccttccagatccaccggcgtggtggccagcgggcgccaatcaacacgatagcgggagtcagccagttgatcgctcacttccggtgccagccagtagcgctgcggttcgaacggataattcggcaggtcgaccggcggtgccgccgggaaaacattgcgccaatcgacggcaacaccatgcacatgtgcacgggccagttccgcaatcagatgttcttctgcTTCACGTCCGGCGCGCAGCGATGCTAACAAGGT	CGGTTCTGCTTCCGGTAAGCACG	ggctttccggtgcggatccaatgcaccagaaaaccgccttccagatccaccggcgtggtggccagcgggcgccaatcaacacgatagcgggagtcagccagttgatcgctcacttccggtgccagccagtagcgctgcggttcgaacggataattcggcaggtcgaccggcggtgccgccgggaaaacattgcgccaatcgacggcaacaccatgcacatgtgcacgggccagttccgcaatcagatgttcttctgcTTCACGTCCGGCGCGCAGCGATGCTAACAAGGTCGGTTCTGCTTCCGGTAAGCACG	313	ggctttccggtgcggatccaatgcaccagaaaaccgccttccagatccaccggcgtggtggccagcgggcgccaatcaacacgatagcgggagtcagccagttgatcgctcacttccggtgccagccagtagcgctgcggttcgaacggataattcggcaggtcgaccggcggtgccgccgggaaaacattgcgccaatcgacggcaacaccatgcacatgtgcacgggccagttccgcaatcagatgttcttctgcTTCACGTCCGGCGCGCAGCGATGCTAACAAGGTCGGTTCTGCTTCCGGTAAGCACG
ds12	R13	ggctttccggtgcggatcca	atgcaccagaaaaccgccttccagatccaccggcgtggtggccagcgggcgccaatcaacacgatagcgggagtcagccagttgatcgctcacttccggtgccagccagtagcgctgcggttcgaacggataattcggcaggtcgaccggcggtgccgccgggaaaacattgcgccaatcgacggcaacaccatgcacatgtgcacgggccagttccgcaatcagatgttcttcTTCTTCACGTCCGGCGCGCAGCGATGCTAACAAGGT	CGGTTCTGCTTCCGGTAAGCACG	ggctttccggtgcggatccaatgcaccagaaaaccgccttccagatccaccggcgtggtggccagcgggcgccaatcaacacgatagcgggagtcagccagttgatcgctcacttccggtgccagccagtagcgctgcggttcgaacggataattcggcaggtcgaccggcggtgccgccgggaaaacattgcgccaatcgacggcaacaccatgcacatgtgcacgggccagttccgcaatcagatgttcttcTTCTTCACGTCCGGCGCGCAGCGATGCTAACAAGGTCGGTTCTGCTTCCGGTAAGCACG	313	ggctttccggtgcggatccaatgcaccagaaaaccgccttccagatccaccggcgtggtggccagcgggcgccaatcaacacgatagcgggagtcagccagttgatcgctcacttccggtgccagccagtagcgctgcggttcgaacggataattcggcaggtcgaccggcggtgccgccgggaaaacattgcgccaatcgacggcaacaccatgcacatgtgcacgggccagttccgcaatcagatgttcttcTTCTTCACGTCCGGCGCGCAGCGATGCTAACAAGGTCGGTTCTGCTTCCGGTAAGCACG
ds13	R14	ggctttccggtgcggatcca	atgcaccagaaaaccgccttccagatccaccggcgtggtggccagcgggcgccaatcaacacgatagcgggagtcagccagttgatcgctcacttccggtgccagccagtagcgctgcggttcgaacggataattcggcaggtcgaccggcggtgccgccgggaaaacattgcgccaatcgacggcaacaccatgcacatgtgcacgggccagttccgcaatcagatgttcTGCTTCTTCACGTCCGGCGCGCAGCGATGCTAACAAGGT	CGGTTCTGCTTCCGGTAAGCACG	ggctttccggtgcggatccaatgcaccagaaaaccgccttccagatccaccggcgtggtggccagcgggcgccaatcaacacgatagcgggagtcagccagttgatcgctcacttccggtgccagccagtagcgctgcggttcgaacggataattcggcaggtcgaccggcggtgccgccgggaaaacattgcgccaatcgacggcaacaccatgcacatgtgcacgggccagttccgcaatcagatgttcTGCTTCTTCACGTCCGGCGCGCAGCGATGCTAACAAGGTCGGTTCTGCTTCCGGTAAGCACG	313	ggctttccggtgcggatccaatgcaccagaaaaccgccttccagatccaccggcgtggtggccagcgggcgccaatcaacacgatagcgggagtcagccagttgatcgctcacttccggtgccagccagtagcgctgcggttcgaacggataattcggcaggtcgaccggcggtgccgccgggaaaacattgcgccaatcgacggcaacaccatgcacatgtgcacgggccagttccgcaatcagatgttcTGCTTCTTCACGTCCGGCGCGCAGCGATGCTAACAAGGTCGGTTCTGCTTCCGGTAAGCACG
ds14	R15	ggctttccggtgcggatcca	atgcaccagaaaaccgccttccagatccaccggcgtggtggccagcgggcgccaatcaacacgatagcgggagtcagccagttgatcgctcacttccggtgccagccagtagcgctgcggttcgaacggataattcggcaggtcgaccggcggtgccgccgggaaaacattgcgccaatcgacggcaacaccatgcacatgtgcacgggccagttccgcaatcagatgTGCTGCTTCTTCACGTCCGGCGCGCAGCGATGCTAACAAGGT	CGGTTCTGCTTCCGGTAAGCACG	ggctttccggtgcggatccaatgcaccagaaaaccgccttccagatccaccggcgtggtggccagcgggcgccaatcaacacgatagcgggagtcagccagttgatcgctcacttccggtgccagccagtagcgctgcggttcgaacggataattcggcaggtcgaccggcggtgccgccgggaaaacattgcgccaatcgacggcaacaccatgcacatgtgcacgggccagttccgcaatcagatgTGCTGCTTCTTCACGTCCGGCGCGCAGCGATGCTAACAAGGTCGGTTCTGCTTCCGGTAAGCACG	313	ggctttccggtgcggatccaatgcaccagaaaaccgccttccagatccaccggcgtggtggccagcgggcgccaatcaacacgatagcgggagtcagccagttgatcgctcacttccggtgccagccagtagcgctgcggttcgaacggataattcggcaggtcgaccggcggtgccgccgggaaaacattgcgccaatcgacggcaacaccatgcacatgtgcacgggccagttccgcaatcagatgTGCTGCTTCTTCACGTCCGGCGCGCAGCGATGCTAACAAGGTCGGTTCTGCTTCCGGTAAGCACG
ds15	R16	ggctttccggtgcggatcca	atgcaccagaaaaccgccttccagatccaccggcgtggtggccagcgggcgccaatcaacacgatagcgggagtcagccagttgatcgctcacttccggtgccagccagtagcgctgcggttcgaacggataattcggcaggtcgaccggcggtgccgccgggaaaacattgcgccaatcgacggcaacaccatgcacatgtgcacgggccagttccgcaatcagTCCTGCTGCTTCTTCACGTCCGGCGCGCAGCGATGCTAACAAGGT	CGGTTCTGCTTCCGGTAAGCACG	ggctttccggtgcggatccaatgcaccagaaaaccgccttccagatccaccggcgtggtggccagcgggcgccaatcaacacgatagcgggagtcagccagttgatcgctcacttccggtgccagccagtagcgctgcggttcgaacggataattcggcaggtcgaccggcggtgccgccgggaaaacattgcgccaatcgacggcaacaccatgcacatgtgcacgggccagttccgcaatcagTCCTGCTGCTTCTTCACGTCCGGCGCGCAGCGATGCTAACAAGGTCGGTTCTGCTTCCGGTAAGCACG	313	ggctttccggtgcggatccaatgcaccagaaaaccgccttccagatccaccggcgtggtggccagcgggcgccaatcaacacgatagcgggagtcagccagttgatcgctcacttccggtgccagccagtagcgctgcggttcgaacggataattcggcaggtcgaccggcggtgccgccgggaaaacattgcgccaatcgacggcaacaccatgcacatgtgcacgggccagttccgcaatcagTCCTGCTGCTTCTTCACGTCCGGCGCGCAGCGATGCTAACAAGGTCGGTTCTGCTTCCGGTAAGCACG
ds16	R17	ggctttccggtgcggatcca	atgcaccagaaaaccgccttccagatccaccggcgtggtggccagcgggcgccaatcaacacgatagcgggagtcagccagttgatcgctcacttccggtgccagccagtagcgctgcggttcgaacggataattcggcaggtcgaccggcggtgccgccgggaaaacattgcgccaatcgacggcaacaccatgcacatgtgcacgggccagttccgcaatCACTCCTGCTGCTTCTTCACGTCCGGCGCGCAGCGATGCTAACAAGGT	CGGTTCTGCTTCCGGTAAGCACG	ggctttccggtgcggatccaatgcaccagaaaaccgccttccagatccaccggcgtggtggccagcgggcgccaatcaacacgatagcgggagtcagccagttgatcgctcacttccggtgccagccagtagcgctgcggttcgaacggataattcggcaggtcgaccggcggtgccgccgggaaaacattgcgccaatcgacggcaacaccatgcacatgtgcacgggccagttccgcaatCACTCCTGCTGCTTCTTCACGTCCGGCGCGCAGCGATGCTAACAAGGTCGGTTCTGCTTCCGGTAAGCACG	313	ggctttccggtgcggatccaatgcaccagaaaaccgccttccagatccaccggcgtggtggccagcgggcgccaatcaacacgatagcgggagtcagccagttgatcgctcacttccggtgccagccagtagcgctgcggttcgaacggataattcggcaggtcgaccggcggtgccgccgggaaaacattgcgccaatcgacggcaacaccatgcacatgtgcacgggccagttccgcaatCACTCCTGCTGCTTCTTCACGTCCGGCGCGCAGCGATGCTAACAAGGTCGGTTCTGCTTCCGGTAAGCACG
ds17	R18	ggctttccggtgcggatcca	atgcaccagaaaaccgccttccagatccaccggcgtggtggccagcgggcgccaatcaacacgatagcgggagtcagccagttgatcgctcacttccggtgccagccagtagcgctgcggttcgaacggataattcggcaggtcgaccggcggtgccgccgggaaaacattgcgccaatcgacggcaacaccatgcacatgtgcacgggccagttccgcCAACACTCCTGCTGCTTCTTCACGTCCGGCGCGCAGCGATGCTAACAAGGT	CGGTTCTGCTTCCGGTAAGCACG	ggctttccggtgcggatccaatgcaccagaaaaccgccttccagatccaccggcgtggtggccagcgggcgccaatcaacacgatagcgggagtcagccagttgatcgctcacttccggtgccagccagtagcgctgcggttcgaacggataattcggcaggtcgaccggcggtgccgccgggaaaacattgcgccaatcgacggcaacaccatgcacatgtgcacgggccagttccgcCAACACTCCTGCTGCTTCTTCACGTCCGGCGCGCAGCGATGCTAACAAGGTCGGTTCTGCTTCCGGTAAGCACG	313	ggctttccggtgcggatccaatgcaccagaaaaccgccttccagatccaccggcgtggtggccagcgggcgccaatcaacacgatagcgggagtcagccagttgatcgctcacttccggtgccagccagtagcgctgcggttcgaacggataattcggcaggtcgaccggcggtgccgccgggaaaacattgcgccaatcgacggcaacaccatgcacatgtgcacgggccagttccgcCAACACTCCTGCTGCTTCTTCACGTCCGGCGCGCAGCGATGCTAACAAGGTCGGTTCTGCTTCCGGTAAGCACG
ds18	R19	ggctttccggtgcggatcca	atgcaccagaaaaccgccttccagatccaccggcgtggtggccagcgggcgccaatcaacacgatagcgggagtcagccagttgatcgctcacttccggtgccagccagtagcgctgcggttcgaacggataattcggcaggtcgaccggcggtgccgccgggaaaacattgcgccaatcgacggcaacaccatgcacatgtgcacgggccagttcTTCCAACACTCCTGCTGCTTCTTCACGTCCGGCGCGCAGCGATGCTAACAAGGT	CGGTTCTGCTTCCGGTAAGCACG	ggctttccggtgcggatccaatgcaccagaaaaccgccttccagatccaccggcgtggtggccagcgggcgccaatcaacacgatagcgggagtcagccagttgatcgctcacttccggtgccagccagtagcgctgcggttcgaacggataattcggcaggtcgaccggcggtgccgccgggaaaacattgcgccaatcgacggcaacaccatgcacatgtgcacgggccagttcTTCCAACACTCCTGCTGCTTCTTCACGTCCGGCGCGCAGCGATGCTAACAAGGTCGGTTCTGCTTCCGGTAAGCACG	313	ggctttccggtgcggatccaatgcaccagaaaaccgccttccagatccaccggcgtggtggccagcgggcgccaatcaacacgatagcgggagtcagccagttgatcgctcacttccggtgccagccagtagcgctgcggttcgaacggataattcggcaggtcgaccggcggtgccgccgggaaaacattgcgccaatcgacggcaacaccatgcacatgtgcacgggccagttcTTCCAACACTCCTGCTGCTTCTTCACGTCCGGCGCGCAGCGATGCTAACAAGGTCGGTTCTGCTTCCGGTAAGCACG
ds19	R20	ggctttccggtgcggatcca	atgcaccagaaaaccgccttccagatccaccggcgtggtggccagcgggcgccaatcaacacgatagcgggagtcagccagttgatcgctcacttccggtgccagccagtagcgctgcggttcgaacggataattcggcaggtcgaccggcggtgccgccgggaaaacattgcgccaatcgacggcaacaccatgcacatgtgcacgggccagCGCTTCCAACACTCCTGCTGCTTCTTCACGTCCGGCGCGCAGCGATGCTAACAAGGT	CGGTTCTGCTTCCGGTAAGCACG	ggctttccggtgcggatccaatgcaccagaaaaccgccttccagatccaccggcgtggtggccagcgggcgccaatcaacacgatagcgggagtcagccagttgatcgctcacttccggtgccagccagtagcgctgcggttcgaacggataattcggcaggtcgaccggcggtgccgccgggaaaacattgcgccaatcgacggcaacaccatgcacatgtgcacgggccagCGCTTCCAACACTCCTGCTGCTTCTTCACGTCCGGCGCGCAGCGATGCTAACAAGGTCGGTTCTGCTTCCGGTAAGCACG	313	ggctttccggtgcggatccaatgcaccagaaaaccgccttccagatccaccggcgtggtggccagcgggcgccaatcaacacgatagcgggagtcagccagttgatcgctcacttccggtgccagccagtagcgctgcggttcgaacggataattcggcaggtcgaccggcggtgccgccgggaaaacattgcgccaatcgacggcaacaccatgcacatgtgcacgggccagCGCTTCCAACACTCCTGCTGCTTCTTCACGTCCGGCGCGCAGCGATGCTAACAAGGTCGGTTCTGCTTCCGGTAAGCACG
ds20	R21	ggctttccggtgcggatcca	atgcaccagaaaaccgccttccagatccaccggcgtggtggccagcgggcgccaatcaacacgatagcgggagtcagccagttgatcgctcacttccggtgccagccagtagcgctgcggttcgaacggataattcggcaggtcgaccggcggtgccgccgggaaaacattgcgccaatcgacggcaacaccatgcacatgtgcacgggcAAGCGCTTCCAACACTCCTGCTGCTTCTTCACGTCCGGCGCGCAGCGATGCTAACAAGGT	CGGTTCTGCTTCCGGTAAGCACG	ggctttccggtgcggatccaatgcaccagaaaaccgccttccagatccaccggcgtggtggccagcgggcgccaatcaacacgatagcgggagtcagccagttgatcgctcacttccggtgccagccagtagcgctgcggttcgaacggataattcggcaggtcgaccggcggtgccgccgggaaaacattgcgccaatcgacggcaacaccatgcacatgtgcacgggcAAGCGCTTCCAACACTCCTGCTGCTTCTTCACGTCCGGCGCGCAGCGATGCTAACAAGGTCGGTTCTGCTTCCGGTAAGCACG	313	ggctttccggtgcggatccaatgcaccagaaaaccgccttccagatccaccggcgtggtggccagcgggcgccaatcaacacgatagcgggagtcagccagttgatcgctcacttccggtgccagccagtagcgctgcggttcgaacggataattcggcaggtcgaccggcggtgccgccgggaaaacattgcgccaatcgacggcaacaccatgcacatgtgcacgggcAAGCGCTTCCAACACTCCTGCTGCTTCTTCACGTCCGGCGCGCAGCGATGCTAACAAGGTCGGTTCTGCTTCCGGTAAGCACG
ds21	R22	ggctttccggtgcggatcca	atgcaccagaaaaccgccttccagatccaccggcgtggtggccagcgggcgccaatcaacacgatagcgggagtcagccagttgatcgctcacttccggtgccagccagtagcgctgcggttcgaacggataattcggcaggtcgaccggcggtgccgccgggaaaacattgcgccaatcgacggcaacaccatgcacatgtgcacgGCCAAGCGCTTCCAACACTCCTGCTGCTTCTTCACGTCCGGCGCGCAGCGATGCTAACAAGGT	CGGTTCTGCTTCCGGTAAGCACG	ggctttccggtgcggatccaatgcaccagaaaaccgccttccagatccaccggcgtggtggccagcgggcgccaatcaacacgatagcgggagtcagccagttgatcgctcacttccggtgccagccagtagcgctgcggttcgaacggataattcggcaggtcgaccggcggtgccgccgggaaaacattgcgccaatcgacggcaacaccatgcacatgtgcacgGCCAAGCGCTTCCAACACTCCTGCTGCTTCTTCACGTCCGGCGCGCAGCGATGCTAACAAGGTCGGTTCTGCTTCCGGTAAGCACG	313	ggctttccggtgcggatccaatgcaccagaaaaccgccttccagatccaccggcgtggtggccagcgggcgccaatcaacacgatagcgggagtcagccagttgatcgctcacttccggtgccagccagtagcgctgcggttcgaacggataattcggcaggtcgaccggcggtgccgccgggaaaacattgcgccaatcgacggcaacaccatgcacatgtgcacgGCCAAGCGCTTCCAACACTCCTGCTGCTTCTTCACGTCCGGCGCGCAGCGATGCTAACAAGGTCGGTTCTGCTTCCGGTAAGCACG
ds22	R23	ggctttccggtgcggatcca	atgcaccagaaaaccgccttccagatccaccggcgtggtggccagcgggcgccaatcaacacgatagcgggagtcagccagttgatcgctcacttccggtgccagccagtagcgctgcggttcgaacggataattcggcaggtcgaccggcggtgccgccgggaaaacattgcgccaatcgacggcaacaccatgcacatgtgcGCGGCCAAGCGCTTCCAACACTCCTGCTGCTTCTTCACGTCCGGCGCGCAGCGATGCTAACAAGGT	CGGTTCTGCTTCCGGTAAGCACG	ggctttccggtgcggatccaatgcaccagaaaaccgccttccagatccaccggcgtggtggccagcgggcgccaatcaacacgatagcgggagtcagccagttgatcgctcacttccggtgccagccagtagcgctgcggttcgaacggataattcggcaggtcgaccggcggtgccgccgggaaaacattgcgccaatcgacggcaacaccatgcacatgtgcGCGGCCAAGCGCTTCCAACACTCCTGCTGCTTCTTCACGTCCGGCGCGCAGCGATGCTAACAAGGTCGGTTCTGCTTCCGGTAAGCACG	313	ggctttccggtgcggatccaatgcaccagaaaaccgccttccagatccaccggcgtggtggccagcgggcgccaatcaacacgatagcgggagtcagccagttgatcgctcacttccggtgccagccagtagcgctgcggttcgaacggataattcggcaggtcgaccggcggtgccgccgggaaaacattgcgccaatcgacggcaacaccatgcacatgtgcGCGGCCAAGCGCTTCCAACACTCCTGCTGCTTCTTCACGTCCGGCGCGCAGCGATGCTAACAAGGTCGGTTCTGCTTCCGGTAAGCACG
ds23	R24	ggctttccggtgcggatcca	atgcaccagaaaaccgccttccagatccaccggcgtggtggccagcgggcgccaatcaacacgatagcgggagtcagccagttgatcgctcacttccggtgccagccagtagcgctgcggttcgaacggataattcggcaggtcgaccggcggtgccgccgggaaaacattgcgccaatcgacggcaacaccatgcacatgCAAGCGGCCAAGCGCTTCCAACACTCCTGCTGCTTCTTCACGTCCGGCGCGCAGCGATGCTAACAAGGT	CGGTTCTGCTTCCGGTAAGCACG	ggctttccggtgcggatccaatgcaccagaaaaccgccttccagatccaccggcgtggtggccagcgggcgccaatcaacacgatagcgggagtcagccagttgatcgctcacttccggtgccagccagtagcgctgcggttcgaacggataattcggcaggtcgaccggcggtgccgccgggaaaacattgcgccaatcgacggcaacaccatgcacatgCAAGCGGCCAAGCGCTTCCAACACTCCTGCTGCTTCTTCACGTCCGGCGCGCAGCGATGCTAACAAGGTCGGTTCTGCTTCCGGTAAGCACG	313	ggctttccggtgcggatccaatgcaccagaaaaccgccttccagatccaccggcgtggtggccagcgggcgccaatcaacacgatagcgggagtcagccagttgatcgctcacttccggtgccagccagtagcgctgcggttcgaacggataattcggcaggtcgaccggcggtgccgccgggaaaacattgcgccaatcgacggcaacaccatgcacatgCAAGCGGCCAAGCGCTTCCAACACTCCTGCTGCTTCTTCACGTCCGGCGCGCAGCGATGCTAACAAGGTCGGTTCTGCTTCCGGTAAGCACG
ds24	R25	ggctttccggtgcggatcca	atgcaccagaaaaccgccttccagatccaccggcgtggtggccagcgggcgccaatcaacacgatagcgggagtcagccagttgatcgctcacttccggtgccagccagtagcgctgcggttcgaacggataattcggcaggtcgaccggcggtgccgccgggaaaacattgcgccaatcgacggcaacaccatgcacCCACAAGCGGCCAAGCGCTTCCAACACTCCTGCTGCTTCTTCACGTCCGGCGCGCAGCGATGCTAACAAGGT	CGGTTCTGCTTCCGGTAAGCACG	ggctttccggtgcggatccaatgcaccagaaaaccgccttccagatccaccggcgtggtggccagcgggcgccaatcaacacgatagcgggagtcagccagttgatcgctcacttccggtgccagccagtagcgctgcggttcgaacggataattcggcaggtcgaccggcggtgccgccgggaaaacattgcgccaatcgacggcaacaccatgcacCCACAAGCGGCCAAGCGCTTCCAACACTCCTGCTGCTTCTTCACGTCCGGCGCGCAGCGATGCTAACAAGGTCGGTTCTGCTTCCGGTAAGCACG	313	ggctttccggtgcggatccaatgcaccagaaaaccgccttccagatccaccggcgtggtggccagcgggcgccaatcaacacgatagcgggagtcagccagttgatcgctcacttccggtgccagccagtagcgctgcggttcgaacggataattcggcaggtcgaccggcggtgccgccgggaaaacattgcgccaatcgacggcaacaccatgcacCCACAAGCGGCCAAGCGCTTCCAACACTCCTGCTGCTTCTTCACGTCCGGCGCGCAGCGATGCTAACAAGGTCGGTTCTGCTTCCGGTAAGCACG
ds25	R26	ggctttccggtgcggatcca	atgcaccagaaaaccgccttccagatccaccggcgtggtggccagcgggcgccaatcaacacgatagcgggagtcagccagttgatcgctcacttccggtgccagccagtagcgctgcggttcgaacggataattcggcaggtcgaccggcggtgccgccgggaaaacattgcgccaatcgacggcaacaccatgTGCCCACAAGCGGCCAAGCGCTTCCAACACTCCTGCTGCTTCTTCACGTCCGGCGCGCAGCGATGCTAACAAGGT	CGGTTCTGCTTCCGGTAAGCACG	ggctttccggtgcggatccaatgcaccagaaaaccgccttccagatccaccggcgtggtggccagcgggcgccaatcaacacgatagcgggagtcagccagttgatcgctcacttccggtgccagccagtagcgctgcggttcgaacggataattcggcaggtcgaccggcggtgccgccgggaaaacattgcgccaatcgacggcaacaccatgTGCCCACAAGCGGCCAAGCGCTTCCAACACTCCTGCTGCTTCTTCACGTCCGGCGCGCAGCGATGCTAACAAGGTCGGTTCTGCTTCCGGTAAGCACG	313	ggctttccggtgcggatccaatgcaccagaaaaccgccttccagatccaccggcgtggtggccagcgggcgccaatcaacacgatagcgggagtcagccagttgatcgctcacttccggtgccagccagtagcgctgcggttcgaacggataattcggcaggtcgaccggcggtgccgccgggaaaacattgcgccaatcgacggcaacaccatgTGCCCACAAGCGGCCAAGCGCTTCCAACACTCCTGCTGCTTCTTCACGTCCGGCGCGCAGCGATGCTAACAAGGTCGGTTCTGCTTCCGGTAAGCACG
ds26	R27	ggctttccggtgcggatcca	atgcaccagaaaaccgccttccagatccaccggcgtggtggccagcgggcgccaatcaacacgatagcgggagtcagccagttgatcgctcacttccggtgccagccagtagcgctgcggttcgaacggataattcggcaggtcgaccggcggtgccgccgggaaaacattgcgccaatcgacggcaacaccTGCTGCCCACAAGCGGCCAAGCGCTTCCAACACTCCTGCTGCTTCTTCACGTCCGGCGCGCAGCGATGCTAACAAGGT	CGGTTCTGCTTCCGGTAAGCACG	ggctttccggtgcggatccaatgcaccagaaaaccgccttccagatccaccggcgtggtggccagcgggcgccaatcaacacgatagcgggagtcagccagttgatcgctcacttccggtgccagccagtagcgctgcggttcgaacggataattcggcaggtcgaccggcggtgccgccgggaaaacattgcgccaatcgacggcaacaccTGCTGCCCACAAGCGGCCAAGCGCTTCCAACACTCCTGCTGCTTCTTCACGTCCGGCGCGCAGCGATGCTAACAAGGTCGGTTCTGCTTCCGGTAAGCACG	313	ggctttccggtgcggatccaatgcaccagaaaaccgccttccagatccaccggcgtggtggccagcgggcgccaatcaacacgatagcgggagtcagccagttgatcgctcacttccggtgccagccagtagcgctgcggttcgaacggataattcggcaggtcgaccggcggtgccgccgggaaaacattgcgccaatcgacggcaacaccTGCTGCCCACAAGCGGCCAAGCGCTTCCAACACTCCTGCTGCTTCTTCACGTCCGGCGCGCAGCGATGCTAACAAGGTCGGTTCTGCTTCCGGTAAGCACG
ds27	R28	ggctttccggtgcggatcca	atgcaccagaaaaccgccttccagatccaccggcgtggtggccagcgggcgccaatcaacacgatagcgggagtcagccagttgatcgctcacttccggtgccagccagtagcgctgcggttcgaacggataattcggcaggtcgaccggcggtgccgccgggaaaacattgcgccaatcgacggcaacCCCTGCTGCCCACAAGCGGCCAAGCGCTTCCAACACTCCTGCTGCTTCTTCACGTCCGGCGCGCAGCGATGCTAACAAGGT	CGGTTCTGCTTCCGGTAAGCACG	ggctttccggtgcggatccaatgcaccagaaaaccgccttccagatccaccggcgtggtggccagcgggcgccaatcaacacgatagcgggagtcagccagttgatcgctcacttccggtgccagccagtagcgctgcggttcgaacggataattcggcaggtcgaccggcggtgccgccgggaaaacattgcgccaatcgacggcaacCCCTGCTGCCCACAAGCGGCCAAGCGCTTCCAACACTCCTGCTGCTTCTTCACGTCCGGCGCGCAGCGATGCTAACAAGGTCGGTTCTGCTTCCGGTAAGCACG	313	ggctttccggtgcggatccaatgcaccagaaaaccgccttccagatccaccggcgtggtggccagcgggcgccaatcaacacgatagcgggagtcagccagttgatcgctcacttccggtgccagccagtagcgctgcggttcgaacggataattcggcaggtcgaccggcggtgccgccgggaaaacattgcgccaatcgacggcaacCCCTGCTGCCCACAAGCGGCCAAGCGCTTCCAACACTCCTGCTGCTTCTTCACGTCCGGCGCGCAGCGATGCTAACAAGGTCGGTTCTGCTTCCGGTAAGCACG
ds28	R29	ggctttccggtgcggatcca	atgcaccagaaaaccgccttccagatccaccggcgtggtggccagcgggcgccaatcaacacgatagcgggagtcagccagttgatcgctcacttccggtgccagccagtagcgctgcggttcgaacggataattcggcaggtcgaccggcggtgccgccgggaaaacattgcgccaatcgacggcACCCCCTGCTGCCCACAAGCGGCCAAGCGCTTCCAACACTCCTGCTGCTTCTTCACGTCCGGCGCGCAGCGATGCTAACAAGGT	CGGTTCTGCTTCCGGTAAGCACG	ggctttccggtgcggatccaatgcaccagaaaaccgccttccagatccaccggcgtggtggccagcgggcgccaatcaacacgatagcgggagtcagccagttgatcgctcacttccggtgccagccagtagcgctgcggttcgaacggataattcggcaggtcgaccggcggtgccgccgggaaaacattgcgccaatcgacggcACCCCCTGCTGCCCACAAGCGGCCAAGCGCTTCCAACACTCCTGCTGCTTCTTCACGTCCGGCGCGCAGCGATGCTAACAAGGTCGGTTCTGCTTCCGGTAAGCACG	313	ggctttccggtgcggatccaatgcaccagaaaaccgccttccagatccaccggcgtggtggccagcgggcgccaatcaacacgatagcgggagtcagccagttgatcgctcacttccggtgccagccagtagcgctgcggttcgaacggataattcggcaggtcgaccggcggtgccgccgggaaaacattgcgccaatcgacggcACCCCCTGCTGCCCACAAGCGGCCAAGCGCTTCCAACACTCCTGCTGCTTCTTCACGTCCGGCGCGCAGCGATGCTAACAAGGTCGGTTCTGCTTCCGGTAAGCACG
ds29	R30	ggctttccggtgcggatcca	atgcaccagaaaaccgccttccagatccaccggcgtggtggccagcgggcgccaatcaacacgatagcgggagtcagccagttgatcgctcacttccggtgccagccagtagcgctgcggttcgaacggataattcggcaggtcgaccggcggtgccgccgggaaaacattgcgccaatcgacGGAACCCCCTGCTGCCCACAAGCGGCCAAGCGCTTCCAACACTCCTGCTGCTTCTTCACGTCCGGCGCGCAGCGATGCTAACAAGGT	CGGTTCTGCTTCCGGTAAGCACG	ggctttccggtgcggatccaatgcaccagaaaaccgccttccagatccaccggcgtggtggccagcgggcgccaatcaacacgatagcgggagtcagccagttgatcgctcacttccggtgccagccagtagcgctgcggttcgaacggataattcggcaggtcgaccggcggtgccgccgggaaaacattgcgccaatcgacGGAACCCCCTGCTGCCCACAAGCGGCCAAGCGCTTCCAACACTCCTGCTGCTTCTTCACGTCCGGCGCGCAGCGATGCTAACAAGGTCGGTTCTGCTTCCGGTAAGCACG	313	ggctttccggtgcggatccaatgcaccagaaaaccgccttccagatccaccggcgtggtggccagcgggcgccaatcaacacgatagcgggagtcagccagttgatcgctcacttccggtgccagccagtagcgctgcggttcgaacggataattcggcaggtcgaccggcggtgccgccgggaaaacattgcgccaatcgacGGAACCCCCTGCTGCCCACAAGCGGCCAAGCGCTTCCAACACTCCTGCTGCTTCTTCACGTCCGGCGCGCAGCGATGCTAACAAGGTCGGTTCTGCTTCCGGTAAGCACG
ds30	R31	ggctttccggtgcggatcca	atgcaccagaaaaccgccttccagatccaccggcgtggtggccagcgggcgccaatcaacacgatagcgggagtcagccagttgatcgctcacttccggtgccagccagtagcgctgcggttcgaacggataattcggcaggtcgaccggcggtgccgccgggaaaacattgcgccaatcTACGGAACCCCCTGCTGCCCACAAGCGGCCAAGCGCTTCCAACACTCCTGCTGCTTCTTCACGTCCGGCGCGCAGCGATGCTAACAAGGT	CGGTTCTGCTTCCGGTAAGCACG	ggctttccggtgcggatccaatgcaccagaaaaccgccttccagatccaccggcgtggtggccagcgggcgccaatcaacacgatagcgggagtcagccagttgatcgctcacttccggtgccagccagtagcgctgcggttcgaacggataattcggcaggtcgaccggcggtgccgccgggaaaacattgcgccaatcTACGGAACCCCCTGCTGCCCACAAGCGGCCAAGCGCTTCCAACACTCCTGCTGCTTCTTCACGTCCGGCGCGCAGCGATGCTAACAAGGTCGGTTCTGCTTCCGGTAAGCACG	313	ggctttccggtgcggatccaatgcaccagaaaaccgccttccagatccaccggcgtggtggccagcgggcgccaatcaacacgatagcgggagtcagccagttgatcgctcacttccggtgccagccagtagcgctgcggttcgaacggataattcggcaggtcgaccggcggtgccgccgggaaaacattgcgccaatcTACGGAACCCCCTGCTGCCCACAAGCGGCCAAGCGCTTCCAACACTCCTGCTGCTTCTTCACGTCCGGCGCGCAGCGATGCTAACAAGGTCGGTTCTGCTTCCGGTAAGCACG
ds31	R32	ggctttccggtgcggatcca	atgcaccagaaaaccgccttccagatccaccggcgtggtggccagcgggcgccaatcaacacgatagcgggagtcagccagttgatcgctcacttccggtgccagccagtagcgctgcggttcgaacggataattcggcaggtcgaccggcggtgccgccgggaaaacattgcgccaGGATACGGAACCCCCTGCTGCCCACAAGCGGCCAAGCGCTTCCAACACTCCTGCTGCTTCTTCACGTCCGGCGCGCAGCGATGCTAACAAGGT	CGGTTCTGCTTCCGGTAAGCACG	ggctttccggtgcggatccaatgcaccagaaaaccgccttccagatccaccggcgtggtggccagcgggcgccaatcaacacgatagcgggagtcagccagttgatcgctcacttccggtgccagccagtagcgctgcggttcgaacggataattcggcaggtcgaccggcggtgccgccgggaaaacattgcgccaGGATACGGAACCCCCTGCTGCCCACAAGCGGCCAAGCGCTTCCAACACTCCTGCTGCTTCTTCACGTCCGGCGCGCAGCGATGCTAACAAGGTCGGTTCTGCTTCCGGTAAGCACG	313	ggctttccggtgcggatccaatgcaccagaaaaccgccttccagatccaccggcgtggtggccagcgggcgccaatcaacacgatagcgggagtcagccagttgatcgctcacttccggtgccagccagtagcgctgcggttcgaacggataattcggcaggtcgaccggcggtgccgccgggaaaacattgcgccaGGATACGGAACCCCCTGCTGCCCACAAGCGGCCAAGCGCTTCCAACACTCCTGCTGCTTCTTCACGTCCGGCGCGCAGCGATGCTAACAAGGTCGGTTCTGCTTCCGGTAAGCACG
ds32	R33	ggctttccggtgcggatcca	atgcaccagaaaaccgccttccagatccaccggcgtggtggccagcgggcgccaatcaacacgatagcgggagtcagccagttgatcgctcacttccggtgccagccagtagcgctgcggttcgaacggataattcggcaggtcgaccggcggtgccgccgggaaaacattgcgCCAGGATACGGAACCCCCTGCTGCCCACAAGCGGCCAAGCGCTTCCAACACTCCTGCTGCTTCTTCACGTCCGGCGCGCAGCGATGCTAACAAGGT	CGGTTCTGCTTCCGGTAAGCACG	ggctttccggtgcggatccaatgcaccagaaaaccgccttccagatccaccggcgtggtggccagcgggcgccaatcaacacgatagcgggagtcagccagttgatcgctcacttccggtgccagccagtagcgctgcggttcgaacggataattcggcaggtcgaccggcggtgccgccgggaaaacattgcgCCAGGATACGGAACCCCCTGCTGCCCACAAGCGGCCAAGCGCTTCCAACACTCCTGCTGCTTCTTCACGTCCGGCGCGCAGCGATGCTAACAAGGTCGGTTCTGCTTCCGGTAAGCACG	313	ggctttccggtgcggatccaatgcaccagaaaaccgccttccagatccaccggcgtggtggccagcgggcgccaatcaacacgatagcgggagtcagccagttgatcgctcacttccggtgccagccagtagcgctgcggttcgaacggataattcggcaggtcgaccggcggtgccgccgggaaaacattgcgCCAGGATACGGAACCCCCTGCTGCCCACAAGCGGCCAAGCGCTTCCAACACTCCTGCTGCTTCTTCACGTCCGGCGCGCAGCGATGCTAACAAGGTCGGTTCTGCTTCCGGTAAGCACG
ds33	R34	ggctttccggtgcggatcca	atgcaccagaaaaccgccttccagatccaccggcgtggtggccagcgggcgccaatcaacacgatagcgggagtcagccagttgatcgctcacttccggtgccagccagtagcgctgcggttcgaacggataattcggcaggtcgaccggcggtgccgccgggaaaacattAGGCCAGGATACGGAACCCCCTGCTGCCCACAAGCGGCCAAGCGCTTCCAACACTCCTGCTGCTTCTTCACGTCCGGCGCGCAGCGATGCTAACAAGGT	CGGTTCTGCTTCCGGTAAGCACG	ggctttccggtgcggatccaatgcaccagaaaaccgccttccagatccaccggcgtggtggccagcgggcgccaatcaacacgatagcgggagtcagccagttgatcgctcacttccggtgccagccagtagcgctgcggttcgaacggataattcggcaggtcgaccggcggtgccgccgggaaaacattAGGCCAGGATACGGAACCCCCTGCTGCCCACAAGCGGCCAAGCGCTTCCAACACTCCTGCTGCTTCTTCACGTCCGGCGCGCAGCGATGCTAACAAGGTCGGTTCTGCTTCCGGTAAGCACG	313	ggctttccggtgcggatccaatgcaccagaaaaccgccttccagatccaccggcgtggtggccagcgggcgccaatcaacacgatagcgggagtcagccagttgatcgctcacttccggtgccagccagtagcgctgcggttcgaacggataattcggcaggtcgaccggcggtgccgccgggaaaacattAGGCCAGGATACGGAACCCCCTGCTGCCCACAAGCGGCCAAGCGCTTCCAACACTCCTGCTGCTTCTTCACGTCCGGCGCGCAGCGATGCTAACAAGGTCGGTTCTGCTTCCGGTAAGCACG
ds34	R35	ggctttccggtgcggatcca	atgcaccagaaaaccgccttccagatccaccggcgtggtggccagcgggcgccaatcaacacgatagcgggagtcagccagttgatcgctcacttccggtgccagccagtagcgctgcggttcgaacggataattcggcaggtcgaccggcggtgccgccgggaaaacACCAGGCCAGGATACGGAACCCCCTGCTGCCCACAAGCGGCCAAGCGCTTCCAACACTCCTGCTGCTTCTTCACGTCCGGCGCGCAGCGATGCTAACAAGGT	CGGTTCTGCTTCCGGTAAGCACG	ggctttccggtgcggatccaatgcaccagaaaaccgccttccagatccaccggcgtggtggccagcgggcgccaatcaacacgatagcgggagtcagccagttgatcgctcacttccggtgccagccagtagcgctgcggttcgaacggataattcggcaggtcgaccggcggtgccgccgggaaaacACCAGGCCAGGATACGGAACCCCCTGCTGCCCACAAGCGGCCAAGCGCTTCCAACACTCCTGCTGCTTCTTCACGTCCGGCGCGCAGCGATGCTAACAAGGTCGGTTCTGCTTCCGGTAAGCACG	313	ggctttccggtgcggatccaatgcaccagaaaaccgccttccagatccaccggcgtggtggccagcgggcgccaatcaacacgatagcgggagtcagccagttgatcgctcacttccggtgccagccagtagcgctgcggttcgaacggataattcggcaggtcgaccggcggtgccgccgggaaaacACCAGGCCAGGATACGGAACCCCCTGCTGCCCACAAGCGGCCAAGCGCTTCCAACACTCCTGCTGCTTCTTCACGTCCGGCGCGCAGCGATGCTAACAAGGTCGGTTCTGCTTCCGGTAAGCACG
ds35	R36	ggctttccggtgcggatcca	atgcaccagaaaaccgccttccagatccaccggcgtggtggccagcgggcgccaatcaacacgatagcgggagtcagccagttgatcgctcacttccggtgccagccagtagcgctgcggttcgaacggataattcggcaggtcgaccggcggtgccgccgggaaCACACCAGGCCAGGATACGGAACCCCCTGCTGCCCACAAGCGGCCAAGCGCTTCCAACACTCCTGCTGCTTCTTCACGTCCGGCGCGCAGCGATGCTAACAAGGT	CGGTTCTGCTTCCGGTAAGCACG	ggctttccggtgcggatccaatgcaccagaaaaccgccttccagatccaccggcgtggtggccagcgggcgccaatcaacacgatagcgggagtcagccagttgatcgctcacttccggtgccagccagtagcgctgcggttcgaacggataattcggcaggtcgaccggcggtgccgccgggaaCACACCAGGCCAGGATACGGAACCCCCTGCTGCCCACAAGCGGCCAAGCGCTTCCAACACTCCTGCTGCTTCTTCACGTCCGGCGCGCAGCGATGCTAACAAGGTCGGTTCTGCTTCCGGTAAGCACG	313	ggctttccggtgcggatccaatgcaccagaaaaccgccttccagatccaccggcgtggtggccagcgggcgccaatcaacacgatagcgggagtcagccagttgatcgctcacttccggtgccagccagtagcgctgcggttcgaacggataattcggcaggtcgaccggcggtgccgccgggaaCACACCAGGCCAGGATACGGAACCCCCTGCTGCCCACAAGCGGCCAAGCGCTTCCAACACTCCTGCTGCTTCTTCACGTCCGGCGCGCAGCGATGCTAACAAGGTCGGTTCTGCTTCCGGTAAGCACG
ds36	R37	ggctttccggtgcggatcca	atgcaccagaaaaccgccttccagatccaccggcgtggtggccagcgggcgccaatcaacacgatagcgggagtcagccagttgatcgctcacttccggtgccagccagtagcgctgcggttcgaacggataattcggcaggtcgaccggcggtgccgccggGAACACACCAGGCCAGGATACGGAACCCCCTGCTGCCCACAAGCGGCCAAGCGCTTCCAACACTCCTGCTGCTTCTTCACGTCCGGCGCGCAGCGATGCTAACAAGGT	CGGTTCTGCTTCCGGTAAGCACG	ggctttccggtgcggatccaatgcaccagaaaaccgccttccagatccaccggcgtggtggccagcgggcgccaatcaacacgatagcgggagtcagccagttgatcgctcacttccggtgccagccagtagcgctgcggttcgaacggataattcggcaggtcgaccggcggtgccgccggGAACACACCAGGCCAGGATACGGAACCCCCTGCTGCCCACAAGCGGCCAAGCGCTTCCAACACTCCTGCTGCTTCTTCACGTCCGGCGCGCAGCGATGCTAACAAGGTCGGTTCTGCTTCCGGTAAGCACG	313	ggctttccggtgcggatccaatgcaccagaaaaccgccttccagatccaccggcgtggtggccagcgggcgccaatcaacacgatagcgggagtcagccagttgatcgctcacttccggtgccagccagtagcgctgcggttcgaacggataattcggcaggtcgaccggcggtgccgccggGAACACACCAGGCCAGGATACGGAACCCCCTGCTGCCCACAAGCGGCCAAGCGCTTCCAACACTCCTGCTGCTTCTTCACGTCCGGCGCGCAGCGATGCTAACAAGGTCGGTTCTGCTTCCGGTAAGCACG
ds37	R38	ggctttccggtgcggatcca	atgcaccagaaaaccgccttccagatccaccggcgtggtggccagcgggcgccaatcaacacgatagcgggagtcagccagttgatcgctcacttccggtgccagccagtagcgctgcggttcgaacggataattcggcaggtcgaccggcggtgccgcTGGGAACACACCAGGCCAGGATACGGAACCCCCTGCTGCCCACAAGCGGCCAAGCGCTTCCAACACTCCTGCTGCTTCTTCACGTCCGGCGCGCAGCGATGCTAACAAGGT	CGGTTCTGCTTCCGGTAAGCACG	ggctttccggtgcggatccaatgcaccagaaaaccgccttccagatccaccggcgtggtggccagcgggcgccaatcaacacgatagcgggagtcagccagttgatcgctcacttccggtgccagccagtagcgctgcggttcgaacggataattcggcaggtcgaccggcggtgccgcTGGGAACACACCAGGCCAGGATACGGAACCCCCTGCTGCCCACAAGCGGCCAAGCGCTTCCAACACTCCTGCTGCTTCTTCACGTCCGGCGCGCAGCGATGCTAACAAGGTCGGTTCTGCTTCCGGTAAGCACG	313	ggctttccggtgcggatccaatgcaccagaaaaccgccttccagatccaccggcgtggtggccagcgggcgccaatcaacacgatagcgggagtcagccagttgatcgctcacttccggtgccagccagtagcgctgcggttcgaacggataattcggcaggtcgaccggcggtgccgcTGGGAACACACCAGGCCAGGATACGGAACCCCCTGCTGCCCACAAGCGGCCAAGCGCTTCCAACACTCCTGCTGCTTCTTCACGTCCGGCGCGCAGCGATGCTAACAAGGTCGGTTCTGCTTCCGGTAAGCACG
ds38	R39	ggctttccggtgcggatcca	atgcaccagaaaaccgccttccagatccaccggcgtggtggccagcgggcgccaatcaacacgatagcgggagtcagccagttgatcgctcacttccggtgccagccagtagcgctgcggttcgaacggataattcggcaggtcgaccggcggtgcAGTTGGGAACACACCAGGCCAGGATACGGAACCCCCTGCTGCCCACAAGCGGCCAAGCGCTTCCAACACTCCTGCTGCTTCTTCACGTCCGGCGCGCAGCGATGCTAACAAGGT	CGGTTCTGCTTCCGGTAAGCACG	ggctttccggtgcggatccaatgcaccagaaaaccgccttccagatccaccggcgtggtggccagcgggcgccaatcaacacgatagcgggagtcagccagttgatcgctcacttccggtgccagccagtagcgctgcggttcgaacggataattcggcaggtcgaccggcggtgcAGTTGGGAACACACCAGGCCAGGATACGGAACCCCCTGCTGCCCACAAGCGGCCAAGCGCTTCCAACACTCCTGCTGCTTCTTCACGTCCGGCGCGCAGCGATGCTAACAAGGTCGGTTCTGCTTCCGGTAAGCACG	313	ggctttccggtgcggatccaatgcaccagaaaaccgccttccagatccaccggcgtggtggccagcgggcgccaatcaacacgatagcgggagtcagccagttgatcgctcacttccggtgccagccagtagcgctgcggttcgaacggataattcggcaggtcgaccggcggtgcAGTTGGGAACACACCAGGCCAGGATACGGAACCCCCTGCTGCCCACAAGCGGCCAAGCGCTTCCAACACTCCTGCTGCTTCTTCACGTCCGGCGCGCAGCGATGCTAACAAGGTCGGTTCTGCTTCCGGTAAGCACG
ds39a	R40	ggctttccggtgcggatcca	atgcaccagaaaaccgccttccagatccaccggcgtggtggccagcgggcgccaatcaacacgatagcgggagtcagccagttgatcgctcacttccggtgccagccagtagcgctgcggttcgaacggataattcggcaggtcgaccggcggGGCAGTTGGGAACACACCAGGCCAGGATACGGAACCCCCTGCTGCCCACAAGCGGCCAAGCGCTTCCAACACTCCTGCTGCTTCTTCACGTCCGGCGCGCAGCGATGCTAACAAGGT	CGGTTCTGCTTCCGGTAAGCACG	ggctttccggtgcggatccaatgcaccagaaaaccgccttccagatccaccggcgtggtggccagcgggcgccaatcaacacgatagcgggagtcagccagttgatcgctcacttccggtgccagccagtagcgctgcggttcgaacggataattcggcaggtcgaccggcggGGCAGTTGGGAACACACCAGGCCAGGATACGGAACCCCCTGCTGCCCACAAGCGGCCAAGCGCTTCCAACACTCCTGCTGCTTCTTCACGTCCGGCGCGCAGCGATGCTAACAAGGTCGGTTCTGCTTCCGGTAAGCACG	313	ggctttccggtgcggatccaatgcaccagaaaaccgccttccagatccaccggcgtggtggccagcgggcgccaatcaacacgatagcgggagtcagccagttgatcgctcacttccggtgccagccagtagcgctgcggttcgaacggataattcggcaggtcgaccggcggGGCAGTTGGGAACACACCAGGCCAGGATACGGAACCCCCTGCTGCCCACAAGCGGCCAAGCGCTTCCAACACTCCTGCTGCTTCTTCACGTCCGGCGCGCAGCGATGCTAACAAGGTCGGTTCTGCTTCCGGTAAGCACG
ds39b	R41	ggctttccggtgcggatcca	atgcaccagaaaaccgccttccagatccaccggcgtggtggccagcgggcgccaatcaacacgatagcgggagtcagccagttgatcgctcacttccggtgccagccagtagcgctgcggttcgaacggataattcggcaggtcgaccggcggACCGGCAGTTGGGAACACACCAGGCCAGGATACGGAACCCCCTGCTGCCCACAAGCGGCCAAGCGCTTCCAACACTCCTGCTGCTTCTTCACGTCCGGCGCGCAGCGATGCTAACAAGGT	CGGTTCTGCTTCCGGTAAGCACG	ggctttccggtgcggatccaatgcaccagaaaaccgccttccagatccaccggcgtggtggccagcgggcgccaatcaacacgatagcgggagtcagccagttgatcgctcacttccggtgccagccagtagcgctgcggttcgaacggataattcggcaggtcgaccggcggACCGGCAGTTGGGAACACACCAGGCCAGGATACGGAACCCCCTGCTGCCCACAAGCGGCCAAGCGCTTCCAACACTCCTGCTGCTTCTTCACGTCCGGCGCGCAGCGATGCTAACAAGGTCGGTTCTGCTTCCGGTAAGCACG	316	ggctttccggtgcggatccaatgcaccagaaaaccgccttccagatccaccggcgtggtggccagcgggcgccaatcaacacgatagcgggagtcagccagttgatcgctcacttccggtgccagccagtagcgctgcggttcgaacggataattcggcaggtcgaccggcggACCGGCAGTTGGGAACACACCAGGCCAGGATACGGAACCCCCTGCTGCCCACAAGCGGCCAAGCGCTTCCAACACTCCTGCTGCTTCTTCACGTCCGGCGCGCAGCGATGCTAACAAGGTCGGTTCTGCTTCCGGTAAGCACG
ds40	R42	ggctttccggtgcggatcca	atgcaccagaaaaccgccttccagatccaccggcgtggtggccagcgggcgccaatcaacacgatagcgggagtcagccagttgatcgctcacttccggtgccagccagtagcgctgcggttcgaacggataattcggcaggtcgaccggGCGACCGGCAGTTGGGAACACACCAGGCCAGGATACGGAACCCCCTGCTGCCCACAAGCGGCCAAGCGCTTCCAACACTCCTGCTGCTTCTTCACGTCCGGCGCGCAGCGATGCTAACAAGGT	CGGTTCTGCTTCCGGTAAGCACG	ggctttccggtgcggatccaatgcaccagaaaaccgccttccagatccaccggcgtggtggccagcgggcgccaatcaacacgatagcgggagtcagccagttgatcgctcacttccggtgccagccagtagcgctgcggttcgaacggataattcggcaggtcgaccggGCGACCGGCAGTTGGGAACACACCAGGCCAGGATACGGAACCCCCTGCTGCCCACAAGCGGCCAAGCGCTTCCAACACTCCTGCTGCTTCTTCACGTCCGGCGCGCAGCGATGCTAACAAGGTCGGTTCTGCTTCCGGTAAGCACG	316	ggctttccggtgcggatccaatgcaccagaaaaccgccttccagatccaccggcgtggtggccagcgggcgccaatcaacacgatagcgggagtcagccagttgatcgctcacttccggtgccagccagtagcgctgcggttcgaacggataattcggcaggtcgaccggGCGACCGGCAGTTGGGAACACACCAGGCCAGGATACGGAACCCCCTGCTGCCCACAAGCGGCCAAGCGCTTCCAACACTCCTGCTGCTTCTTCACGTCCGGCGCGCAGCGATGCTAACAAGGTCGGTTCTGCTTCCGGTAAGCACG
ds41	R43	ggctttccggtgcggatcca	atgcaccagaaaaccgccttccagatccaccggcgtggtggccagcgggcgccaatcaacacgatagcgggagtcagccagttgatcgctcacttccggtgccagccagtagcgctgcggttcgaacggataattcggcaggtcgacGCGGCGACCGGCAGTTGGGAACACACCAGGCCAGGATACGGAACCCCCTGCTGCCCACAAGCGGCCAAGCGCTTCCAACACTCCTGCTGCTTCTTCACGTCCGGCGCGCAGCGATGCTAACAAGGT	CGGTTCTGCTTCCGGTAAGCACG	ggctttccggtgcggatccaatgcaccagaaaaccgccttccagatccaccggcgtggtggccagcgggcgccaatcaacacgatagcgggagtcagccagttgatcgctcacttccggtgccagccagtagcgctgcggttcgaacggataattcggcaggtcgacGCGGCGACCGGCAGTTGGGAACACACCAGGCCAGGATACGGAACCCCCTGCTGCCCACAAGCGGCCAAGCGCTTCCAACACTCCTGCTGCTTCTTCACGTCCGGCGCGCAGCGATGCTAACAAGGTCGGTTCTGCTTCCGGTAAGCACG	316	ggctttccggtgcggatccaatgcaccagaaaaccgccttccagatccaccggcgtggtggccagcgggcgccaatcaacacgatagcgggagtcagccagttgatcgctcacttccggtgccagccagtagcgctgcggttcgaacggataattcggcaggtcgacGCGGCGACCGGCAGTTGGGAACACACCAGGCCAGGATACGGAACCCCCTGCTGCCCACAAGCGGCCAAGCGCTTCCAACACTCCTGCTGCTTCTTCACGTCCGGCGCGCAGCGATGCTAACAAGGTCGGTTCTGCTTCCGGTAAGCACG
ds42	R44	ggctttccggtgcggatcca	atgcaccagaaaaccgccttccagatccaccggcgtggtggccagcgggcgccaatcaacacgatagcgggagtcagccagttgatcgctcacttccggtgccagccagtagcgctgcggttcgaacggataattcggcaggtcCACGCGGCGACCGGCAGTTGGGAACACACCAGGCCAGGATACGGAACCCCCTGCTGCCCACAAGCGGCCAAGCGCTTCCAACACTCCTGCTGCTTCTTCACGTCCGGCGCGCAGCGATGCTAACAAGGT	CGGTTCTGCTTCCGGTAAGCACG	ggctttccggtgcggatccaatgcaccagaaaaccgccttccagatccaccggcgtggtggccagcgggcgccaatcaacacgatagcgggagtcagccagttgatcgctcacttccggtgccagccagtagcgctgcggttcgaacggataattcggcaggtcCACGCGGCGACCGGCAGTTGGGAACACACCAGGCCAGGATACGGAACCCCCTGCTGCCCACAAGCGGCCAAGCGCTTCCAACACTCCTGCTGCTTCTTCACGTCCGGCGCGCAGCGATGCTAACAAGGTCGGTTCTGCTTCCGGTAAGCACG	316	ggctttccggtgcggatccaatgcaccagaaaaccgccttccagatccaccggcgtggtggccagcgggcgccaatcaacacgatagcgggagtcagccagttgatcgctcacttccggtgccagccagtagcgctgcggttcgaacggataattcggcaggtcCACGCGGCGACCGGCAGTTGGGAACACACCAGGCCAGGATACGGAACCCCCTGCTGCCCACAAGCGGCCAAGCGCTTCCAACACTCCTGCTGCTTCTTCACGTCCGGCGCGCAGCGATGCTAACAAGGTCGGTTCTGCTTCCGGTAAGCACG
ds43	R45	ggctttccggtgcggatcca	atgcaccagaaaaccgccttccagatccaccggcgtggtggccagcgggcgccaatcaacacgatagcgggagtcagccagttgatcgctcacttccggtgccagccagtagcgctgcggttcgaacggataattcggcagAGGCACGCGGCGACCGGCAGTTGGGAACACACCAGGCCAGGATACGGAACCCCCTGCTGCCCACAAGCGGCCAAGCGCTTCCAACACTCCTGCTGCTTCTTCACGTCCGGCGCGCAGCGATGCTAACAAGGT	CGGTTCTGCTTCCGGTAAGCACG	ggctttccggtgcggatccaatgcaccagaaaaccgccttccagatccaccggcgtggtggccagcgggcgccaatcaacacgatagcgggagtcagccagttgatcgctcacttccggtgccagccagtagcgctgcggttcgaacggataattcggcagAGGCACGCGGCGACCGGCAGTTGGGAACACACCAGGCCAGGATACGGAACCCCCTGCTGCCCACAAGCGGCCAAGCGCTTCCAACACTCCTGCTGCTTCTTCACGTCCGGCGCGCAGCGATGCTAACAAGGTCGGTTCTGCTTCCGGTAAGCACG	316	ggctttccggtgcggatccaatgcaccagaaaaccgccttccagatccaccggcgtggtggccagcgggcgccaatcaacacgatagcgggagtcagccagttgatcgctcacttccggtgccagccagtagcgctgcggttcgaacggataattcggcagAGGCACGCGGCGACCGGCAGTTGGGAACACACCAGGCCAGGATACGGAACCCCCTGCTGCCCACAAGCGGCCAAGCGCTTCCAACACTCCTGCTGCTTCTTCACGTCCGGCGCGCAGCGATGCTAACAAGGTCGGTTCTGCTTCCGGTAAGCACG
ds44	R46	ggctttccggtgcggatcca	atgcaccagaaaaccgccttccagatccaccggcgtggtggccagcgggcgccaatcaacacgatagcgggagtcagccagttgatcgctcacttccggtgccagccagtagcgctgcggttcgaacggataattcggAAGAGGCACGCGGCGACCGGCAGTTGGGAACACACCAGGCCAGGATACGGAACCCCCTGCTGCCCACAAGCGGCCAAGCGCTTCCAACACTCCTGCTGCTTCTTCACGTCCGGCGCGCAGCGATGCTAACAAGGT	CGGTTCTGCTTCCGGTAAGCACG	ggctttccggtgcggatccaatgcaccagaaaaccgccttccagatccaccggcgtggtggccagcgggcgccaatcaacacgatagcgggagtcagccagttgatcgctcacttccggtgccagccagtagcgctgcggttcgaacggataattcggAAGAGGCACGCGGCGACCGGCAGTTGGGAACACACCAGGCCAGGATACGGAACCCCCTGCTGCCCACAAGCGGCCAAGCGCTTCCAACACTCCTGCTGCTTCTTCACGTCCGGCGCGCAGCGATGCTAACAAGGTCGGTTCTGCTTCCGGTAAGCACG	316	ggctttccggtgcggatccaatgcaccagaaaaccgccttccagatccaccggcgtggtggccagcgggcgccaatcaacacgatagcgggagtcagccagttgatcgctcacttccggtgccagccagtagcgctgcggttcgaacggataattcggAAGAGGCACGCGGCGACCGGCAGTTGGGAACACACCAGGCCAGGATACGGAACCCCCTGCTGCCCACAAGCGGCCAAGCGCTTCCAACACTCCTGCTGCTTCTTCACGTCCGGCGCGCAGCGATGCTAACAAGGTCGGTTCTGCTTCCGGTAAGCACG
ds45	R47	ggctttccggtgcggatcca	atgcaccagaaaaccgccttccagatccaccggcgtggtggccagcgggcgccaatcaacacgatagcgggagtcagccagttgatcgctcacttccggtgccagccagtagcgctgcggttcgaacggataattAGGAAGAGGCACGCGGCGACCGGCAGTTGGGAACACACCAGGCCAGGATACGGAACCCCCTGCTGCCCACAAGCGGCCAAGCGCTTCCAACACTCCTGCTGCTTCTTCACGTCCGGCGCGCAGCGATGCTAACAAGGT	CGGTTCTGCTTCCGGTAAGCACG	ggctttccggtgcggatccaatgcaccagaaaaccgccttccagatccaccggcgtggtggccagcgggcgccaatcaacacgatagcgggagtcagccagttgatcgctcacttccggtgccagccagtagcgctgcggttcgaacggataattAGGAAGAGGCACGCGGCGACCGGCAGTTGGGAACACACCAGGCCAGGATACGGAACCCCCTGCTGCCCACAAGCGGCCAAGCGCTTCCAACACTCCTGCTGCTTCTTCACGTCCGGCGCGCAGCGATGCTAACAAGGTCGGTTCTGCTTCCGGTAAGCACG	316	ggctttccggtgcggatccaatgcaccagaaaaccgccttccagatccaccggcgtggtggccagcgggcgccaatcaacacgatagcgggagtcagccagttgatcgctcacttccggtgccagccagtagcgctgcggttcgaacggataattAGGAAGAGGCACGCGGCGACCGGCAGTTGGGAACACACCAGGCCAGGATACGGAACCCCCTGCTGCCCACAAGCGGCCAAGCGCTTCCAACACTCCTGCTGCTTCTTCACGTCCGGCGCGCAGCGATGCTAACAAGGTCGGTTCTGCTTCCGGTAAGCACG
ds46	R48	ggctttccggtgcggatcca	atgcaccagaaaaccgccttccagatccaccggcgtggtggccagcgggcgccaatcaacacgatagcgggagtcagccagttgatcgctcacttccggtgccagccagtagcgctgcggttcgaacggataCGTAGGAAGAGGCACGCGGCGACCGGCAGTTGGGAACACACCAGGCCAGGATACGGAACCCCCTGCTGCCCACAAGCGGCCAAGCGCTTCCAACACTCCTGCTGCTTCTTCACGTCCGGCGCGCAGCGATGCTAACAAGGT	CGGTTCTGCTTCCGGTAAGCACG	ggctttccggtgcggatccaatgcaccagaaaaccgccttccagatccaccggcgtggtggccagcgggcgccaatcaacacgatagcgggagtcagccagttgatcgctcacttccggtgccagccagtagcgctgcggttcgaacggataCGTAGGAAGAGGCACGCGGCGACCGGCAGTTGGGAACACACCAGGCCAGGATACGGAACCCCCTGCTGCCCACAAGCGGCCAAGCGCTTCCAACACTCCTGCTGCTTCTTCACGTCCGGCGCGCAGCGATGCTAACAAGGTCGGTTCTGCTTCCGGTAAGCACG	316	ggctttccggtgcggatccaatgcaccagaaaaccgccttccagatccaccggcgtggtggccagcgggcgccaatcaacacgatagcgggagtcagccagttgatcgctcacttccggtgccagccagtagcgctgcggttcgaacggataCGTAGGAAGAGGCACGCGGCGACCGGCAGTTGGGAACACACCAGGCCAGGATACGGAACCCCCTGCTGCCCACAAGCGGCCAAGCGCTTCCAACACTCCTGCTGCTTCTTCACGTCCGGCGCGCAGCGATGCTAACAAGGTCGGTTCTGCTTCCGGTAAGCACG
ds47	R49	ggctttccggtgcggatcca	atgcaccagaaaaccgccttccagatccaccggcgtggtggccagcgggcgccaatcaacacgatagcgggagtcagccagttgatcgctcacttccggtgccagccagtagcgctgcggttcgaacggGTACGTAGGAAGAGGCACGCGGCGACCGGCAGTTGGGAACACACCAGGCCAGGATACGGAACCCCCTGCTGCCCACAAGCGGCCAAGCGCTTCCAACACTCCTGCTGCTTCTTCACGTCCGGCGCGCAGCGATGCTAACAAGGT	CGGTTCTGCTTCCGGTAAGCACG	ggctttccggtgcggatccaatgcaccagaaaaccgccttccagatccaccggcgtggtggccagcgggcgccaatcaacacgatagcgggagtcagccagttgatcgctcacttccggtgccagccagtagcgctgcggttcgaacggGTACGTAGGAAGAGGCACGCGGCGACCGGCAGTTGGGAACACACCAGGCCAGGATACGGAACCCCCTGCTGCCCACAAGCGGCCAAGCGCTTCCAACACTCCTGCTGCTTCTTCACGTCCGGCGCGCAGCGATGCTAACAAGGTCGGTTCTGCTTCCGGTAAGCACG	316	ggctttccggtgcggatccaatgcaccagaaaaccgccttccagatccaccggcgtggtggccagcgggcgccaatcaacacgatagcgggagtcagccagttgatcgctcacttccggtgccagccagtagcgctgcggttcgaacggGTACGTAGGAAGAGGCACGCGGCGACCGGCAGTTGGGAACACACCAGGCCAGGATACGGAACCCCCTGCTGCCCACAAGCGGCCAAGCGCTTCCAACACTCCTGCTGCTTCTTCACGTCCGGCGCGCAGCGATGCTAACAAGGTCGGTTCTGCTTCCGGTAAGCACG
ds48	R50	ggctttccggtgcggatcca	atgcaccagaaaaccgccttccagatccaccggcgtggtggccagcgggcgccaatcaacacgatagcgggagtcagccagttgatcgctcacttccggtgccagccagtagcgctgcggttcgaaAGGGTACGTAGGAAGAGGCACGCGGCGACCGGCAGTTGGGAACACACCAGGCCAGGATACGGAACCCCCTGCTGCCCACAAGCGGCCAAGCGCTTCCAACACTCCTGCTGCTTCTTCACGTCCGGCGCGCAGCGATGCTAACAAGGT	CGGTTCTGCTTCCGGTAAGCACG	ggctttccggtgcggatccaatgcaccagaaaaccgccttccagatccaccggcgtggtggccagcgggcgccaatcaacacgatagcgggagtcagccagttgatcgctcacttccggtgccagccagtagcgctgcggttcgaaAGGGTACGTAGGAAGAGGCACGCGGCGACCGGCAGTTGGGAACACACCAGGCCAGGATACGGAACCCCCTGCTGCCCACAAGCGGCCAAGCGCTTCCAACACTCCTGCTGCTTCTTCACGTCCGGCGCGCAGCGATGCTAACAAGGTCGGTTCTGCTTCCGGTAAGCACG	316	ggctttccggtgcggatccaatgcaccagaaaaccgccttccagatccaccggcgtggtggccagcgggcgccaatcaacacgatagcgggagtcagccagttgatcgctcacttccggtgccagccagtagcgctgcggttcgaaAGGGTACGTAGGAAGAGGCACGCGGCGACCGGCAGTTGGGAACACACCAGGCCAGGATACGGAACCCCCTGCTGCCCACAAGCGGCCAAGCGCTTCCAACACTCCTGCTGCTTCTTCACGTCCGGCGCGCAGCGATGCTAACAAGGTCGGTTCTGCTTCCGGTAAGCACG
ds49	R51	ggctttccggtgcggatcca	atgcaccagaaaaccgccttccagatccaccggcgtggtggccagcgggcgccaatcaacacgatagcgggagtcagccagttgatcgctcacttccggtgccagccagtagcgctgcggttcCCAAGGGTACGTAGGAAGAGGCACGCGGCGACCGGCAGTTGGGAACACACCAGGCCAGGATACGGAACCCCCTGCTGCCCACAAGCGGCCAAGCGCTTCCAACACTCCTGCTGCTTCTTCACGTCCGGCGCGCAGCGATGCTAACAAGGT	CGGTTCTGCTTCCGGTAAGCACG	ggctttccggtgcggatccaatgcaccagaaaaccgccttccagatccaccggcgtggtggccagcgggcgccaatcaacacgatagcgggagtcagccagttgatcgctcacttccggtgccagccagtagcgctgcggttcCCAAGGGTACGTAGGAAGAGGCACGCGGCGACCGGCAGTTGGGAACACACCAGGCCAGGATACGGAACCCCCTGCTGCCCACAAGCGGCCAAGCGCTTCCAACACTCCTGCTGCTTCTTCACGTCCGGCGCGCAGCGATGCTAACAAGGTCGGTTCTGCTTCCGGTAAGCACG	316	ggctttccggtgcggatccaatgcaccagaaaaccgccttccagatccaccggcgtggtggccagcgggcgccaatcaacacgatagcgggagtcagccagttgatcgctcacttccggtgccagccagtagcgctgcggttcCCAAGGGTACGTAGGAAGAGGCACGCGGCGACCGGCAGTTGGGAACACACCAGGCCAGGATACGGAACCCCCTGCTGCCCACAAGCGGCCAAGCGCTTCCAACACTCCTGCTGCTTCTTCACGTCCGGCGCGCAGCGATGCTAACAAGGTCGGTTCTGCTTCCGGTAAGCACG
ds50	R52	ggctttccggtgcggatcca	atgcaccagaaaaccgccttccagatccaccggcgtggtggccagcgggcgccaatcaacacgatagcgggagtcagccagttgatcgctcacttccggtgccagccagtagcgctgcggCTGCCAAGGGTACGTAGGAAGAGGCACGCGGCGACCGGCAGTTGGGAACACACCAGGCCAGGATACGGAACCCCCTGCTGCCCACAAGCGGCCAAGCGCTTCCAACACTCCTGCTGCTTCTTCACGTCCGGCGCGCAGCGATGCTAACAAGGT	CGGTTCTGCTTCCGGTAAGCACG	ggctttccggtgcggatccaatgcaccagaaaaccgccttccagatccaccggcgtggtggccagcgggcgccaatcaacacgatagcgggagtcagccagttgatcgctcacttccggtgccagccagtagcgctgcggCTGCCAAGGGTACGTAGGAAGAGGCACGCGGCGACCGGCAGTTGGGAACACACCAGGCCAGGATACGGAACCCCCTGCTGCCCACAAGCGGCCAAGCGCTTCCAACACTCCTGCTGCTTCTTCACGTCCGGCGCGCAGCGATGCTAACAAGGTCGGTTCTGCTTCCGGTAAGCACG	316	ggctttccggtgcggatccaatgcaccagaaaaccgccttccagatccaccggcgtggtggccagcgggcgccaatcaacacgatagcgggagtcagccagttgatcgctcacttccggtgccagccagtagcgctgcggCTGCCAAGGGTACGTAGGAAGAGGCACGCGGCGACCGGCAGTTGGGAACACACCAGGCCAGGATACGGAACCCCCTGCTGCCCACAAGCGGCCAAGCGCTTCCAACACTCCTGCTGCTTCTTCACGTCCGGCGCGCAGCGATGCTAACAAGGTCGGTTCTGCTTCCGGTAAGCACG
ds51	R53	ggctttccggtgcggatcca	atgcaccagaaaaccgccttccagatccaccggcgtggtggccagcgggcgccaatcaacacgatagcgggagtcagccagttgatcgctcacttccggtgccagccagtagcgctgACGCTGCCAAGGGTACGTAGGAAGAGGCACGCGGCGACCGGCAGTTGGGAACACACCAGGCCAGGATACGGAACCCCCTGCTGCCCACAAGCGGCCAAGCGCTTCCAACACTCCTGCTGCTTCTTCACGTCCGGCGCGCAGCGATGCTAACAAGGT	CGGTTCTGCTTCCGGTAAGCACG	ggctttccggtgcggatccaatgcaccagaaaaccgccttccagatccaccggcgtggtggccagcgggcgccaatcaacacgatagcgggagtcagccagttgatcgctcacttccggtgccagccagtagcgctgACGCTGCCAAGGGTACGTAGGAAGAGGCACGCGGCGACCGGCAGTTGGGAACACACCAGGCCAGGATACGGAACCCCCTGCTGCCCACAAGCGGCCAAGCGCTTCCAACACTCCTGCTGCTTCTTCACGTCCGGCGCGCAGCGATGCTAACAAGGTCGGTTCTGCTTCCGGTAAGCACG	316	ggctttccggtgcggatccaatgcaccagaaaaccgccttccagatccaccggcgtggtggccagcgggcgccaatcaacacgatagcgggagtcagccagttgatcgctcacttccggtgccagccagtagcgctgACGCTGCCAAGGGTACGTAGGAAGAGGCACGCGGCGACCGGCAGTTGGGAACACACCAGGCCAGGATACGGAACCCCCTGCTGCCCACAAGCGGCCAAGCGCTTCCAACACTCCTGCTGCTTCTTCACGTCCGGCGCGCAGCGATGCTAACAAGGTCGGTTCTGCTTCCGGTAAGCACG
ds52	R54	ggctttccggtgcggatcca	atgcaccagaaaaccgccttccagatccaccggcgtggtggccagcgggcgccaatcaacacgatagcgggagtcagccagttgatcgctcacttccggtgccagccagtagcgCTGACGCTGCCAAGGGTACGTAGGAAGAGGCACGCGGCGACCGGCAGTTGGGAACACACCAGGCCAGGATACGGAACCCCCTGCTGCCCACAAGCGGCCAAGCGCTTCCAACACTCCTGCTGCTTCTTCACGTCCGGCGCGCAGCGATGCTAACAAGGT	CGGTTCTGCTTCCGGTAAGCACG	ggctttccggtgcggatccaatgcaccagaaaaccgccttccagatccaccggcgtggtggccagcgggcgccaatcaacacgatagcgggagtcagccagttgatcgctcacttccggtgccagccagtagcgCTGACGCTGCCAAGGGTACGTAGGAAGAGGCACGCGGCGACCGGCAGTTGGGAACACACCAGGCCAGGATACGGAACCCCCTGCTGCCCACAAGCGGCCAAGCGCTTCCAACACTCCTGCTGCTTCTTCACGTCCGGCGCGCAGCGATGCTAACAAGGTCGGTTCTGCTTCCGGTAAGCACG	316	ggctttccggtgcggatccaatgcaccagaaaaccgccttccagatccaccggcgtggtggccagcgggcgccaatcaacacgatagcgggagtcagccagttgatcgctcacttccggtgccagccagtagcgCTGACGCTGCCAAGGGTACGTAGGAAGAGGCACGCGGCGACCGGCAGTTGGGAACACACCAGGCCAGGATACGGAACCCCCTGCTGCCCACAAGCGGCCAAGCGCTTCCAACACTCCTGCTGCTTCTTCACGTCCGGCGCGCAGCGATGCTAACAAGGTCGGTTCTGCTTCCGGTAAGCACG
ds53	R55	ggctttccggtgcggatcca	atgcaccagaaaaccgccttccagatccaccggcgtggtggccagcgggcgccaatcaacacgatagcgggagtcagccagttgatcgctcacttccggtgccagccagtaACGCTGACGCTGCCAAGGGTACGTAGGAAGAGGCACGCGGCGACCGGCAGTTGGGAACACACCAGGCCAGGATACGGAACCCCCTGCTGCCCACAAGCGGCCAAGCGCTTCCAACACTCCTGCTGCTTCTTCACGTCCGGCGCGCAGCGATGCTAACAAGGT	CGGTTCTGCTTCCGGTAAGCACG	ggctttccggtgcggatccaatgcaccagaaaaccgccttccagatccaccggcgtggtggccagcgggcgccaatcaacacgatagcgggagtcagccagttgatcgctcacttccggtgccagccagtaACGCTGACGCTGCCAAGGGTACGTAGGAAGAGGCACGCGGCGACCGGCAGTTGGGAACACACCAGGCCAGGATACGGAACCCCCTGCTGCCCACAAGCGGCCAAGCGCTTCCAACACTCCTGCTGCTTCTTCACGTCCGGCGCGCAGCGATGCTAACAAGGTCGGTTCTGCTTCCGGTAAGCACG	316	ggctttccggtgcggatccaatgcaccagaaaaccgccttccagatccaccggcgtggtggccagcgggcgccaatcaacacgatagcgggagtcagccagttgatcgctcacttccggtgccagccagtaACGCTGACGCTGCCAAGGGTACGTAGGAAGAGGCACGCGGCGACCGGCAGTTGGGAACACACCAGGCCAGGATACGGAACCCCCTGCTGCCCACAAGCGGCCAAGCGCTTCCAACACTCCTGCTGCTTCTTCACGTCCGGCGCGCAGCGATGCTAACAAGGTCGGTTCTGCTTCCGGTAAGCACG
ds54	R56	ggctttccggtgcggatcca	atgcaccagaaaaccgccttccagatccaccggcgtggtggccagcgggcgccaatcaacacgatagcgggagtcagccagttgatcgctcacttccggtgccagccaATAACGCTGACGCTGCCAAGGGTACGTAGGAAGAGGCACGCGGCGACCGGCAGTTGGGAACACACCAGGCCAGGATACGGAACCCCCTGCTGCCCACAAGCGGCCAAGCGCTTCCAACACTCCTGCTGCTTCTTCACGTCCGGCGCGCAGCGATGCTAACAAGGT	CGGTTCTGCTTCCGGTAAGCACG	ggctttccggtgcggatccaatgcaccagaaaaccgccttccagatccaccggcgtggtggccagcgggcgccaatcaacacgatagcgggagtcagccagttgatcgctcacttccggtgccagccaATAACGCTGACGCTGCCAAGGGTACGTAGGAAGAGGCACGCGGCGACCGGCAGTTGGGAACACACCAGGCCAGGATACGGAACCCCCTGCTGCCCACAAGCGGCCAAGCGCTTCCAACACTCCTGCTGCTTCTTCACGTCCGGCGCGCAGCGATGCTAACAAGGTCGGTTCTGCTTCCGGTAAGCACG	316	ggctttccggtgcggatccaatgcaccagaaaaccgccttccagatccaccggcgtggtggccagcgggcgccaatcaacacgatagcgggagtcagccagttgatcgctcacttccggtgccagccaATAACGCTGACGCTGCCAAGGGTACGTAGGAAGAGGCACGCGGCGACCGGCAGTTGGGAACACACCAGGCCAGGATACGGAACCCCCTGCTGCCCACAAGCGGCCAAGCGCTTCCAACACTCCTGCTGCTTCTTCACGTCCGGCGCGCAGCGATGCTAACAAGGTCGGTTCTGCTTCCGGTAAGCACG
ds55	R57	ggctttccggtgcggatcca	atgcaccagaaaaccgccttccagatccaccggcgtggtggccagcgggcgccaatcaacacgatagcgggagtcagccagttgatcgctcacttccggtgccagCCAATAACGCTGACGCTGCCAAGGGTACGTAGGAAGAGGCACGCGGCGACCGGCAGTTGGGAACACACCAGGCCAGGATACGGAACCCCCTGCTGCCCACAAGCGGCCAAGCGCTTCCAACACTCCTGCTGCTTCTTCACGTCCGGCGCGCAGCGATGCTAACAAGGT	CGGTTCTGCTTCCGGTAAGCACG	ggctttccggtgcggatccaatgcaccagaaaaccgccttccagatccaccggcgtggtggccagcgggcgccaatcaacacgatagcgggagtcagccagttgatcgctcacttccggtgccagCCAATAACGCTGACGCTGCCAAGGGTACGTAGGAAGAGGCACGCGGCGACCGGCAGTTGGGAACACACCAGGCCAGGATACGGAACCCCCTGCTGCCCACAAGCGGCCAAGCGCTTCCAACACTCCTGCTGCTTCTTCACGTCCGGCGCGCAGCGATGCTAACAAGGTCGGTTCTGCTTCCGGTAAGCACG	316	ggctttccggtgcggatccaatgcaccagaaaaccgccttccagatccaccggcgtggtggccagcgggcgccaatcaacacgatagcgggagtcagccagttgatcgctcacttccggtgccagCCAATAACGCTGACGCTGCCAAGGGTACGTAGGAAGAGGCACGCGGCGACCGGCAGTTGGGAACACACCAGGCCAGGATACGGAACCCCCTGCTGCCCACAAGCGGCCAAGCGCTTCCAACACTCCTGCTGCTTCTTCACGTCCGGCGCGCAGCGATGCTAACAAGGTCGGTTCTGCTTCCGGTAAGCACG
ds56	R58	ggctttccggtgcggatcca	atgcaccagaaaaccgccttccagatccaccggcgtggtggccagcgggcgccaatcaacacgatagcgggagtcagccagttgatcgctcacttccggtgcGGGCCAATAACGCTGACGCTGCCAAGGGTACGTAGGAAGAGGCACGCGGCGACCGGCAGTTGGGAACACACCAGGCCAGGATACGGAACCCCCTGCTGCCCACAAGCGGCCAAGCGCTTCCAACACTCCTGCTGCTTCTTCACGTCCGGCGCGCAGCGATGCTAACAAGGT	CGGTTCTGCTTCCGGTAAGCACG	ggctttccggtgcggatccaatgcaccagaaaaccgccttccagatccaccggcgtggtggccagcgggcgccaatcaacacgatagcgggagtcagccagttgatcgctcacttccggtgcGGGCCAATAACGCTGACGCTGCCAAGGGTACGTAGGAAGAGGCACGCGGCGACCGGCAGTTGGGAACACACCAGGCCAGGATACGGAACCCCCTGCTGCCCACAAGCGGCCAAGCGCTTCCAACACTCCTGCTGCTTCTTCACGTCCGGCGCGCAGCGATGCTAACAAGGTCGGTTCTGCTTCCGGTAAGCACG	316	ggctttccggtgcggatccaatgcaccagaaaaccgccttccagatccaccggcgtggtggccagcgggcgccaatcaacacgatagcgggagtcagccagttgatcgctcacttccggtgcGGGCCAATAACGCTGACGCTGCCAAGGGTACGTAGGAAGAGGCACGCGGCGACCGGCAGTTGGGAACACACCAGGCCAGGATACGGAACCCCCTGCTGCCCACAAGCGGCCAAGCGCTTCCAACACTCCTGCTGCTTCTTCACGTCCGGCGCGCAGCGATGCTAACAAGGTCGGTTCTGCTTCCGGTAAGCACG
ds57	R59	ggctttccggtgcggatcca	atgcaccagaaaaccgccttccagatccaccggcgtggtggccagcgggcgccaatcaacacgatagcgggagtcagccagttgatcgctcacttccggATCGGGCCAATAACGCTGACGCTGCCAAGGGTACGTAGGAAGAGGCACGCGGCGACCGGCAGTTGGGAACACACCAGGCCAGGATACGGAACCCCCTGCTGCCCACAAGCGGCCAAGCGCTTCCAACACTCCTGCTGCTTCTTCACGTCCGGCGCGCAGCGATGCTAACAAGGT	CGGTTCTGCTTCCGGTAAGCACG	ggctttccggtgcggatccaatgcaccagaaaaccgccttccagatccaccggcgtggtggccagcgggcgccaatcaacacgatagcgggagtcagccagttgatcgctcacttccggATCGGGCCAATAACGCTGACGCTGCCAAGGGTACGTAGGAAGAGGCACGCGGCGACCGGCAGTTGGGAACACACCAGGCCAGGATACGGAACCCCCTGCTGCCCACAAGCGGCCAAGCGCTTCCAACACTCCTGCTGCTTCTTCACGTCCGGCGCGCAGCGATGCTAACAAGGTCGGTTCTGCTTCCGGTAAGCACG	316	ggctttccggtgcggatccaatgcaccagaaaaccgccttccagatccaccggcgtggtggccagcgggcgccaatcaacacgatagcgggagtcagccagttgatcgctcacttccggATCGGGCCAATAACGCTGACGCTGCCAAGGGTACGTAGGAAGAGGCACGCGGCGACCGGCAGTTGGGAACACACCAGGCCAGGATACGGAACCCCCTGCTGCCCACAAGCGGCCAAGCGCTTCCAACACTCCTGCTGCTTCTTCACGTCCGGCGCGCAGCGATGCTAACAAGGTCGGTTCTGCTTCCGGTAAGCACG
ds58	R60	ggctttccggtgcggatcca	atgcaccagaaaaccgccttccagatccaccggcgtggtggccagcgggcgccaatcaacacgatagcgggagtcagccagttgatcgctcacttcAATATCGGGCCAATAACGCTGACGCTGCCAAGGGTACGTAGGAAGAGGCACGCGGCGACCGGCAGTTGGGAACACACCAGGCCAGGATACGGAACCCCCTGCTGCCCACAAGCGGCCAAGCGCTTCCAACACTCCTGCTGCTTCTTCACGTCCGGCGCGCAGCGATGCTAACAAGGT	CGGTTCTGCTTCCGGTAAGCACG	ggctttccggtgcggatccaatgcaccagaaaaccgccttccagatccaccggcgtggtggccagcgggcgccaatcaacacgatagcgggagtcagccagttgatcgctcacttcAATATCGGGCCAATAACGCTGACGCTGCCAAGGGTACGTAGGAAGAGGCACGCGGCGACCGGCAGTTGGGAACACACCAGGCCAGGATACGGAACCCCCTGCTGCCCACAAGCGGCCAAGCGCTTCCAACACTCCTGCTGCTTCTTCACGTCCGGCGCGCAGCGATGCTAACAAGGTCGGTTCTGCTTCCGGTAAGCACG	316	ggctttccggtgcggatccaatgcaccagaaaaccgccttccagatccaccggcgtggtggccagcgggcgccaatcaacacgatagcgggagtcagccagttgatcgctcacttcAATATCGGGCCAATAACGCTGACGCTGCCAAGGGTACGTAGGAAGAGGCACGCGGCGACCGGCAGTTGGGAACACACCAGGCCAGGATACGGAACCCCCTGCTGCCCACAAGCGGCCAAGCGCTTCCAACACTCCTGCTGCTTCTTCACGTCCGGCGCGCAGCGATGCTAACAAGGTCGGTTCTGCTTCCGGTAAGCACG
ds59	R61	ggctttccggtgcggatcca	atgcaccagaaaaccgccttccagatccaccggcgtggtggccagcgggcgccaatcaacacgatagcgggagtcagccagttgatcgctcacCTCAATATCGGGCCAATAACGCTGACGCTGCCAAGGGTACGTAGGAAGAGGCACGCGGCGACCGGCAGTTGGGAACACACCAGGCCAGGATACGGAACCCCCTGCTGCCCACAAGCGGCCAAGCGCTTCCAACACTCCTGCTGCTTCTTCACGTCCGGCGCGCAGCGATGCTAACAAGGT	CGGTTCTGCTTCCGGTAAGCACG	ggctttccggtgcggatccaatgcaccagaaaaccgccttccagatccaccggcgtggtggccagcgggcgccaatcaacacgatagcgggagtcagccagttgatcgctcacCTCAATATCGGGCCAATAACGCTGACGCTGCCAAGGGTACGTAGGAAGAGGCACGCGGCGACCGGCAGTTGGGAACACACCAGGCCAGGATACGGAACCCCCTGCTGCCCACAAGCGGCCAAGCGCTTCCAACACTCCTGCTGCTTCTTCACGTCCGGCGCGCAGCGATGCTAACAAGGTCGGTTCTGCTTCCGGTAAGCACG	316	ggctttccggtgcggatccaatgcaccagaaaaccgccttccagatccaccggcgtggtggccagcgggcgccaatcaacacgatagcgggagtcagccagttgatcgctcacCTCAATATCGGGCCAATAACGCTGACGCTGCCAAGGGTACGTAGGAAGAGGCACGCGGCGACCGGCAGTTGGGAACACACCAGGCCAGGATACGGAACCCCCTGCTGCCCACAAGCGGCCAAGCGCTTCCAACACTCCTGCTGCTTCTTCACGTCCGGCGCGCAGCGATGCTAACAAGGTCGGTTCTGCTTCCGGTAAGCACG
ds60	R62	ggctttccggtgcggatcca	atgcaccagaaaaccgccttccagatccaccggcgtggtggccagcgggcgccaatcaacacgatagcgggagtcagccagttgatcgctAGGCTCAATATCGGGCCAATAACGCTGACGCTGCCAAGGGTACGTAGGAAGAGGCACGCGGCGACCGGCAGTTGGGAACACACCAGGCCAGGATACGGAACCCCCTGCTGCCCACAAGCGGCCAAGCGCTTCCAACACTCCTGCTGCTTCTTCACGTCCGGCGCGCAGCGATGCTAACAAGGT	CGGTTCTGCTTCCGGTAAGCACG	ggctttccggtgcggatccaatgcaccagaaaaccgccttccagatccaccggcgtggtggccagcgggcgccaatcaacacgatagcgggagtcagccagttgatcgctAGGCTCAATATCGGGCCAATAACGCTGACGCTGCCAAGGGTACGTAGGAAGAGGCACGCGGCGACCGGCAGTTGGGAACACACCAGGCCAGGATACGGAACCCCCTGCTGCCCACAAGCGGCCAAGCGCTTCCAACACTCCTGCTGCTTCTTCACGTCCGGCGCGCAGCGATGCTAACAAGGTCGGTTCTGCTTCCGGTAAGCACG	316	ggctttccggtgcggatccaatgcaccagaaaaccgccttccagatccaccggcgtggtggccagcgggcgccaatcaacacgatagcgggagtcagccagttgatcgctAGGCTCAATATCGGGCCAATAACGCTGACGCTGCCAAGGGTACGTAGGAAGAGGCACGCGGCGACCGGCAGTTGGGAACACACCAGGCCAGGATACGGAACCCCCTGCTGCCCACAAGCGGCCAAGCGCTTCCAACACTCCTGCTGCTTCTTCACGTCCGGCGCGCAGCGATGCTAACAAGGTCGGTTCTGCTTCCGGTAAGCACG
ds61	R63	ggctttccggtgcggatcca	atgcaccagaaaaccgccttccagatccaccggcgtggtggccagcgggcgccaatcaacacgatagcgggagtcagccagttgatcGTCAGGCTCAATATCGGGCCAATAACGCTGACGCTGCCAAGGGTACGTAGGAAGAGGCACGCGGCGACCGGCAGTTGGGAACACACCAGGCCAGGATACGGAACCCCCTGCTGCCCACAAGCGGCCAAGCGCTTCCAACACTCCTGCTGCTTCTTCACGTCCGGCGCGCAGCGATGCTAACAAGGT	CGGTTCTGCTTCCGGTAAGCACG	ggctttccggtgcggatccaatgcaccagaaaaccgccttccagatccaccggcgtggtggccagcgggcgccaatcaacacgatagcgggagtcagccagttgatcGTCAGGCTCAATATCGGGCCAATAACGCTGACGCTGCCAAGGGTACGTAGGAAGAGGCACGCGGCGACCGGCAGTTGGGAACACACCAGGCCAGGATACGGAACCCCCTGCTGCCCACAAGCGGCCAAGCGCTTCCAACACTCCTGCTGCTTCTTCACGTCCGGCGCGCAGCGATGCTAACAAGGTCGGTTCTGCTTCCGGTAAGCACG	316	ggctttccggtgcggatccaatgcaccagaaaaccgccttccagatccaccggcgtggtggccagcgggcgccaatcaacacgatagcgggagtcagccagttgatcGTCAGGCTCAATATCGGGCCAATAACGCTGACGCTGCCAAGGGTACGTAGGAAGAGGCACGCGGCGACCGGCAGTTGGGAACACACCAGGCCAGGATACGGAACCCCCTGCTGCCCACAAGCGGCCAAGCGCTTCCAACACTCCTGCTGCTTCTTCACGTCCGGCGCGCAGCGATGCTAACAAGGTCGGTTCTGCTTCCGGTAAGCACG
ds62a	R64	ggctttccggtgcggatcca	atgcaccagaaaaccgccttccagatccaccggcgtggtggccagcgggcgccaatcaacacgatagcgggagtcagccagttgTGAGTCAGGCTCAATATCGGGCCAATAACGCTGACGCTGCCAAGGGTACGTAGGAAGAGGCACGCGGCGACCGGCAGTTGGGAACACACCAGGCCAGGATACGGAACCCCCTGCTGCCCACAAGCGGCCAAGCGCTTCCAACACTCCTGCTGCTTCTTCACGTCCGGCGCGCAGCGATGCTAACAAGGT	CGGTTCTGCTTCCGGTAAGCACG	ggctttccggtgcggatccaatgcaccagaaaaccgccttccagatccaccggcgtggtggccagcgggcgccaatcaacacgatagcgggagtcagccagttgTGAGTCAGGCTCAATATCGGGCCAATAACGCTGACGCTGCCAAGGGTACGTAGGAAGAGGCACGCGGCGACCGGCAGTTGGGAACACACCAGGCCAGGATACGGAACCCCCTGCTGCCCACAAGCGGCCAAGCGCTTCCAACACTCCTGCTGCTTCTTCACGTCCGGCGCGCAGCGATGCTAACAAGGTCGGTTCTGCTTCCGGTAAGCACG	316	ggctttccggtgcggatccaatgcaccagaaaaccgccttccagatccaccggcgtggtggccagcgggcgccaatcaacacgatagcgggagtcagccagttgTGAGTCAGGCTCAATATCGGGCCAATAACGCTGACGCTGCCAAGGGTACGTAGGAAGAGGCACGCGGCGACCGGCAGTTGGGAACACACCAGGCCAGGATACGGAACCCCCTGCTGCCCACAAGCGGCCAAGCGCTTCCAACACTCCTGCTGCTTCTTCACGTCCGGCGCGCAGCGATGCTAACAAGGTCGGTTCTGCTTCCGGTAAGCACG
ds62b	R65	ggctttccggtgcggatcca	atgcaccagaaaaccgccttccagatccaccggcgtggtggccagcgggcgccaatcaacacgatagcgggagtcagccagttgACGTGAGTCAGGCTCAATATCGGGCCAATAACGCTGACGCTGCCAAGGGTACGTAGGAAGAGGCACGCGGCGACCGGCAGTTGGGAACACACCAGGCCAGGATACGGAACCCCCTGCTGCCCACAAGCGGCCAAGCGCTTCCAACACTCCTGCTGCTTCTTCACGTCCGGCGCGCAGCGATGCTAACAAGGT	CGGTTCTGCTTCCGGTAAGCACG	ggctttccggtgcggatccaatgcaccagaaaaccgccttccagatccaccggcgtggtggccagcgggcgccaatcaacacgatagcgggagtcagccagttgACGTGAGTCAGGCTCAATATCGGGCCAATAACGCTGACGCTGCCAAGGGTACGTAGGAAGAGGCACGCGGCGACCGGCAGTTGGGAACACACCAGGCCAGGATACGGAACCCCCTGCTGCCCACAAGCGGCCAAGCGCTTCCAACACTCCTGCTGCTTCTTCACGTCCGGCGCGCAGCGATGCTAACAAGGTCGGTTCTGCTTCCGGTAAGCACG	319	ggctttccggtgcggatccaatgcaccagaaaaccgccttccagatccaccggcgtggtggccagcgggcgccaatcaacacgatagcgggagtcagccagttgACGTGAGTCAGGCTCAATATCGGGCCAATAACGCTGACGCTGCCAAGGGTACGTAGGAAGAGGCACGCGGCGACCGGCAGTTGGGAACACACCAGGCCAGGATACGGAACCCCCTGCTGCCCACAAGCGGCCAAGCGCTTCCAACACTCCTGCTGCTTCTTCACGTCCGGCGCGCAGCGATGCTAACAAGGTCGGTTCTGCTTCCGGTAAGCACG
ds62c	R66	ggctttccggtgcggatcca	atgcaccagaaaaccgccttccagatccaccggcgtggtggccagcgggcgccaatcaacacgatagcgggagtcagccagttgACGACGTGAGTCAGGCTCAATATCGGGCCAATAACGCTGACGCTGCCAAGGGTACGTAGGAAGAGGCACGCGGCGACCGGCAGTTGGGAACACACCAGGCCAGGATACGGAACCCCCTGCTGCCCACAAGCGGCCAAGCGCTTCCAACACTCCTGCTGCTTCTTCACGTCCGGCGCGCAGCGATGCTAACAAGGT	CGGTTCTGCTTCCGGTAAGCACG	ggctttccggtgcggatccaatgcaccagaaaaccgccttccagatccaccggcgtggtggccagcgggcgccaatcaacacgatagcgggagtcagccagttgACGACGTGAGTCAGGCTCAATATCGGGCCAATAACGCTGACGCTGCCAAGGGTACGTAGGAAGAGGCACGCGGCGACCGGCAGTTGGGAACACACCAGGCCAGGATACGGAACCCCCTGCTGCCCACAAGCGGCCAAGCGCTTCCAACACTCCTGCTGCTTCTTCACGTCCGGCGCGCAGCGATGCTAACAAGGTCGGTTCTGCTTCCGGTAAGCACG	322	ggctttccggtgcggatccaatgcaccagaaaaccgccttccagatccaccggcgtggtggccagcgggcgccaatcaacacgatagcgggagtcagccagttgACGACGTGAGTCAGGCTCAATATCGGGCCAATAACGCTGACGCTGCCAAGGGTACGTAGGAAGAGGCACGCGGCGACCGGCAGTTGGGAACACACCAGGCCAGGATACGGAACCCCCTGCTGCCCACAAGCGGCCAAGCGCTTCCAACACTCCTGCTGCTTCTTCACGTCCGGCGCGCAGCGATGCTAACAAGGTCGGTTCTGCTTCCGGTAAGCACG
ds62d	R67	ggctttccggtgcggatcca	atgcaccagaaaaccgccttccagatccaccggcgtggtggccagcgggcgccaatcaacacgatagcgggagtcagccagttgGTGACGACGTGAGTCAGGCTCAATATCGGGCCAATAACGCTGACGCTGCCAAGGGTACGTAGGAAGAGGCACGCGGCGACCGGCAGTTGGGAACACACCAGGCCAGGATACGGAACCCCCTGCTGCCCACAAGCGGCCAAGCGCTTCCAACACTCCTGCTGCTTCTTCACGTCCGGCGCGCAGCGATGCTAACAAGGT	CGGTTCTGCTTCCGGTAAGCACG	ggctttccggtgcggatccaatgcaccagaaaaccgccttccagatccaccggcgtggtggccagcgggcgccaatcaacacgatagcgggagtcagccagttgGTGACGACGTGAGTCAGGCTCAATATCGGGCCAATAACGCTGACGCTGCCAAGGGTACGTAGGAAGAGGCACGCGGCGACCGGCAGTTGGGAACACACCAGGCCAGGATACGGAACCCCCTGCTGCCCACAAGCGGCCAAGCGCTTCCAACACTCCTGCTGCTTCTTCACGTCCGGCGCGCAGCGATGCTAACAAGGTCGGTTCTGCTTCCGGTAAGCACG	325	ggctttccggtgcggatccaatgcaccagaaaaccgccttccagatccaccggcgtggtggccagcgggcgccaatcaacacgatagcgggagtcagccagttgGTGACGACGTGAGTCAGGCTCAATATCGGGCCAATAACGCTGACGCTGCCAAGGGTACGTAGGAAGAGGCACGCGGCGACCGGCAGTTGGGAACACACCAGGCCAGGATACGGAACCCCCTGCTGCCCACAAGCGGCCAAGCGCTTCCAACACTCCTGCTGCTTCTTCACGTCCGGCGCGCAGCGATGCTAACAAGGTCGGTTCTGCTTCCGGTAAGCACG
ds62e	R68	ggctttccggtgcggatcca	atgcaccagaaaaccgccttccagatccaccggcgtggtggccagcgggcgccaatcaacacgatagcgggagtcagccagttgTGCGTGACGACGTGAGTCAGGCTCAATATCGGGCCAATAACGCTGACGCTGCCAAGGGTACGTAGGAAGAGGCACGCGGCGACCGGCAGTTGGGAACACACCAGGCCAGGATACGGAACCCCCTGCTGCCCACAAGCGGCCAAGCGCTTCCAACACTCCTGCTGCTTCTTCACGTCCGGCGCGCAGCGATGCTAACAAGGT	CGGTTCTGCTTCCGGTAAGCACG	ggctttccggtgcggatccaatgcaccagaaaaccgccttccagatccaccggcgtggtggccagcgggcgccaatcaacacgatagcgggagtcagccagttgTGCGTGACGACGTGAGTCAGGCTCAATATCGGGCCAATAACGCTGACGCTGCCAAGGGTACGTAGGAAGAGGCACGCGGCGACCGGCAGTTGGGAACACACCAGGCCAGGATACGGAACCCCCTGCTGCCCACAAGCGGCCAAGCGCTTCCAACACTCCTGCTGCTTCTTCACGTCCGGCGCGCAGCGATGCTAACAAGGTCGGTTCTGCTTCCGGTAAGCACG	328	ggctttccggtgcggatccaatgcaccagaaaaccgccttccagatccaccggcgtggtggccagcgggcgccaatcaacacgatagcgggagtcagccagttgTGCGTGACGACGTGAGTCAGGCTCAATATCGGGCCAATAACGCTGACGCTGCCAAGGGTACGTAGGAAGAGGCACGCGGCGACCGGCAGTTGGGAACACACCAGGCCAGGATACGGAACCCCCTGCTGCCCACAAGCGGCCAAGCGCTTCCAACACTCCTGCTGCTTCTTCACGTCCGGCGCGCAGCGATGCTAACAAGGTCGGTTCTGCTTCCGGTAAGCACG
ds62f	R69	ggctttccggtgcggatcca	atgcaccagaaaaccgccttccagatccaccggcgtggtggccagcgggcgccaatcaacacgatagcgggagtcagccagttgGGCTGCGTGACGACGTGAGTCAGGCTCAATATCGGGCCAATAACGCTGACGCTGCCAAGGGTACGTAGGAAGAGGCACGCGGCGACCGGCAGTTGGGAACACACCAGGCCAGGATACGGAACCCCCTGCTGCCCACAAGCGGCCAAGCGCTTCCAACACTCCTGCTGCTTCTTCACGTCCGGCGCGCAGCGATGCTAACAAGGT	CGGTTCTGCTTCCGGTAAGCACG	ggctttccggtgcggatccaatgcaccagaaaaccgccttccagatccaccggcgtggtggccagcgggcgccaatcaacacgatagcgggagtcagccagttgGGCTGCGTGACGACGTGAGTCAGGCTCAATATCGGGCCAATAACGCTGACGCTGCCAAGGGTACGTAGGAAGAGGCACGCGGCGACCGGCAGTTGGGAACACACCAGGCCAGGATACGGAACCCCCTGCTGCCCACAAGCGGCCAAGCGCTTCCAACACTCCTGCTGCTTCTTCACGTCCGGCGCGCAGCGATGCTAACAAGGTCGGTTCTGCTTCCGGTAAGCACG	331	ggctttccggtgcggatccaatgcaccagaaaaccgccttccagatccaccggcgtggtggccagcgggcgccaatcaacacgatagcgggagtcagccagttgGGCTGCGTGACGACGTGAGTCAGGCTCAATATCGGGCCAATAACGCTGACGCTGCCAAGGGTACGTAGGAAGAGGCACGCGGCGACCGGCAGTTGGGAACACACCAGGCCAGGATACGGAACCCCCTGCTGCCCACAAGCGGCCAAGCGCTTCCAACACTCCTGCTGCTTCTTCACGTCCGGCGCGCAGCGATGCTAACAAGGTCGGTTCTGCTTCCGGTAAGCACG
ds62g	R70	ggctttccggtgcggatcca	atgcaccagaaaaccgccttccagatccaccggcgtggtggccagcgggcgccaatcaacacgatagcgggagtcagccagttgGGCGGCTGCGTGACGACGTGAGTCAGGCTCAATATCGGGCCAATAACGCTGACGCTGCCAAGGGTACGTAGGAAGAGGCACGCGGCGACCGGCAGTTGGGAACACACCAGGCCAGGATACGGAACCCCCTGCTGCCCACAAGCGGCCAAGCGCTTCCAACACTCCTGCTGCTTCTTCACGTCCGGCGCGCAGCGATGCTAACAAGGT	CGGTTCTGCTTCCGGTAAGCACG	ggctttccggtgcggatccaatgcaccagaaaaccgccttccagatccaccggcgtggtggccagcgggcgccaatcaacacgatagcgggagtcagccagttgGGCGGCTGCGTGACGACGTGAGTCAGGCTCAATATCGGGCCAATAACGCTGACGCTGCCAAGGGTACGTAGGAAGAGGCACGCGGCGACCGGCAGTTGGGAACACACCAGGCCAGGATACGGAACCCCCTGCTGCCCACAAGCGGCCAAGCGCTTCCAACACTCCTGCTGCTTCTTCACGTCCGGCGCGCAGCGATGCTAACAAGGTCGGTTCTGCTTCCGGTAAGCACG	334	ggctttccggtgcggatccaatgcaccagaaaaccgccttccagatccaccggcgtggtggccagcgggcgccaatcaacacgatagcgggagtcagccagttgGGCGGCTGCGTGACGACGTGAGTCAGGCTCAATATCGGGCCAATAACGCTGACGCTGCCAAGGGTACGTAGGAAGAGGCACGCGGCGACCGGCAGTTGGGAACACACCAGGCCAGGATACGGAACCCCCTGCTGCCCACAAGCGGCCAAGCGCTTCCAACACTCCTGCTGCTTCTTCACGTCCGGCGCGCAGCGATGCTAACAAGGTCGGTTCTGCTTCCGGTAAGCACG
ds62h	R71	ggctttccggtgcggatcca	atgcaccagaaaaccgccttccagatccaccggcgtggtggccagcgggcgccaatcaacacgatagcgggagtcagccagttgATCGGCGGCTGCGTGACGACGTGAGTCAGGCTCAATATCGGGCCAATAACGCTGACGCTGCCAAGGGTACGTAGGAAGAGGCACGCGGCGACCGGCAGTTGGGAACACACCAGGCCAGGATACGGAACCCCCTGCTGCCCACAAGCGGCCAAGCGCTTCCAACACTCCTGCTGCTTCTTCACGTCCGGCGCGCAGCGATGCTAACAAGGT	CGGTTCTGCTTCCGGTAAGCACG	ggctttccggtgcggatccaatgcaccagaaaaccgccttccagatccaccggcgtggtggccagcgggcgccaatcaacacgatagcgggagtcagccagttgATCGGCGGCTGCGTGACGACGTGAGTCAGGCTCAATATCGGGCCAATAACGCTGACGCTGCCAAGGGTACGTAGGAAGAGGCACGCGGCGACCGGCAGTTGGGAACACACCAGGCCAGGATACGGAACCCCCTGCTGCCCACAAGCGGCCAAGCGCTTCCAACACTCCTGCTGCTTCTTCACGTCCGGCGCGCAGCGATGCTAACAAGGTCGGTTCTGCTTCCGGTAAGCACG	337	ggctttccggtgcggatccaatgcaccagaaaaccgccttccagatccaccggcgtggtggccagcgggcgccaatcaacacgatagcgggagtcagccagttgATCGGCGGCTGCGTGACGACGTGAGTCAGGCTCAATATCGGGCCAATAACGCTGACGCTGCCAAGGGTACGTAGGAAGAGGCACGCGGCGACCGGCAGTTGGGAACACACCAGGCCAGGATACGGAACCCCCTGCTGCCCACAAGCGGCCAAGCGCTTCCAACACTCCTGCTGCTTCTTCACGTCCGGCGCGCAGCGATGCTAACAAGGTCGGTTCTGCTTCCGGTAAGCACG
ds63	R72	ggctttccggtgcggatcca	atgcaccagaaaaccgccttccagatccaccggcgtggtggccagcgggcgccaatcaacacgatagcgggagtcagccagTGGATCGGCGGCTGCGTGACGACGTGAGTCAGGCTCAATATCGGGCCAATAACGCTGACGCTGCCAAGGGTACGTAGGAAGAGGCACGCGGCGACCGGCAGTTGGGAACACACCAGGCCAGGATACGGAACCCCCTGCTGCCCACAAGCGGCCAAGCGCTTCCAACACTCCTGCTGCTTCTTCACGTCCGGCGCGCAGCGATGCTAACAAGGT	CGGTTCTGCTTCCGGTAAGCACG	ggctttccggtgcggatccaatgcaccagaaaaccgccttccagatccaccggcgtggtggccagcgggcgccaatcaacacgatagcgggagtcagccagTGGATCGGCGGCTGCGTGACGACGTGAGTCAGGCTCAATATCGGGCCAATAACGCTGACGCTGCCAAGGGTACGTAGGAAGAGGCACGCGGCGACCGGCAGTTGGGAACACACCAGGCCAGGATACGGAACCCCCTGCTGCCCACAAGCGGCCAAGCGCTTCCAACACTCCTGCTGCTTCTTCACGTCCGGCGCGCAGCGATGCTAACAAGGTCGGTTCTGCTTCCGGTAAGCACG	337	ggctttccggtgcggatccaatgcaccagaaaaccgccttccagatccaccggcgtggtggccagcgggcgccaatcaacacgatagcgggagtcagccagTGGATCGGCGGCTGCGTGACGACGTGAGTCAGGCTCAATATCGGGCCAATAACGCTGACGCTGCCAAGGGTACGTAGGAAGAGGCACGCGGCGACCGGCAGTTGGGAACACACCAGGCCAGGATACGGAACCCCCTGCTGCCCACAAGCGGCCAAGCGCTTCCAACACTCCTGCTGCTTCTTCACGTCCGGCGCGCAGCGATGCTAACAAGGTCGGTTCTGCTTCCGGTAAGCACG
ds64	R73	ggctttccggtgcggatcca	atgcaccagaaaaccgccttccagatccaccggcgtggtggccagcgggcgccaatcaacacgatagcgggagtcagcGGTTGGATCGGCGGCTGCGTGACGACGTGAGTCAGGCTCAATATCGGGCCAATAACGCTGACGCTGCCAAGGGTACGTAGGAAGAGGCACGCGGCGACCGGCAGTTGGGAACACACCAGGCCAGGATACGGAACCCCCTGCTGCCCACAAGCGGCCAAGCGCTTCCAACACTCCTGCTGCTTCTTCACGTCCGGCGCGCAGCGATGCTAACAAGGT	CGGTTCTGCTTCCGGTAAGCACG	ggctttccggtgcggatccaatgcaccagaaaaccgccttccagatccaccggcgtggtggccagcgggcgccaatcaacacgatagcgggagtcagcGGTTGGATCGGCGGCTGCGTGACGACGTGAGTCAGGCTCAATATCGGGCCAATAACGCTGACGCTGCCAAGGGTACGTAGGAAGAGGCACGCGGCGACCGGCAGTTGGGAACACACCAGGCCAGGATACGGAACCCCCTGCTGCCCACAAGCGGCCAAGCGCTTCCAACACTCCTGCTGCTTCTTCACGTCCGGCGCGCAGCGATGCTAACAAGGTCGGTTCTGCTTCCGGTAAGCACG	337	ggctttccggtgcggatccaatgcaccagaaaaccgccttccagatccaccggcgtggtggccagcgggcgccaatcaacacgatagcgggagtcagcGGTTGGATCGGCGGCTGCGTGACGACGTGAGTCAGGCTCAATATCGGGCCAATAACGCTGACGCTGCCAAGGGTACGTAGGAAGAGGCACGCGGCGACCGGCAGTTGGGAACACACCAGGCCAGGATACGGAACCCCCTGCTGCCCACAAGCGGCCAAGCGCTTCCAACACTCCTGCTGCTTCTTCACGTCCGGCGCGCAGCGATGCTAACAAGGTCGGTTCTGCTTCCGGTAAGCACG
ds65	R74	ggctttccggtgcggatcca	atgcaccagaaaaccgccttccagatccaccggcgtggtggccagcgggcgccaatcaacacgatagcgggagtcCTGGGTTGGATCGGCGGCTGCGTGACGACGTGAGTCAGGCTCAATATCGGGCCAATAACGCTGACGCTGCCAAGGGTACGTAGGAAGAGGCACGCGGCGACCGGCAGTTGGGAACACACCAGGCCAGGATACGGAACCCCCTGCTGCCCACAAGCGGCCAAGCGCTTCCAACACTCCTGCTGCTTCTTCACGTCCGGCGCGCAGCGATGCTAACAAGGT	CGGTTCTGCTTCCGGTAAGCACG	ggctttccggtgcggatccaatgcaccagaaaaccgccttccagatccaccggcgtggtggccagcgggcgccaatcaacacgatagcgggagtcCTGGGTTGGATCGGCGGCTGCGTGACGACGTGAGTCAGGCTCAATATCGGGCCAATAACGCTGACGCTGCCAAGGGTACGTAGGAAGAGGCACGCGGCGACCGGCAGTTGGGAACACACCAGGCCAGGATACGGAACCCCCTGCTGCCCACAAGCGGCCAAGCGCTTCCAACACTCCTGCTGCTTCTTCACGTCCGGCGCGCAGCGATGCTAACAAGGTCGGTTCTGCTTCCGGTAAGCACG	337	ggctttccggtgcggatccaatgcaccagaaaaccgccttccagatccaccggcgtggtggccagcgggcgccaatcaacacgatagcgggagtcCTGGGTTGGATCGGCGGCTGCGTGACGACGTGAGTCAGGCTCAATATCGGGCCAATAACGCTGACGCTGCCAAGGGTACGTAGGAAGAGGCACGCGGCGACCGGCAGTTGGGAACACACCAGGCCAGGATACGGAACCCCCTGCTGCCCACAAGCGGCCAAGCGCTTCCAACACTCCTGCTGCTTCTTCACGTCCGGCGCGCAGCGATGCTAACAAGGTCGGTTCTGCTTCCGGTAAGCACG
ds66	R75	ggctttccggtgcggatcca	atgcaccagaaaaccgccttccagatccaccggcgtggtggccagcgggcgccaatcaacacgatagcgggaCCCCTGGGTTGGATCGGCGGCTGCGTGACGACGTGAGTCAGGCTCAATATCGGGCCAATAACGCTGACGCTGCCAAGGGTACGTAGGAAGAGGCACGCGGCGACCGGCAGTTGGGAACACACCAGGCCAGGATACGGAACCCCCTGCTGCCCACAAGCGGCCAAGCGCTTCCAACACTCCTGCTGCTTCTTCACGTCCGGCGCGCAGCGATGCTAACAAGGT	CGGTTCTGCTTCCGGTAAGCACG	ggctttccggtgcggatccaatgcaccagaaaaccgccttccagatccaccggcgtggtggccagcgggcgccaatcaacacgatagcgggaCCCCTGGGTTGGATCGGCGGCTGCGTGACGACGTGAGTCAGGCTCAATATCGGGCCAATAACGCTGACGCTGCCAAGGGTACGTAGGAAGAGGCACGCGGCGACCGGCAGTTGGGAACACACCAGGCCAGGATACGGAACCCCCTGCTGCCCACAAGCGGCCAAGCGCTTCCAACACTCCTGCTGCTTCTTCACGTCCGGCGCGCAGCGATGCTAACAAGGTCGGTTCTGCTTCCGGTAAGCACG	337	ggctttccggtgcggatccaatgcaccagaaaaccgccttccagatccaccggcgtggtggccagcgggcgccaatcaacacgatagcgggaCCCCTGGGTTGGATCGGCGGCTGCGTGACGACGTGAGTCAGGCTCAATATCGGGCCAATAACGCTGACGCTGCCAAGGGTACGTAGGAAGAGGCACGCGGCGACCGGCAGTTGGGAACACACCAGGCCAGGATACGGAACCCCCTGCTGCCCACAAGCGGCCAAGCGCTTCCAACACTCCTGCTGCTTCTTCACGTCCGGCGCGCAGCGATGCTAACAAGGTCGGTTCTGCTTCCGGTAAGCACG
ds67	R76	ggctttccggtgcggatcca	atgcaccagaaaaccgccttccagatccaccggcgtggtggccagcgggcgccaatcaacacgatagcgCCACCCCTGGGTTGGATCGGCGGCTGCGTGACGACGTGAGTCAGGCTCAATATCGGGCCAATAACGCTGACGCTGCCAAGGGTACGTAGGAAGAGGCACGCGGCGACCGGCAGTTGGGAACACACCAGGCCAGGATACGGAACCCCCTGCTGCCCACAAGCGGCCAAGCGCTTCCAACACTCCTGCTGCTTCTTCACGTCCGGCGCGCAGCGATGCTAACAAGGT	CGGTTCTGCTTCCGGTAAGCACG	ggctttccggtgcggatccaatgcaccagaaaaccgccttccagatccaccggcgtggtggccagcgggcgccaatcaacacgatagcgCCACCCCTGGGTTGGATCGGCGGCTGCGTGACGACGTGAGTCAGGCTCAATATCGGGCCAATAACGCTGACGCTGCCAAGGGTACGTAGGAAGAGGCACGCGGCGACCGGCAGTTGGGAACACACCAGGCCAGGATACGGAACCCCCTGCTGCCCACAAGCGGCCAAGCGCTTCCAACACTCCTGCTGCTTCTTCACGTCCGGCGCGCAGCGATGCTAACAAGGTCGGTTCTGCTTCCGGTAAGCACG	337	ggctttccggtgcggatccaatgcaccagaaaaccgccttccagatccaccggcgtggtggccagcgggcgccaatcaacacgatagcgCCACCCCTGGGTTGGATCGGCGGCTGCGTGACGACGTGAGTCAGGCTCAATATCGGGCCAATAACGCTGACGCTGCCAAGGGTACGTAGGAAGAGGCACGCGGCGACCGGCAGTTGGGAACACACCAGGCCAGGATACGGAACCCCCTGCTGCCCACAAGCGGCCAAGCGCTTCCAACACTCCTGCTGCTTCTTCACGTCCGGCGCGCAGCGATGCTAACAAGGTCGGTTCTGCTTCCGGTAAGCACG
ds68	R77	ggctttccggtgcggatcca	atgcaccagaaaaccgccttccagatccaccggcgtggtggccagcgggcgccaatcaacacgataGAACCACCCCTGGGTTGGATCGGCGGCTGCGTGACGACGTGAGTCAGGCTCAATATCGGGCCAATAACGCTGACGCTGCCAAGGGTACGTAGGAAGAGGCACGCGGCGACCGGCAGTTGGGAACACACCAGGCCAGGATACGGAACCCCCTGCTGCCCACAAGCGGCCAAGCGCTTCCAACACTCCTGCTGCTTCTTCACGTCCGGCGCGCAGCGATGCTAACAAGGT	CGGTTCTGCTTCCGGTAAGCACG	ggctttccggtgcggatccaatgcaccagaaaaccgccttccagatccaccggcgtggtggccagcgggcgccaatcaacacgataGAACCACCCCTGGGTTGGATCGGCGGCTGCGTGACGACGTGAGTCAGGCTCAATATCGGGCCAATAACGCTGACGCTGCCAAGGGTACGTAGGAAGAGGCACGCGGCGACCGGCAGTTGGGAACACACCAGGCCAGGATACGGAACCCCCTGCTGCCCACAAGCGGCCAAGCGCTTCCAACACTCCTGCTGCTTCTTCACGTCCGGCGCGCAGCGATGCTAACAAGGTCGGTTCTGCTTCCGGTAAGCACG	337	ggctttccggtgcggatccaatgcaccagaaaaccgccttccagatccaccggcgtggtggccagcgggcgccaatcaacacgataGAACCACCCCTGGGTTGGATCGGCGGCTGCGTGACGACGTGAGTCAGGCTCAATATCGGGCCAATAACGCTGACGCTGCCAAGGGTACGTAGGAAGAGGCACGCGGCGACCGGCAGTTGGGAACACACCAGGCCAGGATACGGAACCCCCTGCTGCCCACAAGCGGCCAAGCGCTTCCAACACTCCTGCTGCTTCTTCACGTCCGGCGCGCAGCGATGCTAACAAGGTCGGTTCTGCTTCCGGTAAGCACG
ds69	R78	ggctttccggtgcggatcca	atgcaccagaaaaccgccttccagatccaccggcgtggtggccagcgggcgccaatcaacacgGTAGAACCACCCCTGGGTTGGATCGGCGGCTGCGTGACGACGTGAGTCAGGCTCAATATCGGGCCAATAACGCTGACGCTGCCAAGGGTACGTAGGAAGAGGCACGCGGCGACCGGCAGTTGGGAACACACCAGGCCAGGATACGGAACCCCCTGCTGCCCACAAGCGGCCAAGCGCTTCCAACACTCCTGCTGCTTCTTCACGTCCGGCGCGCAGCGATGCTAACAAGGT	CGGTTCTGCTTCCGGTAAGCACG	ggctttccggtgcggatccaatgcaccagaaaaccgccttccagatccaccggcgtggtggccagcgggcgccaatcaacacgGTAGAACCACCCCTGGGTTGGATCGGCGGCTGCGTGACGACGTGAGTCAGGCTCAATATCGGGCCAATAACGCTGACGCTGCCAAGGGTACGTAGGAAGAGGCACGCGGCGACCGGCAGTTGGGAACACACCAGGCCAGGATACGGAACCCCCTGCTGCCCACAAGCGGCCAAGCGCTTCCAACACTCCTGCTGCTTCTTCACGTCCGGCGCGCAGCGATGCTAACAAGGTCGGTTCTGCTTCCGGTAAGCACG	337	ggctttccggtgcggatccaatgcaccagaaaaccgccttccagatccaccggcgtggtggccagcgggcgccaatcaacacgGTAGAACCACCCCTGGGTTGGATCGGCGGCTGCGTGACGACGTGAGTCAGGCTCAATATCGGGCCAATAACGCTGACGCTGCCAAGGGTACGTAGGAAGAGGCACGCGGCGACCGGCAGTTGGGAACACACCAGGCCAGGATACGGAACCCCCTGCTGCCCACAAGCGGCCAAGCGCTTCCAACACTCCTGCTGCTTCTTCACGTCCGGCGCGCAGCGATGCTAACAAGGTCGGTTCTGCTTCCGGTAAGCACG
ds70	R79	ggctttccggtgcggatcca	atgcaccagaaaaccgccttccagatccaccggcgtggtggccagcgggcgccaatcaacTCTGTAGAACCACCCCTGGGTTGGATCGGCGGCTGCGTGACGACGTGAGTCAGGCTCAATATCGGGCCAATAACGCTGACGCTGCCAAGGGTACGTAGGAAGAGGCACGCGGCGACCGGCAGTTGGGAACACACCAGGCCAGGATACGGAACCCCCTGCTGCCCACAAGCGGCCAAGCGCTTCCAACACTCCTGCTGCTTCTTCACGTCCGGCGCGCAGCGATGCTAACAAGGT	CGGTTCTGCTTCCGGTAAGCACG	ggctttccggtgcggatccaatgcaccagaaaaccgccttccagatccaccggcgtggtggccagcgggcgccaatcaacTCTGTAGAACCACCCCTGGGTTGGATCGGCGGCTGCGTGACGACGTGAGTCAGGCTCAATATCGGGCCAATAACGCTGACGCTGCCAAGGGTACGTAGGAAGAGGCACGCGGCGACCGGCAGTTGGGAACACACCAGGCCAGGATACGGAACCCCCTGCTGCCCACAAGCGGCCAAGCGCTTCCAACACTCCTGCTGCTTCTTCACGTCCGGCGCGCAGCGATGCTAACAAGGTCGGTTCTGCTTCCGGTAAGCACG	337	ggctttccggtgcggatccaatgcaccagaaaaccgccttccagatccaccggcgtggtggccagcgggcgccaatcaacTCTGTAGAACCACCCCTGGGTTGGATCGGCGGCTGCGTGACGACGTGAGTCAGGCTCAATATCGGGCCAATAACGCTGACGCTGCCAAGGGTACGTAGGAAGAGGCACGCGGCGACCGGCAGTTGGGAACACACCAGGCCAGGATACGGAACCCCCTGCTGCCCACAAGCGGCCAAGCGCTTCCAACACTCCTGCTGCTTCTTCACGTCCGGCGCGCAGCGATGCTAACAAGGTCGGTTCTGCTTCCGGTAAGCACG
ds71	R80	ggctttccggtgcggatcca	atgcaccagaaaaccgccttccagatccaccggcgtggtggccagcgggcgccaatcCACTCTGTAGAACCACCCCTGGGTTGGATCGGCGGCTGCGTGACGACGTGAGTCAGGCTCAATATCGGGCCAATAACGCTGACGCTGCCAAGGGTACGTAGGAAGAGGCACGCGGCGACCGGCAGTTGGGAACACACCAGGCCAGGATACGGAACCCCCTGCTGCCCACAAGCGGCCAAGCGCTTCCAACACTCCTGCTGCTTCTTCACGTCCGGCGCGCAGCGATGCTAACAAGGT	CGGTTCTGCTTCCGGTAAGCACG	ggctttccggtgcggatccaatgcaccagaaaaccgccttccagatccaccggcgtggtggccagcgggcgccaatcCACTCTGTAGAACCACCCCTGGGTTGGATCGGCGGCTGCGTGACGACGTGAGTCAGGCTCAATATCGGGCCAATAACGCTGACGCTGCCAAGGGTACGTAGGAAGAGGCACGCGGCGACCGGCAGTTGGGAACACACCAGGCCAGGATACGGAACCCCCTGCTGCCCACAAGCGGCCAAGCGCTTCCAACACTCCTGCTGCTTCTTCACGTCCGGCGCGCAGCGATGCTAACAAGGTCGGTTCTGCTTCCGGTAAGCACG	337	ggctttccggtgcggatccaatgcaccagaaaaccgccttccagatccaccggcgtggtggccagcgggcgccaatcCACTCTGTAGAACCACCCCTGGGTTGGATCGGCGGCTGCGTGACGACGTGAGTCAGGCTCAATATCGGGCCAATAACGCTGACGCTGCCAAGGGTACGTAGGAAGAGGCACGCGGCGACCGGCAGTTGGGAACACACCAGGCCAGGATACGGAACCCCCTGCTGCCCACAAGCGGCCAAGCGCTTCCAACACTCCTGCTGCTTCTTCACGTCCGGCGCGCAGCGATGCTAACAAGGTCGGTTCTGCTTCCGGTAAGCACG
ds72	R81	ggctttccggtgcggatcca	atgcaccagaaaaccgccttccagatccaccggcgtggtggccagcgggcgccaGTCCACTCTGTAGAACCACCCCTGGGTTGGATCGGCGGCTGCGTGACGACGTGAGTCAGGCTCAATATCGGGCCAATAACGCTGACGCTGCCAAGGGTACGTAGGAAGAGGCACGCGGCGACCGGCAGTTGGGAACACACCAGGCCAGGATACGGAACCCCCTGCTGCCCACAAGCGGCCAAGCGCTTCCAACACTCCTGCTGCTTCTTCACGTCCGGCGCGCAGCGATGCTAACAAGGT	CGGTTCTGCTTCCGGTAAGCACG	ggctttccggtgcggatccaatgcaccagaaaaccgccttccagatccaccggcgtggtggccagcgggcgccaGTCCACTCTGTAGAACCACCCCTGGGTTGGATCGGCGGCTGCGTGACGACGTGAGTCAGGCTCAATATCGGGCCAATAACGCTGACGCTGCCAAGGGTACGTAGGAAGAGGCACGCGGCGACCGGCAGTTGGGAACACACCAGGCCAGGATACGGAACCCCCTGCTGCCCACAAGCGGCCAAGCGCTTCCAACACTCCTGCTGCTTCTTCACGTCCGGCGCGCAGCGATGCTAACAAGGTCGGTTCTGCTTCCGGTAAGCACG	337	ggctttccggtgcggatccaatgcaccagaaaaccgccttccagatccaccggcgtggtggccagcgggcgccaGTCCACTCTGTAGAACCACCCCTGGGTTGGATCGGCGGCTGCGTGACGACGTGAGTCAGGCTCAATATCGGGCCAATAACGCTGACGCTGCCAAGGGTACGTAGGAAGAGGCACGCGGCGACCGGCAGTTGGGAACACACCAGGCCAGGATACGGAACCCCCTGCTGCCCACAAGCGGCCAAGCGCTTCCAACACTCCTGCTGCTTCTTCACGTCCGGCGCGCAGCGATGCTAACAAGGTCGGTTCTGCTTCCGGTAAGCACG
ds73	R82	ggctttccggtgcggatcca	atgcaccagaaaaccgccttccagatccaccggcgtggtggccagcgggcgCCAGTCCACTCTGTAGAACCACCCCTGGGTTGGATCGGCGGCTGCGTGACGACGTGAGTCAGGCTCAATATCGGGCCAATAACGCTGACGCTGCCAAGGGTACGTAGGAAGAGGCACGCGGCGACCGGCAGTTGGGAACACACCAGGCCAGGATACGGAACCCCCTGCTGCCCACAAGCGGCCAAGCGCTTCCAACACTCCTGCTGCTTCTTCACGTCCGGCGCGCAGCGATGCTAACAAGGT	CGGTTCTGCTTCCGGTAAGCACG	ggctttccggtgcggatccaatgcaccagaaaaccgccttccagatccaccggcgtggtggccagcgggcgCCAGTCCACTCTGTAGAACCACCCCTGGGTTGGATCGGCGGCTGCGTGACGACGTGAGTCAGGCTCAATATCGGGCCAATAACGCTGACGCTGCCAAGGGTACGTAGGAAGAGGCACGCGGCGACCGGCAGTTGGGAACACACCAGGCCAGGATACGGAACCCCCTGCTGCCCACAAGCGGCCAAGCGCTTCCAACACTCCTGCTGCTTCTTCACGTCCGGCGCGCAGCGATGCTAACAAGGTCGGTTCTGCTTCCGGTAAGCACG	337	ggctttccggtgcggatccaatgcaccagaaaaccgccttccagatccaccggcgtggtggccagcgggcgCCAGTCCACTCTGTAGAACCACCCCTGGGTTGGATCGGCGGCTGCGTGACGACGTGAGTCAGGCTCAATATCGGGCCAATAACGCTGACGCTGCCAAGGGTACGTAGGAAGAGGCACGCGGCGACCGGCAGTTGGGAACACACCAGGCCAGGATACGGAACCCCCTGCTGCCCACAAGCGGCCAAGCGCTTCCAACACTCCTGCTGCTTCTTCACGTCCGGCGCGCAGCGATGCTAACAAGGTCGGTTCTGCTTCCGGTAAGCACG
ds74	R83	ggctttccggtgcggatcca	atgcaccagaaaaccgccttccagatccaccggcgtggtggccagcggCGGCCAGTCCACTCTGTAGAACCACCCCTGGGTTGGATCGGCGGCTGCGTGACGACGTGAGTCAGGCTCAATATCGGGCCAATAACGCTGACGCTGCCAAGGGTACGTAGGAAGAGGCACGCGGCGACCGGCAGTTGGGAACACACCAGGCCAGGATACGGAACCCCCTGCTGCCCACAAGCGGCCAAGCGCTTCCAACACTCCTGCTGCTTCTTCACGTCCGGCGCGCAGCGATGCTAACAAGGT	CGGTTCTGCTTCCGGTAAGCACG	ggctttccggtgcggatccaatgcaccagaaaaccgccttccagatccaccggcgtggtggccagcggCGGCCAGTCCACTCTGTAGAACCACCCCTGGGTTGGATCGGCGGCTGCGTGACGACGTGAGTCAGGCTCAATATCGGGCCAATAACGCTGACGCTGCCAAGGGTACGTAGGAAGAGGCACGCGGCGACCGGCAGTTGGGAACACACCAGGCCAGGATACGGAACCCCCTGCTGCCCACAAGCGGCCAAGCGCTTCCAACACTCCTGCTGCTTCTTCACGTCCGGCGCGCAGCGATGCTAACAAGGTCGGTTCTGCTTCCGGTAAGCACG	337	ggctttccggtgcggatccaatgcaccagaaaaccgccttccagatccaccggcgtggtggccagcggCGGCCAGTCCACTCTGTAGAACCACCCCTGGGTTGGATCGGCGGCTGCGTGACGACGTGAGTCAGGCTCAATATCGGGCCAATAACGCTGACGCTGCCAAGGGTACGTAGGAAGAGGCACGCGGCGACCGGCAGTTGGGAACACACCAGGCCAGGATACGGAACCCCCTGCTGCCCACAAGCGGCCAAGCGCTTCCAACACTCCTGCTGCTTCTTCACGTCCGGCGCGCAGCGATGCTAACAAGGTCGGTTCTGCTTCCGGTAAGCACG
ds75	R84	ggctttccggtgcggatcca	atgcaccagaaaaccgccttccagatccaccggcgtggtggccagTTCCGGCCAGTCCACTCTGTAGAACCACCCCTGGGTTGGATCGGCGGCTGCGTGACGACGTGAGTCAGGCTCAATATCGGGCCAATAACGCTGACGCTGCCAAGGGTACGTAGGAAGAGGCACGCGGCGACCGGCAGTTGGGAACACACCAGGCCAGGATACGGAACCCCCTGCTGCCCACAAGCGGCCAAGCGCTTCCAACACTCCTGCTGCTTCTTCACGTCCGGCGCGCAGCGATGCTAACAAGGT	CGGTTCTGCTTCCGGTAAGCACG	ggctttccggtgcggatccaatgcaccagaaaaccgccttccagatccaccggcgtggtggccagTTCCGGCCAGTCCACTCTGTAGAACCACCCCTGGGTTGGATCGGCGGCTGCGTGACGACGTGAGTCAGGCTCAATATCGGGCCAATAACGCTGACGCTGCCAAGGGTACGTAGGAAGAGGCACGCGGCGACCGGCAGTTGGGAACACACCAGGCCAGGATACGGAACCCCCTGCTGCCCACAAGCGGCCAAGCGCTTCCAACACTCCTGCTGCTTCTTCACGTCCGGCGCGCAGCGATGCTAACAAGGTCGGTTCTGCTTCCGGTAAGCACG	337	ggctttccggtgcggatccaatgcaccagaaaaccgccttccagatccaccggcgtggtggccagTTCCGGCCAGTCCACTCTGTAGAACCACCCCTGGGTTGGATCGGCGGCTGCGTGACGACGTGAGTCAGGCTCAATATCGGGCCAATAACGCTGACGCTGCCAAGGGTACGTAGGAAGAGGCACGCGGCGACCGGCAGTTGGGAACACACCAGGCCAGGATACGGAACCCCCTGCTGCCCACAAGCGGCCAAGCGCTTCCAACACTCCTGCTGCTTCTTCACGTCCGGCGCGCAGCGATGCTAACAAGGTCGGTTCTGCTTCCGGTAAGCACG
ds76	R85	ggctttccggtgcggatcca	atgcaccagaaaaccgccttccagatccaccggcgtggtggcGATTTCCGGCCAGTCCACTCTGTAGAACCACCCCTGGGTTGGATCGGCGGCTGCGTGACGACGTGAGTCAGGCTCAATATCGGGCCAATAACGCTGACGCTGCCAAGGGTACGTAGGAAGAGGCACGCGGCGACCGGCAGTTGGGAACACACCAGGCCAGGATACGGAACCCCCTGCTGCCCACAAGCGGCCAAGCGCTTCCAACACTCCTGCTGCTTCTTCACGTCCGGCGCGCAGCGATGCTAACAAGGT	CGGTTCTGCTTCCGGTAAGCACG	ggctttccggtgcggatccaatgcaccagaaaaccgccttccagatccaccggcgtggtggcGATTTCCGGCCAGTCCACTCTGTAGAACCACCCCTGGGTTGGATCGGCGGCTGCGTGACGACGTGAGTCAGGCTCAATATCGGGCCAATAACGCTGACGCTGCCAAGGGTACGTAGGAAGAGGCACGCGGCGACCGGCAGTTGGGAACACACCAGGCCAGGATACGGAACCCCCTGCTGCCCACAAGCGGCCAAGCGCTTCCAACACTCCTGCTGCTTCTTCACGTCCGGCGCGCAGCGATGCTAACAAGGTCGGTTCTGCTTCCGGTAAGCACG	337	ggctttccggtgcggatccaatgcaccagaaaaccgccttccagatccaccggcgtggtggcGATTTCCGGCCAGTCCACTCTGTAGAACCACCCCTGGGTTGGATCGGCGGCTGCGTGACGACGTGAGTCAGGCTCAATATCGGGCCAATAACGCTGACGCTGCCAAGGGTACGTAGGAAGAGGCACGCGGCGACCGGCAGTTGGGAACACACCAGGCCAGGATACGGAACCCCCTGCTGCCCACAAGCGGCCAAGCGCTTCCAACACTCCTGCTGCTTCTTCACGTCCGGCGCGCAGCGATGCTAACAAGGTCGGTTCTGCTTCCGGTAAGCACG
ds77	R86	ggctttccggtgcggatcca	atgcaccagaaaaccgccttccagatccaccggcgtggtAGGGATTTCCGGCCAGTCCACTCTGTAGAACCACCCCTGGGTTGGATCGGCGGCTGCGTGACGACGTGAGTCAGGCTCAATATCGGGCCAATAACGCTGACGCTGCCAAGGGTACGTAGGAAGAGGCACGCGGCGACCGGCAGTTGGGAACACACCAGGCCAGGATACGGAACCCCCTGCTGCCCACAAGCGGCCAAGCGCTTCCAACACTCCTGCTGCTTCTTCACGTCCGGCGCGCAGCGATGCTAACAAGGT	CGGTTCTGCTTCCGGTAAGCACG	ggctttccggtgcggatccaatgcaccagaaaaccgccttccagatccaccggcgtggtAGGGATTTCCGGCCAGTCCACTCTGTAGAACCACCCCTGGGTTGGATCGGCGGCTGCGTGACGACGTGAGTCAGGCTCAATATCGGGCCAATAACGCTGACGCTGCCAAGGGTACGTAGGAAGAGGCACGCGGCGACCGGCAGTTGGGAACACACCAGGCCAGGATACGGAACCCCCTGCTGCCCACAAGCGGCCAAGCGCTTCCAACACTCCTGCTGCTTCTTCACGTCCGGCGCGCAGCGATGCTAACAAGGTCGGTTCTGCTTCCGGTAAGCACG	337	ggctttccggtgcggatccaatgcaccagaaaaccgccttccagatccaccggcgtggtAGGGATTTCCGGCCAGTCCACTCTGTAGAACCACCCCTGGGTTGGATCGGCGGCTGCGTGACGACGTGAGTCAGGCTCAATATCGGGCCAATAACGCTGACGCTGCCAAGGGTACGTAGGAAGAGGCACGCGGCGACCGGCAGTTGGGAACACACCAGGCCAGGATACGGAACCCCCTGCTGCCCACAAGCGGCCAAGCGCTTCCAACACTCCTGCTGCTTCTTCACGTCCGGCGCGCAGCGATGCTAACAAGGTCGGTTCTGCTTCCGGTAAGCACG
ds78	R87	ggctttccggtgcggatcca	atgcaccagaaaaccgccttccagatccaccggcgtGCGAGGGATTTCCGGCCAGTCCACTCTGTAGAACCACCCCTGGGTTGGATCGGCGGCTGCGTGACGACGTGAGTCAGGCTCAATATCGGGCCAATAACGCTGACGCTGCCAAGGGTACGTAGGAAGAGGCACGCGGCGACCGGCAGTTGGGAACACACCAGGCCAGGATACGGAACCCCCTGCTGCCCACAAGCGGCCAAGCGCTTCCAACACTCCTGCTGCTTCTTCACGTCCGGCGCGCAGCGATGCTAACAAGGT	CGGTTCTGCTTCCGGTAAGCACG	ggctttccggtgcggatccaatgcaccagaaaaccgccttccagatccaccggcgtGCGAGGGATTTCCGGCCAGTCCACTCTGTAGAACCACCCCTGGGTTGGATCGGCGGCTGCGTGACGACGTGAGTCAGGCTCAATATCGGGCCAATAACGCTGACGCTGCCAAGGGTACGTAGGAAGAGGCACGCGGCGACCGGCAGTTGGGAACACACCAGGCCAGGATACGGAACCCCCTGCTGCCCACAAGCGGCCAAGCGCTTCCAACACTCCTGCTGCTTCTTCACGTCCGGCGCGCAGCGATGCTAACAAGGTCGGTTCTGCTTCCGGTAAGCACG	337	ggctttccggtgcggatccaatgcaccagaaaaccgccttccagatccaccggcgtGCGAGGGATTTCCGGCCAGTCCACTCTGTAGAACCACCCCTGGGTTGGATCGGCGGCTGCGTGACGACGTGAGTCAGGCTCAATATCGGGCCAATAACGCTGACGCTGCCAAGGGTACGTAGGAAGAGGCACGCGGCGACCGGCAGTTGGGAACACACCAGGCCAGGATACGGAACCCCCTGCTGCCCACAAGCGGCCAAGCGCTTCCAACACTCCTGCTGCTTCTTCACGTCCGGCGCGCAGCGATGCTAACAAGGTCGGTTCTGCTTCCGGTAAGCACG
ds79	R88	ggctttccggtgcggatcca	atgcaccagaaaaccgccttccagatccaccggCGAGCGAGGGATTTCCGGCCAGTCCACTCTGTAGAACCACCCCTGGGTTGGATCGGCGGCTGCGTGACGACGTGAGTCAGGCTCAATATCGGGCCAATAACGCTGACGCTGCCAAGGGTACGTAGGAAGAGGCACGCGGCGACCGGCAGTTGGGAACACACCAGGCCAGGATACGGAACCCCCTGCTGCCCACAAGCGGCCAAGCGCTTCCAACACTCCTGCTGCTTCTTCACGTCCGGCGCGCAGCGATGCTAACAAGGT	CGGTTCTGCTTCCGGTAAGCACG	ggctttccggtgcggatccaatgcaccagaaaaccgccttccagatccaccggCGAGCGAGGGATTTCCGGCCAGTCCACTCTGTAGAACCACCCCTGGGTTGGATCGGCGGCTGCGTGACGACGTGAGTCAGGCTCAATATCGGGCCAATAACGCTGACGCTGCCAAGGGTACGTAGGAAGAGGCACGCGGCGACCGGCAGTTGGGAACACACCAGGCCAGGATACGGAACCCCCTGCTGCCCACAAGCGGCCAAGCGCTTCCAACACTCCTGCTGCTTCTTCACGTCCGGCGCGCAGCGATGCTAACAAGGTCGGTTCTGCTTCCGGTAAGCACG	337	ggctttccggtgcggatccaatgcaccagaaaaccgccttccagatccaccggCGAGCGAGGGATTTCCGGCCAGTCCACTCTGTAGAACCACCCCTGGGTTGGATCGGCGGCTGCGTGACGACGTGAGTCAGGCTCAATATCGGGCCAATAACGCTGACGCTGCCAAGGGTACGTAGGAAGAGGCACGCGGCGACCGGCAGTTGGGAACACACCAGGCCAGGATACGGAACCCCCTGCTGCCCACAAGCGGCCAAGCGCTTCCAACACTCCTGCTGCTTCTTCACGTCCGGCGCGCAGCGATGCTAACAAGGTCGGTTCTGCTTCCGGTAAGCACG
ds80	R89	ggctttccggtgcggatcca	atgcaccagaaaaccgccttccagatccacAAGCGAGCGAGGGATTTCCGGCCAGTCCACTCTGTAGAACCACCCCTGGGTTGGATCGGCGGCTGCGTGACGACGTGAGTCAGGCTCAATATCGGGCCAATAACGCTGACGCTGCCAAGGGTACGTAGGAAGAGGCACGCGGCGACCGGCAGTTGGGAACACACCAGGCCAGGATACGGAACCCCCTGCTGCCCACAAGCGGCCAAGCGCTTCCAACACTCCTGCTGCTTCTTCACGTCCGGCGCGCAGCGATGCTAACAAGGT	CGGTTCTGCTTCCGGTAAGCACG	ggctttccggtgcggatccaatgcaccagaaaaccgccttccagatccacAAGCGAGCGAGGGATTTCCGGCCAGTCCACTCTGTAGAACCACCCCTGGGTTGGATCGGCGGCTGCGTGACGACGTGAGTCAGGCTCAATATCGGGCCAATAACGCTGACGCTGCCAAGGGTACGTAGGAAGAGGCACGCGGCGACCGGCAGTTGGGAACACACCAGGCCAGGATACGGAACCCCCTGCTGCCCACAAGCGGCCAAGCGCTTCCAACACTCCTGCTGCTTCTTCACGTCCGGCGCGCAGCGATGCTAACAAGGTCGGTTCTGCTTCCGGTAAGCACG	337	ggctttccggtgcggatccaatgcaccagaaaaccgccttccagatccacAAGCGAGCGAGGGATTTCCGGCCAGTCCACTCTGTAGAACCACCCCTGGGTTGGATCGGCGGCTGCGTGACGACGTGAGTCAGGCTCAATATCGGGCCAATAACGCTGACGCTGCCAAGGGTACGTAGGAAGAGGCACGCGGCGACCGGCAGTTGGGAACACACCAGGCCAGGATACGGAACCCCCTGCTGCCCACAAGCGGCCAAGCGCTTCCAACACTCCTGCTGCTTCTTCACGTCCGGCGCGCAGCGATGCTAACAAGGTCGGTTCTGCTTCCGGTAAGCACG
ds81	R90	ggctttccggtgcggatcca	atgcaccagaaaaccgccttccagatcCTGAAGCGAGCGAGGGATTTCCGGCCAGTCCACTCTGTAGAACCACCCCTGGGTTGGATCGGCGGCTGCGTGACGACGTGAGTCAGGCTCAATATCGGGCCAATAACGCTGACGCTGCCAAGGGTACGTAGGAAGAGGCACGCGGCGACCGGCAGTTGGGAACACACCAGGCCAGGATACGGAACCCCCTGCTGCCCACAAGCGGCCAAGCGCTTCCAACACTCCTGCTGCTTCTTCACGTCCGGCGCGCAGCGATGCTAACAAGGT	CGGTTCTGCTTCCGGTAAGCACG	ggctttccggtgcggatccaatgcaccagaaaaccgccttccagatcCTGAAGCGAGCGAGGGATTTCCGGCCAGTCCACTCTGTAGAACCACCCCTGGGTTGGATCGGCGGCTGCGTGACGACGTGAGTCAGGCTCAATATCGGGCCAATAACGCTGACGCTGCCAAGGGTACGTAGGAAGAGGCACGCGGCGACCGGCAGTTGGGAACACACCAGGCCAGGATACGGAACCCCCTGCTGCCCACAAGCGGCCAAGCGCTTCCAACACTCCTGCTGCTTCTTCACGTCCGGCGCGCAGCGATGCTAACAAGGTCGGTTCTGCTTCCGGTAAGCACG	337	ggctttccggtgcggatccaatgcaccagaaaaccgccttccagatcCTGAAGCGAGCGAGGGATTTCCGGCCAGTCCACTCTGTAGAACCACCCCTGGGTTGGATCGGCGGCTGCGTGACGACGTGAGTCAGGCTCAATATCGGGCCAATAACGCTGACGCTGCCAAGGGTACGTAGGAAGAGGCACGCGGCGACCGGCAGTTGGGAACACACCAGGCCAGGATACGGAACCCCCTGCTGCCCACAAGCGGCCAAGCGCTTCCAACACTCCTGCTGCTTCTTCACGTCCGGCGCGCAGCGATGCTAACAAGGTCGGTTCTGCTTCCGGTAAGCACG
ds82a	R91	ggctttccggtgcggatcca	atgcaccagaaaaccgccttccagTTTCTGAAGCGAGCGAGGGATTTCCGGCCAGTCCACTCTGTAGAACCACCCCTGGGTTGGATCGGCGGCTGCGTGACGACGTGAGTCAGGCTCAATATCGGGCCAATAACGCTGACGCTGCCAAGGGTACGTAGGAAGAGGCACGCGGCGACCGGCAGTTGGGAACACACCAGGCCAGGATACGGAACCCCCTGCTGCCCACAAGCGGCCAAGCGCTTCCAACACTCCTGCTGCTTCTTCACGTCCGGCGCGCAGCGATGCTAACAAGGT	CGGTTCTGCTTCCGGTAAGCACG	ggctttccggtgcggatccaatgcaccagaaaaccgccttccagTTTCTGAAGCGAGCGAGGGATTTCCGGCCAGTCCACTCTGTAGAACCACCCCTGGGTTGGATCGGCGGCTGCGTGACGACGTGAGTCAGGCTCAATATCGGGCCAATAACGCTGACGCTGCCAAGGGTACGTAGGAAGAGGCACGCGGCGACCGGCAGTTGGGAACACACCAGGCCAGGATACGGAACCCCCTGCTGCCCACAAGCGGCCAAGCGCTTCCAACACTCCTGCTGCTTCTTCACGTCCGGCGCGCAGCGATGCTAACAAGGTCGGTTCTGCTTCCGGTAAGCACG	337	ggctttccggtgcggatccaatgcaccagaaaaccgccttccagTTTCTGAAGCGAGCGAGGGATTTCCGGCCAGTCCACTCTGTAGAACCACCCCTGGGTTGGATCGGCGGCTGCGTGACGACGTGAGTCAGGCTCAATATCGGGCCAATAACGCTGACGCTGCCAAGGGTACGTAGGAAGAGGCACGCGGCGACCGGCAGTTGGGAACACACCAGGCCAGGATACGGAACCCCCTGCTGCCCACAAGCGGCCAAGCGCTTCCAACACTCCTGCTGCTTCTTCACGTCCGGCGCGCAGCGATGCTAACAAGGTCGGTTCTGCTTCCGGTAAGCACG
ds82b	R92	ggctttccggtgcggatcca	atgcaccagaaaaccgccttccagAGATTTCTGAAGCGAGCGAGGGATTTCCGGCCAGTCCACTCTGTAGAACCACCCCTGGGTTGGATCGGCGGCTGCGTGACGACGTGAGTCAGGCTCAATATCGGGCCAATAACGCTGACGCTGCCAAGGGTACGTAGGAAGAGGCACGCGGCGACCGGCAGTTGGGAACACACCAGGCCAGGATACGGAACCCCCTGCTGCCCACAAGCGGCCAAGCGCTTCCAACACTCCTGCTGCTTCTTCACGTCCGGCGCGCAGCGATGCTAACAAGGT	CGGTTCTGCTTCCGGTAAGCACG	ggctttccggtgcggatccaatgcaccagaaaaccgccttccagAGATTTCTGAAGCGAGCGAGGGATTTCCGGCCAGTCCACTCTGTAGAACCACCCCTGGGTTGGATCGGCGGCTGCGTGACGACGTGAGTCAGGCTCAATATCGGGCCAATAACGCTGACGCTGCCAAGGGTACGTAGGAAGAGGCACGCGGCGACCGGCAGTTGGGAACACACCAGGCCAGGATACGGAACCCCCTGCTGCCCACAAGCGGCCAAGCGCTTCCAACACTCCTGCTGCTTCTTCACGTCCGGCGCGCAGCGATGCTAACAAGGTCGGTTCTGCTTCCGGTAAGCACG	340	ggctttccggtgcggatccaatgcaccagaaaaccgccttccagAGATTTCTGAAGCGAGCGAGGGATTTCCGGCCAGTCCACTCTGTAGAACCACCCCTGGGTTGGATCGGCGGCTGCGTGACGACGTGAGTCAGGCTCAATATCGGGCCAATAACGCTGACGCTGCCAAGGGTACGTAGGAAGAGGCACGCGGCGACCGGCAGTTGGGAACACACCAGGCCAGGATACGGAACCCCCTGCTGCCCACAAGCGGCCAAGCGCTTCCAACACTCCTGCTGCTTCTTCACGTCCGGCGCGCAGCGATGCTAACAAGGTCGGTTCTGCTTCCGGTAAGCACG
ds82c	R93	ggctttccggtgcggatcca	atgcaccagaaaaccgccttccagTTCAGATTTCTGAAGCGAGCGAGGGATTTCCGGCCAGTCCACTCTGTAGAACCACCCCTGGGTTGGATCGGCGGCTGCGTGACGACGTGAGTCAGGCTCAATATCGGGCCAATAACGCTGACGCTGCCAAGGGTACGTAGGAAGAGGCACGCGGCGACCGGCAGTTGGGAACACACCAGGCCAGGATACGGAACCCCCTGCTGCCCACAAGCGGCCAAGCGCTTCCAACACTCCTGCTGCTTCTTCACGTCCGGCGCGCAGCGATGCTAACAAGGT	CGGTTCTGCTTCCGGTAAGCACG	ggctttccggtgcggatccaatgcaccagaaaaccgccttccagTTCAGATTTCTGAAGCGAGCGAGGGATTTCCGGCCAGTCCACTCTGTAGAACCACCCCTGGGTTGGATCGGCGGCTGCGTGACGACGTGAGTCAGGCTCAATATCGGGCCAATAACGCTGACGCTGCCAAGGGTACGTAGGAAGAGGCACGCGGCGACCGGCAGTTGGGAACACACCAGGCCAGGATACGGAACCCCCTGCTGCCCACAAGCGGCCAAGCGCTTCCAACACTCCTGCTGCTTCTTCACGTCCGGCGCGCAGCGATGCTAACAAGGTCGGTTCTGCTTCCGGTAAGCACG	343	ggctttccggtgcggatccaatgcaccagaaaaccgccttccagTTCAGATTTCTGAAGCGAGCGAGGGATTTCCGGCCAGTCCACTCTGTAGAACCACCCCTGGGTTGGATCGGCGGCTGCGTGACGACGTGAGTCAGGCTCAATATCGGGCCAATAACGCTGACGCTGCCAAGGGTACGTAGGAAGAGGCACGCGGCGACCGGCAGTTGGGAACACACCAGGCCAGGATACGGAACCCCCTGCTGCCCACAAGCGGCCAAGCGCTTCCAACACTCCTGCTGCTTCTTCACGTCCGGCGCGCAGCGATGCTAACAAGGTCGGTTCTGCTTCCGGTAAGCACG
ds82d	R94	ggctttccggtgcggatcca	atgcaccagaaaaccgccttccagCTCTTCAGATTTCTGAAGCGAGCGAGGGATTTCCGGCCAGTCCACTCTGTAGAACCACCCCTGGGTTGGATCGGCGGCTGCGTGACGACGTGAGTCAGGCTCAATATCGGGCCAATAACGCTGACGCTGCCAAGGGTACGTAGGAAGAGGCACGCGGCGACCGGCAGTTGGGAACACACCAGGCCAGGATACGGAACCCCCTGCTGCCCACAAGCGGCCAAGCGCTTCCAACACTCCTGCTGCTTCTTCACGTCCGGCGCGCAGCGATGCTAACAAGGT	CGGTTCTGCTTCCGGTAAGCACG	ggctttccggtgcggatccaatgcaccagaaaaccgccttccagCTCTTCAGATTTCTGAAGCGAGCGAGGGATTTCCGGCCAGTCCACTCTGTAGAACCACCCCTGGGTTGGATCGGCGGCTGCGTGACGACGTGAGTCAGGCTCAATATCGGGCCAATAACGCTGACGCTGCCAAGGGTACGTAGGAAGAGGCACGCGGCGACCGGCAGTTGGGAACACACCAGGCCAGGATACGGAACCCCCTGCTGCCCACAAGCGGCCAAGCGCTTCCAACACTCCTGCTGCTTCTTCACGTCCGGCGCGCAGCGATGCTAACAAGGTCGGTTCTGCTTCCGGTAAGCACG	346	ggctttccggtgcggatccaatgcaccagaaaaccgccttccagCTCTTCAGATTTCTGAAGCGAGCGAGGGATTTCCGGCCAGTCCACTCTGTAGAACCACCCCTGGGTTGGATCGGCGGCTGCGTGACGACGTGAGTCAGGCTCAATATCGGGCCAATAACGCTGACGCTGCCAAGGGTACGTAGGAAGAGGCACGCGGCGACCGGCAGTTGGGAACACACCAGGCCAGGATACGGAACCCCCTGCTGCCCACAAGCGGCCAAGCGCTTCCAACACTCCTGCTGCTTCTTCACGTCCGGCGCGCAGCGATGCTAACAAGGTCGGTTCTGCTTCCGGTAAGCACG
ds82e	R95	ggctttccggtgcggatcca	atgcaccagaaaaccgccttccagTGCCTCTTCAGATTTCTGAAGCGAGCGAGGGATTTCCGGCCAGTCCACTCTGTAGAACCACCCCTGGGTTGGATCGGCGGCTGCGTGACGACGTGAGTCAGGCTCAATATCGGGCCAATAACGCTGACGCTGCCAAGGGTACGTAGGAAGAGGCACGCGGCGACCGGCAGTTGGGAACACACCAGGCCAGGATACGGAACCCCCTGCTGCCCACAAGCGGCCAAGCGCTTCCAACACTCCTGCTGCTTCTTCACGTCCGGCGCGCAGCGATGCTAACAAGGT	CGGTTCTGCTTCCGGTAAGCACG	ggctttccggtgcggatccaatgcaccagaaaaccgccttccagTGCCTCTTCAGATTTCTGAAGCGAGCGAGGGATTTCCGGCCAGTCCACTCTGTAGAACCACCCCTGGGTTGGATCGGCGGCTGCGTGACGACGTGAGTCAGGCTCAATATCGGGCCAATAACGCTGACGCTGCCAAGGGTACGTAGGAAGAGGCACGCGGCGACCGGCAGTTGGGAACACACCAGGCCAGGATACGGAACCCCCTGCTGCCCACAAGCGGCCAAGCGCTTCCAACACTCCTGCTGCTTCTTCACGTCCGGCGCGCAGCGATGCTAACAAGGTCGGTTCTGCTTCCGGTAAGCACG	349	ggctttccggtgcggatccaatgcaccagaaaaccgccttccagTGCCTCTTCAGATTTCTGAAGCGAGCGAGGGATTTCCGGCCAGTCCACTCTGTAGAACCACCCCTGGGTTGGATCGGCGGCTGCGTGACGACGTGAGTCAGGCTCAATATCGGGCCAATAACGCTGACGCTGCCAAGGGTACGTAGGAAGAGGCACGCGGCGACCGGCAGTTGGGAACACACCAGGCCAGGATACGGAACCCCCTGCTGCCCACAAGCGGCCAAGCGCTTCCAACACTCCTGCTGCTTCTTCACGTCCGGCGCGCAGCGATGCTAACAAGGTCGGTTCTGCTTCCGGTAAGCACG
ds83	R96	ggctttccggtgcggatcca	atgcaccagaaaaccgccttcGCTTGCCTCTTCAGATTTCTGAAGCGAGCGAGGGATTTCCGGCCAGTCCACTCTGTAGAACCACCCCTGGGTTGGATCGGCGGCTGCGTGACGACGTGAGTCAGGCTCAATATCGGGCCAATAACGCTGACGCTGCCAAGGGTACGTAGGAAGAGGCACGCGGCGACCGGCAGTTGGGAACACACCAGGCCAGGATACGGAACCCCCTGCTGCCCACAAGCGGCCAAGCGCTTCCAACACTCCTGCTGCTTCTTCACGTCCGGCGCGCAGCGATGCTAACAAGGT	CGGTTCTGCTTCCGGTAAGCACG	ggctttccggtgcggatccaatgcaccagaaaaccgccttcGCTTGCCTCTTCAGATTTCTGAAGCGAGCGAGGGATTTCCGGCCAGTCCACTCTGTAGAACCACCCCTGGGTTGGATCGGCGGCTGCGTGACGACGTGAGTCAGGCTCAATATCGGGCCAATAACGCTGACGCTGCCAAGGGTACGTAGGAAGAGGCACGCGGCGACCGGCAGTTGGGAACACACCAGGCCAGGATACGGAACCCCCTGCTGCCCACAAGCGGCCAAGCGCTTCCAACACTCCTGCTGCTTCTTCACGTCCGGCGCGCAGCGATGCTAACAAGGTCGGTTCTGCTTCCGGTAAGCACG	349	ggctttccggtgcggatccaatgcaccagaaaaccgccttcGCTTGCCTCTTCAGATTTCTGAAGCGAGCGAGGGATTTCCGGCCAGTCCACTCTGTAGAACCACCCCTGGGTTGGATCGGCGGCTGCGTGACGACGTGAGTCAGGCTCAATATCGGGCCAATAACGCTGACGCTGCCAAGGGTACGTAGGAAGAGGCACGCGGCGACCGGCAGTTGGGAACACACCAGGCCAGGATACGGAACCCCCTGCTGCCCACAAGCGGCCAAGCGCTTCCAACACTCCTGCTGCTTCTTCACGTCCGGCGCGCAGCGATGCTAACAAGGTCGGTTCTGCTTCCGGTAAGCACG
ds84	R97	ggctttccggtgcggatcca	atgcaccagaaaaccgccACGGCTTGCCTCTTCAGATTTCTGAAGCGAGCGAGGGATTTCCGGCCAGTCCACTCTGTAGAACCACCCCTGGGTTGGATCGGCGGCTGCGTGACGACGTGAGTCAGGCTCAATATCGGGCCAATAACGCTGACGCTGCCAAGGGTACGTAGGAAGAGGCACGCGGCGACCGGCAGTTGGGAACACACCAGGCCAGGATACGGAACCCCCTGCTGCCCACAAGCGGCCAAGCGCTTCCAACACTCCTGCTGCTTCTTCACGTCCGGCGCGCAGCGATGCTAACAAGGT	CGGTTCTGCTTCCGGTAAGCACG	ggctttccggtgcggatccaatgcaccagaaaaccgccACGGCTTGCCTCTTCAGATTTCTGAAGCGAGCGAGGGATTTCCGGCCAGTCCACTCTGTAGAACCACCCCTGGGTTGGATCGGCGGCTGCGTGACGACGTGAGTCAGGCTCAATATCGGGCCAATAACGCTGACGCTGCCAAGGGTACGTAGGAAGAGGCACGCGGCGACCGGCAGTTGGGAACACACCAGGCCAGGATACGGAACCCCCTGCTGCCCACAAGCGGCCAAGCGCTTCCAACACTCCTGCTGCTTCTTCACGTCCGGCGCGCAGCGATGCTAACAAGGTCGGTTCTGCTTCCGGTAAGCACG	349	ggctttccggtgcggatccaatgcaccagaaaaccgccACGGCTTGCCTCTTCAGATTTCTGAAGCGAGCGAGGGATTTCCGGCCAGTCCACTCTGTAGAACCACCCCTGGGTTGGATCGGCGGCTGCGTGACGACGTGAGTCAGGCTCAATATCGGGCCAATAACGCTGACGCTGCCAAGGGTACGTAGGAAGAGGCACGCGGCGACCGGCAGTTGGGAACACACCAGGCCAGGATACGGAACCCCCTGCTGCCCACAAGCGGCCAAGCGCTTCCAACACTCCTGCTGCTTCTTCACGTCCGGCGCGCAGCGATGCTAACAAGGTCGGTTCTGCTTCCGGTAAGCACG
ds85	R98	ggctttccggtgcggatcca	atgcaccagaaaaccCCCACGGCTTGCCTCTTCAGATTTCTGAAGCGAGCGAGGGATTTCCGGCCAGTCCACTCTGTAGAACCACCCCTGGGTTGGATCGGCGGCTGCGTGACGACGTGAGTCAGGCTCAATATCGGGCCAATAACGCTGACGCTGCCAAGGGTACGTAGGAAGAGGCACGCGGCGACCGGCAGTTGGGAACACACCAGGCCAGGATACGGAACCCCCTGCTGCCCACAAGCGGCCAAGCGCTTCCAACACTCCTGCTGCTTCTTCACGTCCGGCGCGCAGCGATGCTAACAAGGT	CGGTTCTGCTTCCGGTAAGCACG	ggctttccggtgcggatccaatgcaccagaaaaccCCCACGGCTTGCCTCTTCAGATTTCTGAAGCGAGCGAGGGATTTCCGGCCAGTCCACTCTGTAGAACCACCCCTGGGTTGGATCGGCGGCTGCGTGACGACGTGAGTCAGGCTCAATATCGGGCCAATAACGCTGACGCTGCCAAGGGTACGTAGGAAGAGGCACGCGGCGACCGGCAGTTGGGAACACACCAGGCCAGGATACGGAACCCCCTGCTGCCCACAAGCGGCCAAGCGCTTCCAACACTCCTGCTGCTTCTTCACGTCCGGCGCGCAGCGATGCTAACAAGGTCGGTTCTGCTTCCGGTAAGCACG	349	ggctttccggtgcggatccaatgcaccagaaaaccCCCACGGCTTGCCTCTTCAGATTTCTGAAGCGAGCGAGGGATTTCCGGCCAGTCCACTCTGTAGAACCACCCCTGGGTTGGATCGGCGGCTGCGTGACGACGTGAGTCAGGCTCAATATCGGGCCAATAACGCTGACGCTGCCAAGGGTACGTAGGAAGAGGCACGCGGCGACCGGCAGTTGGGAACACACCAGGCCAGGATACGGAACCCCCTGCTGCCCACAAGCGGCCAAGCGCTTCCAACACTCCTGCTGCTTCTTCACGTCCGGCGCGCAGCGATGCTAACAAGGTCGGTTCTGCTTCCGGTAAGCACG
ds86	R99	ggctttccggtgcggatcca	atgcaccagaaaCGACCCACGGCTTGCCTCTTCAGATTTCTGAAGCGAGCGAGGGATTTCCGGCCAGTCCACTCTGTAGAACCACCCCTGGGTTGGATCGGCGGCTGCGTGACGACGTGAGTCAGGCTCAATATCGGGCCAATAACGCTGACGCTGCCAAGGGTACGTAGGAAGAGGCACGCGGCGACCGGCAGTTGGGAACACACCAGGCCAGGATACGGAACCCCCTGCTGCCCACAAGCGGCCAAGCGCTTCCAACACTCCTGCTGCTTCTTCACGTCCGGCGCGCAGCGATGCTAACAAGGT	CGGTTCTGCTTCCGGTAAGCACG	ggctttccggtgcggatccaatgcaccagaaaCGACCCACGGCTTGCCTCTTCAGATTTCTGAAGCGAGCGAGGGATTTCCGGCCAGTCCACTCTGTAGAACCACCCCTGGGTTGGATCGGCGGCTGCGTGACGACGTGAGTCAGGCTCAATATCGGGCCAATAACGCTGACGCTGCCAAGGGTACGTAGGAAGAGGCACGCGGCGACCGGCAGTTGGGAACACACCAGGCCAGGATACGGAACCCCCTGCTGCCCACAAGCGGCCAAGCGCTTCCAACACTCCTGCTGCTTCTTCACGTCCGGCGCGCAGCGATGCTAACAAGGTCGGTTCTGCTTCCGGTAAGCACG	349	ggctttccggtgcggatccaatgcaccagaaaCGACCCACGGCTTGCCTCTTCAGATTTCTGAAGCGAGCGAGGGATTTCCGGCCAGTCCACTCTGTAGAACCACCCCTGGGTTGGATCGGCGGCTGCGTGACGACGTGAGTCAGGCTCAATATCGGGCCAATAACGCTGACGCTGCCAAGGGTACGTAGGAAGAGGCACGCGGCGACCGGCAGTTGGGAACACACCAGGCCAGGATACGGAACCCCCTGCTGCCCACAAGCGGCCAAGCGCTTCCAACACTCCTGCTGCTTCTTCACGTCCGGCGCGCAGCGATGCTAACAAGGTCGGTTCTGCTTCCGGTAAGCACG
ds87	R100	ggctttccggtgcggatcca	atgcaccagCCACGACCCACGGCTTGCCTCTTCAGATTTCTGAAGCGAGCGAGGGATTTCCGGCCAGTCCACTCTGTAGAACCACCCCTGGGTTGGATCGGCGGCTGCGTGACGACGTGAGTCAGGCTCAATATCGGGCCAATAACGCTGACGCTGCCAAGGGTACGTAGGAAGAGGCACGCGGCGACCGGCAGTTGGGAACACACCAGGCCAGGATACGGAACCCCCTGCTGCCCACAAGCGGCCAAGCGCTTCCAACACTCCTGCTGCTTCTTCACGTCCGGCGCGCAGCGATGCTAACAAGGT	CGGTTCTGCTTCCGGTAAGCACG	ggctttccggtgcggatccaatgcaccagCCACGACCCACGGCTTGCCTCTTCAGATTTCTGAAGCGAGCGAGGGATTTCCGGCCAGTCCACTCTGTAGAACCACCCCTGGGTTGGATCGGCGGCTGCGTGACGACGTGAGTCAGGCTCAATATCGGGCCAATAACGCTGACGCTGCCAAGGGTACGTAGGAAGAGGCACGCGGCGACCGGCAGTTGGGAACACACCAGGCCAGGATACGGAACCCCCTGCTGCCCACAAGCGGCCAAGCGCTTCCAACACTCCTGCTGCTTCTTCACGTCCGGCGCGCAGCGATGCTAACAAGGTCGGTTCTGCTTCCGGTAAGCACG	349	ggctttccggtgcggatccaatgcaccagCCACGACCCACGGCTTGCCTCTTCAGATTTCTGAAGCGAGCGAGGGATTTCCGGCCAGTCCACTCTGTAGAACCACCCCTGGGTTGGATCGGCGGCTGCGTGACGACGTGAGTCAGGCTCAATATCGGGCCAATAACGCTGACGCTGCCAAGGGTACGTAGGAAGAGGCACGCGGCGACCGGCAGTTGGGAACACACCAGGCCAGGATACGGAACCCCCTGCTGCCCACAAGCGGCCAAGCGCTTCCAACACTCCTGCTGCTTCTTCACGTCCGGCGCGCAGCGATGCTAACAAGGTCGGTTCTGCTTCCGGTAAGCACG
ds88	R101	ggctttccggtgcggatcca	atgcacAAGCCACGACCCACGGCTTGCCTCTTCAGATTTCTGAAGCGAGCGAGGGATTTCCGGCCAGTCCACTCTGTAGAACCACCCCTGGGTTGGATCGGCGGCTGCGTGACGACGTGAGTCAGGCTCAATATCGGGCCAATAACGCTGACGCTGCCAAGGGTACGTAGGAAGAGGCACGCGGCGACCGGCAGTTGGGAACACACCAGGCCAGGATACGGAACCCCCTGCTGCCCACAAGCGGCCAAGCGCTTCCAACACTCCTGCTGCTTCTTCACGTCCGGCGCGCAGCGATGCTAACAAGGT	CGGTTCTGCTTCCGGTAAGCACG	ggctttccggtgcggatccaatgcacAAGCCACGACCCACGGCTTGCCTCTTCAGATTTCTGAAGCGAGCGAGGGATTTCCGGCCAGTCCACTCTGTAGAACCACCCCTGGGTTGGATCGGCGGCTGCGTGACGACGTGAGTCAGGCTCAATATCGGGCCAATAACGCTGACGCTGCCAAGGGTACGTAGGAAGAGGCACGCGGCGACCGGCAGTTGGGAACACACCAGGCCAGGATACGGAACCCCCTGCTGCCCACAAGCGGCCAAGCGCTTCCAACACTCCTGCTGCTTCTTCACGTCCGGCGCGCAGCGATGCTAACAAGGTCGGTTCTGCTTCCGGTAAGCACG	349	ggctttccggtgcggatccaatgcacAAGCCACGACCCACGGCTTGCCTCTTCAGATTTCTGAAGCGAGCGAGGGATTTCCGGCCAGTCCACTCTGTAGAACCACCCCTGGGTTGGATCGGCGGCTGCGTGACGACGTGAGTCAGGCTCAATATCGGGCCAATAACGCTGACGCTGCCAAGGGTACGTAGGAAGAGGCACGCGGCGACCGGCAGTTGGGAACACACCAGGCCAGGATACGGAACCCCCTGCTGCCCACAAGCGGCCAAGCGCTTCCAACACTCCTGCTGCTTCTTCACGTCCGGCGCGCAGCGATGCTAACAAGGTCGGTTCTGCTTCCGGTAAGCACG
ds89	R102	ggctttccggtgcggatcca	atgGACAAGCCACGACCCACGGCTTGCCTCTTCAGATTTCTGAAGCGAGCGAGGGATTTCCGGCCAGTCCACTCTGTAGAACCACCCCTGGGTTGGATCGGCGGCTGCGTGACGACGTGAGTCAGGCTCAATATCGGGCCAATAACGCTGACGCTGCCAAGGGTACGTAGGAAGAGGCACGCGGCGACCGGCAGTTGGGAACACACCAGGCCAGGATACGGAACCCCCTGCTGCCCACAAGCGGCCAAGCGCTTCCAACACTCCTGCTGCTTCTTCACGTCCGGCGCGCAGCGATGCTAACAAGGT	CGGTTCTGCTTCCGGTAAGCACG	ggctttccggtgcggatccaatgGACAAGCCACGACCCACGGCTTGCCTCTTCAGATTTCTGAAGCGAGCGAGGGATTTCCGGCCAGTCCACTCTGTAGAACCACCCCTGGGTTGGATCGGCGGCTGCGTGACGACGTGAGTCAGGCTCAATATCGGGCCAATAACGCTGACGCTGCCAAGGGTACGTAGGAAGAGGCACGCGGCGACCGGCAGTTGGGAACACACCAGGCCAGGATACGGAACCCCCTGCTGCCCACAAGCGGCCAAGCGCTTCCAACACTCCTGCTGCTTCTTCACGTCCGGCGCGCAGCGATGCTAACAAGGTCGGTTCTGCTTCCGGTAAGCACG	349	ggctttccggtgcggatccaatgGACAAGCCACGACCCACGGCTTGCCTCTTCAGATTTCTGAAGCGAGCGAGGGATTTCCGGCCAGTCCACTCTGTAGAACCACCCCTGGGTTGGATCGGCGGCTGCGTGACGACGTGAGTCAGGCTCAATATCGGGCCAATAACGCTGACGCTGCCAAGGGTACGTAGGAAGAGGCACGCGGCGACCGGCAGTTGGGAACACACCAGGCCAGGATACGGAACCCCCTGCTGCCCACAAGCGGCCAAGCGCTTCCAACACTCCTGCTGCTTCTTCACGTCCGGCGCGCAGCGATGCTAACAAGGTCGGTTCTGCTTCCGGTAAGCACG
ds90	R103	ggctttccggtgcggatcca	AAGGACAAGCCACGACCCACGGCTTGCCTCTTCAGATTTCTGAAGCGAGCGAGGGATTTCCGGCCAGTCCACTCTGTAGAACCACCCCTGGGTTGGATCGGCGGCTGCGTGACGACGTGAGTCAGGCTCAATATCGGGCCAATAACGCTGACGCTGCCAAGGGTACGTAGGAAGAGGCACGCGGCGACCGGCAGTTGGGAACACACCAGGCCAGGATACGGAACCCCCTGCTGCCCACAAGCGGCCAAGCGCTTCCAACACTCCTGCTGCTTCTTCACGTCCGGCGCGCAGCGATGCTAACAAGGT	CGGTTCTGCTTCCGGTAAGCACG	ggctttccggtgcggatccaAAGGACAAGCCACGACCCACGGCTTGCCTCTTCAGATTTCTGAAGCGAGCGAGGGATTTCCGGCCAGTCCACTCTGTAGAACCACCCCTGGGTTGGATCGGCGGCTGCGTGACGACGTGAGTCAGGCTCAATATCGGGCCAATAACGCTGACGCTGCCAAGGGTACGTAGGAAGAGGCACGCGGCGACCGGCAGTTGGGAACACACCAGGCCAGGATACGGAACCCCCTGCTGCCCACAAGCGGCCAAGCGCTTCCAACACTCCTGCTGCTTCTTCACGTCCGGCGCGCAGCGATGCTAACAAGGTCGGTTCTGCTTCCGGTAAGCACG	349	ggctttccggtgcggatccaAAGGACAAGCCACGACCCACGGCTTGCCTCTTCAGATTTCTGAAGCGAGCGAGGGATTTCCGGCCAGTCCACTCTGTAGAACCACCCCTGGGTTGGATCGGCGGCTGCGTGACGACGTGAGTCAGGCTCAATATCGGGCCAATAACGCTGACGCTGCCAAGGGTACGTAGGAAGAGGCACGCGGCGACCGGCAGTTGGGAACACACCAGGCCAGGATACGGAACCCCCTGCTGCCCACAAGCGGCCAAGCGCTTCCAACACTCCTGCTGCTTCTTCACGTCCGGCGCGCAGCGATGCTAACAAGGTCGGTTCTGCTTCCGGTAAGCACG

## Sheet: FR pool
	F01	gcggtaccaacgcacatgtgattattgctgaaccgccggaaccggaaccgctgccggaaccgggtccggttggcgtcctggccgcagctaattccgtgccggttctgctgtcagcccgtaccgaaaccgccctggcggcacaggcacgtctgctggaatctgcggtcgatgacagtgtgccgctgaccgcactggctagtgcgctggccaccggtcgtgcccatctgccgcgtcgcgcagctctgctggccggcgatcacgaacagctgcgtggtcaactgcgcgcagttgctgaaggtgtcgccgcaccgggtgccaccaccTGCATCGCGAGTTCCTCACGT
	F02	gcggtaccaacgcacatgtgattattgctgaaccgccggaaccggaaccgctgccggaaccgggtccggttggcgtcctggccgcagctaattccgtgccggttctgctgtcagcccgtaccgaaaccgccctggcggcacaggcacgtctgctggaatctgcggtcgatgacagtgtgccgctgaccgcactggctagtgcgctggccaccggtcgtgcccatctgccgcgtcgcgcagctctgctggccggcgatcacgaacagctgcgtggtcaactgcgcgcagttgctgaaggtgtcgccgcaccgggtgccaccCGCTGCATCGCGAGTTCCTCACGT
	F03	gcggtaccaacgcacatgtgattattgctgaaccgccggaaccggaaccgctgccggaaccgggtccggttggcgtcctggccgcagctaattccgtgccggttctgctgtcagcccgtaccgaaaccgccctggcggcacaggcacgtctgctggaatctgcggtcgatgacagtgtgccgctgaccgcactggctagtgcgctggccaccggtcgtgcccatctgccgcgtcgcgcagctctgctggccggcgatcacgaacagctgcgtggtcaactgcgcgcagttgctgaaggtgtcgccgcaccgggtgccGCGCGCTGCATCGCGAGTTCCTCACGT
	F07	gcggtaccaacgcacatgtgattattgctgaaccgccggaaccggaaccgctgccggaaccgggtccggttggcgtcctggccgcagctaattccgtgccggttctgctgtcagcccgtaccgaaaccgccctggcggcacaggcacgtctgctggaatctgcggtcgatgacagtgtgccgctgaccgcactggctagtgcgctggccaccggtcgtgcccatctgccgcgtcgcgcagctctgctggccggcgatcacgaacagctgcgtggtcaactgcgcgcagttgctgaaggtgtcgccCCTCCGGGAGCCGCGCGCTGCATCGCGAGTTCCTCACGT
	F08	gcggtaccaacgcacatgtgattattgctgaaccgccggaaccggaaccgctgccggaaccgggtccggttggcgtcctggccgcagctaattccgtgccggttctgctgtcagcccgtaccgaaaccgccctggcggcacaggcacgtctgctggaatctgcggtcgatgacagtgtgccgctgaccgcactggctagtgcgctggccaccggtcgtgcccatctgccgcgtcgcgcagctctgctggccggcgatcacgaacagctgcgtggtcaactgcgcgcagttgctgaaggtgtcACACCTCCGGGAGCCGCGCGCTGCATCGCGAGTTCCTCACGT
	F09	gcggtaccaacgcacatgtgattattgctgaaccgccggaaccggaaccgctgccggaaccgggtccggttggcgtcctggccgcagctaattccgtgccggttctgctgtcagcccgtaccgaaaccgccctggcggcacaggcacgtctgctggaatctgcggtcgatgacagtgtgccgctgaccgcactggctagtgcgctggccaccggtcgtgcccatctgccgcgtcgcgcagctctgctggccggcgatcacgaacagctgcgtggtcaactgcgcgcagttgctgaaggtCAGACACCTCCGGGAGCCGCGCGCTGCATCGCGAGTTCCTCACGT
	F11	gcggtaccaacgcacatgtgattattgctgaaccgccggaaccggaaccgctgccggaaccgggtccggttggcgtcctggccgcagctaattccgtgccggttctgctgtcagcccgtaccgaaaccgccctggcggcacaggcacgtctgctggaatctgcggtcgatgacagtgtgccgctgaccgcactggctagtgcgctggccaccggtcgtgcccatctgccgcgtcgcgcagctctgctggccggcgatcacgaacagctgcgtggtcaactgcgcgcagttgctCAAGGCCAGACACCTCCGGGAGCCGCGCGCTGCATCGCGAGTTCCTCACGT
	F15	gcggtaccaacgcacatgtgattattgctgaaccgccggaaccggaaccgctgccggaaccgggtccggttggcgtcctggccgcagctaattccgtgccggttctgctgtcagcccgtaccgaaaccgccctggcggcacaggcacgtctgctggaatctgcggtcgatgacagtgtgccgctgaccgcactggctagtgcgctggccaccggtcgtgcccatctgccgcgtcgcgcagctctgctggccggcgatcacgaacagctgcgtggtcaactgTCCGCCGTAGCCCAAGGCCAGACACCTCCGGGAGCCGCGCGCTGCATCGCGAGTTCCTCACGT
	F17	gcggtaccaacgcacatgtgattattgctgaaccgccggaaccggaaccgctgccggaaccgggtccggttggcgtcctggccgcagctaattccgtgccggttctgctgtcagcccgtaccgaaaccgccctggcggcacaggcacgtctgctggaatctgcggtcgatgacagtgtgccgctgaccgcactggctagtgcgctggccaccggtcgtgcccatctgccgcgtcgcgcagctctgctggccggcgatcacgaacagctgcgtggtGCTTTGTCCGCCGTAGCCCAAGGCCAGACACCTCCGGGAGCCGCGCGCTGCATCGCGAGTTCCTCACGT
	F18	gcggtaccaacgcacatgtgattattgctgaaccgccggaaccggaaccgctgccggaaccgggtccggttggcgtcctggccgcagctaattccgtgccggttctgctgtcagcccgtaccgaaaccgccctggcggcacaggcacgtctgctggaatctgcggtcgatgacagtgtgccgctgaccgcactggctagtgcgctggccaccggtcgtgcccatctgccgcgtcgcgcagctctgctggccggcgatcacgaacagctgcgtGCCGCTTTGTCCGCCGTAGCCCAAGGCCAGACACCTCCGGGAGCCGCGCGCTGCATCGCGAGTTCCTCACGT
	F19	gcggtaccaacgcacatgtgattattgctgaaccgccggaaccggaaccgctgccggaaccgggtccggttggcgtcctggccgcagctaattccgtgccggttctgctgtcagcccgtaccgaaaccgccctggcggcacaggcacgtctgctggaatctgcggtcgatgacagtgtgccgctgaccgcactggctagtgcgctggccaccggtcgtgcccatctgccgcgtcgcgcagctctgctggccggcgatcacgaacagctgCTGGCCGCTTTGTCCGCCGTAGCCCAAGGCCAGACACCTCCGGGAGCCGCGCGCTGCATCGCGAGTTCCTCACGT
	F21	gcggtaccaacgcacatgtgattattgctgaaccgccggaaccggaaccgctgccggaaccgggtccggttggcgtcctggccgcagctaattccgtgccggttctgctgtcagcccgtaccgaaaccgccctggcggcacaggcacgtctgctggaatctgcggtcgatgacagtgtgccgctgaccgcactggctagtgcgctggccaccggtcgtgcccatctgccgcgtcgcgcagctctgctggccggcgatcacgaaGGACTTCTGGCCGCTTTGTCCGCCGTAGCCCAAGGCCAGACACCTCCGGGAGCCGCGCGCTGCATCGCGAGTTCCTCACGT
	F23	gcggtaccaacgcacatgtgattattgctgaaccgccggaaccggaaccgctgccggaaccgggtccggttggcgtcctggccgcagctaattccgtgccggttctgctgtcagcccgtaccgaaaccgccctggcggcacaggcacgtctgctggaatctgcggtcgatgacagtgtgccgctgaccgcactggctagtgcgctggccaccggtcgtgcccatctgccgcgtcgcgcagctctgctggccggcgatCGCGAAGGACTTCTGGCCGCTTTGTCCGCCGTAGCCCAAGGCCAGACACCTCCGGGAGCCGCGCGCTGCATCGCGAGTTCCTCACGT
	F24	gcggtaccaacgcacatgtgattattgctgaaccgccggaaccggaaccgctgccggaaccgggtccggttggcgtcctggccgcagctaattccgtgccggttctgctgtcagcccgtaccgaaaccgccctggcggcacaggcacgtctgctggaatctgcggtcgatgacagtgtgccgctgaccgcactggctagtgcgctggccaccggtcgtgcccatctgccgcgtcgcgcagctctgctggccggcTCGCGCGAAGGACTTCTGGCCGCTTTGTCCGCCGTAGCCCAAGGCCAGACACCTCCGGGAGCCGCGCGCTGCATCGCGAGTTCCTCACGT
	F25	gcggtaccaacgcacatgtgattattgctgaaccgccggaaccggaaccgctgccggaaccgggtccggttggcgtcctggccgcagctaattccgtgccggttctgctgtcagcccgtaccgaaaccgccctggcggcacaggcacgtctgctggaatctgcggtcgatgacagtgtgccgctgaccgcactggctagtgcgctggccaccggtcgtgcccatctgccgcgtcgcgcagctctgctggccACATCGCGCGAAGGACTTCTGGCCGCTTTGTCCGCCGTAGCCCAAGGCCAGACACCTCCGGGAGCCGCGCGCTGCATCGCGAGTTCCTCACGT
	F26	gcggtaccaacgcacatgtgattattgctgaaccgccggaaccggaaccgctgccggaaccgggtccggttggcgtcctggccgcagctaattccgtgccggttctgctgtcagcccgtaccgaaaccgccctggcggcacaggcacgtctgctggaatctgcggtcgatgacagtgtgccgctgaccgcactggctagtgcgctggccaccggtcgtgcccatctgccgcgtcgcgcagctctgctgGTCACATCGCGCGAAGGACTTCTGGCCGCTTTGTCCGCCGTAGCCCAAGGCCAGACACCTCCGGGAGCCGCGCGCTGCATCGCGAGTTCCTCACGT
	F27	gcggtaccaacgcacatgtgattattgctgaaccgccggaaccggaaccgctgccggaaccgggtccggttggcgtcctggccgcagctaattccgtgccggttctgctgtcagcccgtaccgaaaccgccctggcggcacaggcacgtctgctggaatctgcggtcgatgacagtgtgccgctgaccgcactggctagtgcgctggccaccggtcgtgcccatctgccgcgtcgcgcagctctgGCTGTCACATCGCGCGAAGGACTTCTGGCCGCTTTGTCCGCCGTAGCCCAAGGCCAGACACCTCCGGGAGCCGCGCGCTGCATCGCGAGTTCCTCACGT
	F28	gcggtaccaacgcacatgtgattattgctgaaccgccggaaccggaaccgctgccggaaccgggtccggttggcgtcctggccgcagctaattccgtgccggttctgctgtcagcccgtaccgaaaccgccctggcggcacaggcacgtctgctggaatctgcggtcgatgacagtgtgccgctgaccgcactggctagtgcgctggccaccggtcgtgcccatctgccgcgtcgcgcagctGTAGCTGTCACATCGCGCGAAGGACTTCTGGCCGCTTTGTCCGCCGTAGCCCAAGGCCAGACACCTCCGGGAGCCGCGCGCTGCATCGCGAGTTCCTCACGT
	F30	gcggtaccaacgcacatgtgattattgctgaaccgccggaaccggaaccgctgccggaaccgggtccggttggcgtcctggccgcagctaattccgtgccggttctgctgtcagcccgtaccgaaaccgccctggcggcacaggcacgtctgctggaatctgcggtcgatgacagtgtgccgctgaccgcactggctagtgcgctggccaccggtcgtgcccatctgccgcgtcgcTTAGCGGTAGCTGTCACATCGCGCGAAGGACTTCTGGCCGCTTTGTCCGCCGTAGCCCAAGGCCAGACACCTCCGGGAGCCGCGCGCTGCATCGCGAGTTCCTCACGT
	F32	gcggtaccaacgcacatgtgattattgctgaaccgccggaaccggaaccgctgccggaaccgggtccggttggcgtcctggccgcagctaattccgtgccggttctgctgtcagcccgtaccgaaaccgccctggcggcacaggcacgtctgctggaatctgcggtcgatgacagtgtgccgctgaccgcactggctagtgcgctggccaccggtcgtgcccatctgccgCACCGTTTAGCGGTAGCTGTCACATCGCGCGAAGGACTTCTGGCCGCTTTGTCCGCCGTAGCCCAAGGCCAGACACCTCCGGGAGCCGCGCGCTGCATCGCGAGTTCCTCACGT
	F33	gcggtaccaacgcacatgtgattattgctgaaccgccggaaccggaaccgctgccggaaccgggtccggttggcgtcctggccgcagctaattccgtgccggttctgctgtcagcccgtaccgaaaccgccctggcggcacaggcacgtctgctggaatctgcggtcgatgacagtgtgccgctgaccgcactggctagtgcgctggccaccggtcgtgcccatctgAACCACCGTTTAGCGGTAGCTGTCACATCGCGCGAAGGACTTCTGGCCGCTTTGTCCGCCGTAGCCCAAGGCCAGACACCTCCGGGAGCCGCGCGCTGCATCGCGAGTTCCTCACGT
	F34	gcggtaccaacgcacatgtgattattgctgaaccgccggaaccggaaccgctgccggaaccgggtccggttggcgtcctggccgcagctaattccgtgccggttctgctgtcagcccgtaccgaaaccgccctggcggcacaggcacgtctgctggaatctgcggtcgatgacagtgtgccgctgaccgcactggctagtgcgctggccaccggtcgtgcccatATGAACCACCGTTTAGCGGTAGCTGTCACATCGCGCGAAGGACTTCTGGCCGCTTTGTCCGCCGTAGCCCAAGGCCAGACACCTCCGGGAGCCGCGCGCTGCATCGCGAGTTCCTCACGT
	F35	gcggtaccaacgcacatgtgattattgctgaaccgccggaaccggaaccgctgccggaaccgggtccggttggcgtcctggccgcagctaattccgtgccggttctgctgtcagcccgtaccgaaaccgccctggcggcacaggcacgtctgctggaatctgcggtcgatgacagtgtgccgctgaccgcactggctagtgcgctggccaccggtcgtgccGCTATGAACCACCGTTTAGCGGTAGCTGTCACATCGCGCGAAGGACTTCTGGCCGCTTTGTCCGCCGTAGCCCAAGGCCAGACACCTCCGGGAGCCGCGCGCTGCATCGCGAGTTCCTCACGT
	F36	gcggtaccaacgcacatgtgattattgctgaaccgccggaaccggaaccgctgccggaaccgggtccggttggcgtcctggccgcagctaattccgtgccggttctgctgtcagcccgtaccgaaaccgccctggcggcacaggcacgtctgctggaatctgcggtcgatgacagtgtgccgctgaccgcactggctagtgcgctggccaccggtcgtTCAGCTATGAACCACCGTTTAGCGGTAGCTGTCACATCGCGCGAAGGACTTCTGGCCGCTTTGTCCGCCGTAGCCCAAGGCCAGACACCTCCGGGAGCCGCGCGCTGCATCGCGAGTTCCTCACGT
	F38	gcggtaccaacgcacatgtgattattgctgaaccgccggaaccggaaccgctgccggaaccgggtccggttggcgtcctggccgcagctaattccgtgccggttctgctgtcagcccgtaccgaaaccgccctggcggcacaggcacgtctgctggaatctgcggtcgatgacagtgtgccgctgaccgcactggctagtgcgctggccaccACCCGCTCAGCTATGAACCACCGTTTAGCGGTAGCTGTCACATCGCGCGAAGGACTTCTGGCCGCTTTGTCCGCCGTAGCCCAAGGCCAGACACCTCCGGGAGCCGCGCGCTGCATCGCGAGTTCCTCACGT
	F42	gcggtaccaacgcacatgtgattattgctgaaccgccggaaccggaaccgctgccggaaccgggtccggttggcgtcctggccgcagctaattccgtgccggttctgctgtcagcccgtaccgaaaccgccctggcggcacaggcacgtctgctggaatctgcggtcgatgacagtgtgccgctgaccgcactggctagtTCTCTGGCTACTACCCGCTCAGCTATGAACCACCGTTTAGCGGTAGCTGTCACATCGCGCGAAGGACTTCTGGCCGCTTTGTCCGCCGTAGCCCAAGGCCAGACACCTCCGGGAGCCGCGCGCTGCATCGCGAGTTCCTCACGT
	F43	gcggtaccaacgcacatgtgattattgctgaaccgccggaaccggaaccgctgccggaaccgggtccggttggcgtcctggccgcagctaattccgtgccggttctgctgtcagcccgtaccgaaaccgccctggcggcacaggcacgtctgctggaatctgcggtcgatgacagtgtgccgctgaccgcactggctTTCTCTCTGGCTACTACCCGCTCAGCTATGAACCACCGTTTAGCGGTAGCTGTCACATCGCGCGAAGGACTTCTGGCCGCTTTGTCCGCCGTAGCCCAAGGCCAGACACCTCCGGGAGCCGCGCGCTGCATCGCGAGTTCCTCACGT
	F45	gcggtaccaacgcacatgtgattattgctgaaccgccggaaccggaaccgctgccggaaccgggtccggttggcgtcctggccgcagctaattccgtgccggttctgctgtcagcccgtaccgaaaccgccctggcggcacaggcacgtctgctggaatctgcggtcgatgacagtgtgccgctgaccgcaGTGGCATTCTCTCTGGCTACTACCCGCTCAGCTATGAACCACCGTTTAGCGGTAGCTGTCACATCGCGCGAAGGACTTCTGGCCGCTTTGTCCGCCGTAGCCCAAGGCCAGACACCTCCGGGAGCCGCGCGCTGCATCGCGAGTTCCTCACGT
	F46	gcggtaccaacgcacatgtgattattgctgaaccgccggaaccggaaccgctgccggaaccgggtccggttggcgtcctggccgcagctaattccgtgccggttctgctgtcagcccgtaccgaaaccgccctggcggcacaggcacgtctgctggaatctgcggtcgatgacagtgtgccgctgaccGACGTGGCATTCTCTCTGGCTACTACCCGCTCAGCTATGAACCACCGTTTAGCGGTAGCTGTCACATCGCGCGAAGGACTTCTGGCCGCTTTGTCCGCCGTAGCCCAAGGCCAGACACCTCCGGGAGCCGCGCGCTGCATCGCGAGTTCCTCACGT
	F47	gcggtaccaacgcacatgtgattattgctgaaccgccggaaccggaaccgctgccggaaccgggtccggttggcgtcctggccgcagctaattccgtgccggttctgctgtcagcccgtaccgaaaccgccctggcggcacaggcacgtctgctggaatctgcggtcgatgacagtgtgccgctgGGGGACGTGGCATTCTCTCTGGCTACTACCCGCTCAGCTATGAACCACCGTTTAGCGGTAGCTGTCACATCGCGCGAAGGACTTCTGGCCGCTTTGTCCGCCGTAGCCCAAGGCCAGACACCTCCGGGAGCCGCGCGCTGCATCGCGAGTTCCTCACGT
	F49	gcggtaccaacgcacatgtgattattgctgaaccgccggaaccggaaccgctgccggaaccgggtccggttggcgtcctggccgcagctaattccgtgccggttctgctgtcagcccgtaccgaaaccgccctggcggcacaggcacgtctgctggaatctgcggtcgatgacagtgtgGGACTTGGGGACGTGGCATTCTCTCTGGCTACTACCCGCTCAGCTATGAACCACCGTTTAGCGGTAGCTGTCACATCGCGCGAAGGACTTCTGGCCGCTTTGTCCGCCGTAGCCCAAGGCCAGACACCTCCGGGAGCCGCGCGCTGCATCGCGAGTTCCTCACGT
	F50	gcggtaccaacgcacatgtgattattgctgaaccgccggaaccggaaccgctgccggaaccgggtccggttggcgtcctggccgcagctaattccgtgccggttctgctgtcagcccgtaccgaaaccgccctggcggcacaggcacgtctgctggaatctgcggtcgatgacagtCTGGGACTTGGGGACGTGGCATTCTCTCTGGCTACTACCCGCTCAGCTATGAACCACCGTTTAGCGGTAGCTGTCACATCGCGCGAAGGACTTCTGGCCGCTTTGTCCGCCGTAGCCCAAGGCCAGACACCTCCGGGAGCCGCGCGCTGCATCGCGAGTTCCTCACGT
	F51	gcggtaccaacgcacatgtgattattgctgaaccgccggaaccggaaccgctgccggaaccgggtccggttggcgtcctggccgcagctaattccgtgccggttctgctgtcagcccgtaccgaaaccgccctggcggcacaggcacgtctgctggaatctgcggtcgatgacGAGCTGGGACTTGGGGACGTGGCATTCTCTCTGGCTACTACCCGCTCAGCTATGAACCACCGTTTAGCGGTAGCTGTCACATCGCGCGAAGGACTTCTGGCCGCTTTGTCCGCCGTAGCCCAAGGCCAGACACCTCCGGGAGCCGCGCGCTGCATCGCGAGTTCCTCACGT
	F52	gcggtaccaacgcacatgtgattattgctgaaccgccggaaccggaaccgctgccggaaccgggtccggttggcgtcctggccgcagctaattccgtgccggttctgctgtcagcccgtaccgaaaccgccctggcggcacaggcacgtctgctggaatctgcggtcgatgacCCTGAGCTGGGACTTGGGGACGTGGCATTCTCTCTGGCTACTACCCGCTCAGCTATGAACCACCGTTTAGCGGTAGCTGTCACATCGCGCGAAGGACTTCTGGCCGCTTTGTCCGCCGTAGCCCAAGGCCAGACACCTCCGGGAGCCGCGCGCTGCATCGCGAGTTCCTCACGT
	F53	gcggtaccaacgcacatgtgattattgctgaaccgccggaaccggaaccgctgccggaaccgggtccggttggcgtcctggccgcagctaattccgtgccggttctgctgtcagcccgtaccgaaaccgccctggcggcacaggcacgtctgctggaatctgcggtcgatgacCACCCTGAGCTGGGACTTGGGGACGTGGCATTCTCTCTGGCTACTACCCGCTCAGCTATGAACCACCGTTTAGCGGTAGCTGTCACATCGCGCGAAGGACTTCTGGCCGCTTTGTCCGCCGTAGCCCAAGGCCAGACACCTCCGGGAGCCGCGCGCTGCATCGCGAGTTCCTCACGT
	F54	gcggtaccaacgcacatgtgattattgctgaaccgccggaaccggaaccgctgccggaaccgggtccggttggcgtcctggccgcagctaattccgtgccggttctgctgtcagcccgtaccgaaaccgccctggcggcacaggcacgtctgctggaatctgcggtcgatATGCACCCTGAGCTGGGACTTGGGGACGTGGCATTCTCTCTGGCTACTACCCGCTCAGCTATGAACCACCGTTTAGCGGTAGCTGTCACATCGCGCGAAGGACTTCTGGCCGCTTTGTCCGCCGTAGCCCAAGGCCAGACACCTCCGGGAGCCGCGCGCTGCATCGCGAGTTCCTCACGT
	F56	gcggtaccaacgcacatgtgattattgctgaaccgccggaaccggaaccgctgccggaaccgggtccggttggcgtcctggccgcagctaattccgtgccggttctgctgtcagcccgtaccgaaaccgccctggcggcacaggcacgtctgctggaatctgcgTTAGACATGCACCCTGAGCTGGGACTTGGGGACGTGGCATTCTCTCTGGCTACTACCCGCTCAGCTATGAACCACCGTTTAGCGGTAGCTGTCACATCGCGCGAAGGACTTCTGGCCGCTTTGTCCGCCGTAGCCCAAGGCCAGACACCTCCGGGAGCCGCGCGCTGCATCGCGAGTTCCTCACGT
	F57	gcggtaccaacgcacatgtgattattgctgaaccgccggaaccggaaccgctgccggaaccgggtccggttggcgtcctggccgcagctaattccgtgccggttctgctgtcagcccgtaccgaaaccgccctggcggcacaggcacgtctgctggaatctCACTTAGACATGCACCCTGAGCTGGGACTTGGGGACGTGGCATTCTCTCTGGCTACTACCCGCTCAGCTATGAACCACCGTTTAGCGGTAGCTGTCACATCGCGCGAAGGACTTCTGGCCGCTTTGTCCGCCGTAGCCCAAGGCCAGACACCTCCGGGAGCCGCGCGCTGCATCGCGAGTTCCTCACGT
	F58	gcggtaccaacgcacatgtgattattgctgaaccgccggaaccggaaccgctgccggaaccgggtccggttggcgtcctggccgcagctaattccgtgccggttctgctgtcagcccgtaccgaaaccgccctggcggcacaggcacgtctgctggaaGAGCACTTAGACATGCACCCTGAGCTGGGACTTGGGGACGTGGCATTCTCTCTGGCTACTACCCGCTCAGCTATGAACCACCGTTTAGCGGTAGCTGTCACATCGCGCGAAGGACTTCTGGCCGCTTTGTCCGCCGTAGCCCAAGGCCAGACACCTCCGGGAGCCGCGCGCTGCATCGCGAGTTCCTCACGT
	F59	gcggtaccaacgcacatgtgattattgctgaaccgccggaaccggaaccgctgccggaaccgggtccggttggcgtcctggccgcagctaattccgtgccggttctgctgtcagcccgtaccgaaaccgccctggcggcacaggcacgtctgctgCGCGAGCACTTAGACATGCACCCTGAGCTGGGACTTGGGGACGTGGCATTCTCTCTGGCTACTACCCGCTCAGCTATGAACCACCGTTTAGCGGTAGCTGTCACATCGCGCGAAGGACTTCTGGCCGCTTTGTCCGCCGTAGCCCAAGGCCAGACACCTCCGGGAGCCGCGCGCTGCATCGCGAGTTCCTCACGT
	F61	gcggtaccaacgcacatgtgattattgctgaaccgccggaaccggaaccgctgccggaaccgggtccggttggcgtcctggccgcagctaattccgtgccggttctgctgtcagcccgtaccgaaaccgccctggcggcacaggcacgtCGCTTACGCGAGCACTTAGACATGCACCCTGAGCTGGGACTTGGGGACGTGGCATTCTCTCTGGCTACTACCCGCTCAGCTATGAACCACCGTTTAGCGGTAGCTGTCACATCGCGCGAAGGACTTCTGGCCGCTTTGTCCGCCGTAGCCCAAGGCCAGACACCTCCGGGAGCCGCGCGCTGCATCGCGAGTTCCTCACGT
	F62	gcggtaccaacgcacatgtgattattgctgaaccgccggaaccggaaccgctgccggaaccgggtccggttggcgtcctggccgcagctaattccgtgccggttctgctgtcagcccgtaccgaaaccgccctggcggcacaggcaGCCCGCTTACGCGAGCACTTAGACATGCACCCTGAGCTGGGACTTGGGGACGTGGCATTCTCTCTGGCTACTACCCGCTCAGCTATGAACCACCGTTTAGCGGTAGCTGTCACATCGCGCGAAGGACTTCTGGCCGCTTTGTCCGCCGTAGCCCAAGGCCAGACACCTCCGGGAGCCGCGCGCTGCATCGCGAGTTCCTCACGT
	F66	gcggtaccaacgcacatgtgattattgctgaaccgccggaaccggaaccgctgccggaaccgggtccggttggcgtcctggccgcagctaattccgtgccggttctgctgtcagcccgtaccgaaaccgccctgGACGCTCAGGCAGCCCGCTTACGCGAGCACTTAGACATGCACCCTGAGCTGGGACTTGGGGACGTGGCATTCTCTCTGGCTACTACCCGCTCAGCTATGAACCACCGTTTAGCGGTAGCTGTCACATCGCGCGAAGGACTTCTGGCCGCTTTGTCCGCCGTAGCCCAAGGCCAGACACCTCCGGGAGCCGCGCGCTGCATCGCGAGTTCCTCACGT
	F69	gcggtaccaacgcacatgtgattattgctgaaccgccggaaccggaaccgctgccggaaccgggtccggttggcgtcctggccgcagctaattccgtgccggttctgctgtcagcccgtaccgaaGGCGCTCTGGACGCTCAGGCAGCCCGCTTACGCGAGCACTTAGACATGCACCCTGAGCTGGGACTTGGGGACGTGGCATTCTCTCTGGCTACTACCCGCTCAGCTATGAACCACCGTTTAGCGGTAGCTGTCACATCGCGCGAAGGACTTCTGGCCGCTTTGTCCGCCGTAGCCCAAGGCCAGACACCTCCGGGAGCCGCGCGCTGCATCGCGAGTTCCTCACGT
	F71	gcggtaccaacgcacatgtgattattgctgaaccgccggaaccggaaccgctgccggaaccgggtccggttggcgtcctggccgcagctaattccgtgccggttctgctgtcagcccgtAGTGAGGGCGCTCTGGACGCTCAGGCAGCCCGCTTACGCGAGCACTTAGACATGCACCCTGAGCTGGGACTTGGGGACGTGGCATTCTCTCTGGCTACTACCCGCTCAGCTATGAACCACCGTTTAGCGGTAGCTGTCACATCGCGCGAAGGACTTCTGGCCGCTTTGTCCGCCGTAGCCCAAGGCCAGACACCTCCGGGAGCCGCGCGCTGCATCGCGAGTTCCTCACGT
	F72	gcggtaccaacgcacatgtgattattgctgaaccgccggaaccggaaccgctgccggaaccgggtccggttggcgtcctggccgcagctaattccgtgccggttctgctgtcagccAAGAGTGAGGGCGCTCTGGACGCTCAGGCAGCCCGCTTACGCGAGCACTTAGACATGCACCCTGAGCTGGGACTTGGGGACGTGGCATTCTCTCTGGCTACTACCCGCTCAGCTATGAACCACCGTTTAGCGGTAGCTGTCACATCGCGCGAAGGACTTCTGGCCGCTTTGTCCGCCGTAGCCCAAGGCCAGACACCTCCGGGAGCCGCGCGCTGCATCGCGAGTTCCTCACGT
	F73	gcggtaccaacgcacatgtgattattgctgaaccgccggaaccggaaccgctgccggaaccgggtccggttggcgtcctggccgcagctaattccgtgccggttctgctgtcaGGGAAGAGTGAGGGCGCTCTGGACGCTCAGGCAGCCCGCTTACGCGAGCACTTAGACATGCACCCTGAGCTGGGACTTGGGGACGTGGCATTCTCTCTGGCTACTACCCGCTCAGCTATGAACCACCGTTTAGCGGTAGCTGTCACATCGCGCGAAGGACTTCTGGCCGCTTTGTCCGCCGTAGCCCAAGGCCAGACACCTCCGGGAGCCGCGCGCTGCATCGCGAGTTCCTCACGT
	F76	gcggtaccaacgcacatgtgattattgctgaaccgccggaaccggaaccgctgccggaaccgggtccggttggcgtcctggccgcagctaattccgtgccggttGTCTTATCCGGGAAGAGTGAGGGCGCTCTGGACGCTCAGGCAGCCCGCTTACGCGAGCACTTAGACATGCACCCTGAGCTGGGACTTGGGGACGTGGCATTCTCTCTGGCTACTACCCGCTCAGCTATGAACCACCGTTTAGCGGTAGCTGTCACATCGCGCGAAGGACTTCTGGCCGCTTTGTCCGCCGTAGCCCAAGGCCAGACACCTCCGGGAGCCGCGCGCTGCATCGCGAGTTCCTCACGT
	F77	gcggtaccaacgcacatgtgattattgctgaaccgccggaaccggaaccgctgccggaaccgggtccggttggcgtcctggccgcagctaattccgtgccgTTGGTCTTATCCGGGAAGAGTGAGGGCGCTCTGGACGCTCAGGCAGCCCGCTTACGCGAGCACTTAGACATGCACCCTGAGCTGGGACTTGGGGACGTGGCATTCTCTCTGGCTACTACCCGCTCAGCTATGAACCACCGTTTAGCGGTAGCTGTCACATCGCGCGAAGGACTTCTGGCCGCTTTGTCCGCCGTAGCCCAAGGCCAGACACCTCCGGGAGCCGCGCGCTGCATCGCGAGTTCCTCACGT
	F78	gcggtaccaacgcacatgtgattattgctgaaccgccggaaccggaaccgctgccggaaccgggtccggttggcgtcctggccgcagctaattccgtgCTGTTGGTCTTATCCGGGAAGAGTGAGGGCGCTCTGGACGCTCAGGCAGCCCGCTTACGCGAGCACTTAGACATGCACCCTGAGCTGGGACTTGGGGACGTGGCATTCTCTCTGGCTACTACCCGCTCAGCTATGAACCACCGTTTAGCGGTAGCTGTCACATCGCGCGAAGGACTTCTGGCCGCTTTGTCCGCCGTAGCCCAAGGCCAGACACCTCCGGGAGCCGCGCGCTGCATCGCGAGTTCCTCACGT
	F79	gcggtaccaacgcacatgtgattattgctgaaccgccggaaccggaaccgctgccggaaccgggtccggttggcgtcctggccgcagctaattccGAGCTGTTGGTCTTATCCGGGAAGAGTGAGGGCGCTCTGGACGCTCAGGCAGCCCGCTTACGCGAGCACTTAGACATGCACCCTGAGCTGGGACTTGGGGACGTGGCATTCTCTCTGGCTACTACCCGCTCAGCTATGAACCACCGTTTAGCGGTAGCTGTCACATCGCGCGAAGGACTTCTGGCCGCTTTGTCCGCCGTAGCCCAAGGCCAGACACCTCCGGGAGCCGCGCGCTGCATCGCGAGTTCCTCACGT
	F80	gcggtaccaacgcacatgtgattattgctgaaccgccggaaccggaaccgctgccggaaccgggtccggttggcgtcctggccgcagctaatGCGGAGCTGTTGGTCTTATCCGGGAAGAGTGAGGGCGCTCTGGACGCTCAGGCAGCCCGCTTACGCGAGCACTTAGACATGCACCCTGAGCTGGGACTTGGGGACGTGGCATTCTCTCTGGCTACTACCCGCTCAGCTATGAACCACCGTTTAGCGGTAGCTGTCACATCGCGCGAAGGACTTCTGGCCGCTTTGTCCGCCGTAGCCCAAGGCCAGACACCTCCGGGAGCCGCGCGCTGCATCGCGAGTTCCTCACGT
	F81	gcggtaccaacgcacatgtgattattgctgaaccgccggaaccggaaccgctgccggaaccgggtccggttggcgtcctggccgcagctAGCGCGGAGCTGTTGGTCTTATCCGGGAAGAGTGAGGGCGCTCTGGACGCTCAGGCAGCCCGCTTACGCGAGCACTTAGACATGCACCCTGAGCTGGGACTTGGGGACGTGGCATTCTCTCTGGCTACTACCCGCTCAGCTATGAACCACCGTTTAGCGGTAGCTGTCACATCGCGCGAAGGACTTCTGGCCGCTTTGTCCGCCGTAGCCCAAGGCCAGACACCTCCGGGAGCCGCGCGCTGCATCGCGAGTTCCTCACGT
	F82	gcggtaccaacgcacatgtgattattgctgaaccgccggaaccggaaccgctgccggaaccgggtccggttggcgtcctggccgcaCGCAGCGCGGAGCTGTTGGTCTTATCCGGGAAGAGTGAGGGCGCTCTGGACGCTCAGGCAGCCCGCTTACGCGAGCACTTAGACATGCACCCTGAGCTGGGACTTGGGGACGTGGCATTCTCTCTGGCTACTACCCGCTCAGCTATGAACCACCGTTTAGCGGTAGCTGTCACATCGCGCGAAGGACTTCTGGCCGCTTTGTCCGCCGTAGCCCAAGGCCAGACACCTCCGGGAGCCGCGCGCTGCATCGCGAGTTCCTCACGT
	F83	gcggtaccaacgcacatgtgattattgctgaaccgccggaaccggaaccgctgccggaaccgggtccggttggcgtcctggccGAACGCAGCGCGGAGCTGTTGGTCTTATCCGGGAAGAGTGAGGGCGCTCTGGACGCTCAGGCAGCCCGCTTACGCGAGCACTTAGACATGCACCCTGAGCTGGGACTTGGGGACGTGGCATTCTCTCTGGCTACTACCCGCTCAGCTATGAACCACCGTTTAGCGGTAGCTGTCACATCGCGCGAAGGACTTCTGGCCGCTTTGTCCGCCGTAGCCCAAGGCCAGACACCTCCGGGAGCCGCGCGCTGCATCGCGAGTTCCTCACGT
	F84	gcggtaccaacgcacatgtgattattgctgaaccgccggaaccggaaccgctgccggaaccgggtccggttggcgtcctgGAACGCAGCGCGGAGCTGTTGGTCTTATCCGGGAAGAGTGAGGGCGCTCTGGACGCTCAGGCAGCCCGCTTACGCGAGCACTTAGACATGCACCCTGAGCTGGGACTTGGGGACGTGGCATTCTCTCTGGCTACTACCCGCTCAGCTATGAACCACCGTTTAGCGGTAGCTGTCACATCGCGCGAAGGACTTCTGGCCGCTTTGTCCGCCGTAGCCCAAGGCCAGACACCTCCGGGAGCCGCGCGCTGCATCGCGAGTTCCTCACGT
	F85	gcggtaccaacgcacatgtgattattgctgaaccgccggaaccggaaccgctgccggaaccgggtccggttggcgtcGAACGCAGCGCGGAGCTGTTGGTCTTATCCGGGAAGAGTGAGGGCGCTCTGGACGCTCAGGCAGCCCGCTTACGCGAGCACTTAGACATGCACCCTGAGCTGGGACTTGGGGACGTGGCATTCTCTCTGGCTACTACCCGCTCAGCTATGAACCACCGTTTAGCGGTAGCTGTCACATCGCGCGAAGGACTTCTGGCCGCTTTGTCCGCCGTAGCCCAAGGCCAGACACCTCCGGGAGCCGCGCGCTGCATCGCGAGTTCCTCACGT
	F86	gcggtaccaacgcacatgtgattattgctgaaccgccggaaccggaaccgctgccggaaccgggtccggttggcGAACGCAGCGCGGAGCTGTTGGTCTTATCCGGGAAGAGTGAGGGCGCTCTGGACGCTCAGGCAGCCCGCTTACGCGAGCACTTAGACATGCACCCTGAGCTGGGACTTGGGGACGTGGCATTCTCTCTGGCTACTACCCGCTCAGCTATGAACCACCGTTTAGCGGTAGCTGTCACATCGCGCGAAGGACTTCTGGCCGCTTTGTCCGCCGTAGCCCAAGGCCAGACACCTCCGGGAGCCGCGCGCTGCATCGCGAGTTCCTCACGT
	F87	gcggtaccaacgcacatgtgattattgctgaaccgccggaaccggaaccgctgccggaaccgggtccggttGAACGCAGCGCGGAGCTGTTGGTCTTATCCGGGAAGAGTGAGGGCGCTCTGGACGCTCAGGCAGCCCGCTTACGCGAGCACTTAGACATGCACCCTGAGCTGGGACTTGGGGACGTGGCATTCTCTCTGGCTACTACCCGCTCAGCTATGAACCACCGTTTAGCGGTAGCTGTCACATCGCGCGAAGGACTTCTGGCCGCTTTGTCCGCCGTAGCCCAAGGCCAGACACCTCCGGGAGCCGCGCGCTGCATCGCGAGTTCCTCACGT
	F88	gcggtaccaacgcacatgtgattattgctgaaccgccggaaccggaaccgctgccggaaccgggtccgGAACGCAGCGCGGAGCTGTTGGTCTTATCCGGGAAGAGTGAGGGCGCTCTGGACGCTCAGGCAGCCCGCTTACGCGAGCACTTAGACATGCACCCTGAGCTGGGACTTGGGGACGTGGCATTCTCTCTGGCTACTACCCGCTCAGCTATGAACCACCGTTTAGCGGTAGCTGTCACATCGCGCGAAGGACTTCTGGCCGCTTTGTCCGCCGTAGCCCAAGGCCAGACACCTCCGGGAGCCGCGCGCTGCATCGCGAGTTCCTCACGT
	F89	gcggtaccaacgcacatgtgattattgctgaaccgccggaaccggaaccgctgccggaaccgggtGAACGCAGCGCGGAGCTGTTGGTCTTATCCGGGAAGAGTGAGGGCGCTCTGGACGCTCAGGCAGCCCGCTTACGCGAGCACTTAGACATGCACCCTGAGCTGGGACTTGGGGACGTGGCATTCTCTCTGGCTACTACCCGCTCAGCTATGAACCACCGTTTAGCGGTAGCTGTCACATCGCGCGAAGGACTTCTGGCCGCTTTGTCCGCCGTAGCCCAAGGCCAGACACCTCCGGGAGCCGCGCGCTGCATCGCGAGTTCCTCACGT
	F90	gcggtaccaacgcacatgtgattattgctgaaccgccggaaccggaaccgctgccggaaccgCCAGAACGCAGCGCGGAGCTGTTGGTCTTATCCGGGAAGAGTGAGGGCGCTCTGGACGCTCAGGCAGCCCGCTTACGCGAGCACTTAGACATGCACCCTGAGCTGGGACTTGGGGACGTGGCATTCTCTCTGGCTACTACCCGCTCAGCTATGAACCACCGTTTAGCGGTAGCTGTCACATCGCGCGAAGGACTTCTGGCCGCTTTGTCCGCCGTAGCCCAAGGCCAGACACCTCCGGGAGCCGCGCGCTGCATCGCGAGTTCCTCACGT
	F91	gcggtaccaacgcacatgtgattattgctgaaccgccggaaccggaaccgctgccggaaGCACCAGAACGCAGCGCGGAGCTGTTGGTCTTATCCGGGAAGAGTGAGGGCGCTCTGGACGCTCAGGCAGCCCGCTTACGCGAGCACTTAGACATGCACCCTGAGCTGGGACTTGGGGACGTGGCATTCTCTCTGGCTACTACCCGCTCAGCTATGAACCACCGTTTAGCGGTAGCTGTCACATCGCGCGAAGGACTTCTGGCCGCTTTGTCCGCCGTAGCCCAAGGCCAGACACCTCCGGGAGCCGCGCGCTGCATCGCGAGTTCCTCACGT
	F92	gcggtaccaacgcacatgtgattattgctgaaccgccggaaccggaaccgctgccgGCCGCACCAGAACGCAGCGCGGAGCTGTTGGTCTTATCCGGGAAGAGTGAGGGCGCTCTGGACGCTCAGGCAGCCCGCTTACGCGAGCACTTAGACATGCACCCTGAGCTGGGACTTGGGGACGTGGCATTCTCTCTGGCTACTACCCGCTCAGCTATGAACCACCGTTTAGCGGTAGCTGTCACATCGCGCGAAGGACTTCTGGCCGCTTTGTCCGCCGTAGCCCAAGGCCAGACACCTCCGGGAGCCGCGCGCTGCATCGCGAGTTCCTCACGT
	F94	gcggtaccaacgcacatgtgattattgctgaaccgccggaaccggaaccgTGGCCAGCCGCACCAGAACGCAGCGCGGAGCTGTTGGTCTTATCCGGGAAGAGTGAGGGCGCTCTGGACGCTCAGGCAGCCCGCTTACGCGAGCACTTAGACATGCACCCTGAGCTGGGACTTGGGGACGTGGCATTCTCTCTGGCTACTACCCGCTCAGCTATGAACCACCGTTTAGCGGTAGCTGTCACATCGCGCGAAGGACTTCTGGCCGCTTTGTCCGCCGTAGCCCAAGGCCAGACACCTCCGGGAGCCGCGCGCTGCATCGCGAGTTCCTCACGT
	F95	gcggtaccaacgcacatgtgattattgctgaaccgccggaaccggaaTTGTGGCCAGCCGCACCAGAACGCAGCGCGGAGCTGTTGGTCTTATCCGGGAAGAGTGAGGGCGCTCTGGACGCTCAGGCAGCCCGCTTACGCGAGCACTTAGACATGCACCCTGAGCTGGGACTTGGGGACGTGGCATTCTCTCTGGCTACTACCCGCTCAGCTATGAACCACCGTTTAGCGGTAGCTGTCACATCGCGCGAAGGACTTCTGGCCGCTTTGTCCGCCGTAGCCCAAGGCCAGACACCTCCGGGAGCCGCGCGCTGCATCGCGAGTTCCTCACGT
	F97	gcggtaccaacgcacatgtgattattgctgaaccgccggaaGTGGAATTGTGGCCAGCCGCACCAGAACGCAGCGCGGAGCTGTTGGTCTTATCCGGGAAGAGTGAGGGCGCTCTGGACGCTCAGGCAGCCCGCTTACGCGAGCACTTAGACATGCACCCTGAGCTGGGACTTGGGGACGTGGCATTCTCTCTGGCTACTACCCGCTCAGCTATGAACCACCGTTTAGCGGTAGCTGTCACATCGCGCGAAGGACTTCTGGCCGCTTTGTCCGCCGTAGCCCAAGGCCAGACACCTCCGGGAGCCGCGCGCTGCATCGCGAGTTCCTCACGT
	F98	gcggtaccaacgcacatgtgattattgctgaaccgccgGCGGTGGAATTGTGGCCAGCCGCACCAGAACGCAGCGCGGAGCTGTTGGTCTTATCCGGGAAGAGTGAGGGCGCTCTGGACGCTCAGGCAGCCCGCTTACGCGAGCACTTAGACATGCACCCTGAGCTGGGACTTGGGGACGTGGCATTCTCTCTGGCTACTACCCGCTCAGCTATGAACCACCGTTTAGCGGTAGCTGTCACATCGCGCGAAGGACTTCTGGCCGCTTTGTCCGCCGTAGCCCAAGGCCAGACACCTCCGGGAGCCGCGCGCTGCATCGCGAGTTCCTCACGT
	F100	gcggtaccaacgcacatgtgattattgctgaaGCCCCGGCGGTGGAATTGTGGCCAGCCGCACCAGAACGCAGCGCGGAGCTGTTGGTCTTATCCGGGAAGAGTGAGGGCGCTCTGGACGCTCAGGCAGCCCGCTTACGCGAGCACTTAGACATGCACCCTGAGCTGGGACTTGGGGACGTGGCATTCTCTCTGGCTACTACCCGCTCAGCTATGAACCACCGTTTAGCGGTAGCTGTCACATCGCGCGAAGGACTTCTGGCCGCTTTGTCCGCCGTAGCCCAAGGCCAGACACCTCCGGGAGCCGCGCGCTGCATCGCGAGTTCCTCACGT
	F102	gcggtaccaacgcacatgtgattattGAAGAGGCCCCGGCGGTGGAATTGTGGCCAGCCGCACCAGAACGCAGCGCGGAGCTGTTGGTCTTATCCGGGAAGAGTGAGGGCGCTCTGGACGCTCAGGCAGCCCGCTTACGCGAGCACTTAGACATGCACCCTGAGCTGGGACTTGGGGACGTGGCATTCTCTCTGGCTACTACCCGCTCAGCTATGAACCACCGTTTAGCGGTAGCTGTCACATCGCGCGAAGGACTTCTGGCCGCTTTGTCCGCCGTAGCCCAAGGCCAGACACCTCCGGGAGCCGCGCGCTGCATCGCGAGTTCCTCACGT
	F103	gcggtaccaacgcacatgtgattTTAGAAGAGGCCCCGGCGGTGGAATTGTGGCCAGCCGCACCAGAACGCAGCGCGGAGCTGTTGGTCTTATCCGGGAAGAGTGAGGGCGCTCTGGACGCTCAGGCAGCCCGCTTACGCGAGCACTTAGACATGCACCCTGAGCTGGGACTTGGGGACGTGGCATTCTCTCTGGCTACTACCCGCTCAGCTATGAACCACCGTTTAGCGGTAGCTGTCACATCGCGCGAAGGACTTCTGGCCGCTTTGTCCGCCGTAGCCCAAGGCCAGACACCTCCGGGAGCCGCGCGCTGCATCGCGAGTTCCTCACGT
	F104	gcggtaccaacgcacatgtgGTTTTAGAAGAGGCCCCGGCGGTGGAATTGTGGCCAGCCGCACCAGAACGCAGCGCGGAGCTGTTGGTCTTATCCGGGAAGAGTGAGGGCGCTCTGGACGCTCAGGCAGCCCGCTTACGCGAGCACTTAGACATGCACCCTGAGCTGGGACTTGGGGACGTGGCATTCTCTCTGGCTACTACCCGCTCAGCTATGAACCACCGTTTAGCGGTAGCTGTCACATCGCGCGAAGGACTTCTGGCCGCTTTGTCCGCCGTAGCCCAAGGCCAGACACCTCCGGGAGCCGCGCGCTGCATCGCGAGTTCCTCACGT
	R01	ggctttccggtgcggatccaatgcaccagaaaaccgccttccagatccaccggcgtggtggccagcgggcgccaatcaacacgatagcgggagtcagccagttgatcgctcacttccggtgccagccagtagcgctgcggttcgaacggataattcggcaggtcgaccggcggtgccgccgggaaaacattgcgccaatcgacggcaacaccatgcacatgtgcacgggccagttccgcaatcagatgttcttctgcagtatcacggtgcagactaccgatagccacCGGTTCTGCTTCCGGTAAGCACG
	R02	ggctttccggtgcggatccaatgcaccagaaaaccgccttccagatccaccggcgtggtggccagcgggcgccaatcaacacgatagcgggagtcagccagttgatcgctcacttccggtgccagccagtagcgctgcggttcgaacggataattcggcaggtcgaccggcggtgccgccgggaaaacattgcgccaatcgacggcaacaccatgcacatgtgcacgggccagttccgcaatcagatgttcttctgcagtatcacggtgcagactaccgatagcGGTCGGTTCTGCTTCCGGTAAGCACG
	R03	ggctttccggtgcggatccaatgcaccagaaaaccgccttccagatccaccggcgtggtggccagcgggcgccaatcaacacgatagcgggagtcagccagttgatcgctcacttccggtgccagccagtagcgctgcggttcgaacggataattcggcaggtcgaccggcggtgccgccgggaaaacattgcgccaatcgacggcaacaccatgcacatgtgcacgggccagttccgcaatcagatgttcttctgcagtatcacggtgcagactaccgatCAAGGTCGGTTCTGCTTCCGGTAAGCACG
	R04	ggctttccggtgcggatccaatgcaccagaaaaccgccttccagatccaccggcgtggtggccagcgggcgccaatcaacacgatagcgggagtcagccagttgatcgctcacttccggtgccagccagtagcgctgcggttcgaacggataattcggcaggtcgaccggcggtgccgccgggaaaacattgcgccaatcgacggcaacaccatgcacatgtgcacgggccagttccgcaatcagatgttcttctgcagtatcacggtgcagactaccTAACAAGGTCGGTTCTGCTTCCGGTAAGCACG
	R05	ggctttccggtgcggatccaatgcaccagaaaaccgccttccagatccaccggcgtggtggccagcgggcgccaatcaacacgatagcgggagtcagccagttgatcgctcacttccggtgccagccagtagcgctgcggttcgaacggataattcggcaggtcgaccggcggtgccgccgggaaaacattgcgccaatcgacggcaacaccatgcacatgtgcacgggccagttccgcaatcagatgttcttctgcagtatcacggtgcagactTGCTAACAAGGTCGGTTCTGCTTCCGGTAAGCACG
	R08	ggctttccggtgcggatccaatgcaccagaaaaccgccttccagatccaccggcgtggtggccagcgggcgccaatcaacacgatagcgggagtcagccagttgatcgctcacttccggtgccagccagtagcgctgcggttcgaacggataattcggcaggtcgaccggcggtgccgccgggaaaacattgcgccaatcgacggcaacaccatgcacatgtgcacgggccagttccgcaatcagatgttcttctgcagtatcacgGCGCAGCGATGCTAACAAGGTCGGTTCTGCTTCCGGTAAGCACG
	R09	ggctttccggtgcggatccaatgcaccagaaaaccgccttccagatccaccggcgtggtggccagcgggcgccaatcaacacgatagcgggagtcagccagttgatcgctcacttccggtgccagccagtagcgctgcggttcgaacggataattcggcaggtcgaccggcggtgccgccgggaaaacattgcgccaatcgacggcaacaccatgcacatgtgcacgggccagttccgcaatcagatgttcttctgcagtatcGGCGCGCAGCGATGCTAACAAGGTCGGTTCTGCTTCCGGTAAGCACG
	R10	ggctttccggtgcggatccaatgcaccagaaaaccgccttccagatccaccggcgtggtggccagcgggcgccaatcaacacgatagcgggagtcagccagttgatcgctcacttccggtgccagccagtagcgctgcggttcgaacggataattcggcaggtcgaccggcggtgccgccgggaaaacattgcgccaatcgacggcaacaccatgcacatgtgcacgggccagttccgcaatcagatgttcttctgcagtTCCGGCGCGCAGCGATGCTAACAAGGTCGGTTCTGCTTCCGGTAAGCACG
	R11	ggctttccggtgcggatccaatgcaccagaaaaccgccttccagatccaccggcgtggtggccagcgggcgccaatcaacacgatagcgggagtcagccagttgatcgctcacttccggtgccagccagtagcgctgcggttcgaacggataattcggcaggtcgaccggcggtgccgccgggaaaacattgcgccaatcgacggcaacaccatgcacatgtgcacgggccagttccgcaatcagatgttcttctgcagtACGTCCGGCGCGCAGCGATGCTAACAAGGTCGGTTCTGCTTCCGGTAAGCACG
	R12	ggctttccggtgcggatccaatgcaccagaaaaccgccttccagatccaccggcgtggtggccagcgggcgccaatcaacacgatagcgggagtcagccagttgatcgctcacttccggtgccagccagtagcgctgcggttcgaacggataattcggcaggtcgaccggcggtgccgccgggaaaacattgcgccaatcgacggcaacaccatgcacatgtgcacgggccagttccgcaatcagatgttcttctgcTTCACGTCCGGCGCGCAGCGATGCTAACAAGGTCGGTTCTGCTTCCGGTAAGCACG
	R13	ggctttccggtgcggatccaatgcaccagaaaaccgccttccagatccaccggcgtggtggccagcgggcgccaatcaacacgatagcgggagtcagccagttgatcgctcacttccggtgccagccagtagcgctgcggttcgaacggataattcggcaggtcgaccggcggtgccgccgggaaaacattgcgccaatcgacggcaacaccatgcacatgtgcacgggccagttccgcaatcagatgttcttcTTCTTCACGTCCGGCGCGCAGCGATGCTAACAAGGTCGGTTCTGCTTCCGGTAAGCACG
	R14	ggctttccggtgcggatccaatgcaccagaaaaccgccttccagatccaccggcgtggtggccagcgggcgccaatcaacacgatagcgggagtcagccagttgatcgctcacttccggtgccagccagtagcgctgcggttcgaacggataattcggcaggtcgaccggcggtgccgccgggaaaacattgcgccaatcgacggcaacaccatgcacatgtgcacgggccagttccgcaatcagatgttcTGCTTCTTCACGTCCGGCGCGCAGCGATGCTAACAAGGTCGGTTCTGCTTCCGGTAAGCACG
	R15	ggctttccggtgcggatccaatgcaccagaaaaccgccttccagatccaccggcgtggtggccagcgggcgccaatcaacacgatagcgggagtcagccagttgatcgctcacttccggtgccagccagtagcgctgcggttcgaacggataattcggcaggtcgaccggcggtgccgccgggaaaacattgcgccaatcgacggcaacaccatgcacatgtgcacgggccagttccgcaatcagatgTGCTGCTTCTTCACGTCCGGCGCGCAGCGATGCTAACAAGGTCGGTTCTGCTTCCGGTAAGCACG
	R16	ggctttccggtgcggatccaatgcaccagaaaaccgccttccagatccaccggcgtggtggccagcgggcgccaatcaacacgatagcgggagtcagccagttgatcgctcacttccggtgccagccagtagcgctgcggttcgaacggataattcggcaggtcgaccggcggtgccgccgggaaaacattgcgccaatcgacggcaacaccatgcacatgtgcacgggccagttccgcaatcagTCCTGCTGCTTCTTCACGTCCGGCGCGCAGCGATGCTAACAAGGTCGGTTCTGCTTCCGGTAAGCACG
	R17	ggctttccggtgcggatccaatgcaccagaaaaccgccttccagatccaccggcgtggtggccagcgggcgccaatcaacacgatagcgggagtcagccagttgatcgctcacttccggtgccagccagtagcgctgcggttcgaacggataattcggcaggtcgaccggcggtgccgccgggaaaacattgcgccaatcgacggcaacaccatgcacatgtgcacgggccagttccgcaatCACTCCTGCTGCTTCTTCACGTCCGGCGCGCAGCGATGCTAACAAGGTCGGTTCTGCTTCCGGTAAGCACG
	R18	ggctttccggtgcggatccaatgcaccagaaaaccgccttccagatccaccggcgtggtggccagcgggcgccaatcaacacgatagcgggagtcagccagttgatcgctcacttccggtgccagccagtagcgctgcggttcgaacggataattcggcaggtcgaccggcggtgccgccgggaaaacattgcgccaatcgacggcaacaccatgcacatgtgcacgggccagttccgcCAACACTCCTGCTGCTTCTTCACGTCCGGCGCGCAGCGATGCTAACAAGGTCGGTTCTGCTTCCGGTAAGCACG
	R19	ggctttccggtgcggatccaatgcaccagaaaaccgccttccagatccaccggcgtggtggccagcgggcgccaatcaacacgatagcgggagtcagccagttgatcgctcacttccggtgccagccagtagcgctgcggttcgaacggataattcggcaggtcgaccggcggtgccgccgggaaaacattgcgccaatcgacggcaacaccatgcacatgtgcacgggccagttcTTCCAACACTCCTGCTGCTTCTTCACGTCCGGCGCGCAGCGATGCTAACAAGGTCGGTTCTGCTTCCGGTAAGCACG
	R20	ggctttccggtgcggatccaatgcaccagaaaaccgccttccagatccaccggcgtggtggccagcgggcgccaatcaacacgatagcgggagtcagccagttgatcgctcacttccggtgccagccagtagcgctgcggttcgaacggataattcggcaggtcgaccggcggtgccgccgggaaaacattgcgccaatcgacggcaacaccatgcacatgtgcacgggccagCGCTTCCAACACTCCTGCTGCTTCTTCACGTCCGGCGCGCAGCGATGCTAACAAGGTCGGTTCTGCTTCCGGTAAGCACG
	R22	ggctttccggtgcggatccaatgcaccagaaaaccgccttccagatccaccggcgtggtggccagcgggcgccaatcaacacgatagcgggagtcagccagttgatcgctcacttccggtgccagccagtagcgctgcggttcgaacggataattcggcaggtcgaccggcggtgccgccgggaaaacattgcgccaatcgacggcaacaccatgcacatgtgcacgGCCAAGCGCTTCCAACACTCCTGCTGCTTCTTCACGTCCGGCGCGCAGCGATGCTAACAAGGTCGGTTCTGCTTCCGGTAAGCACG
	R24	ggctttccggtgcggatccaatgcaccagaaaaccgccttccagatccaccggcgtggtggccagcgggcgccaatcaacacgatagcgggagtcagccagttgatcgctcacttccggtgccagccagtagcgctgcggttcgaacggataattcggcaggtcgaccggcggtgccgccgggaaaacattgcgccaatcgacggcaacaccatgcacatgCAAGCGGCCAAGCGCTTCCAACACTCCTGCTGCTTCTTCACGTCCGGCGCGCAGCGATGCTAACAAGGTCGGTTCTGCTTCCGGTAAGCACG
	R25	ggctttccggtgcggatccaatgcaccagaaaaccgccttccagatccaccggcgtggtggccagcgggcgccaatcaacacgatagcgggagtcagccagttgatcgctcacttccggtgccagccagtagcgctgcggttcgaacggataattcggcaggtcgaccggcggtgccgccgggaaaacattgcgccaatcgacggcaacaccatgcacCCACAAGCGGCCAAGCGCTTCCAACACTCCTGCTGCTTCTTCACGTCCGGCGCGCAGCGATGCTAACAAGGTCGGTTCTGCTTCCGGTAAGCACG
	R26	ggctttccggtgcggatccaatgcaccagaaaaccgccttccagatccaccggcgtggtggccagcgggcgccaatcaacacgatagcgggagtcagccagttgatcgctcacttccggtgccagccagtagcgctgcggttcgaacggataattcggcaggtcgaccggcggtgccgccgggaaaacattgcgccaatcgacggcaacaccatgTGCCCACAAGCGGCCAAGCGCTTCCAACACTCCTGCTGCTTCTTCACGTCCGGCGCGCAGCGATGCTAACAAGGTCGGTTCTGCTTCCGGTAAGCACG
	R27	ggctttccggtgcggatccaatgcaccagaaaaccgccttccagatccaccggcgtggtggccagcgggcgccaatcaacacgatagcgggagtcagccagttgatcgctcacttccggtgccagccagtagcgctgcggttcgaacggataattcggcaggtcgaccggcggtgccgccgggaaaacattgcgccaatcgacggcaacaccTGCTGCCCACAAGCGGCCAAGCGCTTCCAACACTCCTGCTGCTTCTTCACGTCCGGCGCGCAGCGATGCTAACAAGGTCGGTTCTGCTTCCGGTAAGCACG
	R29	ggctttccggtgcggatccaatgcaccagaaaaccgccttccagatccaccggcgtggtggccagcgggcgccaatcaacacgatagcgggagtcagccagttgatcgctcacttccggtgccagccagtagcgctgcggttcgaacggataattcggcaggtcgaccggcggtgccgccgggaaaacattgcgccaatcgacggcACCCCCTGCTGCCCACAAGCGGCCAAGCGCTTCCAACACTCCTGCTGCTTCTTCACGTCCGGCGCGCAGCGATGCTAACAAGGTCGGTTCTGCTTCCGGTAAGCACG
	R30	ggctttccggtgcggatccaatgcaccagaaaaccgccttccagatccaccggcgtggtggccagcgggcgccaatcaacacgatagcgggagtcagccagttgatcgctcacttccggtgccagccagtagcgctgcggttcgaacggataattcggcaggtcgaccggcggtgccgccgggaaaacattgcgccaatcgacGGAACCCCCTGCTGCCCACAAGCGGCCAAGCGCTTCCAACACTCCTGCTGCTTCTTCACGTCCGGCGCGCAGCGATGCTAACAAGGTCGGTTCTGCTTCCGGTAAGCACG
	R32	ggctttccggtgcggatccaatgcaccagaaaaccgccttccagatccaccggcgtggtggccagcgggcgccaatcaacacgatagcgggagtcagccagttgatcgctcacttccggtgccagccagtagcgctgcggttcgaacggataattcggcaggtcgaccggcggtgccgccgggaaaacattgcgccaGGATACGGAACCCCCTGCTGCCCACAAGCGGCCAAGCGCTTCCAACACTCCTGCTGCTTCTTCACGTCCGGCGCGCAGCGATGCTAACAAGGTCGGTTCTGCTTCCGGTAAGCACG
	R34	ggctttccggtgcggatccaatgcaccagaaaaccgccttccagatccaccggcgtggtggccagcgggcgccaatcaacacgatagcgggagtcagccagttgatcgctcacttccggtgccagccagtagcgctgcggttcgaacggataattcggcaggtcgaccggcggtgccgccgggaaaacattAGGCCAGGATACGGAACCCCCTGCTGCCCACAAGCGGCCAAGCGCTTCCAACACTCCTGCTGCTTCTTCACGTCCGGCGCGCAGCGATGCTAACAAGGTCGGTTCTGCTTCCGGTAAGCACG
	R35	ggctttccggtgcggatccaatgcaccagaaaaccgccttccagatccaccggcgtggtggccagcgggcgccaatcaacacgatagcgggagtcagccagttgatcgctcacttccggtgccagccagtagcgctgcggttcgaacggataattcggcaggtcgaccggcggtgccgccgggaaaacACCAGGCCAGGATACGGAACCCCCTGCTGCCCACAAGCGGCCAAGCGCTTCCAACACTCCTGCTGCTTCTTCACGTCCGGCGCGCAGCGATGCTAACAAGGTCGGTTCTGCTTCCGGTAAGCACG
	R39	ggctttccggtgcggatccaatgcaccagaaaaccgccttccagatccaccggcgtggtggccagcgggcgccaatcaacacgatagcgggagtcagccagttgatcgctcacttccggtgccagccagtagcgctgcggttcgaacggataattcggcaggtcgaccggcggtgcAGTTGGGAACACACCAGGCCAGGATACGGAACCCCCTGCTGCCCACAAGCGGCCAAGCGCTTCCAACACTCCTGCTGCTTCTTCACGTCCGGCGCGCAGCGATGCTAACAAGGTCGGTTCTGCTTCCGGTAAGCACG
	R41	ggctttccggtgcggatccaatgcaccagaaaaccgccttccagatccaccggcgtggtggccagcgggcgccaatcaacacgatagcgggagtcagccagttgatcgctcacttccggtgccagccagtagcgctgcggttcgaacggataattcggcaggtcgaccggcggACCGGCAGTTGGGAACACACCAGGCCAGGATACGGAACCCCCTGCTGCCCACAAGCGGCCAAGCGCTTCCAACACTCCTGCTGCTTCTTCACGTCCGGCGCGCAGCGATGCTAACAAGGTCGGTTCTGCTTCCGGTAAGCACG
	R42	ggctttccggtgcggatccaatgcaccagaaaaccgccttccagatccaccggcgtggtggccagcgggcgccaatcaacacgatagcgggagtcagccagttgatcgctcacttccggtgccagccagtagcgctgcggttcgaacggataattcggcaggtcgaccggGCGACCGGCAGTTGGGAACACACCAGGCCAGGATACGGAACCCCCTGCTGCCCACAAGCGGCCAAGCGCTTCCAACACTCCTGCTGCTTCTTCACGTCCGGCGCGCAGCGATGCTAACAAGGTCGGTTCTGCTTCCGGTAAGCACG
	R43	ggctttccggtgcggatccaatgcaccagaaaaccgccttccagatccaccggcgtggtggccagcgggcgccaatcaacacgatagcgggagtcagccagttgatcgctcacttccggtgccagccagtagcgctgcggttcgaacggataattcggcaggtcgacGCGGCGACCGGCAGTTGGGAACACACCAGGCCAGGATACGGAACCCCCTGCTGCCCACAAGCGGCCAAGCGCTTCCAACACTCCTGCTGCTTCTTCACGTCCGGCGCGCAGCGATGCTAACAAGGTCGGTTCTGCTTCCGGTAAGCACG
	R45	ggctttccggtgcggatccaatgcaccagaaaaccgccttccagatccaccggcgtggtggccagcgggcgccaatcaacacgatagcgggagtcagccagttgatcgctcacttccggtgccagccagtagcgctgcggttcgaacggataattcggcagAGGCACGCGGCGACCGGCAGTTGGGAACACACCAGGCCAGGATACGGAACCCCCTGCTGCCCACAAGCGGCCAAGCGCTTCCAACACTCCTGCTGCTTCTTCACGTCCGGCGCGCAGCGATGCTAACAAGGTCGGTTCTGCTTCCGGTAAGCACG
	R48	ggctttccggtgcggatccaatgcaccagaaaaccgccttccagatccaccggcgtggtggccagcgggcgccaatcaacacgatagcgggagtcagccagttgatcgctcacttccggtgccagccagtagcgctgcggttcgaacggataCGTAGGAAGAGGCACGCGGCGACCGGCAGTTGGGAACACACCAGGCCAGGATACGGAACCCCCTGCTGCCCACAAGCGGCCAAGCGCTTCCAACACTCCTGCTGCTTCTTCACGTCCGGCGCGCAGCGATGCTAACAAGGTCGGTTCTGCTTCCGGTAAGCACG
	R51	ggctttccggtgcggatccaatgcaccagaaaaccgccttccagatccaccggcgtggtggccagcgggcgccaatcaacacgatagcgggagtcagccagttgatcgctcacttccggtgccagccagtagcgctgcggttcCCAAGGGTACGTAGGAAGAGGCACGCGGCGACCGGCAGTTGGGAACACACCAGGCCAGGATACGGAACCCCCTGCTGCCCACAAGCGGCCAAGCGCTTCCAACACTCCTGCTGCTTCTTCACGTCCGGCGCGCAGCGATGCTAACAAGGTCGGTTCTGCTTCCGGTAAGCACG
	R52	ggctttccggtgcggatccaatgcaccagaaaaccgccttccagatccaccggcgtggtggccagcgggcgccaatcaacacgatagcgggagtcagccagttgatcgctcacttccggtgccagccagtagcgctgcggCTGCCAAGGGTACGTAGGAAGAGGCACGCGGCGACCGGCAGTTGGGAACACACCAGGCCAGGATACGGAACCCCCTGCTGCCCACAAGCGGCCAAGCGCTTCCAACACTCCTGCTGCTTCTTCACGTCCGGCGCGCAGCGATGCTAACAAGGTCGGTTCTGCTTCCGGTAAGCACG
	R53	ggctttccggtgcggatccaatgcaccagaaaaccgccttccagatccaccggcgtggtggccagcgggcgccaatcaacacgatagcgggagtcagccagttgatcgctcacttccggtgccagccagtagcgctgACGCTGCCAAGGGTACGTAGGAAGAGGCACGCGGCGACCGGCAGTTGGGAACACACCAGGCCAGGATACGGAACCCCCTGCTGCCCACAAGCGGCCAAGCGCTTCCAACACTCCTGCTGCTTCTTCACGTCCGGCGCGCAGCGATGCTAACAAGGTCGGTTCTGCTTCCGGTAAGCACG
	R58	ggctttccggtgcggatccaatgcaccagaaaaccgccttccagatccaccggcgtggtggccagcgggcgccaatcaacacgatagcgggagtcagccagttgatcgctcacttccggtgcGGGCCAATAACGCTGACGCTGCCAAGGGTACGTAGGAAGAGGCACGCGGCGACCGGCAGTTGGGAACACACCAGGCCAGGATACGGAACCCCCTGCTGCCCACAAGCGGCCAAGCGCTTCCAACACTCCTGCTGCTTCTTCACGTCCGGCGCGCAGCGATGCTAACAAGGTCGGTTCTGCTTCCGGTAAGCACG
	R59	ggctttccggtgcggatccaatgcaccagaaaaccgccttccagatccaccggcgtggtggccagcgggcgccaatcaacacgatagcgggagtcagccagttgatcgctcacttccggATCGGGCCAATAACGCTGACGCTGCCAAGGGTACGTAGGAAGAGGCACGCGGCGACCGGCAGTTGGGAACACACCAGGCCAGGATACGGAACCCCCTGCTGCCCACAAGCGGCCAAGCGCTTCCAACACTCCTGCTGCTTCTTCACGTCCGGCGCGCAGCGATGCTAACAAGGTCGGTTCTGCTTCCGGTAAGCACG
	R60	ggctttccggtgcggatccaatgcaccagaaaaccgccttccagatccaccggcgtggtggccagcgggcgccaatcaacacgatagcgggagtcagccagttgatcgctcacttcAATATCGGGCCAATAACGCTGACGCTGCCAAGGGTACGTAGGAAGAGGCACGCGGCGACCGGCAGTTGGGAACACACCAGGCCAGGATACGGAACCCCCTGCTGCCCACAAGCGGCCAAGCGCTTCCAACACTCCTGCTGCTTCTTCACGTCCGGCGCGCAGCGATGCTAACAAGGTCGGTTCTGCTTCCGGTAAGCACG
	R62	ggctttccggtgcggatccaatgcaccagaaaaccgccttccagatccaccggcgtggtggccagcgggcgccaatcaacacgatagcgggagtcagccagttgatcgctAGGCTCAATATCGGGCCAATAACGCTGACGCTGCCAAGGGTACGTAGGAAGAGGCACGCGGCGACCGGCAGTTGGGAACACACCAGGCCAGGATACGGAACCCCCTGCTGCCCACAAGCGGCCAAGCGCTTCCAACACTCCTGCTGCTTCTTCACGTCCGGCGCGCAGCGATGCTAACAAGGTCGGTTCTGCTTCCGGTAAGCACG
	R63	ggctttccggtgcggatccaatgcaccagaaaaccgccttccagatccaccggcgtggtggccagcgggcgccaatcaacacgatagcgggagtcagccagttgatcGTCAGGCTCAATATCGGGCCAATAACGCTGACGCTGCCAAGGGTACGTAGGAAGAGGCACGCGGCGACCGGCAGTTGGGAACACACCAGGCCAGGATACGGAACCCCCTGCTGCCCACAAGCGGCCAAGCGCTTCCAACACTCCTGCTGCTTCTTCACGTCCGGCGCGCAGCGATGCTAACAAGGTCGGTTCTGCTTCCGGTAAGCACG
	R64	ggctttccggtgcggatccaatgcaccagaaaaccgccttccagatccaccggcgtggtggccagcgggcgccaatcaacacgatagcgggagtcagccagttgTGAGTCAGGCTCAATATCGGGCCAATAACGCTGACGCTGCCAAGGGTACGTAGGAAGAGGCACGCGGCGACCGGCAGTTGGGAACACACCAGGCCAGGATACGGAACCCCCTGCTGCCCACAAGCGGCCAAGCGCTTCCAACACTCCTGCTGCTTCTTCACGTCCGGCGCGCAGCGATGCTAACAAGGTCGGTTCTGCTTCCGGTAAGCACG
	R65	ggctttccggtgcggatccaatgcaccagaaaaccgccttccagatccaccggcgtggtggccagcgggcgccaatcaacacgatagcgggagtcagccagttgACGTGAGTCAGGCTCAATATCGGGCCAATAACGCTGACGCTGCCAAGGGTACGTAGGAAGAGGCACGCGGCGACCGGCAGTTGGGAACACACCAGGCCAGGATACGGAACCCCCTGCTGCCCACAAGCGGCCAAGCGCTTCCAACACTCCTGCTGCTTCTTCACGTCCGGCGCGCAGCGATGCTAACAAGGTCGGTTCTGCTTCCGGTAAGCACG
	R66	ggctttccggtgcggatccaatgcaccagaaaaccgccttccagatccaccggcgtggtggccagcgggcgccaatcaacacgatagcgggagtcagccagttgACGACGTGAGTCAGGCTCAATATCGGGCCAATAACGCTGACGCTGCCAAGGGTACGTAGGAAGAGGCACGCGGCGACCGGCAGTTGGGAACACACCAGGCCAGGATACGGAACCCCCTGCTGCCCACAAGCGGCCAAGCGCTTCCAACACTCCTGCTGCTTCTTCACGTCCGGCGCGCAGCGATGCTAACAAGGTCGGTTCTGCTTCCGGTAAGCACG
	R67	ggctttccggtgcggatccaatgcaccagaaaaccgccttccagatccaccggcgtggtggccagcgggcgccaatcaacacgatagcgggagtcagccagttgGTGACGACGTGAGTCAGGCTCAATATCGGGCCAATAACGCTGACGCTGCCAAGGGTACGTAGGAAGAGGCACGCGGCGACCGGCAGTTGGGAACACACCAGGCCAGGATACGGAACCCCCTGCTGCCCACAAGCGGCCAAGCGCTTCCAACACTCCTGCTGCTTCTTCACGTCCGGCGCGCAGCGATGCTAACAAGGTCGGTTCTGCTTCCGGTAAGCACG
	R68	ggctttccggtgcggatccaatgcaccagaaaaccgccttccagatccaccggcgtggtggccagcgggcgccaatcaacacgatagcgggagtcagccagttgTGCGTGACGACGTGAGTCAGGCTCAATATCGGGCCAATAACGCTGACGCTGCCAAGGGTACGTAGGAAGAGGCACGCGGCGACCGGCAGTTGGGAACACACCAGGCCAGGATACGGAACCCCCTGCTGCCCACAAGCGGCCAAGCGCTTCCAACACTCCTGCTGCTTCTTCACGTCCGGCGCGCAGCGATGCTAACAAGGTCGGTTCTGCTTCCGGTAAGCACG
	R69	ggctttccggtgcggatccaatgcaccagaaaaccgccttccagatccaccggcgtggtggccagcgggcgccaatcaacacgatagcgggagtcagccagttgGGCTGCGTGACGACGTGAGTCAGGCTCAATATCGGGCCAATAACGCTGACGCTGCCAAGGGTACGTAGGAAGAGGCACGCGGCGACCGGCAGTTGGGAACACACCAGGCCAGGATACGGAACCCCCTGCTGCCCACAAGCGGCCAAGCGCTTCCAACACTCCTGCTGCTTCTTCACGTCCGGCGCGCAGCGATGCTAACAAGGTCGGTTCTGCTTCCGGTAAGCACG
	R70	ggctttccggtgcggatccaatgcaccagaaaaccgccttccagatccaccggcgtggtggccagcgggcgccaatcaacacgatagcgggagtcagccagttgGGCGGCTGCGTGACGACGTGAGTCAGGCTCAATATCGGGCCAATAACGCTGACGCTGCCAAGGGTACGTAGGAAGAGGCACGCGGCGACCGGCAGTTGGGAACACACCAGGCCAGGATACGGAACCCCCTGCTGCCCACAAGCGGCCAAGCGCTTCCAACACTCCTGCTGCTTCTTCACGTCCGGCGCGCAGCGATGCTAACAAGGTCGGTTCTGCTTCCGGTAAGCACG
	R71	ggctttccggtgcggatccaatgcaccagaaaaccgccttccagatccaccggcgtggtggccagcgggcgccaatcaacacgatagcgggagtcagccagttgATCGGCGGCTGCGTGACGACGTGAGTCAGGCTCAATATCGGGCCAATAACGCTGACGCTGCCAAGGGTACGTAGGAAGAGGCACGCGGCGACCGGCAGTTGGGAACACACCAGGCCAGGATACGGAACCCCCTGCTGCCCACAAGCGGCCAAGCGCTTCCAACACTCCTGCTGCTTCTTCACGTCCGGCGCGCAGCGATGCTAACAAGGTCGGTTCTGCTTCCGGTAAGCACG
	R72	ggctttccggtgcggatccaatgcaccagaaaaccgccttccagatccaccggcgtggtggccagcgggcgccaatcaacacgatagcgggagtcagccagTGGATCGGCGGCTGCGTGACGACGTGAGTCAGGCTCAATATCGGGCCAATAACGCTGACGCTGCCAAGGGTACGTAGGAAGAGGCACGCGGCGACCGGCAGTTGGGAACACACCAGGCCAGGATACGGAACCCCCTGCTGCCCACAAGCGGCCAAGCGCTTCCAACACTCCTGCTGCTTCTTCACGTCCGGCGCGCAGCGATGCTAACAAGGTCGGTTCTGCTTCCGGTAAGCACG
	R73	ggctttccggtgcggatccaatgcaccagaaaaccgccttccagatccaccggcgtggtggccagcgggcgccaatcaacacgatagcgggagtcagcGGTTGGATCGGCGGCTGCGTGACGACGTGAGTCAGGCTCAATATCGGGCCAATAACGCTGACGCTGCCAAGGGTACGTAGGAAGAGGCACGCGGCGACCGGCAGTTGGGAACACACCAGGCCAGGATACGGAACCCCCTGCTGCCCACAAGCGGCCAAGCGCTTCCAACACTCCTGCTGCTTCTTCACGTCCGGCGCGCAGCGATGCTAACAAGGTCGGTTCTGCTTCCGGTAAGCACG
	R74	ggctttccggtgcggatccaatgcaccagaaaaccgccttccagatccaccggcgtggtggccagcgggcgccaatcaacacgatagcgggagtcCTGGGTTGGATCGGCGGCTGCGTGACGACGTGAGTCAGGCTCAATATCGGGCCAATAACGCTGACGCTGCCAAGGGTACGTAGGAAGAGGCACGCGGCGACCGGCAGTTGGGAACACACCAGGCCAGGATACGGAACCCCCTGCTGCCCACAAGCGGCCAAGCGCTTCCAACACTCCTGCTGCTTCTTCACGTCCGGCGCGCAGCGATGCTAACAAGGTCGGTTCTGCTTCCGGTAAGCACG
	R75	ggctttccggtgcggatccaatgcaccagaaaaccgccttccagatccaccggcgtggtggccagcgggcgccaatcaacacgatagcgggaCCCCTGGGTTGGATCGGCGGCTGCGTGACGACGTGAGTCAGGCTCAATATCGGGCCAATAACGCTGACGCTGCCAAGGGTACGTAGGAAGAGGCACGCGGCGACCGGCAGTTGGGAACACACCAGGCCAGGATACGGAACCCCCTGCTGCCCACAAGCGGCCAAGCGCTTCCAACACTCCTGCTGCTTCTTCACGTCCGGCGCGCAGCGATGCTAACAAGGTCGGTTCTGCTTCCGGTAAGCACG
	R76	ggctttccggtgcggatccaatgcaccagaaaaccgccttccagatccaccggcgtggtggccagcgggcgccaatcaacacgatagcgCCACCCCTGGGTTGGATCGGCGGCTGCGTGACGACGTGAGTCAGGCTCAATATCGGGCCAATAACGCTGACGCTGCCAAGGGTACGTAGGAAGAGGCACGCGGCGACCGGCAGTTGGGAACACACCAGGCCAGGATACGGAACCCCCTGCTGCCCACAAGCGGCCAAGCGCTTCCAACACTCCTGCTGCTTCTTCACGTCCGGCGCGCAGCGATGCTAACAAGGTCGGTTCTGCTTCCGGTAAGCACG
	R77	ggctttccggtgcggatccaatgcaccagaaaaccgccttccagatccaccggcgtggtggccagcgggcgccaatcaacacgataGAACCACCCCTGGGTTGGATCGGCGGCTGCGTGACGACGTGAGTCAGGCTCAATATCGGGCCAATAACGCTGACGCTGCCAAGGGTACGTAGGAAGAGGCACGCGGCGACCGGCAGTTGGGAACACACCAGGCCAGGATACGGAACCCCCTGCTGCCCACAAGCGGCCAAGCGCTTCCAACACTCCTGCTGCTTCTTCACGTCCGGCGCGCAGCGATGCTAACAAGGTCGGTTCTGCTTCCGGTAAGCACG
	R83	ggctttccggtgcggatccaatgcaccagaaaaccgccttccagatccaccggcgtggtggccagcggCGGCCAGTCCACTCTGTAGAACCACCCCTGGGTTGGATCGGCGGCTGCGTGACGACGTGAGTCAGGCTCAATATCGGGCCAATAACGCTGACGCTGCCAAGGGTACGTAGGAAGAGGCACGCGGCGACCGGCAGTTGGGAACACACCAGGCCAGGATACGGAACCCCCTGCTGCCCACAAGCGGCCAAGCGCTTCCAACACTCCTGCTGCTTCTTCACGTCCGGCGCGCAGCGATGCTAACAAGGTCGGTTCTGCTTCCGGTAAGCACG
	R84	ggctttccggtgcggatccaatgcaccagaaaaccgccttccagatccaccggcgtggtggccagTTCCGGCCAGTCCACTCTGTAGAACCACCCCTGGGTTGGATCGGCGGCTGCGTGACGACGTGAGTCAGGCTCAATATCGGGCCAATAACGCTGACGCTGCCAAGGGTACGTAGGAAGAGGCACGCGGCGACCGGCAGTTGGGAACACACCAGGCCAGGATACGGAACCCCCTGCTGCCCACAAGCGGCCAAGCGCTTCCAACACTCCTGCTGCTTCTTCACGTCCGGCGCGCAGCGATGCTAACAAGGTCGGTTCTGCTTCCGGTAAGCACG
	R85	ggctttccggtgcggatccaatgcaccagaaaaccgccttccagatccaccggcgtggtggcGATTTCCGGCCAGTCCACTCTGTAGAACCACCCCTGGGTTGGATCGGCGGCTGCGTGACGACGTGAGTCAGGCTCAATATCGGGCCAATAACGCTGACGCTGCCAAGGGTACGTAGGAAGAGGCACGCGGCGACCGGCAGTTGGGAACACACCAGGCCAGGATACGGAACCCCCTGCTGCCCACAAGCGGCCAAGCGCTTCCAACACTCCTGCTGCTTCTTCACGTCCGGCGCGCAGCGATGCTAACAAGGTCGGTTCTGCTTCCGGTAAGCACG
	R86	ggctttccggtgcggatccaatgcaccagaaaaccgccttccagatccaccggcgtggtAGGGATTTCCGGCCAGTCCACTCTGTAGAACCACCCCTGGGTTGGATCGGCGGCTGCGTGACGACGTGAGTCAGGCTCAATATCGGGCCAATAACGCTGACGCTGCCAAGGGTACGTAGGAAGAGGCACGCGGCGACCGGCAGTTGGGAACACACCAGGCCAGGATACGGAACCCCCTGCTGCCCACAAGCGGCCAAGCGCTTCCAACACTCCTGCTGCTTCTTCACGTCCGGCGCGCAGCGATGCTAACAAGGTCGGTTCTGCTTCCGGTAAGCACG
	R87	ggctttccggtgcggatccaatgcaccagaaaaccgccttccagatccaccggcgtGCGAGGGATTTCCGGCCAGTCCACTCTGTAGAACCACCCCTGGGTTGGATCGGCGGCTGCGTGACGACGTGAGTCAGGCTCAATATCGGGCCAATAACGCTGACGCTGCCAAGGGTACGTAGGAAGAGGCACGCGGCGACCGGCAGTTGGGAACACACCAGGCCAGGATACGGAACCCCCTGCTGCCCACAAGCGGCCAAGCGCTTCCAACACTCCTGCTGCTTCTTCACGTCCGGCGCGCAGCGATGCTAACAAGGTCGGTTCTGCTTCCGGTAAGCACG
	R88	ggctttccggtgcggatccaatgcaccagaaaaccgccttccagatccaccggCGAGCGAGGGATTTCCGGCCAGTCCACTCTGTAGAACCACCCCTGGGTTGGATCGGCGGCTGCGTGACGACGTGAGTCAGGCTCAATATCGGGCCAATAACGCTGACGCTGCCAAGGGTACGTAGGAAGAGGCACGCGGCGACCGGCAGTTGGGAACACACCAGGCCAGGATACGGAACCCCCTGCTGCCCACAAGCGGCCAAGCGCTTCCAACACTCCTGCTGCTTCTTCACGTCCGGCGCGCAGCGATGCTAACAAGGTCGGTTCTGCTTCCGGTAAGCACG
	R89	ggctttccggtgcggatccaatgcaccagaaaaccgccttccagatccacAAGCGAGCGAGGGATTTCCGGCCAGTCCACTCTGTAGAACCACCCCTGGGTTGGATCGGCGGCTGCGTGACGACGTGAGTCAGGCTCAATATCGGGCCAATAACGCTGACGCTGCCAAGGGTACGTAGGAAGAGGCACGCGGCGACCGGCAGTTGGGAACACACCAGGCCAGGATACGGAACCCCCTGCTGCCCACAAGCGGCCAAGCGCTTCCAACACTCCTGCTGCTTCTTCACGTCCGGCGCGCAGCGATGCTAACAAGGTCGGTTCTGCTTCCGGTAAGCACG
	R90	ggctttccggtgcggatccaatgcaccagaaaaccgccttccagatcCTGAAGCGAGCGAGGGATTTCCGGCCAGTCCACTCTGTAGAACCACCCCTGGGTTGGATCGGCGGCTGCGTGACGACGTGAGTCAGGCTCAATATCGGGCCAATAACGCTGACGCTGCCAAGGGTACGTAGGAAGAGGCACGCGGCGACCGGCAGTTGGGAACACACCAGGCCAGGATACGGAACCCCCTGCTGCCCACAAGCGGCCAAGCGCTTCCAACACTCCTGCTGCTTCTTCACGTCCGGCGCGCAGCGATGCTAACAAGGTCGGTTCTGCTTCCGGTAAGCACG
	R91	ggctttccggtgcggatccaatgcaccagaaaaccgccttccagTTTCTGAAGCGAGCGAGGGATTTCCGGCCAGTCCACTCTGTAGAACCACCCCTGGGTTGGATCGGCGGCTGCGTGACGACGTGAGTCAGGCTCAATATCGGGCCAATAACGCTGACGCTGCCAAGGGTACGTAGGAAGAGGCACGCGGCGACCGGCAGTTGGGAACACACCAGGCCAGGATACGGAACCCCCTGCTGCCCACAAGCGGCCAAGCGCTTCCAACACTCCTGCTGCTTCTTCACGTCCGGCGCGCAGCGATGCTAACAAGGTCGGTTCTGCTTCCGGTAAGCACG
	R92	ggctttccggtgcggatccaatgcaccagaaaaccgccttccagAGATTTCTGAAGCGAGCGAGGGATTTCCGGCCAGTCCACTCTGTAGAACCACCCCTGGGTTGGATCGGCGGCTGCGTGACGACGTGAGTCAGGCTCAATATCGGGCCAATAACGCTGACGCTGCCAAGGGTACGTAGGAAGAGGCACGCGGCGACCGGCAGTTGGGAACACACCAGGCCAGGATACGGAACCCCCTGCTGCCCACAAGCGGCCAAGCGCTTCCAACACTCCTGCTGCTTCTTCACGTCCGGCGCGCAGCGATGCTAACAAGGTCGGTTCTGCTTCCGGTAAGCACG
	R93	ggctttccggtgcggatccaatgcaccagaaaaccgccttccagTTCAGATTTCTGAAGCGAGCGAGGGATTTCCGGCCAGTCCACTCTGTAGAACCACCCCTGGGTTGGATCGGCGGCTGCGTGACGACGTGAGTCAGGCTCAATATCGGGCCAATAACGCTGACGCTGCCAAGGGTACGTAGGAAGAGGCACGCGGCGACCGGCAGTTGGGAACACACCAGGCCAGGATACGGAACCCCCTGCTGCCCACAAGCGGCCAAGCGCTTCCAACACTCCTGCTGCTTCTTCACGTCCGGCGCGCAGCGATGCTAACAAGGTCGGTTCTGCTTCCGGTAAGCACG
	R94	ggctttccggtgcggatccaatgcaccagaaaaccgccttccagCTCTTCAGATTTCTGAAGCGAGCGAGGGATTTCCGGCCAGTCCACTCTGTAGAACCACCCCTGGGTTGGATCGGCGGCTGCGTGACGACGTGAGTCAGGCTCAATATCGGGCCAATAACGCTGACGCTGCCAAGGGTACGTAGGAAGAGGCACGCGGCGACCGGCAGTTGGGAACACACCAGGCCAGGATACGGAACCCCCTGCTGCCCACAAGCGGCCAAGCGCTTCCAACACTCCTGCTGCTTCTTCACGTCCGGCGCGCAGCGATGCTAACAAGGTCGGTTCTGCTTCCGGTAAGCACG
	R95	ggctttccggtgcggatccaatgcaccagaaaaccgccttccagTGCCTCTTCAGATTTCTGAAGCGAGCGAGGGATTTCCGGCCAGTCCACTCTGTAGAACCACCCCTGGGTTGGATCGGCGGCTGCGTGACGACGTGAGTCAGGCTCAATATCGGGCCAATAACGCTGACGCTGCCAAGGGTACGTAGGAAGAGGCACGCGGCGACCGGCAGTTGGGAACACACCAGGCCAGGATACGGAACCCCCTGCTGCCCACAAGCGGCCAAGCGCTTCCAACACTCCTGCTGCTTCTTCACGTCCGGCGCGCAGCGATGCTAACAAGGTCGGTTCTGCTTCCGGTAAGCACG
	R96	ggctttccggtgcggatccaatgcaccagaaaaccgccttcGCTTGCCTCTTCAGATTTCTGAAGCGAGCGAGGGATTTCCGGCCAGTCCACTCTGTAGAACCACCCCTGGGTTGGATCGGCGGCTGCGTGACGACGTGAGTCAGGCTCAATATCGGGCCAATAACGCTGACGCTGCCAAGGGTACGTAGGAAGAGGCACGCGGCGACCGGCAGTTGGGAACACACCAGGCCAGGATACGGAACCCCCTGCTGCCCACAAGCGGCCAAGCGCTTCCAACACTCCTGCTGCTTCTTCACGTCCGGCGCGCAGCGATGCTAACAAGGTCGGTTCTGCTTCCGGTAAGCACG
	R97	ggctttccggtgcggatccaatgcaccagaaaaccgccACGGCTTGCCTCTTCAGATTTCTGAAGCGAGCGAGGGATTTCCGGCCAGTCCACTCTGTAGAACCACCCCTGGGTTGGATCGGCGGCTGCGTGACGACGTGAGTCAGGCTCAATATCGGGCCAATAACGCTGACGCTGCCAAGGGTACGTAGGAAGAGGCACGCGGCGACCGGCAGTTGGGAACACACCAGGCCAGGATACGGAACCCCCTGCTGCCCACAAGCGGCCAAGCGCTTCCAACACTCCTGCTGCTTCTTCACGTCCGGCGCGCAGCGATGCTAACAAGGTCGGTTCTGCTTCCGGTAAGCACG
	R99	ggctttccggtgcggatccaatgcaccagaaaCGACCCACGGCTTGCCTCTTCAGATTTCTGAAGCGAGCGAGGGATTTCCGGCCAGTCCACTCTGTAGAACCACCCCTGGGTTGGATCGGCGGCTGCGTGACGACGTGAGTCAGGCTCAATATCGGGCCAATAACGCTGACGCTGCCAAGGGTACGTAGGAAGAGGCACGCGGCGACCGGCAGTTGGGAACACACCAGGCCAGGATACGGAACCCCCTGCTGCCCACAAGCGGCCAAGCGCTTCCAACACTCCTGCTGCTTCTTCACGTCCGGCGCGCAGCGATGCTAACAAGGTCGGTTCTGCTTCCGGTAAGCACG
	R100	ggctttccggtgcggatccaatgcaccagCCACGACCCACGGCTTGCCTCTTCAGATTTCTGAAGCGAGCGAGGGATTTCCGGCCAGTCCACTCTGTAGAACCACCCCTGGGTTGGATCGGCGGCTGCGTGACGACGTGAGTCAGGCTCAATATCGGGCCAATAACGCTGACGCTGCCAAGGGTACGTAGGAAGAGGCACGCGGCGACCGGCAGTTGGGAACACACCAGGCCAGGATACGGAACCCCCTGCTGCCCACAAGCGGCCAAGCGCTTCCAACACTCCTGCTGCTTCTTCACGTCCGGCGCGCAGCGATGCTAACAAGGTCGGTTCTGCTTCCGGTAAGCACG
	R103	ggctttccggtgcggatccaAAGGACAAGCCACGACCCACGGCTTGCCTCTTCAGATTTCTGAAGCGAGCGAGGGATTTCCGGCCAGTCCACTCTGTAGAACCACCCCTGGGTTGGATCGGCGGCTGCGTGACGACGTGAGTCAGGCTCAATATCGGGCCAATAACGCTGACGCTGCCAAGGGTACGTAGGAAGAGGCACGCGGCGACCGGCAGTTGGGAACACACCAGGCCAGGATACGGAACCCCCTGCTGCCCACAAGCGGCCAAGCGCTTCCAACACTCCTGCTGCTTCTTCACGTCCGGCGCGCAGCGATGCTAACAAGGTCGGTTCTGCTTCCGGTAAGCACG
